# Supplementary material for: Synthesis, α-mannosidase inhibition studies and molecular modeling of 1,4-imino-ᴅ-lyxitols and their C-5-altered N-arylalkyl derivatives
Source: publisher site journal article supplement (doi:10.3762/bjoc.19.24), 2023-03-06

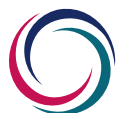

## Supporting Information

for

### **Synthesis, $\alpha$ -mannosidase inhibition studies and molecular modeling of 1,4-imino-D-lyxitols and their C-5-altered *N*-arylalkyl derivatives**

Martin Kalník, Sergej Šesták, Juraj Kóňa, Maroš Bella and Monika Poláková

*Beilstein J. Org. Chem.* **2023**, *19*, 282–293. doi:10.3762/bjoc.19.24

## Copies of NMR spectra

## Table of contents

|                                                                           |        |
|---------------------------------------------------------------------------|--------|
| $^1\text{H}$ and $^{13}\text{C}$ NMR spectra of the target compounds..... | S2–S13 |
|---------------------------------------------------------------------------|--------|



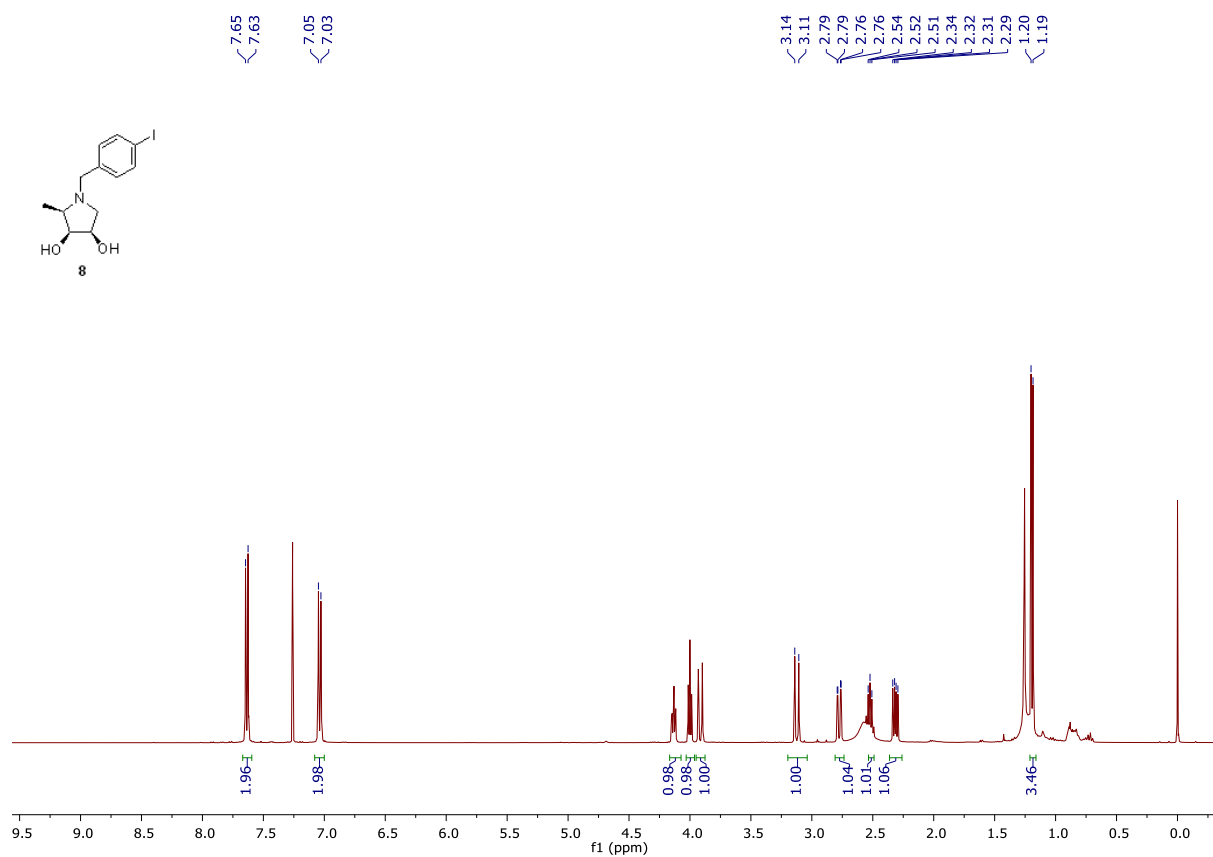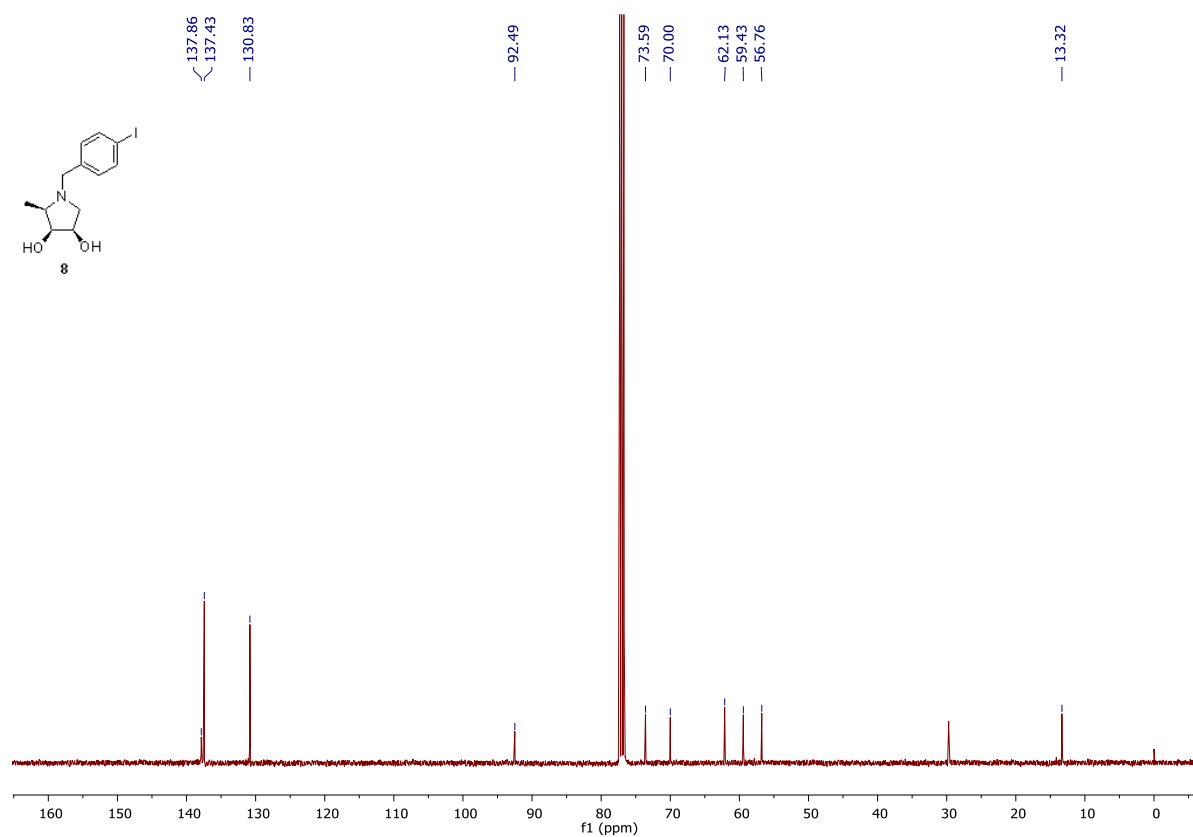

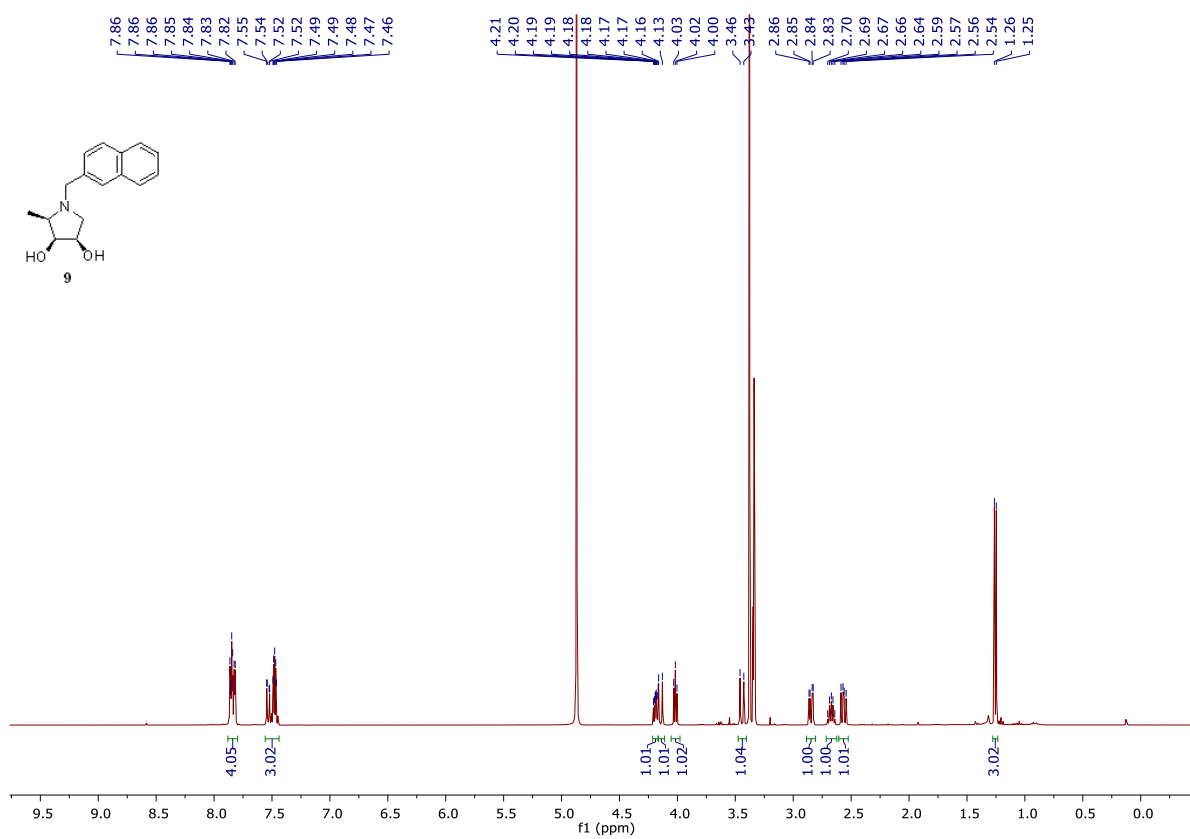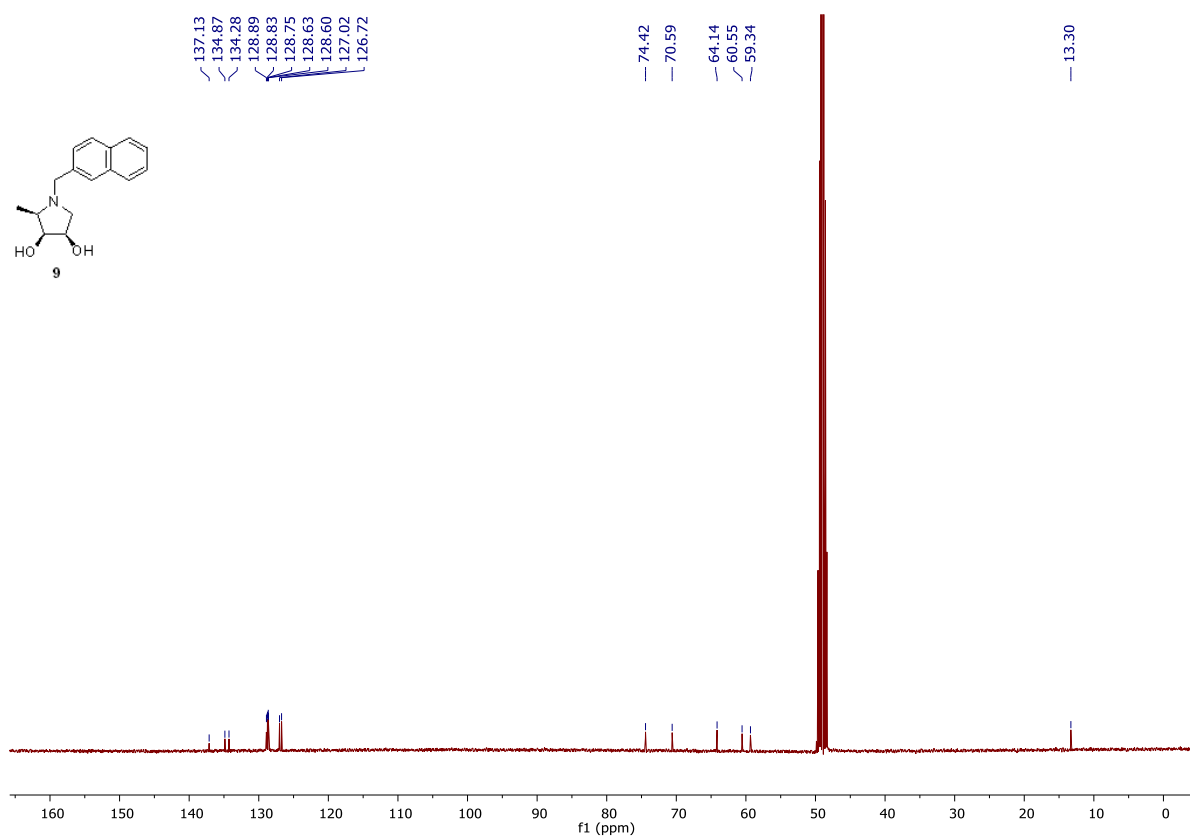

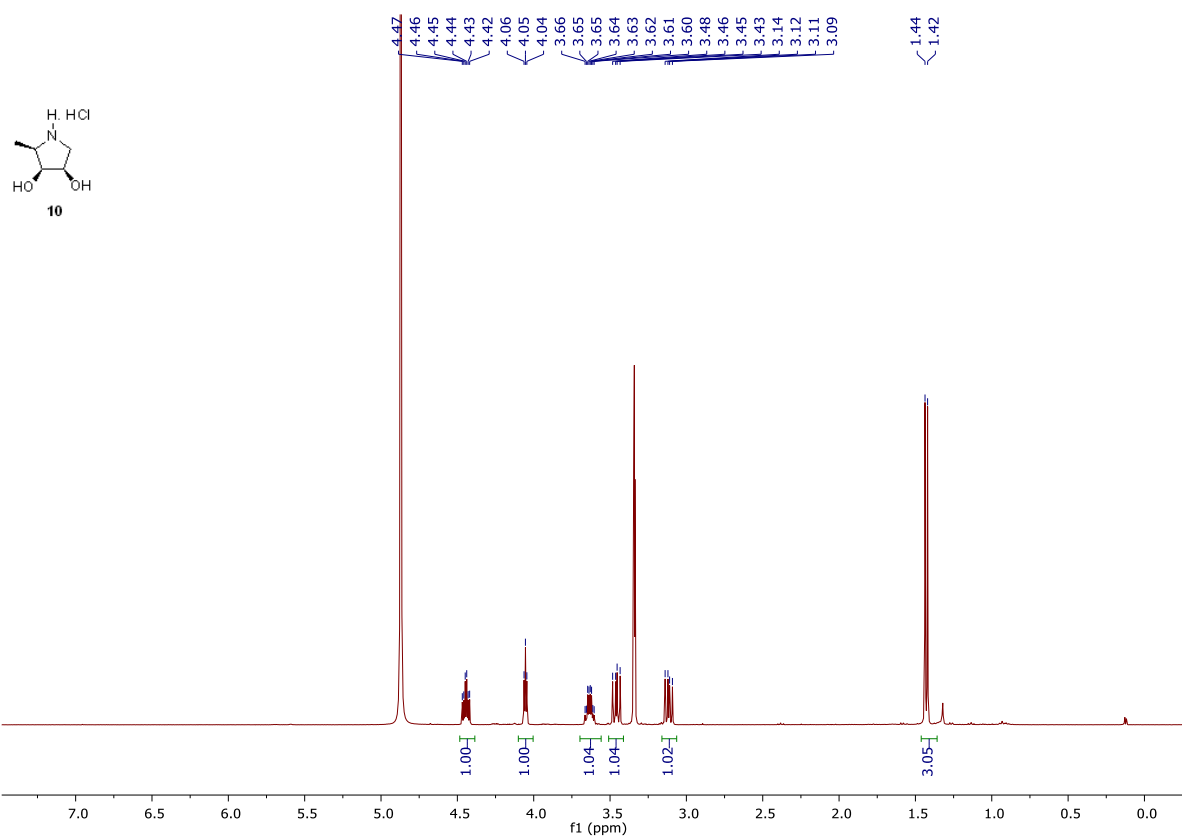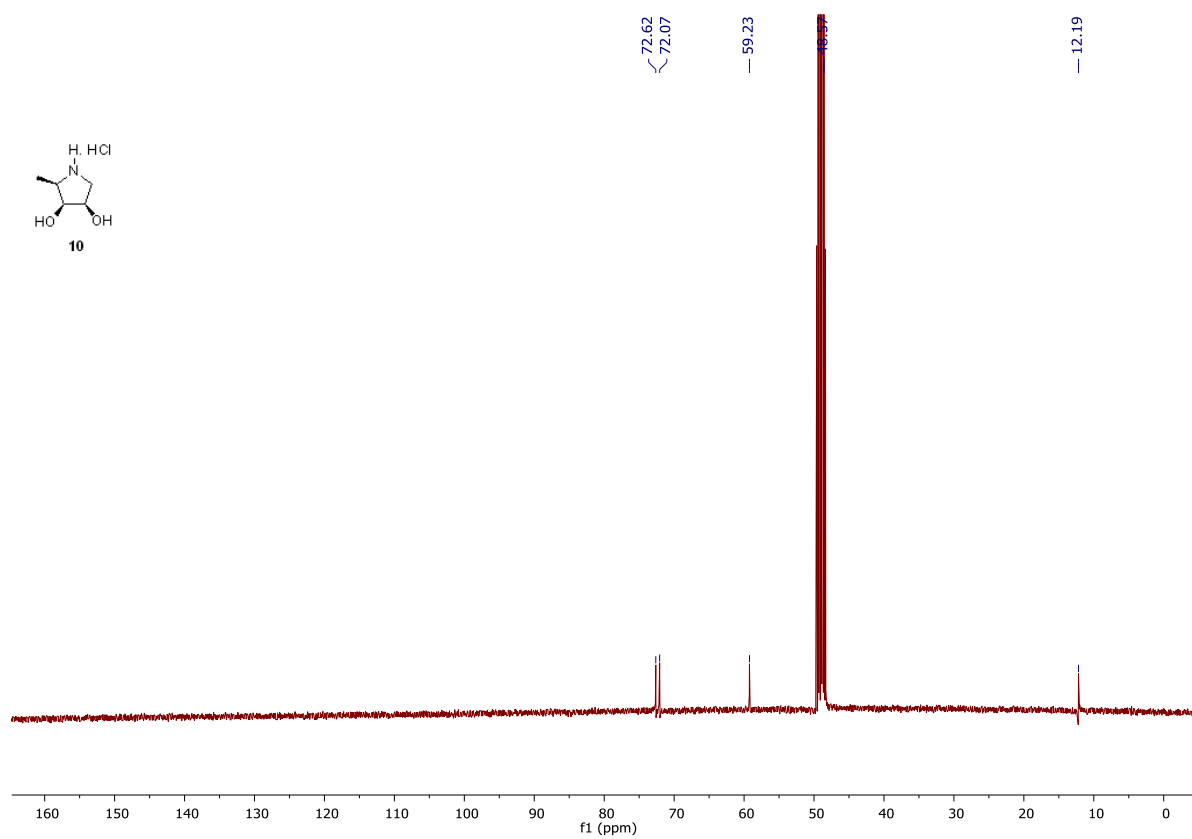

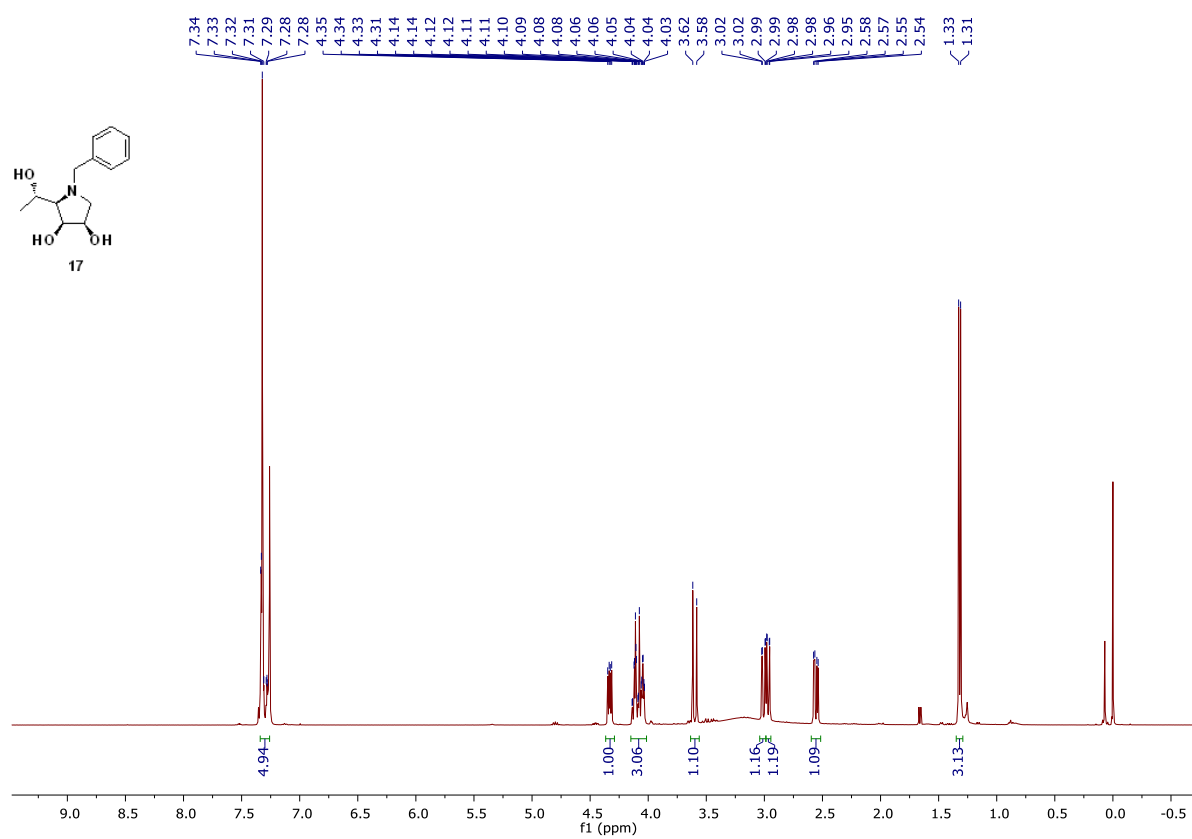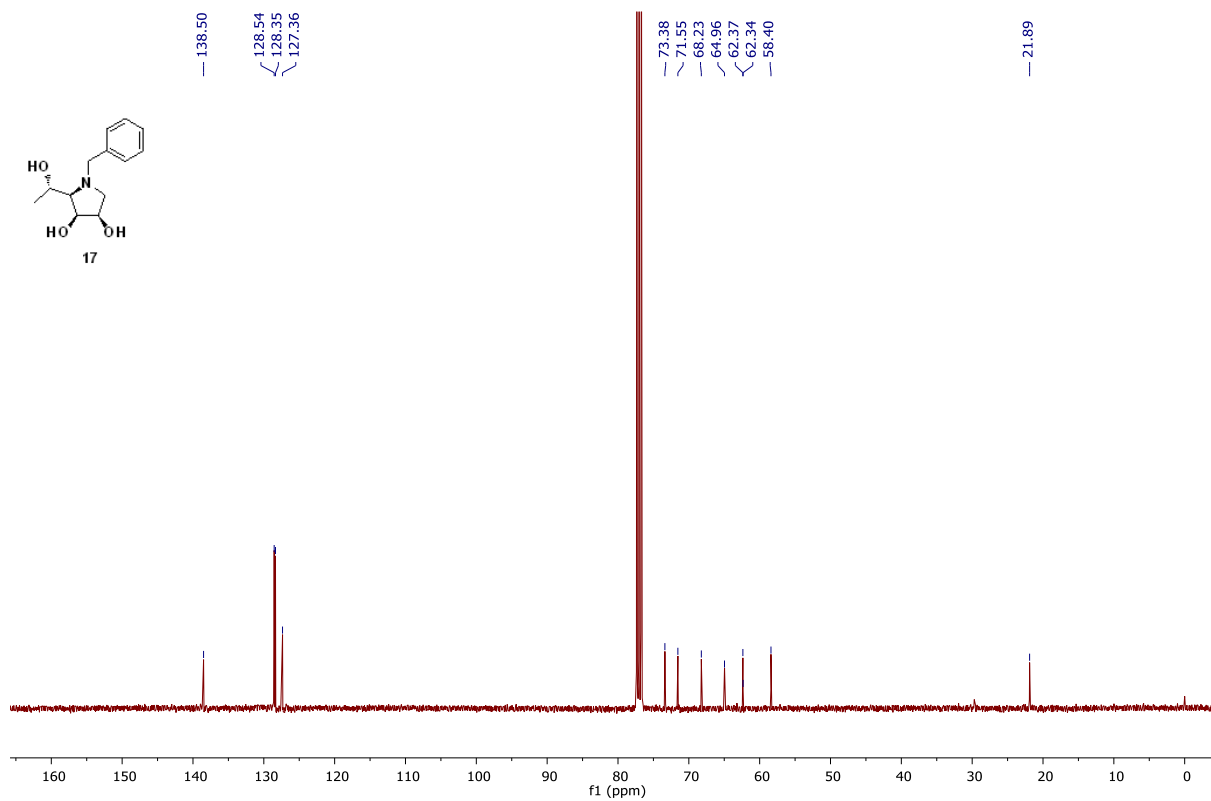

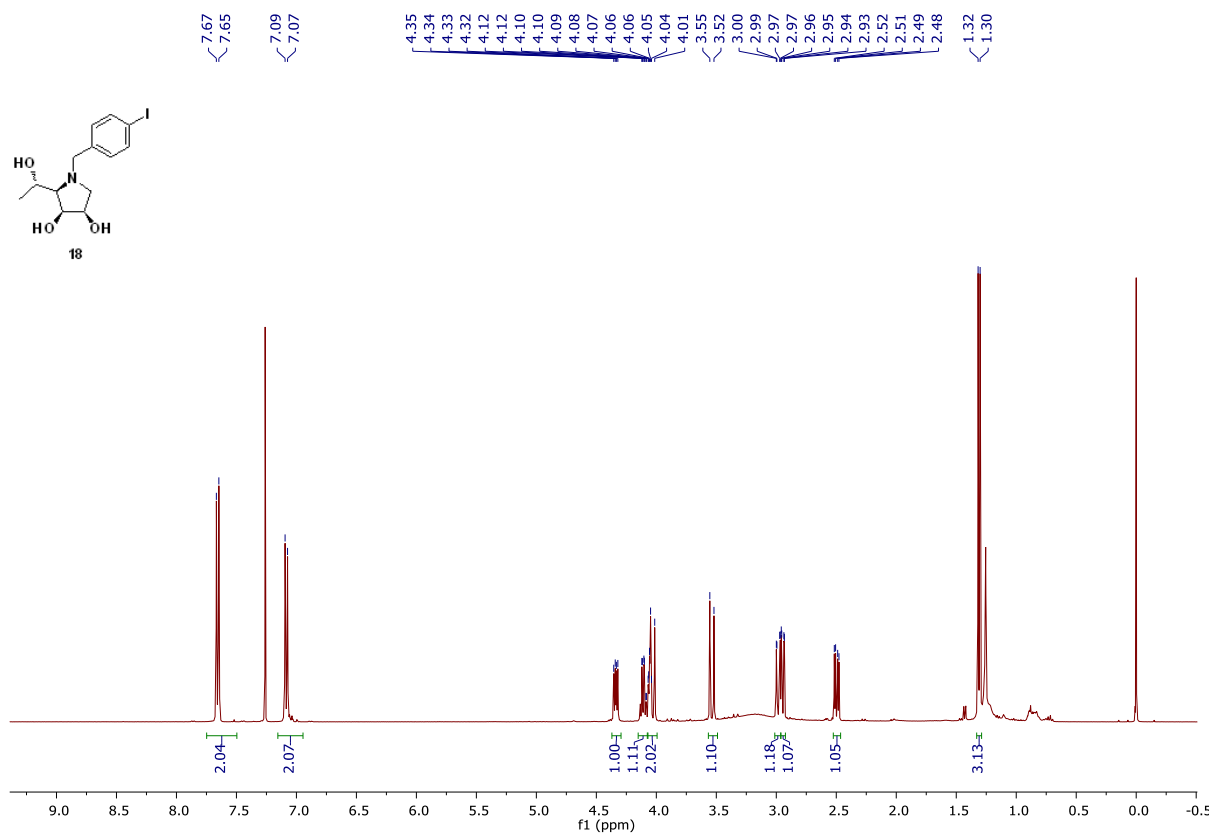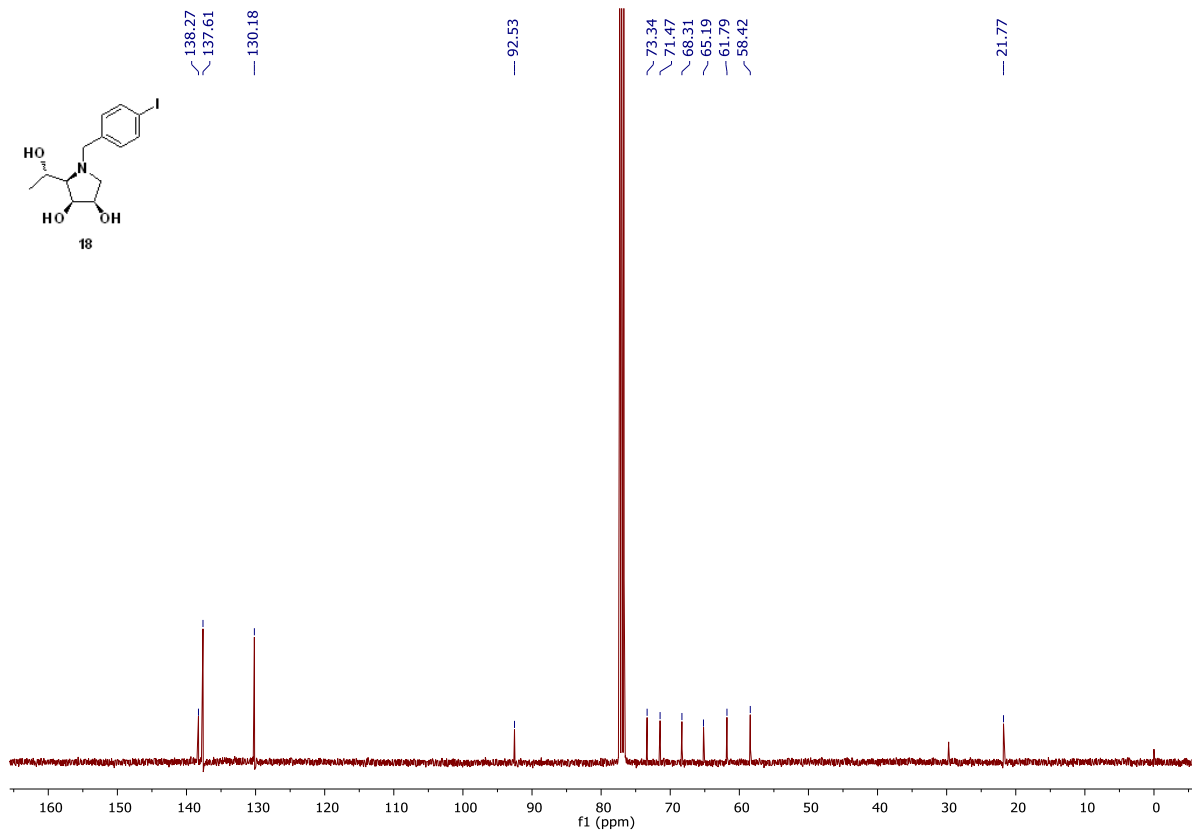



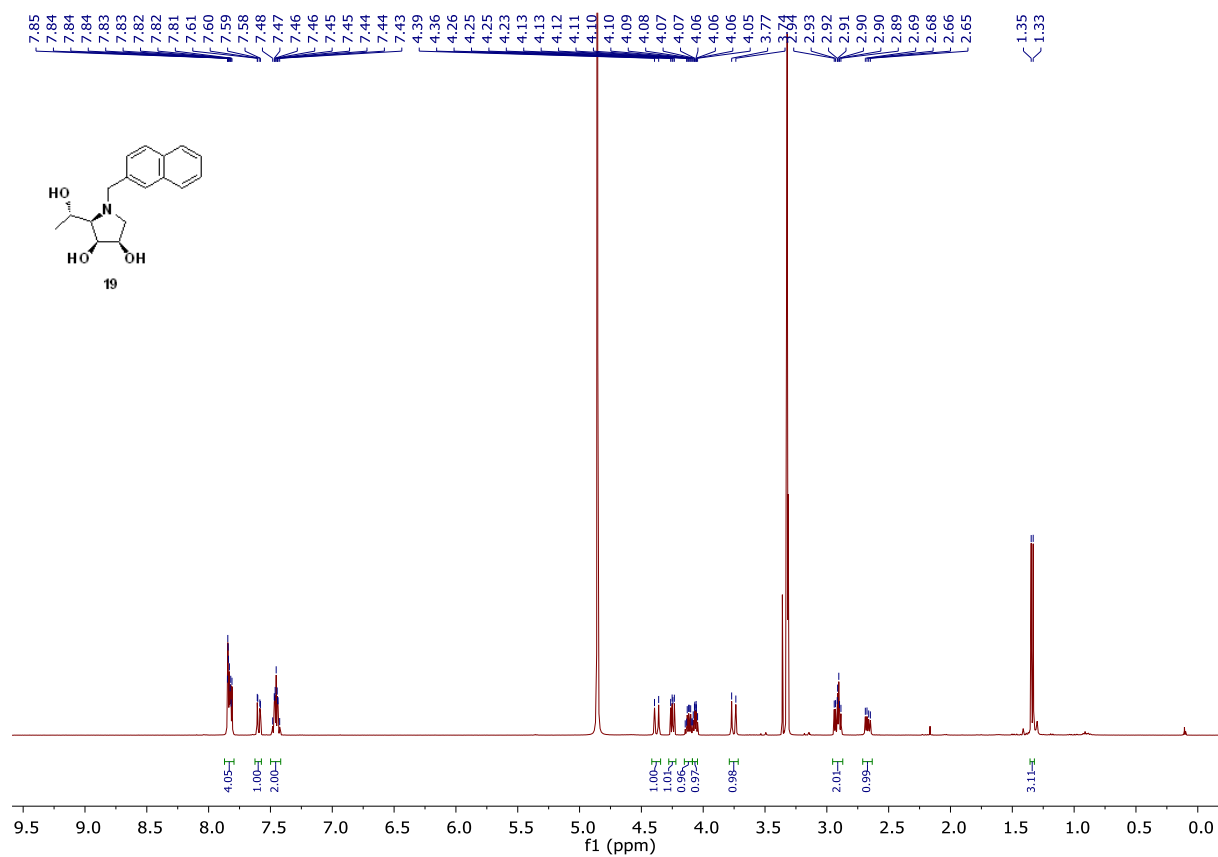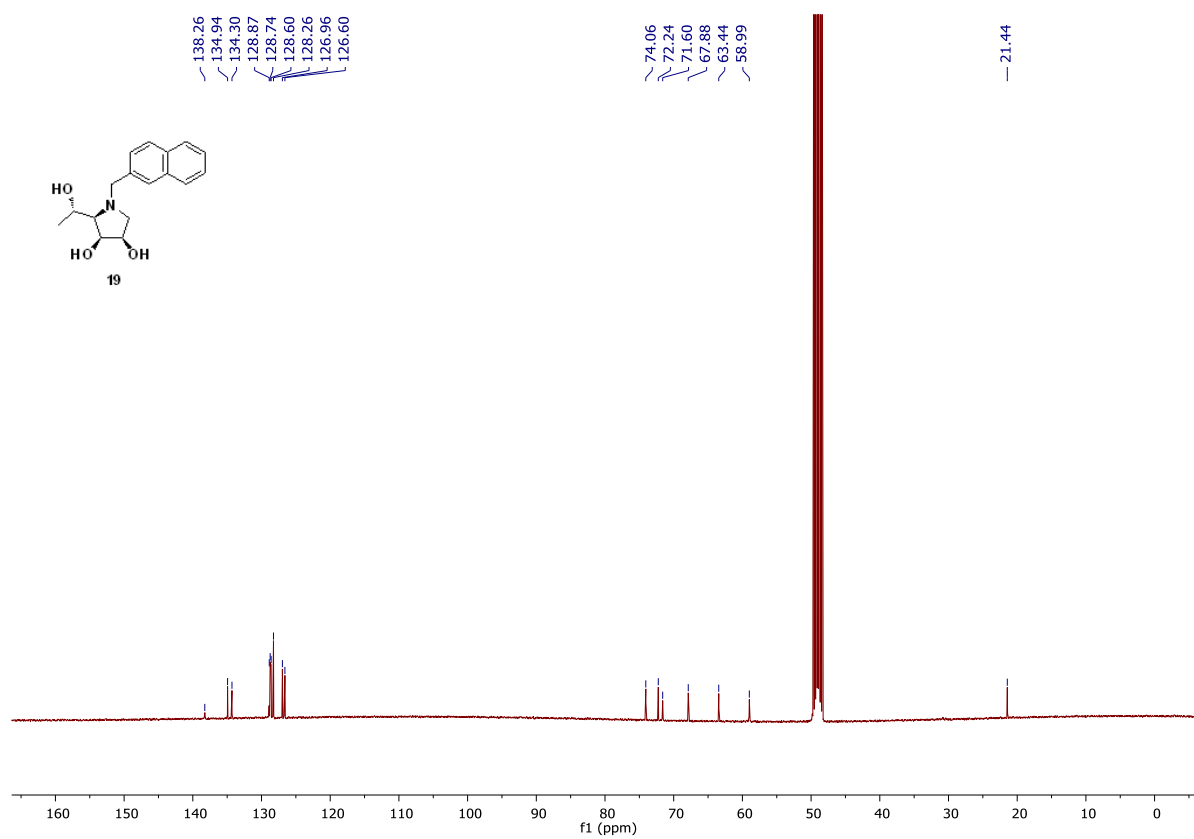

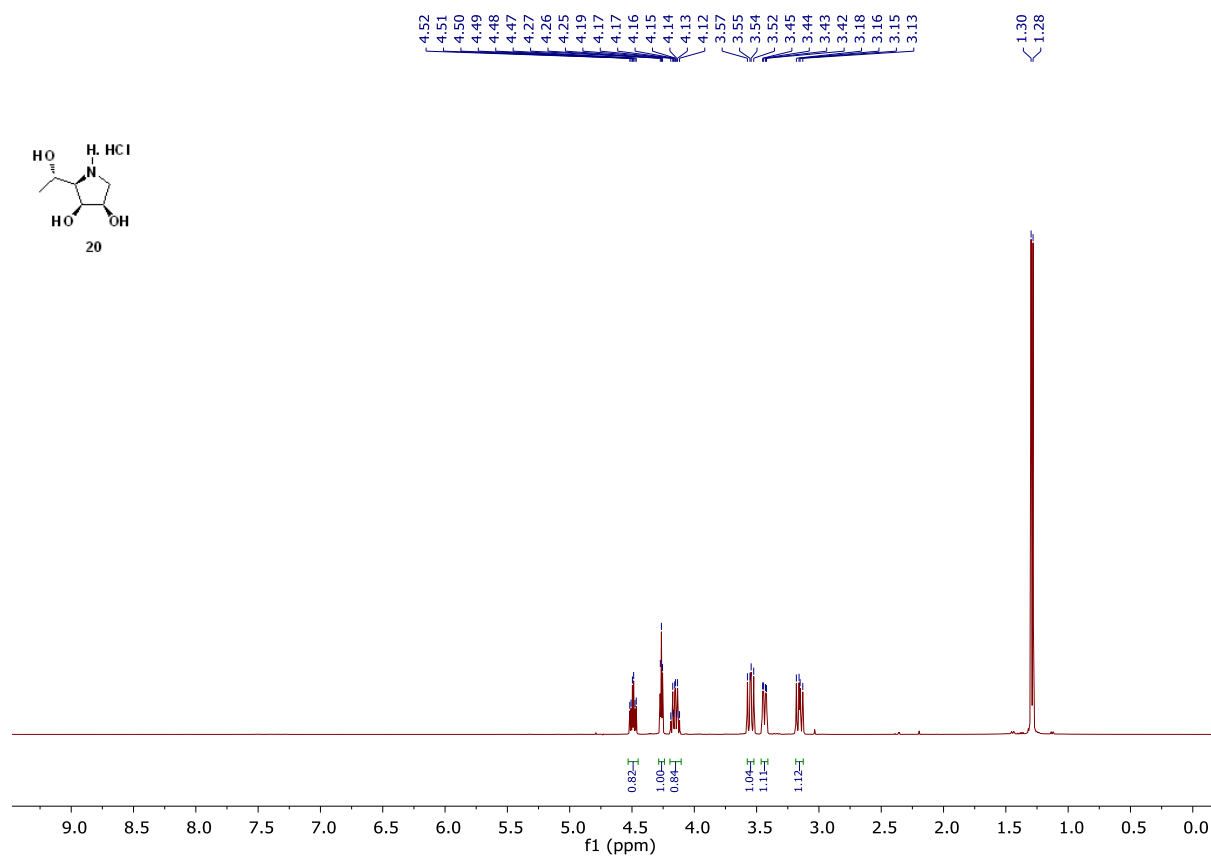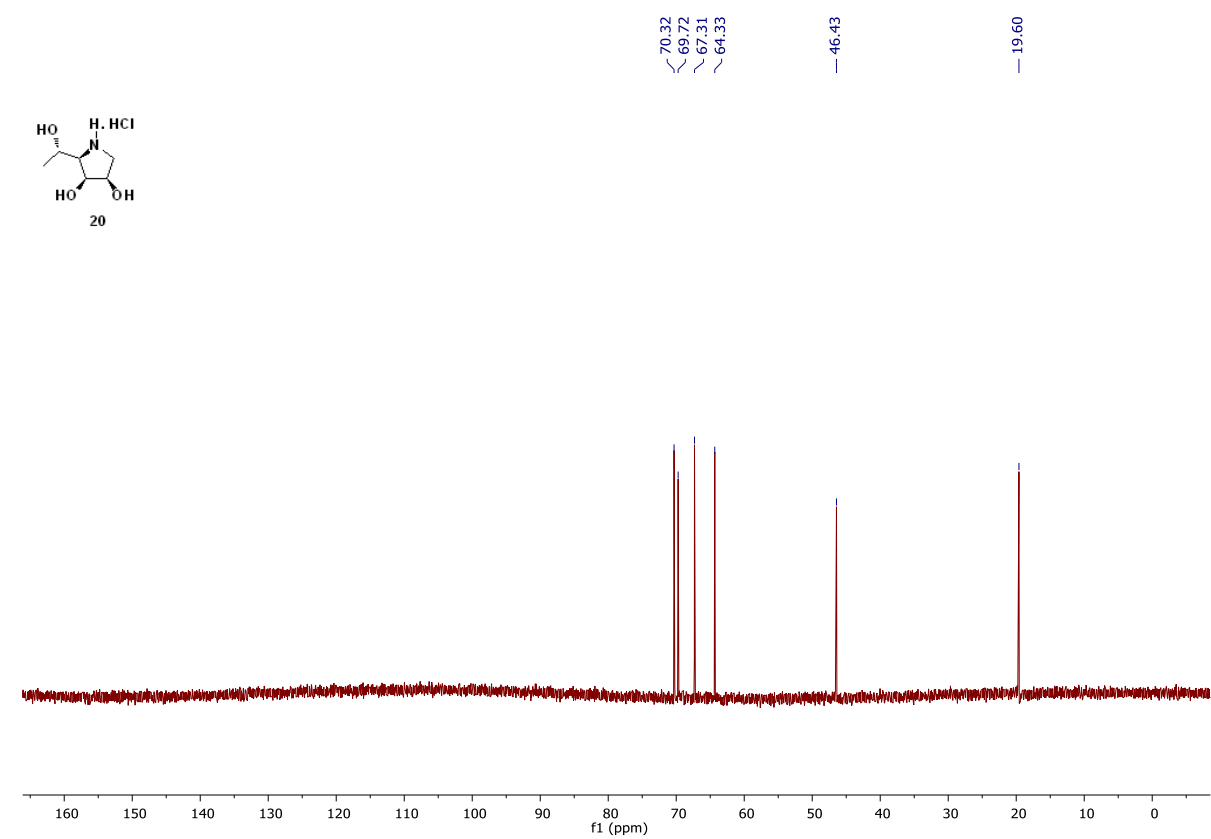

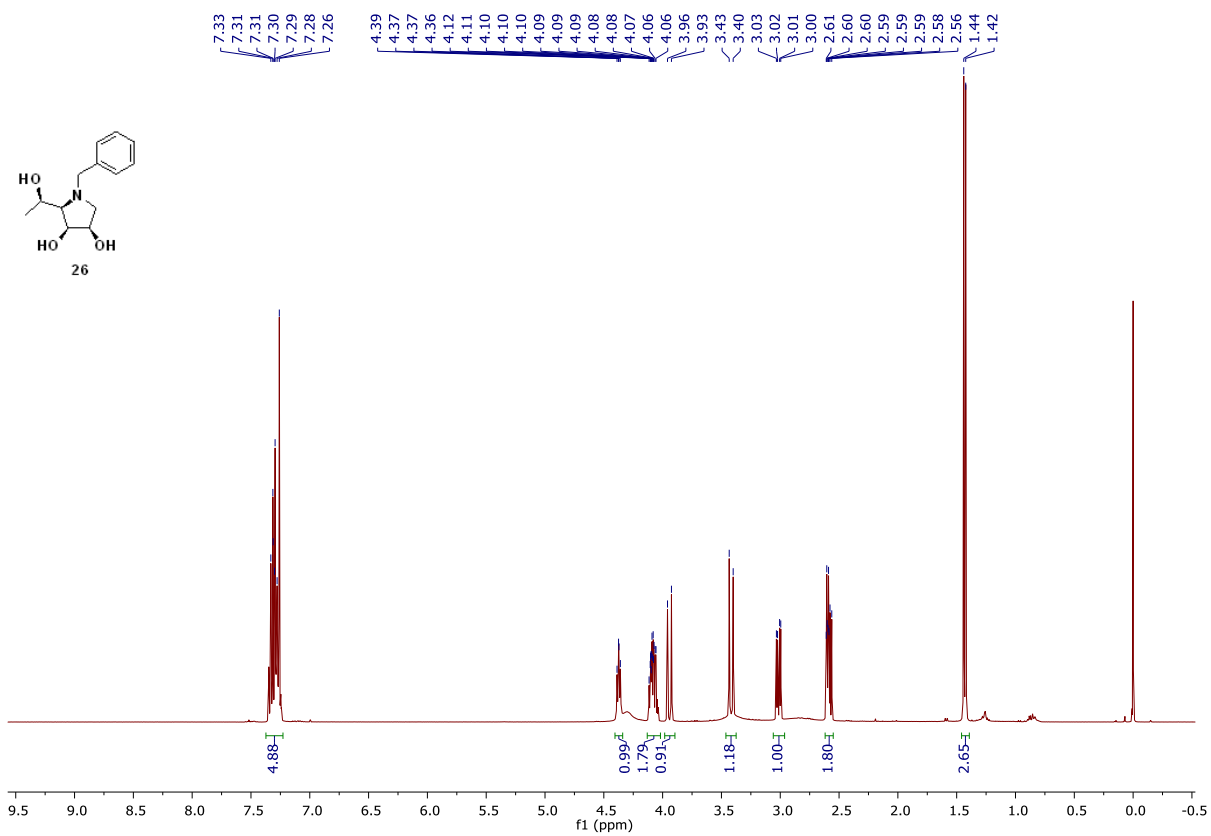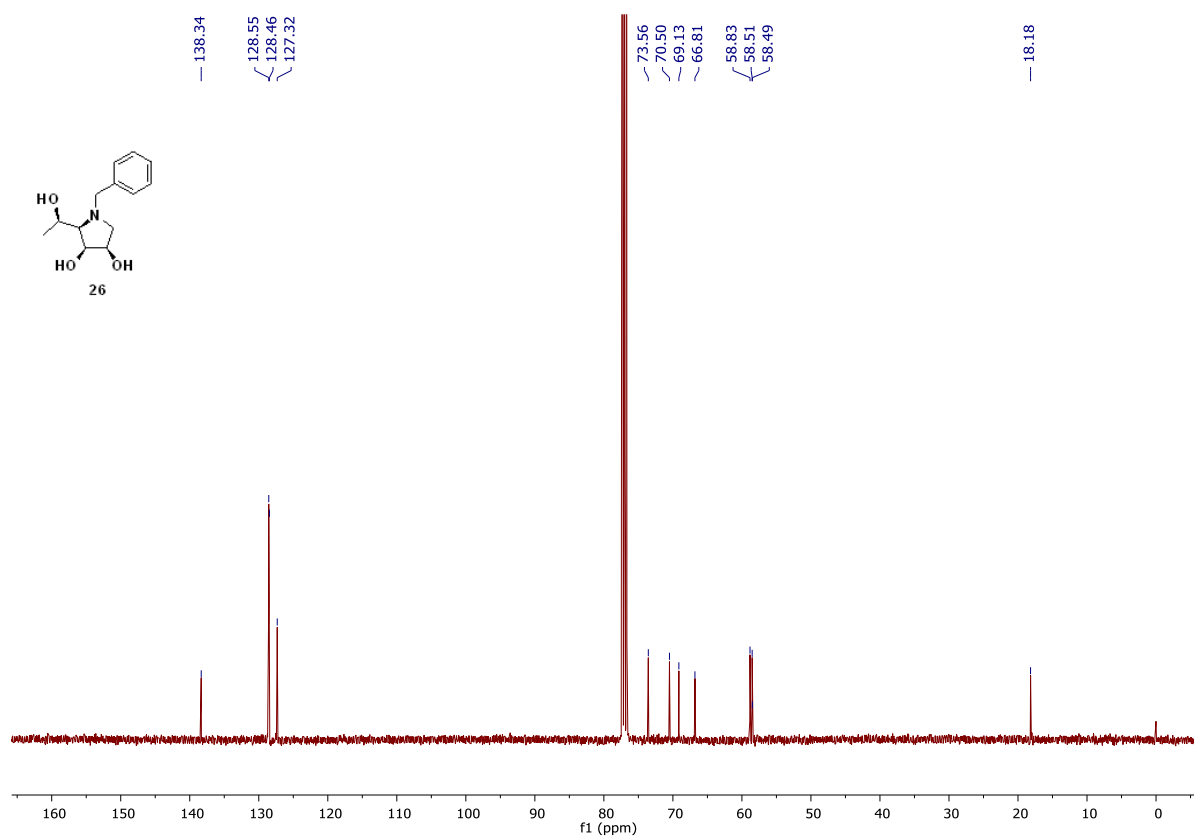

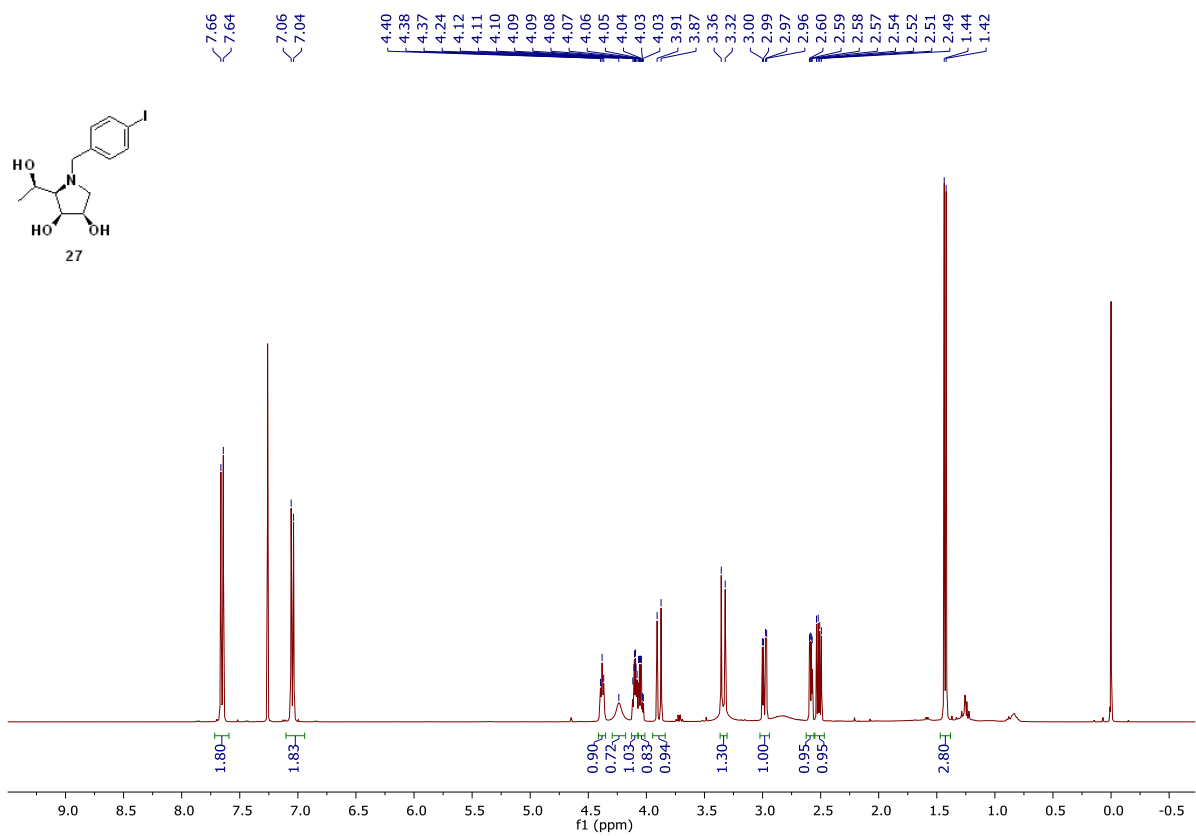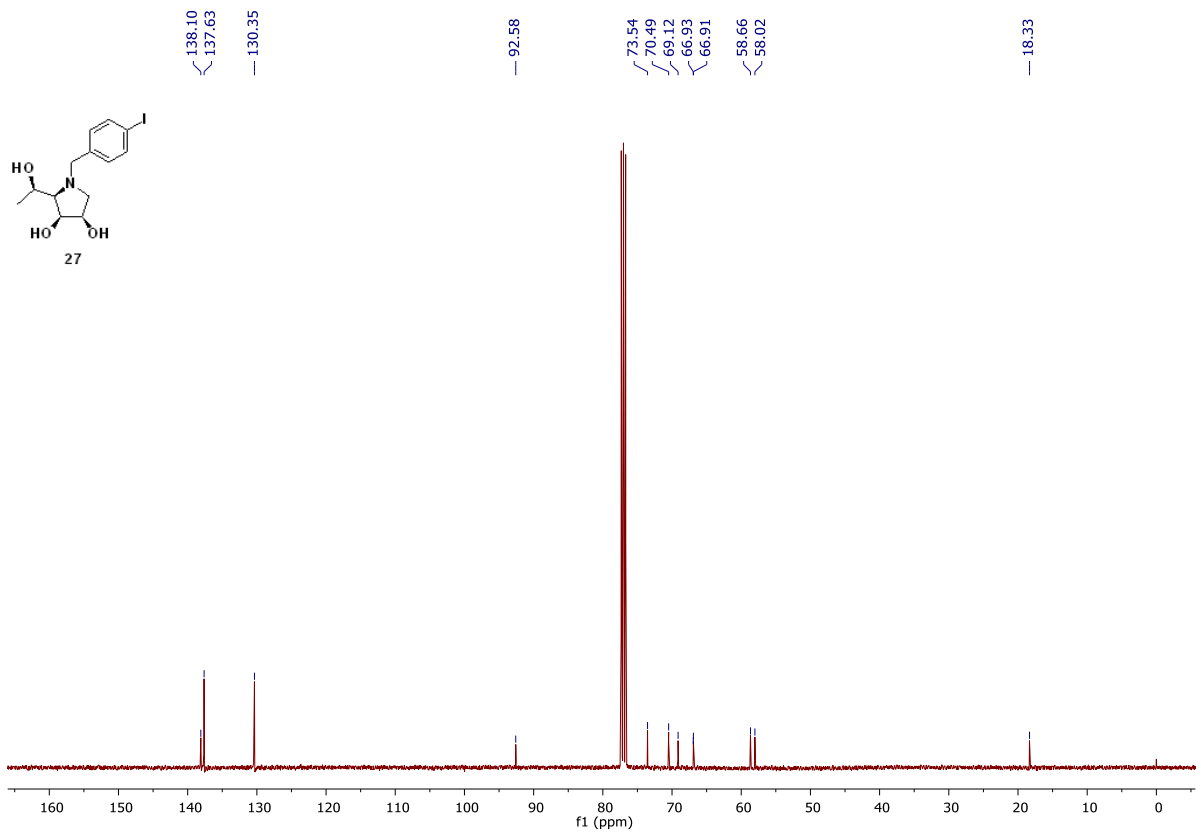

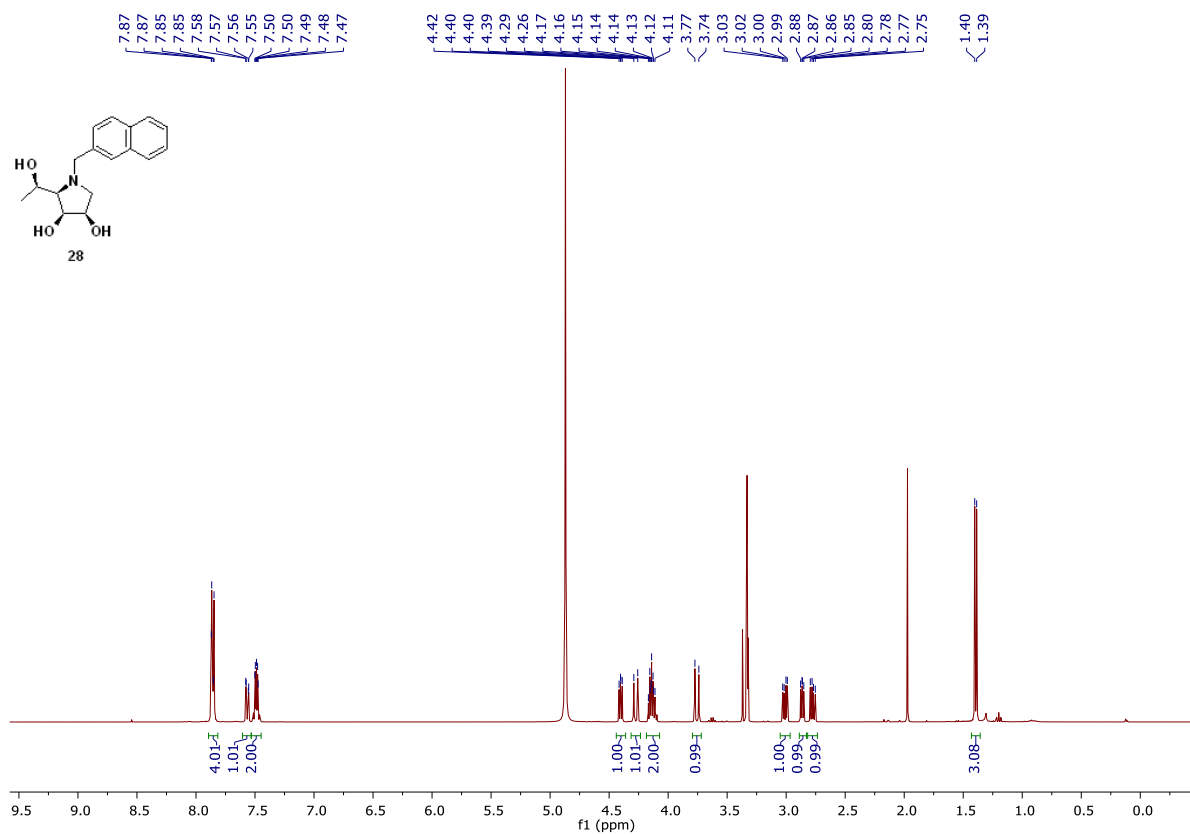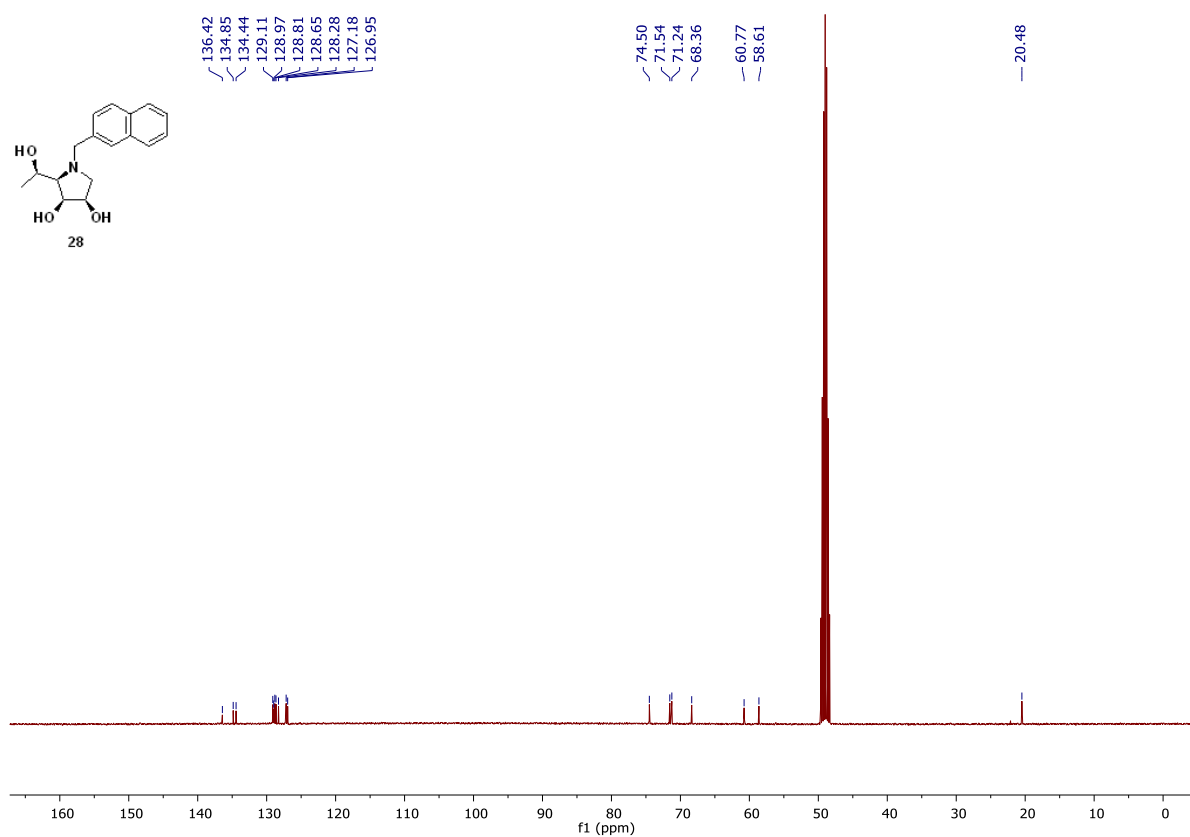

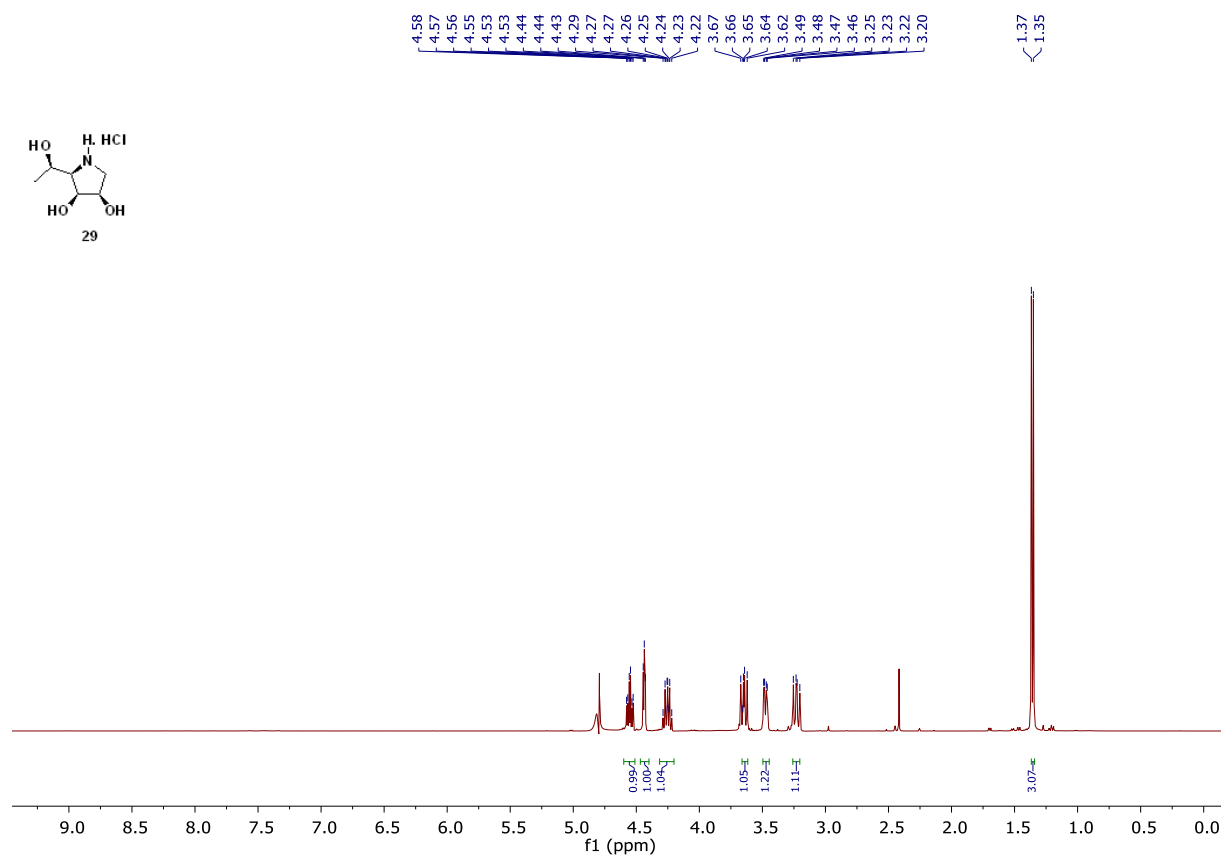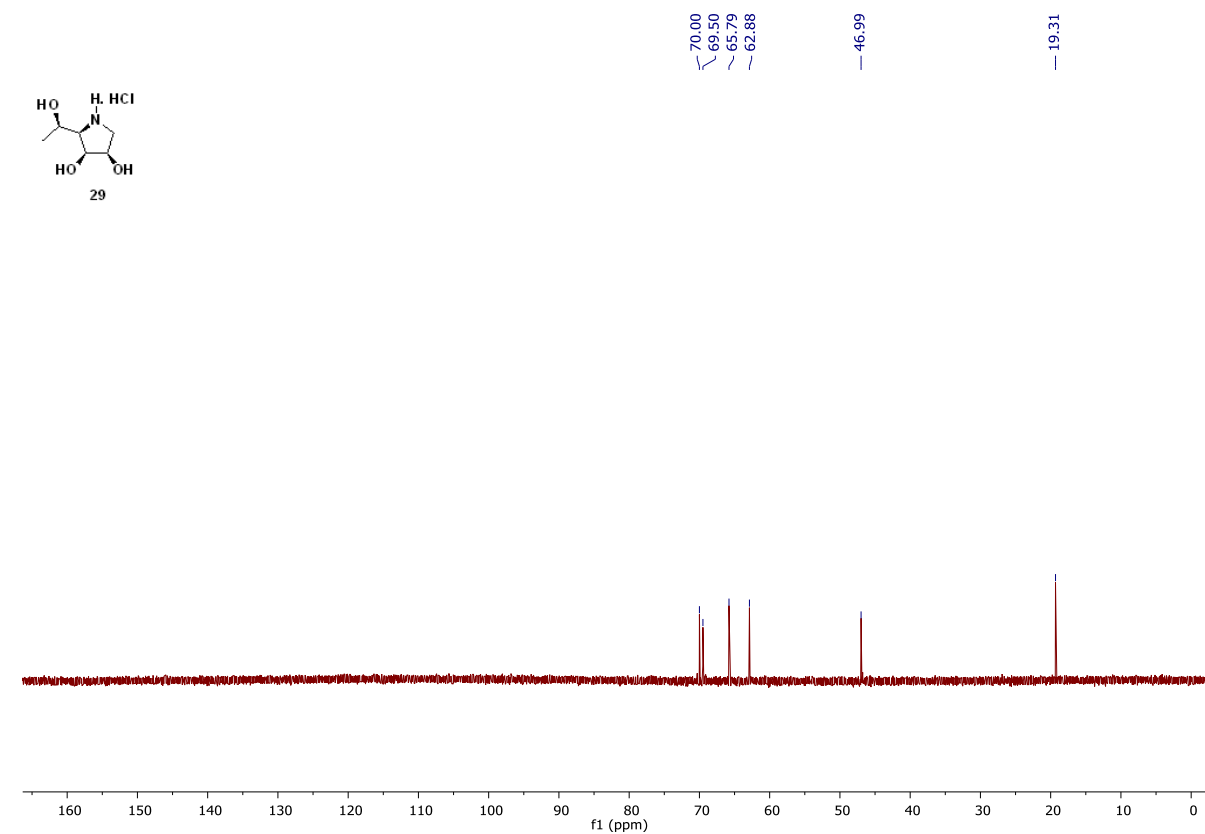

Supplement: Additional file 2 [file 1860-5397-19-24-S2.pdf]
