# Supplementary material for: Synthesis, α-mannosidase inhibition studies and molecular modeling of 1,4-imino-ᴅ-lyxitols and their C-5-altered N-arylalkyl derivatives
Source: Beilstein J Org Chem. 2023 Mar 6;19:282–93. doi: 10.3762/bjoc.19.24 (PMC10012049; doi:10.3762/bjoc.19.24)
Supplement: File 3 — Optimized QM/MM complexes (inhibitor:enzyme). [file Beilstein_J_Org_Chem-19-282-s003.mae]

{ 
 s_m_m2io_version
 :::
 2.0.0 
} 

f_m_ct { 
 s_m_title
 s_qs_QM_Task
 s_qs_QM_Method
 s_qs_QM_Basis
 s_qs_ForceField
 r_qs_QM/MM_Energy
 i_m_ct_format
 :::
 10_qmmm_optimized_dGMII 
  Optimization 
  DFT(bp86) 
  lacvp* 
  opls2005 
  -6747.84727024612
  2
 m_depend[33] { 
  # First column is dependency index #
  i_m_depend_dependency
  s_m_depend_property
  :::
  1 30 r_i_docking_score 
  2 30 s_m_job_name 
  3 30 r_i_glide_gscore 
  4 30 r_i_glide_evdw 
  5 30 r_i_glide_ecoul 
  6 30 r_i_glide_emodel 
  7 30 r_i_glide_energy 
  8 30 r_i_glide_hbond 
  9 30 r_i_glide_lipo 
  10 30 r_i_glide_metal 
  11 30 i_i_glide_posenum 
  12 30 i_i_glide_lignum 
  13 30 r_i_glide_erotb 
  14 30 r_i_glide_esite 
  15 30 r_i_glide_einternal 
  16 30 i_i_glide_confnum 
  17 20 s_qs_QM_Task 
  18 20 s_qs_QM_Method 
  19 20 s_qs_QM_Basis 
  20 20 s_qs_ForceField 
  21 20 r_qs_QM/MM_Energy 
  22 20 r_mmod_Potential_Energy-OPLS-2005 
  23 20 r_mmod_Stretch_Energy-OPLS-2005 
  24 20 r_mmod_Bend_Energy-OPLS-2005 
  25 20 r_mmod_Torsional_Energy-OPLS-2005 
  26 20 r_mmod_Improper_Torsional_Energy-OPLS-2005 
  27 20 r_mmod_Van_der_Waal_Energy-OPLS-2005 
  28 20 r_mmod_Electrostatic_Energy-OPLS-2005 
  29 20 r_mmod_Solvation_Energy-OPLS-2005 
  30 20 b_mmod_Minimization_Converged-OPLS-2005 
  31 20 r_mmod_RMS_Derivative-OPLS-2005 
  32 20 r_qs_HOMO 
  33 20 r_qs_LUMO 
  :::
 } 
 m_atom[16198] { 
  # First column is atom index #
  i_m_mmod_type
  r_m_x_coord
  r_m_y_coord
  r_m_z_coord
  i_m_residue_number
  s_m_mmod_res
  s_m_chain_name
  i_m_color
  r_m_charge1
  r_m_charge2
  s_m_pdb_residue_name
  s_m_pdb_atom_name
  s_m_grow_name
  i_m_atomic_number
  i_m_formal_charge
  i_m_representation
  i_m_visibility
  s_m_color_rgb
  s_m_atom_name
  i_m_secondary_structure
  r_m_pdb_tfactor
  r_m_pdb_occupancy
  r_glide_flexr_altx1
  r_glide_flexr_alty1
  r_glide_flexr_altz1
  r_glide_flexr_altx2
  r_glide_flexr_alty2
  r_glide_flexr_altz2
  r_qs_ESP_Charges
  i_pdb_PDB_serial
  i_i_constraint
  i_i_internal_atom_index
  i_ppw_water
  i_glide_flexr_naltpos
  b_glide_flexr_movable
  r_pdb_occupancy
  i_m_pdb_convert_problem
  i_ppw_het
  r_j_ESP_Charges
  i_ppw_original_index
  s_pdb_segment_id
  :::
  1 16 24.643000 61.249001 9.016000 1059 X A 70 -0.77027 -0.77027 "HOH " " O  " "    " 8 0 0 1 FF2F2F  O1  -1 13.12 1 0 0 0 0 0 0 -0.770266181300585 8619 1 1 1 0 0 <> <> <> <> <> <>
  2 42 24.380821 60.282347 8.987356 1059 X A 21 0.42867 0.42867 "HOH " " H1 " "    " 1 0 0 1 FFFFFF  H16178  -1 <> <> 0 0 0 0 0 0 0.428669198517701 <> 0 2 1 0 0 <> <> <> <> <> <>
  3 42 23.779350 61.712084 8.978423 1059 X A 21 0.37946 0.37946 "HOH " " H2 " "    " 1 0 0 1 FFFFFF  H16179  -1 <> <> 0 0 0 0 0 0 0.379459085565121 <> 0 3 1 0 0 <> <> <> <> <> <>
  4 32 41.739158 40.801258 -13.443725 31 C A 43 -0.30000 -0.30000 "CYS " " N  " "    " 7 1 0 0 5757FF  N1  0 <> 1 0 0 0 0 0 0 <> <> 0 4 <> 0 0 1 <> <> <> <> <>
  5 3 40.827964 40.786501 -14.605011 31 C A 2 0.25000 0.25000 "CYS " " CA " "    " 6 0 0 0 A0A0A0  C2  0 <> 1 0 0 0 0 0 0 <> <> 0 5 <> 0 0 1 <> <> <> <> <>
  6 2 40.245861 39.375410 -14.735246 31 C A 2 0.50000 0.50000 "CYS " " C  " "    " 6 0 0 0 A0A0A0  C3  0 <> 1 0 0 0 0 0 0 <> <> 0 6 <> 0 0 1 <> <> <> <> <>
  7 15 40.812099 38.428594 -14.179646 31 C A 70 -0.50000 -0.50000 "CYS " " O  " "    " 8 0 0 0 FF2F2F  O4  0 <> 1 0 0 0 0 0 0 <> <> 0 7 <> 0 0 1 <> <> <> <> <>
  8 3 41.571136 41.138271 -15.918831 31 C A 2 0.09750 0.09750 "CYS " " CB " "    " 6 0 0 0 A0A0A0  C5  0 <> 1 0 0 0 0 0 0 <> <> 0 8 <> 0 0 1 <> <> <> <> <>
  9 49 42.989684 40.038509 -16.271052 31 C A 13 -0.21750 -0.21750 "CYS " " SG " "    " 16 0 0 0 E1E11E  S6  0 <> 1 0 0 0 0 0 0 <> <> 0 9 <> 0 0 1 <> <> <> <> <>
  10 41 41.889491 42.178748 -15.912225 31 C A 21 0.06000 0.06000 "CYS " "1HB " "    " 1 0 0 0 FFFFFF  H7  0 <> 1 0 0 0 0 0 0 <> <> 0 10 <> 0 0 1 <> <> <> <> <>
  11 41 40.886937 41.075050 -16.768313 31 C A 21 0.06000 0.06000 "CYS " "2HB " "    " 1 0 0 0 FFFFFF  H8  0 <> 1 0 0 0 0 0 0 <> <> 0 11 <> 0 0 1 <> <> <> <> <>
  12 44 42.139898 41.700961 -13.160893 31 C A 21 0.33000 0.33000 "CYS " "1H  " "    " 1 0 0 0 FFFFFF  H9  0 <> 1 0 0 0 0 0 0 <> <> 0 12 <> 0 0 1 <> <> <> <> <>
  13 44 41.231644 40.392201 -12.634850 31 C A 21 0.33000 0.33000 "CYS " "2H  " "    " 1 0 0 0 FFFFFF  H10  0 <> 1 0 0 0 0 0 0 <> <> 0 13 <> 0 0 1 <> <> <> <> <>
  14 44 42.477116 40.146488 -13.632761 31 C A 21 0.33000 0.33000 "CYS " "3H  " "    " 1 0 0 0 FFFFFF  H11  0 <> 1 0 0 0 0 0 0 <> <> 0 14 <> 0 0 1 <> <> <> <> <>
  15 41 40.015731 41.492022 -14.424228 31 C A 21 0.06000 0.06000 "CYS " " HA " "    " 1 0 0 0 FFFFFF  H12  0 <> 1 0 0 0 0 0 0 <> <> 0 15 <> 0 0 1 <> <> <> <> <>
  16 25 39.177464 39.221619 -15.518565 32 Q A 43 -0.50000 -0.50000 "GLN " " N  " "    " 7 0 0 0 5757FF  N13  0 <> 1 0 0 0 0 0 0 <> <> 0 16 <> 0 0 1 <> <> <> <> <>
  17 3 38.748034 37.967498 -16.123986 32 Q A 2 0.14000 0.14000 "GLN " " CA " "    " 6 0 0 0 A0A0A0  C14  0 <> 1 0 0 0 0 0 0 <> <> 0 17 <> 0 0 1 <> <> <> <> <>
  18 2 38.504495 38.314731 -17.596659 32 Q A 2 0.50000 0.50000 "GLN " " C  " "    " 6 0 0 0 A0A0A0  C15  0 <> 1 0 0 0 0 0 0 <> <> 0 18 <> 0 0 1 <> <> <> <> <>
  19 15 39.436167 38.827706 -18.224189 32 Q A 70 -0.50000 -0.50000 "GLN " " O  " "    " 8 0 0 0 FF2F2F  O16  0 <> 1 0 0 0 0 0 0 <> <> 0 19 <> 0 0 1 <> <> <> <> <>
  20 3 37.587541 37.332683 -15.340640 32 Q A 2 -0.12000 -0.12000 "GLN " " CB " "    " 6 0 0 0 A0A0A0  C17  0 <> 1 0 0 0 0 0 0 <> <> 0 20 <> 0 0 1 <> <> <> <> <>
  21 3 37.968688 36.891990 -13.917041 32 Q A 2 -0.12000 -0.12000 "GLN " " CG " "    " 6 0 0 0 A0A0A0  C18  0 <> 1 0 0 0 0 0 0 <> <> 0 21 <> 0 0 1 <> <> <> <> <>
  22 2 37.343022 37.767878 -12.838053 32 Q A 2 0.50000 0.50000 "GLN " " CD " "    " 6 0 0 0 A0A0A0  C19  0 <> 1 0 0 0 0 0 0 <> <> 0 22 <> 0 0 1 <> <> <> <> <>
  23 15 36.142220 37.702713 -12.647784 32 Q A 70 -0.50000 -0.50000 "GLN " " OE1" "    " 8 0 0 0 FF2F2F  O20  0 <> 1 0 0 0 0 0 0 <> <> 0 23 <> 0 0 1 <> <> <> <> <>
  24 25 38.106076 38.476926 -12.013316 32 Q A 43 -0.76000 -0.76000 "GLN " " NE2" "    " 7 0 0 0 5757FF  N21  0 <> 1 0 0 0 0 0 0 <> <> 0 24 <> 0 0 1 <> <> <> <> <>
  25 43 38.745761 40.023008 -15.966761 32 Q A 21 0.30000 0.30000 "GLN " " H  " "    " 1 0 0 0 FFFFFF  H22  0 <> 1 0 0 0 0 0 0 <> <> 0 25 <> 0 0 1 <> <> <> <> <>
  26 41 39.576585 37.256931 -16.137659 32 Q A 21 0.06000 0.06000 "GLN " " HA " "    " 1 0 0 0 FFFFFF  H23  0 <> 1 0 0 0 0 0 0 <> <> 0 26 <> 0 0 1 <> <> <> <> <>
  27 41 36.730511 38.010663 -15.325458 32 Q A 21 0.06000 0.06000 "GLN " "1HB " "    " 1 0 0 0 FFFFFF  H24  0 <> 1 0 0 0 0 0 0 <> <> 0 27 <> 0 0 1 <> <> <> <> <>
  28 41 37.249797 36.448850 -15.883841 32 Q A 21 0.06000 0.06000 "GLN " "2HB " "    " 1 0 0 0 FFFFFF  H25  0 <> 1 0 0 0 0 0 0 <> <> 0 28 <> 0 0 1 <> <> <> <> <>
  29 41 37.557717 35.893065 -13.766720 32 Q A 21 0.06000 0.06000 "GLN " "1HG " "    " 1 0 0 0 FFFFFF  H26  0 <> 1 0 0 0 0 0 0 <> <> 0 29 <> 0 0 1 <> <> <> <> <>
  30 41 39.040741 36.779205 -13.793412 32 Q A 21 0.06000 0.06000 "GLN " "2HG " "    " 1 0 0 0 FFFFFF  H27  0 <> 1 0 0 0 0 0 0 <> <> 0 30 <> 0 0 1 <> <> <> <> <>
  31 43 37.628398 38.952990 -11.225329 32 Q A 21 0.38000 0.38000 "GLN " "1HE2" "    " 1 0 0 0 FFFFFF  H28  0 <> 1 0 0 0 0 0 0 <> <> 0 31 <> 0 0 1 <> <> <> <> <>
  32 43 39.075502 38.752167 -12.181487 32 Q A 21 0.38000 0.38000 "GLN " "2HE2" "    " 1 0 0 0 FFFFFF  H29  0 <> 1 0 0 0 0 0 0 <> <> 0 32 <> 0 0 1 <> <> <> <> <>
  33 25 37.282895 38.156058 -18.117097 33 D A 43 -0.50000 -0.50000 "ASP " " N  " "    " 7 0 0 0 5757FF  N30  0 <> 1 0 0 0 0 0 0 <> <> 0 33 <> 0 0 1 <> <> <> <> <>
  34 3 36.818832 38.874802 -19.306487 33 D A 2 0.14000 0.14000 "ASP " " CA " "    " 6 0 0 0 A0A0A0  C31  0 <> 1 0 0 0 0 0 0 <> <> 0 34 <> 0 0 1 <> <> <> <> <>
  35 2 36.424430 40.319105 -18.886142 33 D A 2 0.50000 0.50000 "ASP " " C  " "    " 6 0 0 0 A0A0A0  C32  0 <> 1 0 0 0 0 0 0 <> <> 0 35 <> 0 0 1 <> <> <> <> <>
  36 15 36.798628 40.802284 -17.810600 33 D A 70 -0.50000 -0.50000 "ASP " " O  " "    " 8 0 0 0 FF2F2F  O33  0 <> 1 0 0 0 0 0 0 <> <> 0 36 <> 0 0 1 <> <> <> <> <>
  37 3 35.637270 38.085386 -19.933941 33 D A 2 -0.22000 -0.22000 "ASP " " CB " "    " 6 0 0 0 A0A0A0  C34  0 <> 1 0 0 0 0 0 0 <> <> 0 37 <> 0 0 1 <> <> <> <> <>
  38 2 35.292946 38.481164 -21.366521 33 D A 2 0.70000 0.70000 "ASP " " CG " "    " 6 0 0 0 A0A0A0  C35  0 <> 1 0 0 0 0 0 0 <> <> 0 38 <> 0 0 1 <> <> <> <> <>
  39 18 35.739907 37.799477 -22.308312 33 D A 70 -0.80000 -0.80000 "ASP " " OD2" "    " 8 -1 0 0 FF2F2F  O36  0 <> 1 0 0 0 0 0 0 <> <> 0 39 <> 0 0 1 <> <> <> <> <>
  40 15 34.531057 39.462739 -21.519155 33 D A 70 -0.80000 -0.80000 "ASP " " OD1" "    " 8 0 0 0 FF2F2F  O37  0 <> 1 0 0 0 0 0 0 <> <> 0 40 <> 0 0 1 <> <> <> <> <>
  41 43 36.527895 37.722011 -17.561307 33 D A 21 0.30000 0.30000 "ASP " " H  " "    " 1 0 0 0 FFFFFF  H38  0 <> 1 0 0 0 0 0 0 <> <> 0 41 <> 0 0 1 <> <> <> <> <>
  42 41 37.627240 38.934213 -20.037686 33 D A 21 0.06000 0.06000 "ASP " " HA " "    " 1 0 0 0 FFFFFF  H39  0 <> 1 0 0 0 0 0 0 <> <> 0 42 <> 0 0 1 <> <> <> <> <>
  43 41 35.870305 37.020330 -19.940125 33 D A 21 0.06000 0.06000 "ASP " "1HB " "    " 1 0 0 0 FFFFFF  H40  0 <> 1 0 0 0 0 0 0 <> <> 0 43 <> 0 0 1 <> <> <> <> <>
  44 41 34.742102 38.184777 -19.322204 33 D A 21 0.06000 0.06000 "ASP " "2HB " "    " 1 0 0 0 FFFFFF  H41  0 <> 1 0 0 0 0 0 0 <> <> 0 44 <> 0 0 1 <> <> <> <> <>
  45 25 35.714782 41.038334 -19.753647 34 V A 43 -0.50000 -0.50000 "VAL " " N  " "    " 7 0 0 0 5757FF  N42  0 <> 1 0 0 0 0 0 0 <> <> 0 45 <> 0 0 1 <> <> <> <> <>
  46 3 35.292026 42.424847 -19.623521 34 V A 2 0.14000 0.14000 "VAL " " CA " "    " 6 0 0 0 A0A0A0  C43  0 <> 1 0 0 0 0 0 0 <> <> 0 46 <> 0 0 1 <> <> <> <> <>
  47 2 33.872484 42.663913 -20.177195 34 V A 2 0.50000 0.50000 "VAL " " C  " "    " 6 0 0 0 A0A0A0  C44  0 <> 1 0 0 0 0 0 0 <> <> 0 47 <> 0 0 1 <> <> <> <> <>
  48 15 33.270143 43.683986 -19.844239 34 V A 70 -0.50000 -0.50000 "VAL " " O  " "    " 8 0 0 0 FF2F2F  O45  0 <> 1 0 0 0 0 0 0 <> <> 0 48 <> 0 0 1 <> <> <> <> <>
  49 3 36.366421 43.386507 -20.216394 34 V A 2 -0.06000 -0.06000 "VAL " " CB " "    " 6 0 0 0 A0A0A0  C46  0 <> 1 0 0 0 0 0 0 <> <> 0 49 <> 0 0 1 <> <> <> <> <>
  50 3 37.611420 43.520613 -19.322111 34 V A 2 -0.18000 -0.18000 "VAL " " CG1" "    " 6 0 0 0 A0A0A0  C47  0 <> 1 0 0 0 0 0 0 <> <> 0 50 <> 0 0 1 <> <> <> <> <>
  51 3 36.786352 43.015772 -21.653672 34 V A 2 -0.18000 -0.18000 "VAL " " CG2" "    " 6 0 0 0 A0A0A0  C48  0 <> 1 0 0 0 0 0 0 <> <> 0 51 <> 0 0 1 <> <> <> <> <>
  52 43 35.357403 40.511912 -20.559415 34 V A 21 0.30000 0.30000 "VAL " " H  " "    " 1 0 0 0 FFFFFF  H49  0 <> 1 0 0 0 0 0 0 <> <> 0 52 <> 0 0 1 <> <> <> <> <>
  53 41 35.197301 42.645932 -18.558090 34 V A 21 0.06000 0.06000 "VAL " " HA " "    " 1 0 0 0 FFFFFF  H50  0 <> 1 0 0 0 0 0 0 <> <> 0 53 <> 0 0 1 <> <> <> <> <>
  54 41 35.921166 44.380085 -20.262593 34 V A 21 0.06000 0.06000 "VAL " " HB " "    " 1 0 0 0 FFFFFF  H51  0 <> 1 0 0 0 0 0 0 <> <> 0 54 <> 0 0 1 <> <> <> <> <>
  55 41 38.288717 44.281107 -19.705470 34 V A 21 0.06000 0.06000 "VAL " "1HG1" "    " 1 0 0 0 FFFFFF  H52  0 <> 1 0 0 0 0 0 0 <> <> 0 55 <> 0 0 1 <> <> <> <> <>
  56 41 37.338002 43.795807 -18.302813 34 V A 21 0.06000 0.06000 "VAL " "2HG1" "    " 1 0 0 0 FFFFFF  H53  0 <> 1 0 0 0 0 0 0 <> <> 0 56 <> 0 0 1 <> <> <> <> <>
  57 41 38.176198 42.589725 -19.269985 34 V A 21 0.06000 0.06000 "VAL " "3HG1" "    " 1 0 0 0 FFFFFF  H54  0 <> 1 0 0 0 0 0 0 <> <> 0 57 <> 0 0 1 <> <> <> <> <>
  58 41 37.463868 43.759173 -22.072401 34 V A 21 0.06000 0.06000 "VAL " "1HG2" "    " 1 0 0 0 FFFFFF  H55  0 <> 1 0 0 0 0 0 0 <> <> 0 58 <> 0 0 1 <> <> <> <> <>
  59 41 37.303270 42.055573 -21.683370 34 V A 21 0.06000 0.06000 "VAL " "2HG2" "    " 1 0 0 0 FFFFFF  H56  0 <> 1 0 0 0 0 0 0 <> <> 0 59 <> 0 0 1 <> <> <> <> <>
  60 41 35.926744 42.939982 -22.318315 34 V A 21 0.06000 0.06000 "VAL " "3HG2" "    " 1 0 0 0 FFFFFF  H57  0 <> 1 0 0 0 0 0 0 <> <> 0 60 <> 0 0 1 <> <> <> <> <>
  61 25 33.345182 41.780173 -21.032317 35 V A 43 -0.50000 -0.50000 "VAL " " N  " "    " 7 0 0 0 5757FF  N58  0 <> 1 0 0 0 0 0 0 <> <> 0 61 <> 0 0 1 <> <> <> <> <>
  62 3 32.073638 41.910903 -21.744611 35 V A 2 0.14000 0.14000 "VAL " " CA " "    " 6 0 0 0 A0A0A0  C59  0 <> 1 0 0 0 0 0 0 <> <> 0 62 <> 0 0 1 <> <> <> <> <>
  63 2 31.206530 40.646023 -21.584322 35 V A 2 0.50000 0.50000 "VAL " " C  " "    " 6 0 0 0 A0A0A0  C60  0 <> 1 0 0 0 0 0 0 <> <> 0 63 <> 0 0 1 <> <> <> <> <>
  64 15 29.979994 40.738729 -21.671959 35 V A 70 -0.50000 -0.50000 "VAL " " O  " "    " 8 0 0 0 FF2F2F  O61  0 <> 1 0 0 0 0 0 0 <> <> 0 64 <> 0 0 1 <> <> <> <> <>
  65 3 32.346259 42.354672 -23.217322 35 V A 2 -0.06000 -0.06000 "VAL " " CB " "    " 6 0 0 0 A0A0A0  C62  0 <> 1 0 0 0 0 0 0 <> <> 0 65 <> 0 0 1 <> <> <> <> <>
  66 3 31.137228 42.208338 -24.162251 35 V A 2 -0.18000 -0.18000 "VAL " " CG1" "    " 6 0 0 0 A0A0A0  C63  0 <> 1 0 0 0 0 0 0 <> <> 0 66 <> 0 0 1 <> <> <> <> <>
  67 3 32.882934 43.798769 -23.292087 35 V A 2 -0.18000 -0.18000 "VAL " " CG2" "    " 6 0 0 0 A0A0A0  C64  0 <> 1 0 0 0 0 0 0 <> <> 0 67 <> 0 0 1 <> <> <> <> <>
  68 43 33.872097 40.918936 -21.234716 35 V A 21 0.30000 0.30000 "VAL " " H  " "    " 1 0 0 0 FFFFFF  H65  0 <> 1 0 0 0 0 0 0 <> <> 0 68 <> 0 0 1 <> <> <> <> <>
  69 41 31.480200 42.695497 -21.272529 35 V A 21 0.06000 0.06000 "VAL " " HA " "    " 1 0 0 0 FFFFFF  H66  0 <> 1 0 0 0 0 0 0 <> <> 0 69 <> 0 0 1 <> <> <> <> <>
  70 41 33.122339 41.697084 -23.614600 35 V A 21 0.06000 0.06000 "VAL " " HB " "    " 1 0 0 0 FFFFFF  H67  0 <> 1 0 0 0 0 0 0 <> <> 0 70 <> 0 0 1 <> <> <> <> <>
  71 41 31.348202 42.610055 -25.151985 35 V A 21 0.06000 0.06000 "VAL " "1HG1" "    " 1 0 0 0 FFFFFF  H68  0 <> 1 0 0 0 0 0 0 <> <> 0 71 <> 0 0 1 <> <> <> <> <>
  72 41 30.864021 41.161706 -24.301690 35 V A 21 0.06000 0.06000 "VAL " "2HG1" "    " 1 0 0 0 FFFFFF  H69  0 <> 1 0 0 0 0 0 0 <> <> 0 72 <> 0 0 1 <> <> <> <> <>
  73 41 30.262390 42.724372 -23.770013 35 V A 21 0.06000 0.06000 "VAL " "3HG1" "    " 1 0 0 0 FFFFFF  H70  0 <> 1 0 0 0 0 0 0 <> <> 0 73 <> 0 0 1 <> <> <> <> <>
  74 41 33.052119 44.110303 -24.322712 35 V A 21 0.06000 0.06000 "VAL " "1HG2" "    " 1 0 0 0 FFFFFF  H71  0 <> 1 0 0 0 0 0 0 <> <> 0 74 <> 0 0 1 <> <> <> <> <>
  75 41 32.181442 44.496841 -22.836707 35 V A 21 0.06000 0.06000 "VAL " "2HG2" "    " 1 0 0 0 FFFFFF  H72  0 <> 1 0 0 0 0 0 0 <> <> 0 75 <> 0 0 1 <> <> <> <> <>
  76 41 33.831182 43.902557 -22.767456 35 V A 21 0.06000 0.06000 "VAL " "3HG2" "    " 1 0 0 0 FFFFFF  H73  0 <> 1 0 0 0 0 0 0 <> <> 0 76 <> 0 0 1 <> <> <> <> <>
  77 25 31.818567 39.475930 -21.359284 36 Q A 43 -0.50000 -0.50000 "GLN " " N  " "    " 7 0 0 0 5757FF  N74  0 <> 1 0 0 0 0 0 0 <> <> 0 77 <> 0 0 1 <> <> <> <> <>
  78 3 31.114832 38.227239 -21.069501 36 Q A 2 0.14000 0.14000 "GLN " " CA " "    " 6 0 0 0 A0A0A0  C75  0 <> 1 0 0 0 0 0 0 <> <> 0 78 <> 0 0 1 <> <> <> <> <>
  79 2 30.895222 38.093964 -19.551197 36 Q A 2 0.50000 0.50000 "GLN " " C  " "    " 6 0 0 0 A0A0A0  C76  0 <> 1 0 0 0 0 0 0 <> <> 0 79 <> 0 0 1 <> <> <> <> <>
  80 15 29.837235 37.630010 -19.123882 36 Q A 70 -0.50000 -0.50000 "GLN " " O  " "    " 8 0 0 0 FF2F2F  O77  0 <> 1 0 0 0 0 0 0 <> <> 0 80 <> 0 0 1 <> <> <> <> <>
  81 3 31.974963 37.034307 -21.538891 36 Q A 2 -0.12000 -0.12000 "GLN " " CB " "    " 6 0 0 0 A0A0A0  C78  0 <> 1 0 0 0 0 0 0 <> <> 0 81 <> 0 0 1 <> <> <> <> <>
  82 3 32.332328 37.092789 -23.037627 36 Q A 2 -0.12000 -0.12000 "GLN " " CG " "    " 6 0 0 0 A0A0A0  C79  0 <> 1 0 0 0 0 0 0 <> <> 0 82 <> 0 0 1 <> <> <> <> <>
  83 2 33.062490 35.834395 -23.492819 36 Q A 2 0.50000 0.50000 "GLN " " CD " "    " 6 0 0 0 A0A0A0  C80  0 <> 1 0 0 0 0 0 0 <> <> 0 83 <> 0 0 1 <> <> <> <> <>
  84 15 32.439408 34.865579 -23.916883 36 Q A 70 -0.50000 -0.50000 "GLN " " OE1" "    " 8 0 0 0 FF2F2F  O81  0 <> 1 0 0 0 0 0 0 <> <> 0 84 <> 0 0 1 <> <> <> <> <>
  85 25 34.386259 35.834924 -23.434987 36 Q A 43 -0.76000 -0.76000 "GLN " " NE2" "    " 7 0 0 0 5757FF  N82  0 <> 1 0 0 0 0 0 0 <> <> 0 85 <> 0 0 1 <> <> <> <> <>
  86 43 32.844912 39.444150 -21.396414 36 Q A 21 0.30000 0.30000 "GLN " " H  " "    " 1 0 0 0 FFFFFF  H83  0 <> 1 0 0 0 0 0 0 <> <> 0 86 <> 0 0 1 <> <> <> <> <>
  87 41 30.147098 38.199221 -21.573763 36 Q A 21 0.06000 0.06000 "GLN " " HA " "    " 1 0 0 0 FFFFFF  H84  0 <> 1 0 0 0 0 0 0 <> <> 0 87 <> 0 0 1 <> <> <> <> <>
  88 41 32.891747 36.967183 -20.951033 36 Q A 21 0.06000 0.06000 "GLN " "1HB " "    " 1 0 0 0 FFFFFF  H85  0 <> 1 0 0 0 0 0 0 <> <> 0 88 <> 0 0 1 <> <> <> <> <>
  89 41 31.432228 36.108606 -21.337821 36 Q A 21 0.06000 0.06000 "GLN " "2HB " "    " 1 0 0 0 FFFFFF  H86  0 <> 1 0 0 0 0 0 0 <> <> 0 89 <> 0 0 1 <> <> <> <> <>
  90 41 31.424752 37.197649 -23.631899 36 Q A 21 0.06000 0.06000 "GLN " "1HG " "    " 1 0 0 0 FFFFFF  H87  0 <> 1 0 0 0 0 0 0 <> <> 0 90 <> 0 0 1 <> <> <> <> <>
  91 41 32.950611 37.963537 -23.259351 36 Q A 21 0.06000 0.06000 "GLN " "2HG " "    " 1 0 0 0 FFFFFF  H88  0 <> 1 0 0 0 0 0 0 <> <> 0 91 <> 0 0 1 <> <> <> <> <>
  92 43 34.898055 35.015225 -23.696532 36 Q A 21 0.38000 0.38000 "GLN " "1HE2" "    " 1 0 0 0 FFFFFF  H89  0 <> 1 0 0 0 0 0 0 <> <> 0 92 <> 0 0 1 <> <> <> <> <>
  93 43 34.899916 36.648460 -23.026819 36 Q A 21 0.38000 0.38000 "GLN " "2HE2" "    " 1 0 0 0 FFFFFF  H90  0 <> 1 0 0 0 0 0 0 <> <> 0 93 <> 0 0 1 <> <> <> <> <>
  94 25 31.872550 38.526406 -18.739551 37 D A 43 -0.50000 -0.50000 "ASP " " N  " "    " 7 0 0 0 5757FF  N91  0 <> 1 0 0 0 0 0 0 <> <> 0 94 <> 0 0 1 <> <> <> <> <>
  95 3 31.827157 38.489337 -17.275178 37 D A 2 0.14000 0.14000 "ASP " " CA " "    " 6 0 0 0 A0A0A0  C92  0 <> 1 0 0 0 0 0 0 <> <> 0 95 <> 0 0 1 <> <> <> <> <>
  96 2 30.995078 39.665646 -16.743998 37 D A 2 0.50000 0.50000 "ASP " " C  " "    " 6 0 0 0 A0A0A0  C93  0 <> 1 0 0 0 0 0 0 <> <> 0 96 <> 0 0 1 <> <> <> <> <>
  97 15 31.517400 40.670550 -16.257625 37 D A 70 -0.50000 -0.50000 "ASP " " O  " "    " 8 0 0 0 FF2F2F  O94  0 <> 1 0 0 0 0 0 0 <> <> 0 97 <> 0 0 1 <> <> <> <> <>
  98 3 33.253162 38.529849 -16.659284 37 D A 2 -0.22000 -0.22000 "ASP " " CB " "    " 6 0 0 0 A0A0A0  C95  0 <> 1 0 0 0 0 0 0 <> <> 0 98 <> 0 0 1 <> <> <> <> <>
  99 2 33.907546 37.157850 -16.550286 37 D A 2 0.70000 0.70000 "ASP " " CG " "    " 6 0 0 0 A0A0A0  C96  0 <> 1 0 0 0 0 0 0 <> <> 0 99 <> 0 0 1 <> <> <> <> <>
  100 18 33.264672 36.257031 -15.964344 37 D A 70 -0.80000 -0.80000 "ASP " " OD1" "    " 8 -1 0 0 FF2F2F  O97  0 <> 1 0 0 0 0 0 0 <> <> 0 100 <> 0 0 1 <> <> <> <> <>
  101 15 35.066917 37.032629 -16.996914 37 D A 70 -0.80000 -0.80000 "ASP " " OD2" "    " 8 0 0 0 FF2F2F  O98  0 <> 1 0 0 0 0 0 0 <> <> 0 101 <> 0 0 1 <> <> <> <> <>
  102 43 32.692234 38.925481 -19.168396 37 D A 21 0.30000 0.30000 "ASP " " H  " "    " 1 0 0 0 FFFFFF  H99  0 <> 1 0 0 0 0 0 0 <> <> 0 102 <> 0 0 1 <> <> <> <> <>
  103 41 31.328791 37.572973 -16.949848 37 D A 21 0.06000 0.06000 "ASP " " HA " "    " 1 0 0 0 FFFFFF  H100  0 <> 1 0 0 0 0 0 0 <> <> 0 103 <> 0 0 1 <> <> <> <> <>
  104 41 33.900669 39.214409 -17.207233 37 D A 21 0.06000 0.06000 "ASP " "1HB " "    " 1 0 0 0 FFFFFF  H101  0 <> 1 0 0 0 0 0 0 <> <> 0 104 <> 0 0 1 <> <> <> <> <>
  105 41 33.227675 38.907958 -15.637095 37 D A 21 0.06000 0.06000 "ASP " "2HB " "    " 1 0 0 0 FFFFFF  H102  0 <> 1 0 0 0 0 0 0 <> <> 0 105 <> 0 0 1 <> <> <> <> <>
  106 25 29.669114 39.490130 -16.772045 38 V A 43 -0.50000 -0.50000 "VAL " " N  " "    " 7 0 0 0 5757FF  N103  0 <> 1 0 0 0 0 0 0 <> <> 0 106 <> 0 0 1 <> <> <> <> <>
  107 3 28.736962 40.159004 -15.868771 38 V A 2 0.14000 0.14000 "VAL " " CA " "    " 6 0 0 0 A0A0A0  C104  0 <> 1 0 0 0 0 0 0 <> <> 0 107 <> 0 0 1 <> <> <> <> <>
  108 2 28.878354 39.400133 -14.529055 38 V A 2 0.50000 0.50000 "VAL " " C  " "    " 6 0 0 0 A0A0A0  C105  0 <> 1 0 0 0 0 0 0 <> <> 0 108 <> 0 0 1 <> <> <> <> <>
  109 15 28.637189 38.190034 -14.530599 38 V A 70 -0.50000 -0.50000 "VAL " " O  " "    " 8 0 0 0 FF2F2F  O106  0 <> 1 0 0 0 0 0 0 <> <> 0 109 <> 0 0 1 <> <> <> <> <>
  110 3 27.281480 40.006987 -16.404469 38 V A 2 -0.06000 -0.06000 "VAL " " CB " "    " 6 0 0 0 A0A0A0  C107  0 <> 1 0 0 0 0 0 0 <> <> 0 110 <> 0 0 1 <> <> <> <> <>
  111 3 26.228628 40.613153 -15.452199 38 V A 2 -0.18000 -0.18000 "VAL " " CG1" "    " 6 0 0 0 A0A0A0  C108  0 <> 1 0 0 0 0 0 0 <> <> 0 111 <> 0 0 1 <> <> <> <> <>
  112 3 27.108845 40.619266 -17.802763 38 V A 2 -0.18000 -0.18000 "VAL " " CG2" "    " 6 0 0 0 A0A0A0  C109  0 <> 1 0 0 0 0 0 0 <> <> 0 112 <> 0 0 1 <> <> <> <> <>
  113 43 29.353427 38.641456 -17.226028 38 V A 21 0.30000 0.30000 "VAL " " H  " "    " 1 0 0 0 FFFFFF  H110  0 <> 1 0 0 0 0 0 0 <> <> 0 113 <> 0 0 1 <> <> <> <> <>
  114 41 28.987051 41.216944 -15.794121 38 V A 21 0.06000 0.06000 "VAL " " HA " "    " 1 0 0 0 FFFFFF  H111  0 <> 1 0 0 0 0 0 0 <> <> 0 114 <> 0 0 1 <> <> <> <> <>
  115 41 27.058269 38.941669 -16.496178 38 V A 21 0.06000 0.06000 "VAL " " HB " "    " 1 0 0 0 FFFFFF  H112  0 <> 1 0 0 0 0 0 0 <> <> 0 115 <> 0 0 1 <> <> <> <> <>
  116 41 25.226168 40.542483 -15.874794 38 V A 21 0.06000 0.06000 "VAL " "1HG1" "    " 1 0 0 0 FFFFFF  H113  0 <> 1 0 0 0 0 0 0 <> <> 0 116 <> 0 0 1 <> <> <> <> <>
  117 41 26.199304 40.092769 -14.493326 38 V A 21 0.06000 0.06000 "VAL " "2HG1" "    " 1 0 0 0 FFFFFF  H114  0 <> 1 0 0 0 0 0 0 <> <> 0 117 <> 0 0 1 <> <> <> <> <>
  118 41 26.432638 41.663710 -15.249170 38 V A 21 0.06000 0.06000 "VAL " "3HG1" "    " 1 0 0 0 FFFFFF  H115  0 <> 1 0 0 0 0 0 0 <> <> 0 118 <> 0 0 1 <> <> <> <> <>
  119 41 26.107152 40.438810 -18.192021 38 V A 21 0.06000 0.06000 "VAL " "1HG2" "    " 1 0 0 0 FFFFFF  H116  0 <> 1 0 0 0 0 0 0 <> <> 0 119 <> 0 0 1 <> <> <> <> <>
  120 41 27.265844 41.695417 -17.766981 38 V A 21 0.06000 0.06000 "VAL " "2HG2" "    " 1 0 0 0 FFFFFF  H117  0 <> 1 0 0 0 0 0 0 <> <> 0 120 <> 0 0 1 <> <> <> <> <>
  121 41 27.814641 40.195487 -18.518965 38 V A 21 0.06000 0.06000 "VAL " "3HG2" "    " 1 0 0 0 FFFFFF  H118  0 <> 1 0 0 0 0 0 0 <> <> 0 121 <> 0 0 1 <> <> <> <> <>
  122 25 29.307115 40.043795 -13.418165 39 P A 43 -0.14000 -0.14000 "PRO " " N  " "    " 7 0 0 0 5757FF  N119  0 <> 1 0 0 0 0 0 0 <> <> 0 122 <> 0 0 1 <> <> <> <> <>
  123 3 29.504778 39.364737 -12.133048 39 P A 2 0.01000 0.01000 "PRO " " CA " "    " 6 0 0 0 A0A0A0  C120  0 <> 1 0 0 0 0 0 0 <> <> 0 123 <> 0 0 1 <> <> <> <> <>
  124 2 28.258189 38.621337 -11.624829 39 P A 2 0.50000 0.50000 "PRO " " C  " "    " 6 0 0 0 A0A0A0  C121  0 <> 1 0 0 0 0 0 0 <> <> 0 124 <> 0 0 1 <> <> <> <> <>
  125 15 27.184720 39.213674 -11.512148 39 P A 70 -0.50000 -0.50000 "PRO " " O  " "    " 8 0 0 0 FF2F2F  O122  0 <> 1 0 0 0 0 0 0 <> <> 0 125 <> 0 0 1 <> <> <> <> <>
  126 3 29.757354 41.435927 -13.354606 39 P A 2 -0.05000 -0.05000 "PRO " " CD " "    " 6 0 0 0 A0A0A0  C123  0 <> 1 0 0 0 0 0 0 <> <> 0 126 <> 0 0 1 <> <> <> <> <>
  127 3 29.889867 40.470172 -11.135253 39 P A 2 -0.12000 -0.12000 "PRO " " CB " "    " 6 0 0 0 A0A0A0  C124  0 <> 1 0 0 0 0 0 0 <> <> 0 127 <> 0 0 1 <> <> <> <> <>
  128 3 30.409121 41.612705 -11.982949 39 P A 2 -0.12000 -0.12000 "PRO " " CG " "    " 6 0 0 0 A0A0A0  C125  0 <> 1 0 0 0 0 0 0 <> <> 0 128 <> 0 0 1 <> <> <> <> <>
  129 41 30.464837 41.684058 -14.145757 39 P A 21 0.06000 0.06000 "PRO " "1HD " "    " 1 0 0 0 FFFFFF  H126  0 <> 1 0 0 0 0 0 0 <> <> 0 129 <> 0 0 1 <> <> <> <> <>
  130 41 28.892318 42.092351 -13.454262 39 P A 21 0.06000 0.06000 "PRO " "2HD " "    " 1 0 0 0 FFFFFF  H127  0 <> 1 0 0 0 0 0 0 <> <> 0 130 <> 0 0 1 <> <> <> <> <>
  131 41 30.328431 38.670594 -12.274990 39 P A 21 0.06000 0.06000 "PRO " " HA " "    " 1 0 0 0 FFFFFF  H128  0 <> 1 0 0 0 0 0 0 <> <> 0 131 <> 0 0 1 <> <> <> <> <>
  132 41 29.022591 40.826503 -10.577567 39 P A 21 0.06000 0.06000 "PRO " "1HB " "    " 1 0 0 0 FFFFFF  H129  0 <> 1 0 0 0 0 0 0 <> <> 0 132 <> 0 0 1 <> <> <> <> <>
  133 41 30.624593 40.130793 -10.404758 39 P A 21 0.06000 0.06000 "PRO " "2HB " "    " 1 0 0 0 FFFFFF  H130  0 <> 1 0 0 0 0 0 0 <> <> 0 133 <> 0 0 1 <> <> <> <> <>
  134 41 31.489343 41.514135 -12.082692 39 P A 21 0.06000 0.06000 "PRO " "1HG " "    " 1 0 0 0 FFFFFF  H131  0 <> 1 0 0 0 0 0 0 <> <> 0 134 <> 0 0 1 <> <> <> <> <>
  135 41 30.204123 42.582087 -11.533415 39 P A 21 0.06000 0.06000 "PRO " "2HG " "    " 1 0 0 0 FFFFFF  H132  0 <> 1 0 0 0 0 0 0 <> <> 0 135 <> 0 0 1 <> <> <> <> <>
  136 25 28.421252 37.348163 -11.252322 40 N A 43 -0.50000 -0.50000 "ASN " " N  " "    " 7 0 0 0 5757FF  N133  0 <> 1 0 0 0 0 0 0 <> <> 0 136 <> 0 0 1 <> <> <> <> <>
  137 3 27.438819 36.570243 -10.503511 40 N A 2 0.14000 0.14000 "ASN " " CA " "    " 6 0 0 0 A0A0A0  C134  0 <> 1 0 0 0 0 0 0 <> <> 0 137 <> 0 0 1 <> <> <> <> <>
  138 2 27.588288 37.004808 -9.032727 40 N A 2 0.50000 0.50000 "ASN " " C  " "    " 6 0 0 0 A0A0A0  C135  0 <> 1 0 0 0 0 0 0 <> <> 0 138 <> 0 0 1 <> <> <> <> <>
  139 15 28.408906 36.451362 -8.292376 40 N A 70 -0.50000 -0.50000 "ASN " " O  " "    " 8 0 0 0 FF2F2F  O136  0 <> 1 0 0 0 0 0 0 <> <> 0 139 <> 0 0 1 <> <> <> <> <>
  140 3 27.777124 35.067226 -10.663597 40 N A 2 -0.12000 -0.12000 "ASN " " CB " "    " 6 0 0 0 A0A0A0  C137  0 <> 1 0 0 0 0 0 0 <> <> 0 140 <> 0 0 1 <> <> <> <> <>
  141 2 26.714079 34.150497 -10.052243 40 N A 2 0.50000 0.50000 "ASN " " CG " "    " 6 0 0 0 A0A0A0  C138  0 <> 1 0 0 0 0 0 0 <> <> 0 141 <> 0 0 1 <> <> <> <> <>
  142 15 25.799085 33.702724 -10.731644 40 N A 70 -0.50000 -0.50000 "ASN " " OD1" "    " 8 0 0 0 FF2F2F  O139  0 <> 1 0 0 0 0 0 0 <> <> 0 142 <> 0 0 1 <> <> <> <> <>
  143 25 26.823476 33.842240 -8.765075 40 N A 43 -0.76000 -0.76000 "ASN " " ND2" "    " 7 0 0 0 5757FF  N140  0 <> 1 0 0 0 0 0 0 <> <> 0 143 <> 0 0 1 <> <> <> <> <>
  144 43 29.293803 36.880905 -11.495588 40 N A 21 0.30000 0.30000 "ASN " " H  " "    " 1 0 0 0 FFFFFF  H141  0 <> 1 0 0 0 0 0 0 <> <> 0 144 <> 0 0 1 <> <> <> <> <>
  145 41 26.428558 36.769006 -10.869262 40 N A 21 0.06000 0.06000 "ASN " " HA " "    " 1 0 0 0 FFFFFF  H142  0 <> 1 0 0 0 0 0 0 <> <> 0 145 <> 0 0 1 <> <> <> <> <>
  146 41 27.837183 34.828393 -11.726428 40 N A 21 0.06000 0.06000 "ASN " "1HB " "    " 1 0 0 0 FFFFFF  H143  0 <> 1 0 0 0 0 0 0 <> <> 0 146 <> 0 0 1 <> <> <> <> <>
  147 41 28.759971 34.824893 -10.256193 40 N A 21 0.06000 0.06000 "ASN " "2HB " "    " 1 0 0 0 FFFFFF  H144  0 <> 1 0 0 0 0 0 0 <> <> 0 147 <> 0 0 1 <> <> <> <> <>
  148 43 26.112314 33.263124 -8.348883 40 N A 21 0.38000 0.38000 "ASN " "1HD2" "    " 1 0 0 0 FFFFFF  H145  0 <> 1 0 0 0 0 0 0 <> <> 0 148 <> 0 0 1 <> <> <> <> <>
  149 43 27.544970 34.275292 -8.204499 40 N A 21 0.38000 0.38000 "ASN " "2HD2" "    " 1 0 0 0 FFFFFF  H146  0 <> 1 0 0 0 0 0 0 <> <> 0 149 <> 0 0 1 <> <> <> <> <>
  150 25 26.840737 38.038463 -8.642085 41 V A 43 -0.50000 -0.50000 "VAL " " N  " "    " 7 0 0 0 5757FF  N147  0 <> 1 0 0 0 0 0 0 <> <> 0 150 <> 0 0 1 <> <> <> <> <>
  151 3 26.788698 38.643670 -7.315449 41 V A 2 0.14000 0.14000 "VAL " " CA " "    " 6 0 0 0 A0A0A0  C148  0 <> 1 0 0 0 0 0 0 <> <> 0 151 <> 0 0 1 <> <> <> <> <>
  152 2 25.365724 38.533927 -6.754086 41 V A 2 0.50000 0.50000 "VAL " " C  " "    " 6 0 0 0 A0A0A0  C149  0 <> 1 0 0 0 0 0 0 <> <> 0 152 <> 0 0 1 <> <> <> <> <>
  153 15 24.397178 38.436622 -7.506137 41 V A 70 -0.50000 -0.50000 "VAL " " O  " "    " 8 0 0 0 FF2F2F  O150  0 <> 1 0 0 0 0 0 0 <> <> 0 153 <> 0 0 1 <> <> <> <> <>
  154 3 27.241994 40.130251 -7.383749 41 V A 2 -0.06000 -0.06000 "VAL " " CB " "    " 6 0 0 0 A0A0A0  C151  0 <> 1 0 0 0 0 0 0 <> <> 0 154 <> 0 0 1 <> <> <> <> <>
  155 3 28.767561 40.266741 -7.475848 41 V A 2 -0.18000 -0.18000 "VAL " " CG1" "    " 6 0 0 0 A0A0A0  C152  0 <> 1 0 0 0 0 0 0 <> <> 0 155 <> 0 0 1 <> <> <> <> <>
  156 3 26.551056 40.933445 -8.503201 41 V A 2 -0.18000 -0.18000 "VAL " " CG2" "    " 6 0 0 0 A0A0A0  C153  0 <> 1 0 0 0 0 0 0 <> <> 0 156 <> 0 0 1 <> <> <> <> <>
  157 43 26.186087 38.421522 -9.312829 41 V A 21 0.30000 0.30000 "VAL " " H  " "    " 1 0 0 0 FFFFFF  H154  0 <> 1 0 0 0 0 0 0 <> <> 0 157 <> 0 0 1 <> <> <> <> <>
  158 41 27.435712 38.096404 -6.631128 41 V A 21 0.06000 0.06000 "VAL " " HA " "    " 1 0 0 0 FFFFFF  H155  0 <> 1 0 0 0 0 0 0 <> <> 0 158 <> 0 0 1 <> <> <> <> <>
  159 41 26.958816 40.602311 -6.440548 41 V A 21 0.06000 0.06000 "VAL " " HB " "    " 1 0 0 0 FFFFFF  H156  0 <> 1 0 0 0 0 0 0 <> <> 0 159 <> 0 0 1 <> <> <> <> <>
  160 41 29.072365 41.305772 -7.569029 41 V A 21 0.06000 0.06000 "VAL " "1HG1" "    " 1 0 0 0 FFFFFF  H157  0 <> 1 0 0 0 0 0 0 <> <> 0 160 <> 0 0 1 <> <> <> <> <>
  161 41 29.233065 39.886609 -6.569120 41 V A 21 0.06000 0.06000 "VAL " "2HG1" "    " 1 0 0 0 FFFFFF  H158  0 <> 1 0 0 0 0 0 0 <> <> 0 161 <> 0 0 1 <> <> <> <> <>
  162 41 29.172050 39.717014 -8.325792 41 V A 21 0.06000 0.06000 "VAL " "3HG1" "    " 1 0 0 0 FFFFFF  H159  0 <> 1 0 0 0 0 0 0 <> <> 0 162 <> 0 0 1 <> <> <> <> <>
  163 41 26.743094 41.997059 -8.397236 41 V A 21 0.06000 0.06000 "VAL " "1HG2" "    " 1 0 0 0 FFFFFF  H160  0 <> 1 0 0 0 0 0 0 <> <> 0 163 <> 0 0 1 <> <> <> <> <>
  164 41 26.891669 40.638057 -9.491690 41 V A 21 0.06000 0.06000 "VAL " "2HG2" "    " 1 0 0 0 FFFFFF  H161  0 <> 1 0 0 0 0 0 0 <> <> 0 164 <> 0 0 1 <> <> <> <> <>
  165 41 25.467388 40.811162 -8.479884 41 V A 21 0.06000 0.06000 "VAL " "3HG2" "    " 1 0 0 0 FFFFFF  H162  0 <> 1 0 0 0 0 0 0 <> <> 0 165 <> 0 0 1 <> <> <> <> <>
  166 25 25.259339 38.599880 -5.426167 42 D A 43 -0.50000 -0.50000 "ASP " " N  " "    " 7 0 0 0 5757FF  N163  0 <> 1 0 0 0 0 0 0 <> <> 0 166 <> 0 0 1 <> <> <> <> <>
  167 3 24.027096 38.556488 -4.638242 42 D A 2 0.14000 0.14000 "ASP " " CA " "    " 6 0 0 0 A0A0A0  C164  0 <> 1 0 0 0 0 0 0 <> <> 0 167 <> 0 0 1 <> <> <> <> <>
  168 2 23.330673 39.930573 -4.615472 42 D A 2 0.50000 0.50000 "ASP " " C  " "    " 6 0 0 0 A0A0A0  C165  0 <> 1 0 0 0 0 0 0 <> <> 0 168 <> 0 0 1 <> <> <> <> <>
  169 15 22.174414 40.024892 -4.199982 42 D A 70 -0.50000 -0.50000 "ASP " " O  " "    " 8 0 0 0 FF2F2F  O166  0 <> 1 0 0 0 0 0 0 <> <> 0 169 <> 0 0 1 <> <> <> <> <>
  170 3 24.336220 38.209511 -3.152795 42 D A 2 -0.22000 -0.22000 "ASP " " CB " "    " 6 0 0 0 A0A0A0  C167  0 <> 1 0 0 0 0 0 0 <> <> 0 170 <> 0 0 1 <> <> <> <> <>
  171 2 25.394528 37.146680 -2.872216 42 D A 2 0.70000 0.70000 "ASP " " CG " "    " 6 0 0 0 A0A0A0  C168  0 <> 1 0 0 0 0 0 0 <> <> 0 171 <> 0 0 1 <> <> <> <> <>
  172 18 25.115830 36.288440 -2.015513 42 D A 70 -0.80000 -0.80000 "ASP " " OD1" "    " 8 -1 0 0 FF2F2F  O169  0 <> 1 0 0 0 0 0 0 <> <> 0 172 <> 0 0 1 <> <> <> <> <>
  173 15 26.534583 37.288682 -3.380612 42 D A 70 -0.80000 -0.80000 "ASP " " OD2" "    " 8 0 0 0 FF2F2F  O170  0 <> 1 0 0 0 0 0 0 <> <> 0 173 <> 0 0 1 <> <> <> <> <>
  174 43 26.103015 38.548616 -4.861818 42 D A 21 0.30000 0.30000 "ASP " " H  " "    " 1 0 0 0 FFFFFF  H171  0 <> 1 0 0 0 0 0 0 <> <> 0 174 <> 0 0 1 <> <> <> <> <>
  175 41 23.354224 37.809160 -5.061941 42 D A 21 0.06000 0.06000 "ASP " " HA " "    " 1 0 0 0 FFFFFF  H172  0 <> 1 0 0 0 0 0 0 <> <> 0 175 <> 0 0 1 <> <> <> <> <>
  176 41 24.676227 39.098821 -2.620195 42 D A 21 0.06000 0.06000 "ASP " "1HB " "    " 1 0 0 0 FFFFFF  H173  0 <> 1 0 0 0 0 0 0 <> <> 0 176 <> 0 0 1 <> <> <> <> <>
  177 41 23.410554 37.900031 -2.668010 42 D A 21 0.06000 0.06000 "ASP " "2HB " "    " 1 0 0 0 FFFFFF  H174  0 <> 1 0 0 0 0 0 0 <> <> 0 177 <> 0 0 1 <> <> <> <> <>
  178 25 24.061547 40.985030 -4.998736 43 V A 43 -0.50000 -0.50000 "VAL " " N  " "    " 7 0 0 0 5757FF  N175  2 <> 1 0 0 0 0 0 0 <> <> 0 178 <> 0 0 1 <> <> <> <> <>
  179 3 23.624145 42.355841 -5.217954 43 V A 2 0.14000 0.14000 "VAL " " CA " "    " 6 0 0 0 A0A0A0  C176  2 <> 1 0 0 0 0 0 0 <> <> 0 179 <> 0 0 1 <> <> <> <> <>
  180 2 24.415270 42.873160 -6.424208 43 V A 2 0.50000 0.50000 "VAL " " C  " "    " 6 0 0 0 A0A0A0  C177  2 <> 1 0 0 0 0 0 0 <> <> 0 180 <> 0 0 1 <> <> <> <> <>
  181 15 25.639974 43.013201 -6.324651 43 V A 70 -0.50000 -0.50000 "VAL " " O  " "    " 8 0 0 0 FF2F2F  O178  2 <> 1 0 0 0 0 0 0 <> <> 0 181 <> 0 0 1 <> <> <> <> <>
  182 3 23.889183 43.236188 -3.962330 43 V A 2 -0.06000 -0.06000 "VAL " " CB " "    " 6 0 0 0 A0A0A0  C179  2 <> 1 0 0 0 0 0 0 <> <> 0 182 <> 0 0 1 <> <> <> <> <>
  183 3 23.464706 44.700211 -4.183294 43 V A 2 -0.18000 -0.18000 "VAL " " CG1" "    " 6 0 0 0 A0A0A0  C180  2 <> 1 0 0 0 0 0 0 <> <> 0 183 <> 0 0 1 <> <> <> <> <>
  184 3 23.266507 42.695386 -2.672508 43 V A 2 -0.18000 -0.18000 "VAL " " CG2" "    " 6 0 0 0 A0A0A0  C181  2 <> 1 0 0 0 0 0 0 <> <> 0 184 <> 0 0 1 <> <> <> <> <>
  185 43 25.017160 40.785297 -5.251666 43 V A 21 0.30000 0.30000 "VAL " " H  " "    " 1 0 0 0 FFFFFF  H182  2 <> 1 0 0 0 0 0 0 <> <> 0 185 <> 0 0 1 <> <> <> <> <>
  186 41 22.557797 42.363685 -5.458717 43 V A 21 0.06000 0.06000 "VAL " " HA " "    " 1 0 0 0 FFFFFF  H183  2 <> 1 0 0 0 0 0 0 <> <> 0 186 <> 0 0 1 <> <> <> <> <>
  187 41 24.963888 43.234769 -3.784274 43 V A 21 0.06000 0.06000 "VAL " " HB " "    " 1 0 0 0 FFFFFF  H184  2 <> 1 0 0 0 0 0 0 <> <> 0 187 <> 0 0 1 <> <> <> <> <>
  188 41 23.566441 45.290581 -3.274585 43 V A 21 0.06000 0.06000 "VAL " "1HG1" "    " 1 0 0 0 FFFFFF  H185  2 <> 1 0 0 0 0 0 0 <> <> 0 188 <> 0 0 1 <> <> <> <> <>
  189 41 24.067585 45.191975 -4.946841 43 V A 21 0.06000 0.06000 "VAL " "2HG1" "    " 1 0 0 0 FFFFFF  H186  2 <> 1 0 0 0 0 0 0 <> <> 0 189 <> 0 0 1 <> <> <> <> <>
  190 41 22.428915 44.757967 -4.508631 43 V A 21 0.06000 0.06000 "VAL " "3HG1" "    " 1 0 0 0 FFFFFF  H187  2 <> 1 0 0 0 0 0 0 <> <> 0 190 <> 0 0 1 <> <> <> <> <>
  191 41 23.476474 43.353378 -1.831272 43 V A 21 0.06000 0.06000 "VAL " "1HG2" "    " 1 0 0 0 FFFFFF  H188  2 <> 1 0 0 0 0 0 0 <> <> 0 191 <> 0 0 1 <> <> <> <> <>
  192 41 22.185335 42.589752 -2.768055 43 V A 21 0.06000 0.06000 "VAL " "2HG2" "    " 1 0 0 0 FFFFFF  H189  2 <> 1 0 0 0 0 0 0 <> <> 0 192 <> 0 0 1 <> <> <> <> <>
  193 41 23.687628 41.725326 -2.415459 43 V A 21 0.06000 0.06000 "VAL " "3HG2" "    " 1 0 0 0 FFFFFF  H190  2 <> 1 0 0 0 0 0 0 <> <> 0 193 <> 0 0 1 <> <> <> <> <>
  194 25 23.757984 43.221769 -7.530411 44 Q A 43 -0.50000 -0.50000 "GLN " " N  " "    " 7 0 0 0 5757FF  N191  2 <> 1 0 0 0 0 0 0 <> <> 0 194 <> 0 0 1 <> <> <> <> <>
  195 3 24.353571 44.074094 -8.549820 44 Q A 2 0.14000 0.14000 "GLN " " CA " "    " 6 0 0 0 A0A0A0  C192  2 <> 1 0 0 0 0 0 0 <> <> 0 195 <> 0 0 1 <> <> <> <> <>
  196 2 23.666529 45.429394 -8.362532 44 Q A 2 0.50000 0.50000 "GLN " " C  " "    " 6 0 0 0 A0A0A0  C193  2 <> 1 0 0 0 0 0 0 <> <> 0 196 <> 0 0 1 <> <> <> <> <>
  197 15 22.444104 45.516710 -8.432995 44 Q A 70 -0.50000 -0.50000 "GLN " " O  " "    " 8 0 0 0 FF2F2F  O194  2 <> 1 0 0 0 0 0 0 <> <> 0 197 <> 0 0 1 <> <> <> <> <>
  198 3 24.084238 43.495767 -9.964660 44 Q A 2 -0.12000 -0.12000 "GLN " " CB " "    " 6 0 0 0 A0A0A0  C195  2 <> 1 0 0 0 0 0 0 <> <> 0 198 <> 0 0 1 <> <> <> <> <>
  199 3 25.296864 43.584697 -10.915005 44 Q A 2 -0.12000 -0.12000 "GLN " " CG " "    " 6 0 0 0 A0A0A0  C196  2 <> 1 0 0 0 0 0 0 <> <> 0 199 <> 0 0 1 <> <> <> <> <>
  200 2 25.844964 45.003378 -11.057123 44 Q A 2 0.50000 0.50000 "GLN " " CD " "    " 6 0 0 0 A0A0A0  C197  2 <> 1 0 0 0 0 0 0 <> <> 0 200 <> 0 0 1 <> <> <> <> <>
  201 15 25.104966 45.951576 -11.297787 44 Q A 70 -0.50000 -0.50000 "GLN " " OE1" "    " 8 0 0 0 FF2F2F  O198  2 <> 1 0 0 0 0 0 0 <> <> 0 201 <> 0 0 1 <> <> <> <> <>
  202 25 27.140514 45.188961 -10.858864 44 Q A 43 -0.76000 -0.76000 "GLN " " NE2" "    " 7 0 0 0 5757FF  N199  2 <> 1 0 0 0 0 0 0 <> <> 0 202 <> 0 0 1 <> <> <> <> <>
  203 43 22.724118 43.144361 -7.537804 44 Q A 21 0.30000 0.30000 "GLN " " H  " "    " 1 0 0 0 FFFFFF  H200  2 <> 1 0 0 0 0 0 0 <> <> 0 203 <> 0 0 1 <> <> <> <> <>
  204 41 25.427539 44.189303 -8.399254 44 Q A 21 0.06000 0.06000 "GLN " " HA " "    " 1 0 0 0 FFFFFF  H201  2 <> 1 0 0 0 0 0 0 <> <> 0 204 <> 0 0 1 <> <> <> <> <>
  205 41 23.798021 42.446130 -9.884452 44 Q A 21 0.06000 0.06000 "GLN " "1HB " "    " 1 0 0 0 FFFFFF  H202  2 <> 1 0 0 0 0 0 0 <> <> 0 205 <> 0 0 1 <> <> <> <> <>
  206 41 23.233684 43.984590 -10.438320 44 Q A 21 0.06000 0.06000 "GLN " "2HB " "    " 1 0 0 0 FFFFFF  H203  2 <> 1 0 0 0 0 0 0 <> <> 0 206 <> 0 0 1 <> <> <> <> <>
  207 41 26.084126 42.915323 -10.568556 44 Q A 21 0.06000 0.06000 "GLN " "1HG " "    " 1 0 0 0 FFFFFF  H204  2 <> 1 0 0 0 0 0 0 <> <> 0 207 <> 0 0 1 <> <> <> <> <>
  208 41 25.010484 43.227163 -11.904406 44 Q A 21 0.06000 0.06000 "GLN " "2HG " "    " 1 0 0 0 FFFFFF  H205  2 <> 1 0 0 0 0 0 0 <> <> 0 208 <> 0 0 1 <> <> <> <> <>
  209 43 27.478706 46.133931 -10.859002 44 Q A 21 0.38000 0.38000 "GLN " "1HE2" "    " 1 0 0 0 FFFFFF  H206  2 <> 1 0 0 0 0 0 0 <> <> 0 209 <> 0 0 1 <> <> <> <> <>
  210 43 27.718182 44.435837 -10.477547 44 Q A 21 0.38000 0.38000 "GLN " "2HE2" "    " 1 0 0 0 FFFFFF  H207  2 <> 1 0 0 0 0 0 0 <> <> 0 210 <> 0 0 1 <> <> <> <> <>
  211 25 24.422901 46.506803 -8.123156 45 M A 43 -0.50000 -0.50000 "MET " " N  " "    " 7 0 0 0 5757FF  N208  1 <> 1 0 0 0 0 0 0 <> <> 0 211 <> 0 0 1 <> <> <> <> <>
  212 3 23.833591 47.810743 -7.801879 45 M A 2 0.14000 0.14000 "MET " " CA " "    " 6 0 0 0 A0A0A0  C209  1 <> 1 0 0 0 0 0 0 <> <> 0 212 <> 0 0 1 <> <> <> <> <>
  213 2 22.983913 48.414886 -8.937090 45 M A 2 0.50000 0.50000 "MET " " C  " "    " 6 0 0 0 A0A0A0  C210  1 <> 1 0 0 0 0 0 0 <> <> 0 213 <> 0 0 1 <> <> <> <> <>
  214 15 22.144897 49.261311 -8.652324 45 M A 70 -0.50000 -0.50000 "MET " " O  " "    " 8 0 0 0 FF2F2F  O211  1 <> 1 0 0 0 0 0 0 <> <> 0 214 <> 0 0 1 <> <> <> <> <>
  215 3 24.899421 48.816643 -7.337561 45 M A 2 -0.12000 -0.12000 "MET " " CB " "    " 6 0 0 0 A0A0A0  C212  1 <> 1 0 0 0 0 0 0 <> <> 0 215 <> 0 0 1 <> <> <> <> <>
  216 3 25.599558 48.416841 -6.023639 45 M A 2 0.04750 0.04750 "MET " " CG " "    " 6 0 0 0 A0A0A0  C213  1 <> 1 0 0 0 0 0 0 <> <> 0 216 <> 0 0 1 <> <> <> <> <>
  217 49 24.537411 48.242344 -4.561849 45 M A 13 -0.33500 -0.33500 "MET " " SD " "    " 16 0 0 0 E1E11E  S214  1 <> 1 0 0 0 0 0 0 <> <> 0 217 <> 0 0 1 <> <> <> <> <>
  218 3 23.822195 49.901187 -4.473115 45 M A 2 -0.01250 -0.01250 "MET " " CE " "    " 6 0 0 0 A0A0A0  C215  1 <> 1 0 0 0 0 0 0 <> <> 0 218 <> 0 0 1 <> <> <> <> <>
  219 43 25.429679 46.388139 -8.055848 45 M A 21 0.30000 0.30000 "MET " " H  " "    " 1 0 0 0 FFFFFF  H216  1 <> 1 0 0 0 0 0 0 <> <> 0 219 <> 0 0 1 <> <> <> <> <>
  220 41 23.146042 47.650859 -6.971968 45 M A 21 0.06000 0.06000 "MET " " HA " "    " 1 0 0 0 FFFFFF  H217  1 <> 1 0 0 0 0 0 0 <> <> 0 220 <> 0 0 1 <> <> <> <> <>
  221 41 25.620386 48.962663 -8.135827 45 M A 21 0.06000 0.06000 "MET " "1HB " "    " 1 0 0 0 FFFFFF  H218  1 <> 1 0 0 0 0 0 0 <> <> 0 221 <> 0 0 1 <> <> <> <> <>
  222 41 24.444039 49.798766 -7.200141 45 M A 21 0.06000 0.06000 "MET " "2HB " "    " 1 0 0 0 FFFFFF  H219  1 <> 1 0 0 0 0 0 0 <> <> 0 222 <> 0 0 1 <> <> <> <> <>
  223 41 26.117648 47.469063 -6.147068 45 M A 21 0.06000 0.06000 "MET " "1HG " "    " 1 0 0 0 FFFFFF  H220  1 <> 1 0 0 0 0 0 0 <> <> 0 223 <> 0 0 1 <> <> <> <> <>
  224 41 26.372103 49.145396 -5.782955 45 M A 21 0.06000 0.06000 "MET " "2HG " "    " 1 0 0 0 FFFFFF  H221  1 <> 1 0 0 0 0 0 0 <> <> 0 224 <> 0 0 1 <> <> <> <> <>
  225 41 23.296738 50.039876 -3.529341 45 M A 21 0.06000 0.06000 "MET " "1HE " "    " 1 0 0 0 FFFFFF  H222  1 <> 1 0 0 0 0 0 0 <> <> 0 225 <> 0 0 1 <> <> <> <> <>
  226 41 24.595338 50.663617 -4.546939 45 M A 21 0.06000 0.06000 "MET " "2HE " "    " 1 0 0 0 FFFFFF  H223  1 <> 1 0 0 0 0 0 0 <> <> 0 226 <> 0 0 1 <> <> <> <> <>
  227 41 23.112629 50.037222 -5.287527 45 M A 21 0.06000 0.06000 "MET " "3HE " "    " 1 0 0 0 FFFFFF  H224  1 <> 1 0 0 0 0 0 0 <> <> 0 227 <> 0 0 1 <> <> <> <> <>
  228 25 23.115728 47.947395 -10.190216 46 L A 43 -0.50000 -0.50000 "LEU " " N  " "    " 7 0 0 0 5757FF  N225  1 <> 1 0 0 0 0 0 0 <> <> 0 228 <> 0 0 1 <> <> <> <> <>
  229 3 22.180429 48.268443 -11.271810 46 L A 2 0.14000 0.14000 "LEU " " CA " "    " 6 0 0 0 A0A0A0  C226  1 <> 1 0 0 0 0 0 0 <> <> 0 229 <> 0 0 1 <> <> <> <> <>
  230 2 20.807506 47.618075 -11.005107 46 L A 2 0.50000 0.50000 "LEU " " C  " "    " 6 0 0 0 A0A0A0  C227  1 <> 1 0 0 0 0 0 0 <> <> 0 230 <> 0 0 1 <> <> <> <> <>
  231 15 19.800076 48.320897 -10.992355 46 L A 70 -0.50000 -0.50000 "LEU " " O  " "    " 8 0 0 0 FF2F2F  O228  1 <> 1 0 0 0 0 0 0 <> <> 0 231 <> 0 0 1 <> <> <> <> <>
  232 3 22.770600 47.795796 -12.622015 46 L A 2 -0.12000 -0.12000 "LEU " " CB " "    " 6 0 0 0 A0A0A0  C229  1 <> 1 0 0 0 0 0 0 <> <> 0 232 <> 0 0 1 <> <> <> <> <>
  233 3 21.923380 48.099533 -13.881897 46 L A 2 -0.06000 -0.06000 "LEU " " CG " "    " 6 0 0 0 A0A0A0  C230  1 <> 1 0 0 0 0 0 0 <> <> 0 233 <> 0 0 1 <> <> <> <> <>
  234 3 21.598000 49.595966 -14.035244 46 L A 2 -0.18000 -0.18000 "LEU " " CD1" "    " 6 0 0 0 A0A0A0  C231  1 <> 1 0 0 0 0 0 0 <> <> 0 234 <> 0 0 1 <> <> <> <> <>
  235 3 22.628186 47.560348 -15.136286 46 L A 2 -0.18000 -0.18000 "LEU " " CD2" "    " 6 0 0 0 A0A0A0  C232  1 <> 1 0 0 0 0 0 0 <> <> 0 235 <> 0 0 1 <> <> <> <> <>
  236 43 23.808312 47.226064 -10.361232 46 L A 21 0.30000 0.30000 "LEU " " H  " "    " 1 0 0 0 FFFFFF  H233  1 <> 1 0 0 0 0 0 0 <> <> 0 236 <> 0 0 1 <> <> <> <> <>
  237 41 22.051030 49.351753 -11.295646 46 L A 21 0.06000 0.06000 "LEU " " HA " "    " 1 0 0 0 FFFFFF  H234  1 <> 1 0 0 0 0 0 0 <> <> 0 237 <> 0 0 1 <> <> <> <> <>
  238 41 23.756166 48.246676 -12.744822 46 L A 21 0.06000 0.06000 "LEU " "1HB " "    " 1 0 0 0 FFFFFF  H235  1 <> 1 0 0 0 0 0 0 <> <> 0 238 <> 0 0 1 <> <> <> <> <>
  239 41 22.942112 46.719274 -12.577554 46 L A 21 0.06000 0.06000 "LEU " "2HB " "    " 1 0 0 0 FFFFFF  H236  1 <> 1 0 0 0 0 0 0 <> <> 0 239 <> 0 0 1 <> <> <> <> <>
  240 41 20.971848 47.569050 -13.801193 46 L A 21 0.06000 0.06000 "LEU " " HG " "    " 1 0 0 0 FFFFFF  H237  1 <> 1 0 0 0 0 0 0 <> <> 0 240 <> 0 0 1 <> <> <> <> <>
  241 41 21.093463 49.795842 -14.981343 46 L A 21 0.06000 0.06000 "LEU " "1HD1" "    " 1 0 0 0 FFFFFF  H238  1 <> 1 0 0 0 0 0 0 <> <> 0 241 <> 0 0 1 <> <> <> <> <>
  242 41 20.921538 49.934994 -13.249441 46 L A 21 0.06000 0.06000 "LEU " "2HD1" "    " 1 0 0 0 FFFFFF  H239  1 <> 1 0 0 0 0 0 0 <> <> 0 242 <> 0 0 1 <> <> <> <> <>
  243 41 22.496432 50.212188 -13.989827 46 L A 21 0.06000 0.06000 "LEU " "3HD1" "    " 1 0 0 0 FFFFFF  H240  1 <> 1 0 0 0 0 0 0 <> <> 0 243 <> 0 0 1 <> <> <> <> <>
  244 41 22.028994 47.732885 -16.030643 46 L A 21 0.06000 0.06000 "LEU " "1HD2" "    " 1 0 0 0 FFFFFF  H241  1 <> 1 0 0 0 0 0 0 <> <> 0 244 <> 0 0 1 <> <> <> <> <>
  245 41 23.598881 48.033640 -15.280782 46 L A 21 0.06000 0.06000 "LEU " "2HD2" "    " 1 0 0 0 FFFFFF  H242  1 <> 1 0 0 0 0 0 0 <> <> 0 245 <> 0 0 1 <> <> <> <> <>
  246 41 22.793644 46.484600 -15.061613 46 L A 21 0.06000 0.06000 "LEU " "3HD2" "    " 1 0 0 0 FFFFFF  H243  1 <> 1 0 0 0 0 0 0 <> <> 0 246 <> 0 0 1 <> <> <> <> <>
  247 25 20.786814 46.307354 -10.712958 47 E A 43 -0.50000 -0.50000 "GLU " " N  " "    " 7 0 0 0 5757FF  N244  1 <> 1 0 0 0 0 0 0 <> <> 0 247 <> 0 0 1 <> <> <> <> <>
  248 3 19.617126 45.521425 -10.299854 47 E A 2 0.14000 0.14000 "GLU " " CA " "    " 6 0 0 0 A0A0A0  C245  1 <> 1 0 0 0 0 0 0 <> <> 0 248 <> 0 0 1 <> <> <> <> <>
  249 2 18.968129 46.102053 -9.031535 47 E A 2 0.50000 0.50000 "GLU " " C  " "    " 6 0 0 0 A0A0A0  C246  1 <> 1 0 0 0 0 0 0 <> <> 0 249 <> 0 0 1 <> <> <> <> <>
  250 15 17.748417 46.278911 -8.964518 47 E A 70 -0.50000 -0.50000 "GLU " " O  " "    " 8 0 0 0 FF2F2F  O247  1 <> 1 0 0 0 0 0 0 <> <> 0 250 <> 0 0 1 <> <> <> <> <>
  251 3 20.024916 44.019489 -10.201795 47 E A 2 -0.12000 -0.12000 "GLU " " CB " "    " 6 0 0 0 A0A0A0  C248  1 <> 1 0 0 0 0 0 0 <> <> 0 251 <> 0 0 1 <> <> <> <> <>
  252 3 19.259417 43.080683 -9.232747 47 E A 2 -0.22000 -0.22000 "GLU " " CG " "    " 6 0 0 0 A0A0A0  C249  1 <> 1 0 0 0 0 0 0 <> <> 0 252 <> 0 0 1 <> <> <> <> <>
  253 2 19.778518 43.051095 -7.791899 47 E A 2 0.70000 0.70000 "GLU " " CD " "    " 6 0 0 0 A0A0A0  C250  1 <> 1 0 0 0 0 0 0 <> <> 0 253 <> 0 0 1 <> <> <> <> <>
  254 18 21.012490 43.044544 -7.593597 47 E A 70 -0.80000 -0.80000 "GLU " " OE1" "    " 8 -1 0 0 FF2F2F  O251  1 <> 1 0 0 0 0 0 0 <> <> 0 254 <> 0 0 1 <> <> <> <> <>
  255 15 18.914510 43.018086 -6.887876 47 E A 70 -0.80000 -0.80000 "GLU " " OE2" "    " 8 0 0 0 FF2F2F  O252  1 <> 1 0 0 0 0 0 0 <> <> 0 255 <> 0 0 1 <> <> <> <> <>
  256 43 21.680784 45.859649 -10.583578 47 E A 21 0.30000 0.30000 "GLU " " H  " "    " 1 0 0 0 FFFFFF  H253  1 <> 1 0 0 0 0 0 0 <> <> 0 256 <> 0 0 1 <> <> <> <> <>
  257 41 18.869166 45.613429 -11.090371 47 E A 21 0.06000 0.06000 "GLU " " HA " "    " 1 0 0 0 FFFFFF  H254  1 <> 1 0 0 0 0 0 0 <> <> 0 257 <> 0 0 1 <> <> <> <> <>
  258 41 19.957887 43.594729 -11.202757 47 E A 21 0.06000 0.06000 "GLU " "1HB " "    " 1 0 0 0 FFFFFF  H255  1 <> 1 0 0 0 0 0 0 <> <> 0 258 <> 0 0 1 <> <> <> <> <>
  259 41 21.078766 43.944738 -9.948061 47 E A 21 0.06000 0.06000 "GLU " "2HB " "    " 1 0 0 0 FFFFFF  H256  1 <> 1 0 0 0 0 0 0 <> <> 0 259 <> 0 0 1 <> <> <> <> <>
  260 41 18.192632 43.304364 -9.240349 47 E A 21 0.06000 0.06000 "GLU " "1HG " "    " 1 0 0 0 FFFFFF  H257  1 <> 1 0 0 0 0 0 0 <> <> 0 260 <> 0 0 1 <> <> <> <> <>
  261 41 19.353073 42.057115 -9.593734 47 E A 21 0.06000 0.06000 "GLU " "2HG " "    " 1 0 0 0 FFFFFF  H258  1 <> 1 0 0 0 0 0 0 <> <> 0 261 <> 0 0 1 <> <> <> <> <>
  262 25 19.801859 46.478098 -8.055093 48 L A 43 -0.50000 -0.50000 "LEU " " N  " "    " 7 0 0 0 5757FF  N259  1 <> 1 0 0 0 0 0 0 <> <> 0 262 <> 0 0 1 <> <> <> <> <>
  263 3 19.370016 47.113018 -6.820641 48 L A 2 0.14000 0.14000 "LEU " " CA " "    " 6 0 0 0 A0A0A0  C260  1 <> 1 0 0 0 0 0 0 <> <> 0 263 <> 0 0 1 <> <> <> <> <>
  264 2 18.768279 48.503122 -7.087387 48 L A 2 0.50000 0.50000 "LEU " " C  " "    " 6 0 0 0 A0A0A0  C261  1 <> 1 0 0 0 0 0 0 <> <> 0 264 <> 0 0 1 <> <> <> <> <>
  265 15 17.731625 48.834109 -6.516894 48 L A 70 -0.50000 -0.50000 "LEU " " O  " "    " 8 0 0 0 FF2F2F  O262  1 <> 1 0 0 0 0 0 0 <> <> 0 265 <> 0 0 1 <> <> <> <> <>
  266 3 20.539197 47.190090 -5.819559 48 L A 2 -0.12000 -0.12000 "LEU " " CB " "    " 6 0 0 0 A0A0A0  C263  1 <> 1 0 0 0 0 0 0 <> <> 0 266 <> 0 0 1 <> <> <> <> <>
  267 3 20.056040 47.172468 -4.356271 48 L A 2 -0.06000 -0.06000 "LEU " " CG " "    " 6 0 0 0 A0A0A0  C264  1 <> 1 0 0 0 0 0 0 <> <> 0 267 <> 0 0 1 <> <> <> <> <>
  268 3 19.566696 45.779138 -3.930578 48 L A 2 -0.18000 -0.18000 "LEU " " CD1" "    " 6 0 0 0 A0A0A0  C265  1 <> 1 0 0 0 0 0 0 <> <> 0 268 <> 0 0 1 <> <> <> <> <>
  269 3 21.125699 47.700692 -3.397770 48 L A 2 -0.18000 -0.18000 "LEU " " CD2" "    " 6 0 0 0 A0A0A0  C266  1 <> 1 0 0 0 0 0 0 <> <> 0 269 <> 0 0 1 <> <> <> <> <>
  270 43 20.770048 46.171081 -8.141503 48 L A 21 0.30000 0.30000 "LEU " " H  " "    " 1 0 0 0 FFFFFF  H267  1 <> 1 0 0 0 0 0 0 <> <> 0 270 <> 0 0 1 <> <> <> <> <>
  271 41 18.583802 46.491326 -6.404306 48 L A 21 0.06000 0.06000 "LEU " " HA " "    " 1 0 0 0 FFFFFF  H268  1 <> 1 0 0 0 0 0 0 <> <> 0 271 <> 0 0 1 <> <> <> <> <>
  272 41 21.226537 46.356244 -5.973133 48 L A 21 0.06000 0.06000 "LEU " "1HB " "    " 1 0 0 0 FFFFFF  H269  1 <> 1 0 0 0 0 0 0 <> <> 0 272 <> 0 0 1 <> <> <> <> <>
  273 41 21.119826 48.094292 -6.007638 48 L A 21 0.06000 0.06000 "LEU " "2HB " "    " 1 0 0 0 FFFFFF  H270  1 <> 1 0 0 0 0 0 0 <> <> 0 273 <> 0 0 1 <> <> <> <> <>
  274 41 19.209908 47.851828 -4.276308 48 L A 21 0.06000 0.06000 "LEU " " HG " "    " 1 0 0 0 FFFFFF  H271  1 <> 1 0 0 0 0 0 0 <> <> 0 274 <> 0 0 1 <> <> <> <> <>
  275 41 19.357079 45.739365 -2.865476 48 L A 21 0.06000 0.06000 "LEU " "1HD1" "    " 1 0 0 0 FFFFFF  H272  1 <> 1 0 0 0 0 0 0 <> <> 0 275 <> 0 0 1 <> <> <> <> <>
  276 41 18.645468 45.510593 -4.441430 48 L A 21 0.06000 0.06000 "LEU " "2HD1" "    " 1 0 0 0 FFFFFF  H273  1 <> 1 0 0 0 0 0 0 <> <> 0 276 <> 0 0 1 <> <> <> <> <>
  277 41 20.291166 44.997679 -4.150985 48 L A 21 0.06000 0.06000 "LEU " "3HD1" "    " 1 0 0 0 FFFFFF  H274  1 <> 1 0 0 0 0 0 0 <> <> 0 277 <> 0 0 1 <> <> <> <> <>
  278 41 20.743076 47.753401 -2.380724 48 L A 21 0.06000 0.06000 "LEU " "1HD2" "    " 1 0 0 0 FFFFFF  H275  1 <> 1 0 0 0 0 0 0 <> <> 0 278 <> 0 0 1 <> <> <> <> <>
  279 41 22.014644 47.072884 -3.399527 48 L A 21 0.06000 0.06000 "LEU " "2HD2" "    " 1 0 0 0 FFFFFF  H276  1 <> 1 0 0 0 0 0 0 <> <> 0 279 <> 0 0 1 <> <> <> <> <>
  280 41 21.426489 48.708006 -3.676005 48 L A 21 0.06000 0.06000 "LEU " "3HD2" "    " 1 0 0 0 FFFFFF  H277  1 <> 1 0 0 0 0 0 0 <> <> 0 280 <> 0 0 1 <> <> <> <> <>
  281 25 19.347045 49.299041 -7.996073 49 Y A 43 -0.50000 -0.50000 "TYR " " N  " "    " 7 0 0 0 5757FF  N278  1 <> 1 0 0 0 0 0 0 <> <> 0 281 <> 0 0 1 <> <> <> <> <>
  282 3 18.798703 50.593933 -8.398239 49 Y A 2 0.14000 0.14000 "TYR " " CA " "    " 6 0 0 0 A0A0A0  C279  1 <> 1 0 0 0 0 0 0 <> <> 0 282 <> 0 0 1 <> <> <> <> <>
  283 2 17.504400 50.430942 -9.212122 49 Y A 2 0.50000 0.50000 "TYR " " C  " "    " 6 0 0 0 A0A0A0  C280  1 <> 1 0 0 0 0 0 0 <> <> 0 283 <> 0 0 1 <> <> <> <> <>
  284 15 16.568285 51.206495 -9.003811 49 Y A 70 -0.50000 -0.50000 "TYR " " O  " "    " 8 0 0 0 FF2F2F  O281  1 <> 1 0 0 0 0 0 0 <> <> 0 284 <> 0 0 1 <> <> <> <> <>
  285 3 19.851331 51.450567 -9.143808 49 Y A 2 -0.00500 -0.00500 "TYR " " CB " "    " 6 0 0 0 A0A0A0  C282  1 <> 1 0 0 0 0 0 0 <> <> 0 285 <> 0 0 1 <> <> <> <> <>
  286 2 20.707973 52.303322 -8.208035 49 Y A 2 -0.11500 -0.11500 "TYR " " CG " "    " 6 0 0 0 A0A0A0  C283  1 <> 1 0 0 0 0 0 0 <> <> 0 286 <> 0 0 1 <> <> <> <> <>
  287 2 21.231206 51.752781 -7.016347 49 Y A 2 -0.11500 -0.11500 "TYR " " CD1" "    " 6 0 0 0 A0A0A0  C284  1 <> 1 0 0 0 0 0 0 <> <> 0 287 <> 0 0 1 <> <> <> <> <>
  288 2 21.904146 52.562027 -6.088012 49 Y A 2 -0.11500 -0.11500 "TYR " " CE1" "    " 6 0 0 0 A0A0A0  C285  1 <> 1 0 0 0 0 0 0 <> <> 0 288 <> 0 0 1 <> <> <> <> <>
  289 2 20.921815 53.674788 -8.478484 49 Y A 2 -0.11500 -0.11500 "TYR " " CD2" "    " 6 0 0 0 A0A0A0  C286  1 <> 1 0 0 0 0 0 0 <> <> 0 289 <> 0 0 1 <> <> <> <> <>
  290 2 21.598196 54.486945 -7.543321 49 Y A 2 -0.11500 -0.11500 "TYR " " CE2" "    " 6 0 0 0 A0A0A0  C287  1 <> 1 0 0 0 0 0 0 <> <> 0 290 <> 0 0 1 <> <> <> <> <>
  291 2 22.070569 53.929654 -6.338664 49 Y A 2 0.15000 0.15000 "TYR " " CZ " "    " 6 0 0 0 A0A0A0  C288  1 <> 1 0 0 0 0 0 0 <> <> 0 291 <> 0 0 1 <> <> <> <> <>
  292 16 22.688541 54.699738 -5.403112 49 Y A 70 -0.58500 -0.58500 "TYR " " OH " "    " 8 0 0 0 FF2F2F  O289  1 <> 1 0 0 0 0 0 0 <> <> 0 292 <> 0 0 1 <> <> <> <> <>
  293 43 20.212718 48.993605 -8.431273 49 Y A 21 0.30000 0.30000 "TYR " " H  " "    " 1 0 0 0 FFFFFF  H290  1 <> 1 0 0 0 0 0 0 <> <> 0 293 <> 0 0 1 <> <> <> <> <>
  294 41 18.513202 51.132605 -7.493961 49 Y A 21 0.06000 0.06000 "TYR " " HA " "    " 1 0 0 0 FFFFFF  H291  1 <> 1 0 0 0 0 0 0 <> <> 0 294 <> 0 0 1 <> <> <> <> <>
  295 41 20.487689 50.832898 -9.777025 49 Y A 21 0.06000 0.06000 "TYR " "1HB " "    " 1 0 0 0 FFFFFF  H292  1 <> 1 0 0 0 0 0 0 <> <> 0 295 <> 0 0 1 <> <> <> <> <>
  296 41 19.343544 52.130342 -9.830141 49 Y A 21 0.06000 0.06000 "TYR " "2HB " "    " 1 0 0 0 FFFFFF  H293  1 <> 1 0 0 0 0 0 0 <> <> 0 296 <> 0 0 1 <> <> <> <> <>
  297 41 21.100062 50.708557 -6.778712 49 Y A 21 0.11500 0.11500 "TYR " " HD1" "    " 1 0 0 0 FFFFFF  H294  1 <> 1 0 0 0 0 0 0 <> <> 0 297 <> 0 0 1 <> <> <> <> <>
  298 41 22.278287 52.137330 -5.170331 49 Y A 21 0.11500 0.11500 "TYR " " HE1" "    " 1 0 0 0 FFFFFF  H295  1 <> 1 0 0 0 0 0 0 <> <> 0 298 <> 0 0 1 <> <> <> <> <>
  299 41 20.534620 54.122512 -9.383001 49 Y A 21 0.11500 0.11500 "TYR " " HD2" "    " 1 0 0 0 FFFFFF  H296  1 <> 1 0 0 0 0 0 0 <> <> 0 299 <> 0 0 1 <> <> <> <> <>
  300 41 21.723317 55.542290 -7.738960 49 Y A 21 0.11500 0.11500 "TYR " " HE2" "    " 1 0 0 0 FFFFFF  H297  1 <> 1 0 0 0 0 0 0 <> <> 0 300 <> 0 0 1 <> <> <> <> <>
  301 42 23.320311 55.284518 -5.831187 49 Y A 21 0.43500 0.43500 "TYR " " HH " "    " 1 0 0 0 FFFFFF  H298  1 <> 1 0 0 0 0 0 0 <> <> 0 301 <> 0 0 1 <> <> <> <> <>
  302 25 17.373847 49.390083 -10.047218 50 D A 43 -0.50000 -0.50000 "ASP " " N  " "    " 7 0 0 0 5757FF  N299  1 <> 1 0 0 0 0 0 0 <> <> 0 302 <> 0 0 1 <> <> <> <> <>
  303 3 16.119536 48.997874 -10.709843 50 D A 2 0.14000 0.14000 "ASP " " CA " "    " 6 0 0 0 A0A0A0  C300  1 <> 1 0 0 0 0 0 0 <> <> 0 303 <> 0 0 1 <> <> <> <> <>
  304 2 15.011764 48.677480 -9.684336 50 D A 2 0.50000 0.50000 "ASP " " C  " "    " 6 0 0 0 A0A0A0  C301  1 <> 1 0 0 0 0 0 0 <> <> 0 304 <> 0 0 1 <> <> <> <> <>
  305 15 13.876145 49.127579 -9.859601 50 D A 70 -0.50000 -0.50000 "ASP " " O  " "    " 8 0 0 0 FF2F2F  O302  1 <> 1 0 0 0 0 0 0 <> <> 0 305 <> 0 0 1 <> <> <> <> <>
  306 3 16.302546 47.820245 -11.697930 50 D A 2 -0.22000 -0.22000 "ASP " " CB " "    " 6 0 0 0 A0A0A0  C303  1 <> 1 0 0 0 0 0 0 <> <> 0 306 <> 0 0 1 <> <> <> <> <>
  307 2 17.075054 48.135958 -12.977201 50 D A 2 0.70000 0.70000 "ASP " " CG " "    " 6 0 0 0 A0A0A0  C304  1 <> 1 0 0 0 0 0 0 <> <> 0 307 <> 0 0 1 <> <> <> <> <>
  308 18 17.547655 47.181889 -13.632086 50 D A 70 -0.80000 -0.80000 "ASP " " OD2" "    " 8 -1 0 0 FF2F2F  O305  1 <> 1 0 0 0 0 0 0 <> <> 0 308 <> 0 0 1 <> <> <> <> <>
  309 15 17.134388 49.316599 -13.397500 50 D A 70 -0.80000 -0.80000 "ASP " " OD1" "    " 8 0 0 0 FF2F2F  O306  1 <> 1 0 0 0 0 0 0 <> <> 0 309 <> 0 0 1 <> <> <> <> <>
  310 43 18.204310 48.833874 -10.255465 50 D A 21 0.30000 0.30000 "ASP " " H  " "    " 1 0 0 0 FFFFFF  H307  1 <> 1 0 0 0 0 0 0 <> <> 0 310 <> 0 0 1 <> <> <> <> <>
  311 41 15.773900 49.859823 -11.283657 50 D A 21 0.06000 0.06000 "ASP " " HA " "    " 1 0 0 0 FFFFFF  H308  1 <> 1 0 0 0 0 0 0 <> <> 0 311 <> 0 0 1 <> <> <> <> <>
  312 41 16.788721 46.979312 -11.208294 50 D A 21 0.06000 0.06000 "ASP " "1HB " "    " 1 0 0 0 FFFFFF  H309  1 <> 1 0 0 0 0 0 0 <> <> 0 312 <> 0 0 1 <> <> <> <> <>
  313 41 15.327303 47.455249 -12.019742 50 D A 21 0.06000 0.06000 "ASP " "2HB " "    " 1 0 0 0 FFFFFF  H310  1 <> 1 0 0 0 0 0 0 <> <> 0 313 <> 0 0 1 <> <> <> <> <>
  314 25 15.350780 48.040310 -8.552507 51 R A 43 -0.50000 -0.50000 "ARG " " N  " "    " 7 0 0 0 5757FF  N311  1 <> 1 0 0 0 0 0 0 <> <> 0 314 <> 0 0 1 <> <> <> <> <>
  315 3 14.461512 47.800954 -7.406629 51 R A 2 0.14000 0.14000 "ARG " " CA " "    " 6 0 0 0 A0A0A0  C312  1 <> 1 0 0 0 0 0 0 <> <> 0 315 <> 0 0 1 <> <> <> <> <>
  316 2 14.154509 49.100567 -6.623405 51 R A 2 0.50000 0.50000 "ARG " " C  " "    " 6 0 0 0 A0A0A0  C313  1 <> 1 0 0 0 0 0 0 <> <> 0 316 <> 0 0 1 <> <> <> <> <>
  317 15 13.015972 49.566177 -6.651230 51 R A 70 -0.50000 -0.50000 "ARG " " O  " "    " 8 0 0 0 FF2F2F  O314  1 <> 1 0 0 0 0 0 0 <> <> 0 317 <> 0 0 1 <> <> <> <> <>
  318 3 15.091347 46.756791 -6.453421 51 R A 2 -0.12000 -0.12000 "ARG " " CB " "    " 6 0 0 0 A0A0A0  C315  1 <> 1 0 0 0 0 0 0 <> <> 0 318 <> 0 0 1 <> <> <> <> <>
  319 3 15.161417 45.331935 -7.034490 51 R A 2 -0.05000 -0.05000 "ARG " " CG " "    " 6 0 0 0 A0A0A0  C316  1 <> 1 0 0 0 0 0 0 <> <> 0 319 <> 0 0 1 <> <> <> <> <>
  320 3 16.265683 44.472319 -6.401330 51 R A 2 0.19000 0.19000 "ARG " " CD " "    " 6 0 0 0 A0A0A0  C317  1 <> 1 0 0 0 0 0 0 <> <> 0 320 <> 0 0 1 <> <> <> <> <>
  321 25 16.188903 44.436888 -4.932009 51 R A 43 -0.69997 -0.69997 "ARG " " NE " "    " 7 0 0 0 5757FF  N318  1 <> 1 0 0 0 0 0 0 <> <> 0 321 <> 0 0 1 <> <> <> <> <>
  322 2 16.919958 43.657629 -4.129332 51 R A 2 0.63990 0.63990 "ARG " " CZ " "    " 6 0 0 0 A0A0A0  C319  1 <> 1 0 0 0 0 0 0 <> <> 0 322 <> 0 0 1 <> <> <> <> <>
  323 25 17.866758 42.837689 -4.591306 51 R A 43 -0.79997 -0.79997 "ARG " " NH1" "    " 7 0 0 0 5757FF  N320  1 <> 1 0 0 0 0 0 0 <> <> 0 323 <> 0 0 1 <> <> <> <> <>
  324 31 16.661083 43.740847 -2.829112 51 R A 43 -0.79997 -0.79997 "ARG " " NH2" "    " 7 1 0 0 5757FF  N321  1 <> 1 0 0 0 0 0 0 <> <> 0 324 <> 0 0 1 <> <> <> <> <>
  325 43 16.299705 47.674822 -8.507382 51 R A 21 0.30000 0.30000 "ARG " " H  " "    " 1 0 0 0 FFFFFF  H322  1 <> 1 0 0 0 0 0 0 <> <> 0 325 <> 0 0 1 <> <> <> <> <>
  326 41 13.513171 47.405886 -7.776302 51 R A 21 0.06000 0.06000 "ARG " " HA " "    " 1 0 0 0 FFFFFF  H323  1 <> 1 0 0 0 0 0 0 <> <> 0 326 <> 0 0 1 <> <> <> <> <>
  327 41 16.093442 47.065777 -6.167181 51 R A 21 0.06000 0.06000 "ARG " "1HB " "    " 1 0 0 0 FFFFFF  H324  1 <> 1 0 0 0 0 0 0 <> <> 0 327 <> 0 0 1 <> <> <> <> <>
  328 41 14.530039 46.721598 -5.516911 51 R A 21 0.06000 0.06000 "ARG " "2HB " "    " 1 0 0 0 FFFFFF  H325  1 <> 1 0 0 0 0 0 0 <> <> 0 328 <> 0 0 1 <> <> <> <> <>
  329 41 14.193759 44.839284 -6.938160 51 R A 21 0.06000 0.06000 "ARG " "1HG " "    " 1 0 0 0 FFFFFF  H326  1 <> 1 0 0 0 0 0 0 <> <> 0 329 <> 0 0 1 <> <> <> <> <>
  330 41 15.363573 45.378051 -8.105339 51 R A 21 0.06000 0.06000 "ARG " "2HG " "    " 1 0 0 0 FFFFFF  H327  1 <> 1 0 0 0 0 0 0 <> <> 0 330 <> 0 0 1 <> <> <> <> <>
  331 41 16.211395 43.454021 -6.788326 51 R A 21 0.06000 0.06000 "ARG " "1HD " "    " 1 0 0 0 FFFFFF  H328  1 <> 1 0 0 0 0 0 0 <> <> 0 331 <> 0 0 1 <> <> <> <> <>
  332 41 17.239525 44.853252 -6.693203 51 R A 21 0.06000 0.06000 "ARG " "2HD " "    " 1 0 0 0 FFFFFF  H329  1 <> 1 0 0 0 0 0 0 <> <> 0 332 <> 0 0 1 <> <> <> <> <>
  333 43 15.612441 45.144737 -4.455462 51 R A 21 0.44000 0.44000 "ARG " " HE " "    " 1 0 0 0 FFFFFF  H330  1 <> 1 0 0 0 0 0 0 <> <> 0 333 <> 0 0 1 <> <> <> <> <>
  334 43 18.458191 42.263273 -4.017723 51 R A 21 0.46000 0.46000 "ARG " "1HH1" "    " 1 0 0 0 FFFFFF  H331  1 <> 1 0 0 0 0 0 0 <> <> 0 334 <> 0 0 1 <> <> <> <> <>
  335 43 18.235737 42.922478 -5.589092 51 R A 21 0.46000 0.46000 "ARG " "2HH1" "    " 1 0 0 0 FFFFFF  H332  1 <> 1 0 0 0 0 0 0 <> <> 0 335 <> 0 0 1 <> <> <> <> <>
  336 44 17.083543 43.179187 -2.108964 51 R A 21 0.46000 0.46000 "ARG " "1HH2" "    " 1 0 0 0 FFFFFF  H333  1 <> 1 0 0 0 0 0 0 <> <> 0 336 <> 0 0 1 <> <> <> <> <>
  337 44 16.028516 44.527942 -2.565541 51 R A 21 0.46000 0.46000 "ARG " "2HH2" "    " 1 0 0 0 FFFFFF  H334  1 <> 1 0 0 0 0 0 0 <> <> 0 337 <> 0 0 1 <> <> <> <> <>
  338 25 15.167598 49.703549 -5.980581 52 M A 43 -0.50000 -0.50000 "MET " " N  " "    " 7 0 0 0 5757FF  N335  0 <> 1 0 0 0 0 0 0 <> <> 0 338 <> 0 0 1 <> <> <> <> <>
  339 3 15.144451 50.750924 -4.941796 52 M A 2 0.14000 0.14000 "MET " " CA " "    " 6 0 0 0 A0A0A0  C336  0 <> 1 0 0 0 0 0 0 <> <> 0 339 <> 0 0 1 <> <> <> <> <>
  340 2 14.102112 51.884046 -5.075400 52 M A 2 0.50000 0.50000 "MET " " C  " "    " 6 0 0 0 A0A0A0  C337  0 <> 1 0 0 0 0 0 0 <> <> 0 340 <> 0 0 1 <> <> <> <> <>
  341 15 13.786211 52.332349 -6.179128 52 M A 70 -0.50000 -0.50000 "MET " " O  " "    " 8 0 0 0 FF2F2F  O338  0 <> 1 0 0 0 0 0 0 <> <> 0 341 <> 0 0 1 <> <> <> <> <>
  342 3 16.570028 51.304416 -4.738166 52 M A 2 -0.12000 -0.12000 "MET " " CB " "    " 6 0 0 0 A0A0A0  C339  0 <> 1 0 0 0 0 0 0 <> <> 0 342 <> 0 0 1 <> <> <> <> <>
  343 3 17.450987 50.438847 -3.822061 52 M A 2 0.04750 0.04750 "MET " " CG " "    " 6 0 0 0 A0A0A0  C340  0 <> 1 0 0 0 0 0 0 <> <> 0 343 <> 0 0 1 <> <> <> <> <>
  344 49 19.234067 50.695643 -4.059932 52 M A 13 -0.33500 -0.33500 "MET " " SD " "    " 16 0 0 0 E1E11E  S341  0 <> 1 0 0 0 0 0 0 <> <> 0 344 <> 0 0 1 <> <> <> <> <>
  345 3 19.439607 52.424806 -3.601230 52 M A 2 -0.01250 -0.01250 "MET " " CE " "    " 6 0 0 0 A0A0A0  C342  0 <> 1 0 0 0 0 0 0 <> <> 0 345 <> 0 0 1 <> <> <> <> <>
  346 43 16.080224 49.262391 -6.113679 52 M A 21 0.30000 0.30000 "MET " " H  " "    " 1 0 0 0 FFFFFF  H343  0 <> 1 0 0 0 0 0 0 <> <> 0 346 <> 0 0 1 <> <> <> <> <>
  347 41 14.866919 50.217744 -4.030539 52 M A 21 0.06000 0.06000 "MET " " HA " "    " 1 0 0 0 FFFFFF  H344  0 <> 1 0 0 0 0 0 0 <> <> 0 347 <> 0 0 1 <> <> <> <> <>
  348 41 17.048417 51.404181 -5.711666 52 M A 21 0.06000 0.06000 "MET " "1HB " "    " 1 0 0 0 FFFFFF  H345  0 <> 1 0 0 0 0 0 0 <> <> 0 348 <> 0 0 1 <> <> <> <> <>
  349 41 16.536728 52.314182 -4.327507 52 M A 21 0.06000 0.06000 "MET " "2HB " "    " 1 0 0 0 FFFFFF  H346  0 <> 1 0 0 0 0 0 0 <> <> 0 349 <> 0 0 1 <> <> <> <> <>
  350 41 17.191189 50.589384 -2.774218 52 M A 21 0.06000 0.06000 "MET " "1HG " "    " 1 0 0 0 FFFFFF  H347  0 <> 1 0 0 0 0 0 0 <> <> 0 350 <> 0 0 1 <> <> <> <> <>
  351 41 17.255609 49.384865 -4.021423 52 M A 21 0.06000 0.06000 "MET " "2HG " "    " 1 0 0 0 FFFFFF  H348  0 <> 1 0 0 0 0 0 0 <> <> 0 351 <> 0 0 1 <> <> <> <> <>
  352 41 20.456239 52.758948 -3.799978 52 M A 21 0.06000 0.06000 "MET " "1HE " "    " 1 0 0 0 FFFFFF  H349  0 <> 1 0 0 0 0 0 0 <> <> 0 352 <> 0 0 1 <> <> <> <> <>
  353 41 18.756586 53.061140 -4.158018 52 M A 21 0.06000 0.06000 "MET " "2HE " "    " 1 0 0 0 FFFFFF  H350  0 <> 1 0 0 0 0 0 0 <> <> 0 353 <> 0 0 1 <> <> <> <> <>
  354 41 19.259161 52.531949 -2.536912 52 M A 21 0.06000 0.06000 "MET " "3HE " "    " 1 0 0 0 FFFFFF  H351  0 <> 1 0 0 0 0 0 0 <> <> 0 354 <> 0 0 1 <> <> <> <> <>
  355 25 13.587931 52.378553 -3.941943 53 S A 43 -0.50000 -0.50000 "SER " " N  " "    " 7 0 0 0 5757FF  N352  0 <> 1 0 0 0 0 0 0 <> <> 0 355 <> 0 0 1 <> <> <> <> <>
  356 3 12.469961 53.324240 -3.876622 53 S A 2 0.14000 0.14000 "SER " " CA " "    " 6 0 0 0 A0A0A0  C353  0 <> 1 0 0 0 0 0 0 <> <> 0 356 <> 0 0 1 <> <> <> <> <>
  357 2 12.848141 54.779134 -4.241938 53 S A 2 0.50000 0.50000 "SER " " C  " "    " 6 0 0 0 A0A0A0  C354  0 <> 1 0 0 0 0 0 0 <> <> 0 357 <> 0 0 1 <> <> <> <> <>
  358 15 12.127362 55.436178 -5.006000 53 S A 70 -0.50000 -0.50000 "SER " " O  " "    " 8 0 0 0 FF2F2F  O355  0 <> 1 0 0 0 0 0 0 <> <> 0 358 <> 0 0 1 <> <> <> <> <>
  359 3 11.928641 53.302132 -2.431251 53 S A 2 0.14500 0.14500 "SER " " CB " "    " 6 0 0 0 A0A0A0  C356  0 <> 1 0 0 0 0 0 0 <> <> 0 359 <> 0 0 1 <> <> <> <> <>
  360 16 11.224886 52.095626 -2.192953 53 S A 70 -0.68300 -0.68300 "SER " " OG " "    " 8 0 0 0 FF2F2F  O357  0 <> 1 0 0 0 0 0 0 <> <> 0 360 <> 0 0 1 <> <> <> <> <>
  361 43 13.909046 51.967540 -3.078279 53 S A 21 0.30000 0.30000 "SER " " H  " "    " 1 0 0 0 FFFFFF  H358  0 <> 1 0 0 0 0 0 0 <> <> 0 361 <> 0 0 1 <> <> <> <> <>
  362 41 11.684037 53.004746 -4.565048 53 S A 21 0.06000 0.06000 "SER " " HA " "    " 1 0 0 0 FFFFFF  H359  0 <> 1 0 0 0 0 0 0 <> <> 0 362 <> 0 0 1 <> <> <> <> <>
  363 41 12.728749 53.421013 -1.697283 53 S A 21 0.06000 0.06000 "SER " "1HB " "    " 1 0 0 0 FFFFFF  H360  0 <> 1 0 0 0 0 0 0 <> <> 0 363 <> 0 0 1 <> <> <> <> <>
  364 41 11.231547 54.126386 -2.265457 53 S A 21 0.06000 0.06000 "SER " "2HB " "    " 1 0 0 0 FFFFFF  H361  0 <> 1 0 0 0 0 0 0 <> <> 0 364 <> 0 0 1 <> <> <> <> <>
  365 42 11.781816 51.349352 -2.375835 53 S A 21 0.41800 0.41800 "SER " " HG " "    " 1 0 0 0 FFFFFF  H362  0 <> 1 0 0 0 0 0 0 <> <> 0 365 <> 0 0 1 <> <> <> <> <>
  366 25 13.941792 55.313096 -3.671249 54 F A 43 -0.50000 -0.50000 "PHE " " N  " "    " 7 0 0 0 5757FF  N363  0 <> 1 0 0 0 0 0 0 <> <> 0 366 <> 0 0 1 <> <> <> <> <>
  367 3 14.447507 56.684814 -3.860439 54 F A 2 0.14000 0.14000 "PHE " " CA " "    " 6 0 0 0 A0A0A0  C364  0 <> 1 0 0 0 0 0 0 <> <> 0 367 <> 0 0 1 <> <> <> <> <>
  368 2 13.435591 57.736853 -3.360169 54 F A 2 0.50000 0.50000 "PHE " " C  " "    " 6 0 0 0 A0A0A0  C365  0 <> 1 0 0 0 0 0 0 <> <> 0 368 <> 0 0 1 <> <> <> <> <>
  369 15 13.225739 58.766664 -4.003663 54 F A 70 -0.50000 -0.50000 "PHE " " O  " "    " 8 0 0 0 FF2F2F  O366  0 <> 1 0 0 0 0 0 0 <> <> 0 369 <> 0 0 1 <> <> <> <> <>
  370 3 14.901827 56.929388 -5.320431 54 F A 2 -0.00500 -0.00500 "PHE " " CB " "    " 6 0 0 0 A0A0A0  C367  0 <> 1 0 0 0 0 0 0 <> <> 0 370 <> 0 0 1 <> <> <> <> <>
  371 2 15.984754 55.978061 -5.787613 54 F A 2 -0.11500 -0.11500 "PHE " " CG " "    " 6 0 0 0 A0A0A0  C368  0 <> 1 0 0 0 0 0 0 <> <> 0 371 <> 0 0 1 <> <> <> <> <>
  372 2 15.643710 54.875371 -6.592803 54 F A 2 -0.11500 -0.11500 "PHE " " CD1" "    " 6 0 0 0 A0A0A0  C369  0 <> 1 0 0 0 0 0 0 <> <> 0 372 <> 0 0 1 <> <> <> <> <>
  373 2 17.330966 56.181141 -5.417329 54 F A 2 -0.11500 -0.11500 "PHE " " CD2" "    " 6 0 0 0 A0A0A0  C370  0 <> 1 0 0 0 0 0 0 <> <> 0 373 <> 0 0 1 <> <> <> <> <>
  374 2 16.637455 53.966932 -6.993255 54 F A 2 -0.11500 -0.11500 "PHE " " CE1" "    " 6 0 0 0 A0A0A0  C371  0 <> 1 0 0 0 0 0 0 <> <> 0 374 <> 0 0 1 <> <> <> <> <>
  375 2 18.325574 55.274623 -5.824123 54 F A 2 -0.11500 -0.11500 "PHE " " CE2" "    " 6 0 0 0 A0A0A0  C372  0 <> 1 0 0 0 0 0 0 <> <> 0 375 <> 0 0 1 <> <> <> <> <>
  376 2 17.973218 54.159646 -6.602704 54 F A 2 -0.11500 -0.11500 "PHE " " CZ " "    " 6 0 0 0 A0A0A0  C373  0 <> 1 0 0 0 0 0 0 <> <> 0 376 <> 0 0 1 <> <> <> <> <>
  377 43 14.499844 54.732449 -3.049162 54 F A 21 0.30000 0.30000 "PHE " " H  " "    " 1 0 0 0 FFFFFF  H374  0 <> 1 0 0 0 0 0 0 <> <> 0 377 <> 0 0 1 <> <> <> <> <>
  378 41 15.320773 56.791582 -3.218499 54 F A 21 0.06000 0.06000 "PHE " " HA " "    " 1 0 0 0 FFFFFF  H375  0 <> 1 0 0 0 0 0 0 <> <> 0 378 <> 0 0 1 <> <> <> <> <>
  379 41 14.059715 56.869610 -6.008591 54 F A 21 0.06000 0.06000 "PHE " "1HB " "    " 1 0 0 0 FFFFFF  H376  0 <> 1 0 0 0 0 0 0 <> <> 0 379 <> 0 0 1 <> <> <> <> <>
  380 41 15.281073 57.945106 -5.431647 54 F A 21 0.06000 0.06000 "PHE " "2HB " "    " 1 0 0 0 FFFFFF  H377  0 <> 1 0 0 0 0 0 0 <> <> 0 380 <> 0 0 1 <> <> <> <> <>
  381 41 14.617876 54.710426 -6.885683 54 F A 21 0.11500 0.11500 "PHE " " HD1" "    " 1 0 0 0 FFFFFF  H378  0 <> 1 0 0 0 0 0 0 <> <> 0 381 <> 0 0 1 <> <> <> <> <>
  382 41 17.621114 57.026697 -4.818814 54 F A 21 0.11500 0.11500 "PHE " " HD2" "    " 1 0 0 0 FFFFFF  H379  0 <> 1 0 0 0 0 0 0 <> <> 0 382 <> 0 0 1 <> <> <> <> <>
  383 41 16.375830 53.109571 -7.585317 54 F A 21 0.11500 0.11500 "PHE " " HE1" "    " 1 0 0 0 FFFFFF  H380  0 <> 1 0 0 0 0 0 0 <> <> 0 383 <> 0 0 1 <> <> <> <> <>
  384 41 19.357589 55.427979 -5.537618 54 F A 21 0.11500 0.11500 "PHE " " HE2" "    " 1 0 0 0 FFFFFF  H381  0 <> 1 0 0 0 0 0 0 <> <> 0 384 <> 0 0 1 <> <> <> <> <>
  385 41 18.730571 53.450259 -6.894263 54 F A 21 0.11500 0.11500 "PHE " " HZ " "    " 1 0 0 0 FFFFFF  H382  0 <> 1 0 0 0 0 0 0 <> <> 0 385 <> 0 0 1 <> <> <> <> <>
  386 25 12.701081 57.401813 -2.295774 55 K A 43 -0.50000 -0.50000 "LYS " " N  " "    " 7 0 0 0 5757FF  N383  0 <> 1 0 0 0 0 0 0 <> <> 0 386 <> 0 0 1 <> <> <> <> <>
  387 3 11.823358 58.248911 -1.497076 55 K A 2 0.14000 0.14000 "LYS " " CA " "    " 6 0 0 0 A0A0A0  C384  0 <> 1 0 0 0 0 0 0 <> <> 0 387 <> 0 0 1 <> <> <> <> <>
  388 2 12.183685 57.893561 -0.055387 55 K A 2 0.50000 0.50000 "LYS " " C  " "    " 6 0 0 0 A0A0A0  C385  0 <> 1 0 0 0 0 0 0 <> <> 0 388 <> 0 0 1 <> <> <> <> <>
  389 15 12.441137 56.714892 0.207144 55 K A 70 -0.50000 -0.50000 "LYS " " O  " "    " 8 0 0 0 FF2F2F  O386  0 <> 1 0 0 0 0 0 0 <> <> 0 389 <> 0 0 1 <> <> <> <> <>
  390 3 10.323784 57.919624 -1.739345 55 K A 2 -0.12000 -0.12000 "LYS " " CB " "    " 6 0 0 0 A0A0A0  C387  0 <> 1 0 0 0 0 0 0 <> <> 0 390 <> 0 0 1 <> <> <> <> <>
  391 3 9.867356 57.759429 -3.197020 55 K A 2 -0.12000 -0.12000 "LYS " " CG " "    " 6 0 0 0 A0A0A0  C388  0 <> 1 0 0 0 0 0 0 <> <> 0 391 <> 0 0 1 <> <> <> <> <>
  392 3 9.946745 59.055625 -4.020071 55 K A 2 -0.12000 -0.12000 "LYS " " CD " "    " 6 0 0 0 A0A0A0  C389  0 <> 1 0 0 0 0 0 0 <> <> 0 392 <> 0 0 1 <> <> <> <> <>
  393 3 10.096079 58.793001 -5.523559 55 K A 2 0.19000 0.19000 "LYS " " CE " "    " 6 0 0 0 A0A0A0  C390  0 <> 1 0 0 0 0 0 0 <> <> 0 393 <> 0 0 1 <> <> <> <> <>
  394 32 11.362370 58.102426 -5.805940 55 K A 43 -0.30000 -0.30000 "LYS " " NZ " "    " 7 1 0 0 5757FF  N391  0 <> 1 0 0 0 0 0 0 <> <> 0 394 <> 0 0 1 <> <> <> <> <>
  395 43 12.970270 56.560698 -1.798434 55 K A 21 0.30000 0.30000 "LYS " " H  " "    " 1 0 0 0 FFFFFF  H392  0 <> 1 0 0 0 0 0 0 <> <> 0 395 <> 0 0 1 <> <> <> <> <>
  396 41 12.037239 59.303685 -1.683123 55 K A 21 0.06000 0.06000 "LYS " " HA " "    " 1 0 0 0 FFFFFF  H393  0 <> 1 0 0 0 0 0 0 <> <> 0 396 <> 0 0 1 <> <> <> <> <>
  397 41 10.088261 56.977456 -1.242160 55 K A 21 0.06000 0.06000 "LYS " "1HB " "    " 1 0 0 0 FFFFFF  H394  0 <> 1 0 0 0 0 0 0 <> <> 0 397 <> 0 0 1 <> <> <> <> <>
  398 41 9.708967 58.669205 -1.237857 55 K A 21 0.06000 0.06000 "LYS " "2HB " "    " 1 0 0 0 FFFFFF  H395  0 <> 1 0 0 0 0 0 0 <> <> 0 398 <> 0 0 1 <> <> <> <> <>
  399 41 10.446974 56.955608 -3.646232 55 K A 21 0.06000 0.06000 "LYS " "1HG " "    " 1 0 0 0 FFFFFF  H396  0 <> 1 0 0 0 0 0 0 <> <> 0 399 <> 0 0 1 <> <> <> <> <>
  400 41 8.837228 57.400071 -3.208998 55 K A 21 0.06000 0.06000 "LYS " "2HG " "    " 1 0 0 0 FFFFFF  H397  0 <> 1 0 0 0 0 0 0 <> <> 0 400 <> 0 0 1 <> <> <> <> <>
  401 41 9.053728 59.654748 -3.834130 55 K A 21 0.06000 0.06000 "LYS " "1HD " "    " 1 0 0 0 FFFFFF  H398  0 <> 1 0 0 0 0 0 0 <> <> 0 401 <> 0 0 1 <> <> <> <> <>
  402 41 10.780024 59.674791 -3.685310 55 K A 21 0.06000 0.06000 "LYS " "2HD " "    " 1 0 0 0 FFFFFF  H399  0 <> 1 0 0 0 0 0 0 <> <> 0 402 <> 0 0 1 <> <> <> <> <>
  403 41 9.261115 58.208581 -5.912332 55 K A 21 0.06000 0.06000 "LYS " "1HE " "    " 1 0 0 0 FFFFFF  H400  0 <> 1 0 0 0 0 0 0 <> <> 0 403 <> 0 0 1 <> <> <> <> <>
  404 41 10.098971 59.743479 -6.059826 55 K A 21 0.06000 0.06000 "LYS " "2HE " "    " 1 0 0 0 FFFFFF  H401  0 <> 1 0 0 0 0 0 0 <> <> 0 404 <> 0 0 1 <> <> <> <> <>
  405 44 11.601300 58.196828 -6.799167 55 K A 21 0.33000 0.33000 "LYS " "1HZ " "    " 1 0 0 0 FFFFFF  H402  0 <> 1 0 0 0 0 0 0 <> <> 0 405 <> 0 0 1 <> <> <> <> <>
  406 44 12.106547 58.535324 -5.255549 55 K A 21 0.33000 0.33000 "LYS " "2HZ " "    " 1 0 0 0 FFFFFF  H403  0 <> 1 0 0 0 0 0 0 <> <> 0 406 <> 0 0 1 <> <> <> <> <>
  407 44 11.345852 57.118940 -5.553125 55 K A 21 0.33000 0.33000 "LYS " "3HZ " "    " 1 0 0 0 FFFFFF  H404  0 <> 1 0 0 0 0 0 0 <> <> 0 407 <> 0 0 1 <> <> <> <> <>
  408 25 12.180279 58.857892 0.869046 56 D A 43 -0.50000 -0.50000 "ASP " " N  " "    " 7 0 0 0 5757FF  N405  0 <> 1 0 0 0 0 0 0 <> <> 0 408 <> 0 0 1 <> <> <> <> <>
  409 3 12.256955 58.564572 2.301751 56 D A 2 0.14000 0.14000 "ASP " " CA " "    " 6 0 0 0 A0A0A0  C406  0 <> 1 0 0 0 0 0 0 <> <> 0 409 <> 0 0 1 <> <> <> <> <>
  410 2 10.864985 58.063132 2.727501 56 D A 2 0.50000 0.50000 "ASP " " C  " "    " 6 0 0 0 A0A0A0  C407  0 <> 1 0 0 0 0 0 0 <> <> 0 410 <> 0 0 1 <> <> <> <> <>
  411 15 9.848311 58.667470 2.375541 56 D A 70 -0.50000 -0.50000 "ASP " " O  " "    " 8 0 0 0 FF2F2F  O408  0 <> 1 0 0 0 0 0 0 <> <> 0 411 <> 0 0 1 <> <> <> <> <>
  412 3 12.667727 59.828000 3.086078 56 D A 2 -0.22000 -0.22000 "ASP " " CB " "    " 6 0 0 0 A0A0A0  C409  0 <> 1 0 0 0 0 0 0 <> <> 0 412 <> 0 0 1 <> <> <> <> <>
  413 2 13.188191 59.525380 4.492302 56 D A 2 0.70000 0.70000 "ASP " " CG " "    " 6 0 0 0 A0A0A0  C410  0 <> 1 0 0 0 0 0 0 <> <> 0 413 <> 0 0 1 <> <> <> <> <>
  414 18 12.844223 58.460424 5.050669 56 D A 70 -0.80000 -0.80000 "ASP " " OD1" "    " 8 -1 0 0 FF2F2F  O411  0 <> 1 0 0 0 0 0 0 <> <> 0 414 <> 0 0 1 <> <> <> <> <>
  415 15 13.974371 60.362988 4.990247 56 D A 70 -0.80000 -0.80000 "ASP " " OD2" "    " 8 0 0 0 FF2F2F  O412  0 <> 1 0 0 0 0 0 0 <> <> 0 415 <> 0 0 1 <> <> <> <> <>
  416 43 11.981610 59.808222 0.598577 56 D A 21 0.30000 0.30000 "ASP " " H  " "    " 1 0 0 0 FFFFFF  H413  0 <> 1 0 0 0 0 0 0 <> <> 0 416 <> 0 0 1 <> <> <> <> <>
  417 41 13.009937 57.788930 2.464733 56 D A 21 0.06000 0.06000 "ASP " " HA " "    " 1 0 0 0 FFFFFF  H414  0 <> 1 0 0 0 0 0 0 <> <> 0 417 <> 0 0 1 <> <> <> <> <>
  418 41 13.473236 60.330781 2.550955 56 D A 21 0.06000 0.06000 "ASP " "1HB " "    " 1 0 0 0 FFFFFF  H415  0 <> 1 0 0 0 0 0 0 <> <> 0 418 <> 0 0 1 <> <> <> <> <>
  419 41 11.843241 60.536844 3.159678 56 D A 21 0.06000 0.06000 "ASP " "2HB " "    " 1 0 0 0 FFFFFF  H416  0 <> 1 0 0 0 0 0 0 <> <> 0 419 <> 0 0 1 <> <> <> <> <>
  420 25 10.822641 56.903754 3.382402 57 I A 43 -0.50000 -0.50000 "ILE " " N  " "    " 7 0 0 0 5757FF  N417  0 <> 1 0 0 0 0 0 0 <> <> 0 420 <> 0 0 1 <> <> <> <> <>
  421 3 9.634016 56.100860 3.638639 57 I A 2 0.14000 0.14000 "ILE " " CA " "    " 6 0 0 0 A0A0A0  C418  0 <> 1 0 0 0 0 0 0 <> <> 0 421 <> 0 0 1 <> <> <> <> <>
  422 2 9.745473 55.526601 5.050790 57 I A 2 0.50000 0.50000 "ILE " " C  " "    " 6 0 0 0 A0A0A0  C419  0 <> 1 0 0 0 0 0 0 <> <> 0 422 <> 0 0 1 <> <> <> <> <>
  423 15 10.400362 54.501890 5.256352 57 I A 70 -0.50000 -0.50000 "ILE " " O  " "    " 8 0 0 0 FF2F2F  O420  0 <> 1 0 0 0 0 0 0 <> <> 0 423 <> 0 0 1 <> <> <> <> <>
  424 3 9.377976 55.053499 2.509538 57 I A 2 -0.06000 -0.06000 "ILE " " CB " "    " 6 0 0 0 A0A0A0  C421  0 <> 1 0 0 0 0 0 0 <> <> 0 424 <> 0 0 1 <> <> <> <> <>
  425 3 8.678223 55.706180 1.302345 57 I A 2 -0.18000 -0.18000 "ILE " " CG2" "    " 6 0 0 0 A0A0A0  C422  0 <> 1 0 0 0 0 0 0 <> <> 0 425 <> 0 0 1 <> <> <> <> <>
  426 3 10.647450 54.282936 2.062377 57 I A 2 -0.12000 -0.12000 "ILE " " CG1" "    " 6 0 0 0 A0A0A0  C423  0 <> 1 0 0 0 0 0 0 <> <> 0 426 <> 0 0 1 <> <> <> <> <>
  427 3 10.364491 53.045666 1.196939 57 I A 2 -0.18000 -0.18000 "ILE " " CD1" "    " 6 0 0 0 A0A0A0  C424  0 <> 1 0 0 0 0 0 0 <> <> 0 427 <> 0 0 1 <> <> <> <> <>
  428 43 11.697124 56.609903 3.797275 57 I A 21 0.30000 0.30000 "ILE " " H  " "    " 1 0 0 0 FFFFFF  H425  0 <> 1 0 0 0 0 0 0 <> <> 0 428 <> 0 0 1 <> <> <> <> <>
  429 41 8.767375 56.765188 3.661169 57 I A 21 0.06000 0.06000 "ILE " " HA " "    " 1 0 0 0 FFFFFF  H426  0 <> 1 0 0 0 0 0 0 <> <> 0 429 <> 0 0 1 <> <> <> <> <>
  430 41 8.675978 54.322670 2.915186 57 I A 21 0.06000 0.06000 "ILE " " HB " "    " 1 0 0 0 FFFFFF  H427  0 <> 1 0 0 0 0 0 0 <> <> 0 430 <> 0 0 1 <> <> <> <> <>
  431 41 8.380443 54.971718 0.555302 57 I A 21 0.06000 0.06000 "ILE " "1HG2" "    " 1 0 0 0 FFFFFF  H428  0 <> 1 0 0 0 0 0 0 <> <> 0 431 <> 0 0 1 <> <> <> <> <>
  432 41 7.776085 56.237507 1.606031 57 I A 21 0.06000 0.06000 "ILE " "2HG2" "    " 1 0 0 0 FFFFFF  H429  0 <> 1 0 0 0 0 0 0 <> <> 0 432 <> 0 0 1 <> <> <> <> <>
  433 41 9.332547 56.428782 0.818421 57 I A 21 0.06000 0.06000 "ILE " "3HG2" "    " 1 0 0 0 FFFFFF  H430  0 <> 1 0 0 0 0 0 0 <> <> 0 433 <> 0 0 1 <> <> <> <> <>
  434 41 11.310326 54.948854 1.514872 57 I A 21 0.06000 0.06000 "ILE " "1HG1" "    " 1 0 0 0 FFFFFF  H431  0 <> 1 0 0 0 0 0 0 <> <> 0 434 <> 0 0 1 <> <> <> <> <>
  435 41 11.220946 53.968159 2.930425 57 I A 21 0.06000 0.06000 "ILE " "2HG1" "    " 1 0 0 0 FFFFFF  H432  0 <> 1 0 0 0 0 0 0 <> <> 0 435 <> 0 0 1 <> <> <> <> <>
  436 41 11.287492 52.509941 0.973587 57 I A 21 0.06000 0.06000 "ILE " "1HD1" "    " 1 0 0 0 FFFFFF  H433  0 <> 1 0 0 0 0 0 0 <> <> 0 436 <> 0 0 1 <> <> <> <> <>
  437 41 9.687476 52.351327 1.694057 57 I A 21 0.06000 0.06000 "ILE " "2HD1" "    " 1 0 0 0 FFFFFF  H434  0 <> 1 0 0 0 0 0 0 <> <> 0 437 <> 0 0 1 <> <> <> <> <>
  438 41 9.921477 53.315508 0.238309 57 I A 21 0.06000 0.06000 "ILE " "3HD1" "    " 1 0 0 0 FFFFFF  H435  0 <> 1 0 0 0 0 0 0 <> <> 0 438 <> 0 0 1 <> <> <> <> <>
  439 25 9.135937 56.225571 6.013878 58 D A 43 -0.50000 -0.50000 "ASP " " N  " "    " 7 0 0 0 5757FF  N436  0 <> 1 0 0 0 0 0 0 <> <> 0 439 <> 0 0 1 <> <> <> <> <>
  440 3 9.186323 55.968438 7.451440 58 D A 2 0.14000 0.14000 "ASP " " CA " "    " 6 0 0 0 A0A0A0  C437  0 <> 1 0 0 0 0 0 0 <> <> 0 440 <> 0 0 1 <> <> <> <> <>
  441 2 8.790027 54.534439 7.845684 58 D A 2 0.50000 0.50000 "ASP " " C  " "    " 6 0 0 0 A0A0A0  C438  0 <> 1 0 0 0 0 0 0 <> <> 0 441 <> 0 0 1 <> <> <> <> <>
  442 15 7.680470 54.085137 7.561741 58 D A 70 -0.50000 -0.50000 "ASP " " O  " "    " 8 0 0 0 FF2F2F  O439  0 <> 1 0 0 0 0 0 0 <> <> 0 442 <> 0 0 1 <> <> <> <> <>
  443 3 8.337097 57.024271 8.194599 58 D A 2 -0.22000 -0.22000 "ASP " " CB " "    " 6 0 0 0 A0A0A0  C440  0 <> 1 0 0 0 0 0 0 <> <> 0 443 <> 0 0 1 <> <> <> <> <>
  444 2 8.515289 57.038027 9.710323 58 D A 2 0.70000 0.70000 "ASP " " CG " "    " 6 0 0 0 A0A0A0  C441  0 <> 1 0 0 0 0 0 0 <> <> 0 444 <> 0 0 1 <> <> <> <> <>
  445 18 7.936118 57.926682 10.370887 58 D A 70 -0.80000 -0.80000 "ASP " " OD2" "    " 8 -1 0 0 FF2F2F  O442  0 <> 1 0 0 0 0 0 0 <> <> 0 445 <> 0 0 1 <> <> <> <> <>
  446 15 9.349452 56.291872 10.266053 58 D A 70 -0.80000 -0.80000 "ASP " " OD1" "    " 8 0 0 0 FF2F2F  O443  0 <> 1 0 0 0 0 0 0 <> <> 0 446 <> 0 0 1 <> <> <> <> <>
  447 43 8.661282 57.065865 5.724902 58 D A 21 0.30000 0.30000 "ASP " " H  " "    " 1 0 0 0 FFFFFF  H444  0 <> 1 0 0 0 0 0 0 <> <> 0 447 <> 0 0 1 <> <> <> <> <>
  448 41 10.226162 56.126700 7.735723 58 D A 21 0.06000 0.06000 "ASP " " HA " "    " 1 0 0 0 FFFFFF  H445  0 <> 1 0 0 0 0 0 0 <> <> 0 448 <> 0 0 1 <> <> <> <> <>
  449 41 8.592192 58.021678 7.837104 58 D A 21 0.06000 0.06000 "ASP " "1HB " "    " 1 0 0 0 FFFFFF  H446  0 <> 1 0 0 0 0 0 0 <> <> 0 449 <> 0 0 1 <> <> <> <> <>
  450 41 7.278257 56.875677 7.980388 58 D A 21 0.06000 0.06000 "ASP " "2HB " "    " 1 0 0 0 FFFFFF  H447  0 <> 1 0 0 0 0 0 0 <> <> 0 450 <> 0 0 1 <> <> <> <> <>
  451 25 9.701934 53.846380 8.531693 59 G A 43 -0.50000 -0.50000 "GLY " " N  " "    " 7 0 0 0 5757FF  N448  0 <> 1 0 0 0 0 0 0 <> <> 0 451 <> 0 0 1 <> <> <> <> <>
  452 3 9.534626 52.525043 9.105440 59 G A 2 0.08000 0.08000 "GLY " " CA " "    " 6 0 0 0 A0A0A0  C449  0 <> 1 0 0 0 0 0 0 <> <> 0 452 <> 0 0 1 <> <> <> <> <>
  453 2 9.550869 52.549759 10.638648 59 G A 2 0.50000 0.50000 "GLY " " C  " "    " 6 0 0 0 A0A0A0  C450  0 <> 1 0 0 0 0 0 0 <> <> 0 453 <> 0 0 1 <> <> <> <> <>
  454 15 9.586518 51.476895 11.244235 59 G A 70 -0.50000 -0.50000 "GLY " " O  " "    " 8 0 0 0 FF2F2F  O451  0 <> 1 0 0 0 0 0 0 <> <> 0 454 <> 0 0 1 <> <> <> <> <>
  455 43 10.611562 54.277604 8.629453 59 G A 21 0.30000 0.30000 "GLY " " H  " "    " 1 0 0 0 FFFFFF  H452  0 <> 1 0 0 0 0 0 0 <> <> 0 455 <> 0 0 1 <> <> <> <> <>
  456 41 8.605958 52.058004 8.774082 59 G A 21 0.06000 0.06000 "GLY " "1HA " "    " 1 0 0 0 FFFFFF  H453  0 <> 1 0 0 0 0 0 0 <> <> 0 456 <> 0 0 1 <> <> <> <> <>
  457 41 10.345135 51.894413 8.744891 59 G A 21 0.06000 0.06000 "GLY " "2HA " "    " 1 0 0 0 FFFFFF  H454  0 <> 1 0 0 0 0 0 0 <> <> 0 457 <> 0 0 1 <> <> <> <> <>
  458 25 9.486570 53.731498 11.273777 60 G A 43 -0.50000 -0.50000 "GLY " " N  " "    " 7 0 0 0 5757FF  N455  0 <> 1 0 0 0 0 0 0 <> <> 0 458 <> 0 0 1 <> <> <> <> <>
  459 3 9.260353 53.903056 12.700915 60 G A 2 0.08000 0.08000 "GLY " " CA " "    " 6 0 0 0 A0A0A0  C456  0 <> 1 0 0 0 0 0 0 <> <> 0 459 <> 0 0 1 <> <> <> <> <>
  460 2 10.374571 54.674627 13.404980 60 G A 2 0.50000 0.50000 "GLY " " C  " "    " 6 0 0 0 A0A0A0  C457  0 <> 1 0 0 0 0 0 0 <> <> 0 460 <> 0 0 1 <> <> <> <> <>
  461 15 10.520373 55.880832 13.191064 60 G A 70 -0.50000 -0.50000 "GLY " " O  " "    " 8 0 0 0 FF2F2F  O458  0 <> 1 0 0 0 0 0 0 <> <> 0 461 <> 0 0 1 <> <> <> <> <>
  462 43 9.469524 54.599187 10.720077 60 G A 21 0.30000 0.30000 "GLY " " H  " "    " 1 0 0 0 FFFFFF  H459  0 <> 1 0 0 0 0 0 0 <> <> 0 462 <> 0 0 1 <> <> <> <> <>
  463 41 8.338629 54.474029 12.812016 60 G A 21 0.06000 0.06000 "GLY " "1HA " "    " 1 0 0 0 FFFFFF  H460  0 <> 1 0 0 0 0 0 0 <> <> 0 463 <> 0 0 1 <> <> <> <> <>
  464 41 9.087834 52.957411 13.200393 60 G A 21 0.06000 0.06000 "GLY " "2HA " "    " 1 0 0 0 FFFFFF  H461  0 <> 1 0 0 0 0 0 0 <> <> 0 464 <> 0 0 1 <> <> <> <> <>
  465 25 11.092297 54.021247 14.332082 61 V A 43 -0.50000 -0.50000 "VAL " " N  " "    " 7 0 0 0 5757FF  N462  0 <> 1 0 0 0 0 0 0 <> <> 0 465 <> 0 0 1 <> <> <> <> <>
  466 3 12.132712 54.649928 15.155822 61 V A 2 0.14000 0.14000 "VAL " " CA " "    " 6 0 0 0 A0A0A0  C463  0 <> 1 0 0 0 0 0 0 <> <> 0 466 <> 0 0 1 <> <> <> <> <>
  467 2 13.377349 55.004529 14.317760 61 V A 2 0.50000 0.50000 "VAL " " C  " "    " 6 0 0 0 A0A0A0  C464  0 <> 1 0 0 0 0 0 0 <> <> 0 467 <> 0 0 1 <> <> <> <> <>
  468 15 13.873010 56.127104 14.400251 61 V A 70 -0.50000 -0.50000 "VAL " " O  " "    " 8 0 0 0 FF2F2F  O465  0 <> 1 0 0 0 0 0 0 <> <> 0 468 <> 0 0 1 <> <> <> <> <>
  469 3 12.477427 53.743374 16.372563 61 V A 2 -0.06000 -0.06000 "VAL " " CB " "    " 6 0 0 0 A0A0A0  C466  0 <> 1 0 0 0 0 0 0 <> <> 0 469 <> 0 0 1 <> <> <> <> <>
  470 3 11.261720 53.579222 17.303434 61 V A 2 -0.18000 -0.18000 "VAL " " CG1" "    " 6 0 0 0 A0A0A0  C467  0 <> 1 0 0 0 0 0 0 <> <> 0 470 <> 0 0 1 <> <> <> <> <>
  471 3 13.080029 52.363787 16.030546 61 V A 2 -0.18000 -0.18000 "VAL " " CG2" "    " 6 0 0 0 A0A0A0  C468  0 <> 1 0 0 0 0 0 0 <> <> 0 471 <> 0 0 1 <> <> <> <> <>
  472 43 10.889227 53.037848 14.491012 61 V A 21 0.30000 0.30000 "VAL " " H  " "    " 1 0 0 0 FFFFFF  H469  0 <> 1 0 0 0 0 0 0 <> <> 0 472 <> 0 0 1 <> <> <> <> <>
  473 41 11.737497 55.593070 15.537513 61 V A 21 0.06000 0.06000 "VAL " " HA " "    " 1 0 0 0 FFFFFF  H470  0 <> 1 0 0 0 0 0 0 <> <> 0 473 <> 0 0 1 <> <> <> <> <>
  474 41 13.236096 54.273157 16.949236 61 V A 21 0.06000 0.06000 "VAL " " HB " "    " 1 0 0 0 FFFFFF  H471  0 <> 1 0 0 0 0 0 0 <> <> 0 474 <> 0 0 1 <> <> <> <> <>
  475 41 11.526863 53.014574 18.197411 61 V A 21 0.06000 0.06000 "VAL " "1HG1" "    " 1 0 0 0 FFFFFF  H472  0 <> 1 0 0 0 0 0 0 <> <> 0 475 <> 0 0 1 <> <> <> <> <>
  476 41 10.879411 54.546249 17.626158 61 V A 21 0.06000 0.06000 "VAL " "2HG1" "    " 1 0 0 0 FFFFFF  H473  0 <> 1 0 0 0 0 0 0 <> <> 0 476 <> 0 0 1 <> <> <> <> <>
  477 41 10.445300 53.047122 16.816449 61 V A 21 0.06000 0.06000 "VAL " "3HG1" "    " 1 0 0 0 FFFFFF  H474  0 <> 1 0 0 0 0 0 0 <> <> 0 477 <> 0 0 1 <> <> <> <> <>
  478 41 13.224755 51.765350 16.929521 61 V A 21 0.06000 0.06000 "VAL " "1HG2" "    " 1 0 0 0 FFFFFF  H475  0 <> 1 0 0 0 0 0 0 <> <> 0 478 <> 0 0 1 <> <> <> <> <>
  479 41 12.452434 51.792618 15.350108 61 V A 21 0.06000 0.06000 "VAL " "2HG2" "    " 1 0 0 0 FFFFFF  H476  0 <> 1 0 0 0 0 0 0 <> <> 0 479 <> 0 0 1 <> <> <> <> <>
  480 41 14.060038 52.460066 15.566690 61 V A 21 0.06000 0.06000 "VAL " "3HG2" "    " 1 0 0 0 FFFFFF  H477  0 <> 1 0 0 0 0 0 0 <> <> 0 480 <> 0 0 1 <> <> <> <> <>
  481 25 13.803346 54.068868 13.464909 62 W A 43 -0.50000 -0.50000 "TRP " " N  " "    " 7 0 0 0 5757FF  N478  0 <> 1 0 0 0 0 0 0 <> <> 0 481 <> 0 0 1 <> <> <> <> <>
  482 3 14.751671 54.252395 12.380862 62 W A 2 0.14000 0.14000 "TRP " " CA " "    " 6 0 0 0 A0A0A0  C479  0 <> 1 0 0 0 0 0 0 <> <> 0 482 <> 0 0 1 <> <> <> <> <>
  483 2 13.851326 54.305912 11.145177 62 W A 2 0.50000 0.50000 "TRP " " C  " "    " 6 0 0 0 A0A0A0  C480  0 <> 1 0 0 0 0 0 0 <> <> 0 483 <> 0 0 1 <> <> <> <> <>
  484 15 13.164953 53.331288 10.833564 62 W A 70 -0.50000 -0.50000 "TRP " " O  " "    " 8 0 0 0 FF2F2F  O481  0 <> 1 0 0 0 0 0 0 <> <> 0 484 <> 0 0 1 <> <> <> <> <>
  485 3 15.660442 53.010079 12.320962 62 W A 2 -0.12000 -0.12000 "TRP " " CB " "    " 6 0 0 0 A0A0A0  C482  0 <> 1 0 0 0 0 0 0 <> <> 0 485 <> 0 0 1 <> <> <> <> <>
  486 2 16.616803 52.862329 11.176580 62 W A 2 0.07500 0.07500 "TRP " " CG " "    " 6 0 0 0 A0A0A0  C483  0 <> 1 0 0 0 0 0 0 <> <> 0 486 <> 0 0 1 <> <> <> <> <>
  487 2 17.137573 51.614114 10.634326 62 W A 2 -0.05500 -0.05500 "TRP " " CD2" "    " 6 0 0 0 A0A0A0  C484  0 <> 1 0 0 0 0 0 0 <> <> 0 487 <> 0 0 1 <> <> <> <> <>
  488 2 18.015866 51.921652 9.553850 62 W A 2 0.13000 0.13000 "TRP " " CE2" "    " 6 0 0 0 A0A0A0  C485  0 <> 1 0 0 0 0 0 0 <> <> 0 488 <> 0 0 1 <> <> <> <> <>
  489 2 16.949260 50.245025 10.940299 62 W A 2 -0.11500 -0.11500 "TRP " " CE3" "    " 6 0 0 0 A0A0A0  C486  0 <> 1 0 0 0 0 0 0 <> <> 0 489 <> 0 0 1 <> <> <> <> <>
  490 2 17.166712 53.852159 10.431706 62 W A 2 -0.11500 -0.11500 "TRP " " CD1" "    " 6 0 0 0 A0A0A0  C487  0 <> 1 0 0 0 0 0 0 <> <> 0 490 <> 0 0 1 <> <> <> <> <>
  491 25 17.976420 53.295954 9.460638 62 W A 43 -0.57000 -0.57000 "TRP " " NE1" "    " 7 0 0 0 5757FF  N488  0 <> 1 0 0 0 0 0 0 <> <> 0 491 <> 0 0 1 <> <> <> <> <>
  492 2 18.678449 50.921643 8.827076 62 W A 2 -0.11500 -0.11500 "TRP " " CZ2" "    " 6 0 0 0 A0A0A0  C489  0 <> 1 0 0 0 0 0 0 <> <> 0 492 <> 0 0 1 <> <> <> <> <>
  493 2 17.598163 49.233007 10.203616 62 W A 2 -0.11500 -0.11500 "TRP " " CZ3" "    " 6 0 0 0 A0A0A0  C490  0 <> 1 0 0 0 0 0 0 <> <> 0 493 <> 0 0 1 <> <> <> <> <>
  494 2 18.472428 49.573251 9.157320 62 W A 2 -0.11500 -0.11500 "TRP " " CH2" "    " 6 0 0 0 A0A0A0  C491  0 <> 1 0 0 0 0 0 0 <> <> 0 494 <> 0 0 1 <> <> <> <> <>
  495 43 13.253636 53.225416 13.409189 62 W A 21 0.30000 0.30000 "TRP " " H  " "    " 1 0 0 0 FFFFFF  H492  0 <> 1 0 0 0 0 0 0 <> <> 0 495 <> 0 0 1 <> <> <> <> <>
  496 41 15.343605 55.162474 12.499084 62 W A 21 0.06000 0.06000 "TRP " " HA " "    " 1 0 0 0 FFFFFF  H493  0 <> 1 0 0 0 0 0 0 <> <> 0 496 <> 0 0 1 <> <> <> <> <>
  497 41 16.265276 52.967084 13.222283 62 W A 21 0.06000 0.06000 "TRP " "1HB " "    " 1 0 0 0 FFFFFF  H494  0 <> 1 0 0 0 0 0 0 <> <> 0 497 <> 0 0 1 <> <> <> <> <>
  498 41 15.044203 52.110241 12.330381 62 W A 21 0.06000 0.06000 "TRP " "2HB " "    " 1 0 0 0 FFFFFF  H495  0 <> 1 0 0 0 0 0 0 <> <> 0 498 <> 0 0 1 <> <> <> <> <>
  499 41 16.294371 49.970826 11.752520 62 W A 21 0.11500 0.11500 "TRP " " HE3" "    " 1 0 0 0 FFFFFF  H496  0 <> 1 0 0 0 0 0 0 <> <> 0 499 <> 0 0 1 <> <> <> <> <>
  500 41 16.993958 54.908507 10.582414 62 W A 21 0.11500 0.11500 "TRP " " HD1" "    " 1 0 0 0 FFFFFF  H497  0 <> 1 0 0 0 0 0 0 <> <> 0 500 <> 0 0 1 <> <> <> <> <>
  501 43 18.503899 53.824720 8.772653 62 W A 21 0.42000 0.42000 "TRP " " HE1" "    " 1 0 0 0 FFFFFF  H498  0 <> 1 0 0 0 0 0 0 <> <> 0 501 <> 0 0 1 <> <> <> <> <>
  502 41 19.317245 51.168807 7.995331 62 W A 21 0.11500 0.11500 "TRP " " HZ2" "    " 1 0 0 0 FFFFFF  H499  0 <> 1 0 0 0 0 0 0 <> <> 0 502 <> 0 0 1 <> <> <> <> <>
  503 41 17.434302 48.190823 10.437634 62 W A 21 0.11500 0.11500 "TRP " " HZ3" "    " 1 0 0 0 FFFFFF  H500  0 <> 1 0 0 0 0 0 0 <> <> 0 503 <> 0 0 1 <> <> <> <> <>
  504 41 18.980439 48.808356 8.591186 62 W A 21 0.11500 0.11500 "TRP " " HH2" "    " 1 0 0 0 FFFFFF  H501  0 <> 1 0 0 0 0 0 0 <> <> 0 504 <> 0 0 1 <> <> <> <> <>
  505 25 13.783886 55.476324 10.508624 63 K A 43 -0.50000 -0.50000 "LYS " " N  " "    " 7 0 0 0 5757FF  N502  0 <> 1 0 0 0 0 0 0 <> <> 0 505 <> 0 0 1 <> <> <> <> <>
  506 3 12.768088 55.779817 9.506460 63 K A 2 0.14000 0.14000 "LYS " " CA " "    " 6 0 0 0 A0A0A0  C503  0 <> 1 0 0 0 0 0 0 <> <> 0 506 <> 0 0 1 <> <> <> <> <>
  507 2 13.135835 55.174534 8.150842 63 K A 2 0.50000 0.50000 "LYS " " C  " "    " 6 0 0 0 A0A0A0  C504  0 <> 1 0 0 0 0 0 0 <> <> 0 507 <> 0 0 1 <> <> <> <> <>
  508 15 12.328253 54.469221 7.550629 63 K A 70 -0.50000 -0.50000 "LYS " " O  " "    " 8 0 0 0 FF2F2F  O505  0 <> 1 0 0 0 0 0 0 <> <> 0 508 <> 0 0 1 <> <> <> <> <>
  509 3 12.638363 57.311918 9.385393 63 K A 2 -0.12000 -0.12000 "LYS " " CB " "    " 6 0 0 0 A0A0A0  C506  0 <> 1 0 0 0 0 0 0 <> <> 0 509 <> 0 0 1 <> <> <> <> <>
  510 3 12.242802 57.932677 10.738145 63 K A 2 -0.12000 -0.12000 "LYS " " CG " "    " 6 0 0 0 A0A0A0  C507  0 <> 1 0 0 0 0 0 0 <> <> 0 510 <> 0 0 1 <> <> <> <> <>
  511 3 11.321001 59.156036 10.624811 63 K A 2 -0.12000 -0.12000 "LYS " " CD " "    " 6 0 0 0 A0A0A0  C508  0 <> 1 0 0 0 0 0 0 <> <> 0 511 <> 0 0 1 <> <> <> <> <>
  512 3 10.541779 59.416749 11.923834 63 K A 2 0.19000 0.19000 "LYS " " CE " "    " 6 0 0 0 A0A0A0  C509  0 <> 1 0 0 0 0 0 0 <> <> 0 512 <> 0 0 1 <> <> <> <> <>
  513 32 9.618476 58.312422 12.238757 63 K A 43 -0.30000 -0.30000 "LYS " " NZ " "    " 7 1 0 0 5757FF  N510  0 <> 1 0 0 0 0 0 0 <> <> 0 513 <> 0 0 1 <> <> <> <> <>
  514 43 14.346644 56.237668 10.853207 63 K A 21 0.30000 0.30000 "LYS " " H  " "    " 1 0 0 0 FFFFFF  H511  0 <> 1 0 0 0 0 0 0 <> <> 0 514 <> 0 0 1 <> <> <> <> <>
  515 41 11.809107 55.362251 9.820596 63 K A 21 0.06000 0.06000 "LYS " " HA " "    " 1 0 0 0 FFFFFF  H512  0 <> 1 0 0 0 0 0 0 <> <> 0 515 <> 0 0 1 <> <> <> <> <>
  516 41 13.552526 57.774424 9.008080 63 K A 21 0.06000 0.06000 "LYS " "1HB " "    " 1 0 0 0 FFFFFF  H513  0 <> 1 0 0 0 0 0 0 <> <> 0 516 <> 0 0 1 <> <> <> <> <>
  517 41 11.874636 57.529039 8.636242 63 K A 21 0.06000 0.06000 "LYS " "2HB " "    " 1 0 0 0 FFFFFF  H514  0 <> 1 0 0 0 0 0 0 <> <> 0 517 <> 0 0 1 <> <> <> <> <>
  518 41 11.730925 57.160451 11.308995 63 K A 21 0.06000 0.06000 "LYS " "1HG " "    " 1 0 0 0 FFFFFF  H515  0 <> 1 0 0 0 0 0 0 <> <> 0 518 <> 0 0 1 <> <> <> <> <>
  519 41 13.132523 58.177528 11.319631 63 K A 21 0.06000 0.06000 "LYS " "2HG " "    " 1 0 0 0 FFFFFF  H516  0 <> 1 0 0 0 0 0 0 <> <> 0 519 <> 0 0 1 <> <> <> <> <>
  520 41 11.913411 60.031589 10.354580 63 K A 21 0.06000 0.06000 "LYS " "1HD " "    " 1 0 0 0 FFFFFF  H517  0 <> 1 0 0 0 0 0 0 <> <> 0 520 <> 0 0 1 <> <> <> <> <>
  521 41 10.609073 59.021875 9.808814 63 K A 21 0.06000 0.06000 "LYS " "2HD " "    " 1 0 0 0 FFFFFF  H518  0 <> 1 0 0 0 0 0 0 <> <> 0 521 <> 0 0 1 <> <> <> <> <>
  522 41 11.230083 59.562316 12.756807 63 K A 21 0.06000 0.06000 "LYS " "1HE " "    " 1 0 0 0 FFFFFF  H519  0 <> 1 0 0 0 0 0 0 <> <> 0 522 <> 0 0 1 <> <> <> <> <>
  523 41 9.957817 60.331938 11.819553 63 K A 21 0.06000 0.06000 "LYS " "2HE " "    " 1 0 0 0 FFFFFF  H520  0 <> 1 0 0 0 0 0 0 <> <> 0 523 <> 0 0 1 <> <> <> <> <>
  524 44 9.050284 58.467172 13.046870 63 K A 21 0.33000 0.33000 "LYS " "1HZ " "    " 1 0 0 0 FFFFFF  H521  0 <> 1 0 0 0 0 0 0 <> <> 0 524 <> 0 0 1 <> <> <> <> <>
  525 44 8.963799 58.159425 11.437342 63 K A 21 0.33000 0.33000 "LYS " "2HZ " "    " 1 0 0 0 FFFFFF  H522  0 <> 1 0 0 0 0 0 0 <> <> 0 525 <> 0 0 1 <> <> <> <> <>
  526 44 10.089513 57.410825 12.311147 63 K A 21 0.33000 0.33000 "LYS " "3HZ " "    " 1 0 0 0 FFFFFF  H523  0 <> 1 0 0 0 0 0 0 <> <> 0 526 <> 0 0 1 <> <> <> <> <>
  527 25 14.371719 55.399931 7.699127 64 Q A 43 -0.50000 -0.50000 "GLN " " N  " "    " 7 0 0 0 5757FF  N524  0 <> 1 0 0 0 0 0 0 <> <> 0 527 <> 0 0 1 <> <> <> <> <>
  528 3 14.853312 54.962805 6.392835 64 Q A 2 0.14000 0.14000 "GLN " " CA " "    " 6 0 0 0 A0A0A0  C525  0 <> 1 0 0 0 0 0 0 <> <> 0 528 <> 0 0 1 <> <> <> <> <>
  529 2 15.055050 53.438661 6.331152 64 Q A 2 0.50000 0.50000 "GLN " " C  " "    " 6 0 0 0 A0A0A0  C526  0 <> 1 0 0 0 0 0 0 <> <> 0 529 <> 0 0 1 <> <> <> <> <>
  530 15 14.826441 52.861267 5.271735 64 Q A 70 -0.50000 -0.50000 "GLN " " O  " "    " 8 0 0 0 FF2F2F  O527  0 <> 1 0 0 0 0 0 0 <> <> 0 530 <> 0 0 1 <> <> <> <> <>
  531 3 16.126603 55.752180 6.067968 64 Q A 2 -0.12000 -0.12000 "GLN " " CB " "    " 6 0 0 0 A0A0A0  C528  0 <> 1 0 0 0 0 0 0 <> <> 0 531 <> 0 0 1 <> <> <> <> <>
  532 3 15.739239 57.212789 5.733777 64 Q A 2 -0.12000 -0.12000 "GLN " " CG " "    " 6 0 0 0 A0A0A0  C529  0 <> 1 0 0 0 0 0 0 <> <> 0 532 <> 0 0 1 <> <> <> <> <>
  533 2 16.816626 58.252793 5.997672 64 Q A 2 0.50000 0.50000 "GLN " " CD " "    " 6 0 0 0 A0A0A0  C530  0 <> 1 0 0 0 0 0 0 <> <> 0 533 <> 0 0 1 <> <> <> <> <>
  534 15 17.961677 57.926731 6.299182 64 Q A 70 -0.50000 -0.50000 "GLN " " OE1" "    " 8 0 0 0 FF2F2F  O531  0 <> 1 0 0 0 0 0 0 <> <> 0 534 <> 0 0 1 <> <> <> <> <>
  535 25 16.440393 59.518353 5.901968 64 Q A 43 -0.76000 -0.76000 "GLN " " NE2" "    " 7 0 0 0 5757FF  N532  0 <> 1 0 0 0 0 0 0 <> <> 0 535 <> 0 0 1 <> <> <> <> <>
  536 43 14.969701 56.014644 8.226616 64 Q A 21 0.30000 0.30000 "GLN " " H  " "    " 1 0 0 0 FFFFFF  H533  0 <> 1 0 0 0 0 0 0 <> <> 0 536 <> 0 0 1 <> <> <> <> <>
  537 41 14.097489 55.211114 5.642862 64 Q A 21 0.06000 0.06000 "GLN " " HA " "    " 1 0 0 0 FFFFFF  H534  0 <> 1 0 0 0 0 0 0 <> <> 0 537 <> 0 0 1 <> <> <> <> <>
  538 41 16.828352 55.698210 6.901751 64 Q A 21 0.06000 0.06000 "GLN " "1HB " "    " 1 0 0 0 FFFFFF  H535  0 <> 1 0 0 0 0 0 0 <> <> 0 538 <> 0 0 1 <> <> <> <> <>
  539 41 16.641114 55.312518 5.211882 64 Q A 21 0.06000 0.06000 "GLN " "2HB " "    " 1 0 0 0 FFFFFF  H536  0 <> 1 0 0 0 0 0 0 <> <> 0 539 <> 0 0 1 <> <> <> <> <>
  540 41 15.407167 57.289122 4.697651 64 Q A 21 0.06000 0.06000 "GLN " "1HG " "    " 1 0 0 0 FFFFFF  H537  0 <> 1 0 0 0 0 0 0 <> <> 0 540 <> 0 0 1 <> <> <> <> <>
  541 41 14.882932 57.526479 6.330817 64 Q A 21 0.06000 0.06000 "GLN " "2HG " "    " 1 0 0 0 FFFFFF  H538  0 <> 1 0 0 0 0 0 0 <> <> 0 541 <> 0 0 1 <> <> <> <> <>
  542 43 17.131067 60.255711 6.032269 64 Q A 21 0.38000 0.38000 "GLN " "1HE2" "    " 1 0 0 0 FFFFFF  H539  0 <> 1 0 0 0 0 0 0 <> <> 0 542 <> 0 0 1 <> <> <> <> <>
  543 43 15.476023 59.767258 5.614136 64 Q A 21 0.38000 0.38000 "GLN " "2HE2" "    " 1 0 0 0 FFFFFF  H540  0 <> 1 0 0 0 0 0 0 <> <> 0 543 <> 0 0 1 <> <> <> <> <>
  544 25 15.244272 52.773251 7.477476 65 G A 43 -0.50000 -0.50000 "GLY " " N  " "    " 7 0 0 0 5757FF  N541  0 <> 1 0 0 0 0 0 0 <> <> 0 544 <> 0 0 1 <> <> <> <> <>
  545 3 15.169395 51.324371 7.637705 65 G A 2 0.08000 0.08000 "GLY " " CA " "    " 6 0 0 0 A0A0A0  C542  0 <> 1 0 0 0 0 0 0 <> <> 0 545 <> 0 0 1 <> <> <> <> <>
  546 2 13.816085 50.981465 8.263522 65 G A 2 0.50000 0.50000 "GLY " " C  " "    " 6 0 0 0 A0A0A0  C543  0 <> 1 0 0 0 0 0 0 <> <> 0 546 <> 0 0 1 <> <> <> <> <>
  547 15 12.787518 51.306761 7.663880 65 G A 70 -0.50000 -0.50000 "GLY " " O  " "    " 8 0 0 0 FF2F2F  O544  0 <> 1 0 0 0 0 0 0 <> <> 0 547 <> 0 0 1 <> <> <> <> <>
  548 43 15.368887 53.317132 8.317420 65 G A 21 0.30000 0.30000 "GLY " " H  " "    " 1 0 0 0 FFFFFF  H545  0 <> 1 0 0 0 0 0 0 <> <> 0 548 <> 0 0 1 <> <> <> <> <>
  549 41 15.291778 50.801798 6.690088 65 G A 21 0.06000 0.06000 "GLY " "1HA " "    " 1 0 0 0 FFFFFF  H546  0 <> 1 0 0 0 0 0 0 <> <> 0 549 <> 0 0 1 <> <> <> <> <>
  550 41 15.972367 50.964345 8.268385 65 G A 21 0.06000 0.06000 "GLY " "2HA " "    " 1 0 0 0 FFFFFF  H547  0 <> 1 0 0 0 0 0 0 <> <> 0 550 <> 0 0 1 <> <> <> <> <>
  551 25 13.771923 50.312674 9.423078 66 W A 43 -0.50000 -0.50000 "TRP " " N  " "    " 7 0 0 0 5757FF  N548  0 <> 1 0 0 0 0 0 0 <> <> 0 551 <> 0 0 1 <> <> <> <> <>
  552 3 12.518894 49.970946 10.098380 66 W A 2 0.14000 0.14000 "TRP " " CA " "    " 6 0 0 0 A0A0A0  C549  0 <> 1 0 0 0 0 0 0 <> <> 0 552 <> 0 0 1 <> <> <> <> <>
  553 2 12.691324 49.733260 11.604274 66 W A 2 0.50000 0.50000 "TRP " " C  " "    " 6 0 0 0 A0A0A0  C550  0 <> 1 0 0 0 0 0 0 <> <> 0 553 <> 0 0 1 <> <> <> <> <>
  554 15 13.806357 49.704823 12.128425 66 W A 70 -0.50000 -0.50000 "TRP " " O  " "    " 8 0 0 0 FF2F2F  O551  0 <> 1 0 0 0 0 0 0 <> <> 0 554 <> 0 0 1 <> <> <> <> <>
  555 3 11.778264 48.811456 9.379231 66 W A 2 -0.12000 -0.12000 "TRP " " CB " "    " 6 0 0 0 A0A0A0  C552  0 <> 1 0 0 0 0 0 0 <> <> 0 555 <> 0 0 1 <> <> <> <> <>
  556 2 12.278215 47.413076 9.616902 66 W A 2 0.07500 0.07500 "TRP " " CG " "    " 6 0 0 0 A0A0A0  C553  0 <> 1 0 0 0 0 0 0 <> <> 0 556 <> 0 0 1 <> <> <> <> <>
  557 2 13.520416 46.779247 9.175926 66 W A 2 -0.05500 -0.05500 "TRP " " CD2" "    " 6 0 0 0 A0A0A0  C554  0 <> 1 0 0 0 0 0 0 <> <> 0 557 <> 0 0 1 <> <> <> <> <>
  558 2 13.536172 45.433147 9.656640 66 W A 2 0.13000 0.13000 "TRP " " CE2" "    " 6 0 0 0 A0A0A0  C555  0 <> 1 0 0 0 0 0 0 <> <> 0 558 <> 0 0 1 <> <> <> <> <>
  559 2 14.633907 47.191786 8.406358 66 W A 2 -0.11500 -0.11500 "TRP " " CE3" "    " 6 0 0 0 A0A0A0  C556  0 <> 1 0 0 0 0 0 0 <> <> 0 559 <> 0 0 1 <> <> <> <> <>
  560 2 11.608663 46.463483 10.309770 66 W A 2 -0.11500 -0.11500 "TRP " " CD1" "    " 6 0 0 0 A0A0A0  C557  0 <> 1 0 0 0 0 0 0 <> <> 0 560 <> 0 0 1 <> <> <> <> <>
  561 25 12.345697 45.298940 10.336541 66 W A 43 -0.57000 -0.57000 "TRP " " NE1" "    " 7 0 0 0 5757FF  N558  0 <> 1 0 0 0 0 0 0 <> <> 0 561 <> 0 0 1 <> <> <> <> <>
  562 2 14.599975 44.551609 9.399088 66 W A 2 -0.11500 -0.11500 "TRP " " CZ2" "    " 6 0 0 0 A0A0A0  C559  0 <> 1 0 0 0 0 0 0 <> <> 0 562 <> 0 0 1 <> <> <> <> <>
  563 2 15.709444 46.319805 8.148898 66 W A 2 -0.11500 -0.11500 "TRP " " CZ3" "    " 6 0 0 0 A0A0A0  C560  0 <> 1 0 0 0 0 0 0 <> <> 0 563 <> 0 0 1 <> <> <> <> <>
  564 2 15.696704 45.003374 8.646165 66 W A 2 -0.11500 -0.11500 "TRP " " CH2" "    " 6 0 0 0 A0A0A0  C561  0 <> 1 0 0 0 0 0 0 <> <> 0 564 <> 0 0 1 <> <> <> <> <>
  565 43 14.626500 50.095674 9.919498 66 W A 21 0.30000 0.30000 "TRP " " H  " "    " 1 0 0 0 FFFFFF  H562  0 <> 1 0 0 0 0 0 0 <> <> 0 565 <> 0 0 1 <> <> <> <> <>
  566 41 11.895649 50.861321 10.035389 66 W A 21 0.06000 0.06000 "TRP " " HA " "    " 1 0 0 0 FFFFFF  H563  0 <> 1 0 0 0 0 0 0 <> <> 0 566 <> 0 0 1 <> <> <> <> <>
  567 41 10.730774 48.837766 9.680787 66 W A 21 0.06000 0.06000 "TRP " "1HB " "    " 1 0 0 0 FFFFFF  H564  0 <> 1 0 0 0 0 0 0 <> <> 0 567 <> 0 0 1 <> <> <> <> <>
  568 41 11.757757 48.972362 8.301807 66 W A 21 0.06000 0.06000 "TRP " "2HB " "    " 1 0 0 0 FFFFFF  H565  0 <> 1 0 0 0 0 0 0 <> <> 0 568 <> 0 0 1 <> <> <> <> <>
  569 41 14.661607 48.187322 7.994482 66 W A 21 0.11500 0.11500 "TRP " " HE3" "    " 1 0 0 0 FFFFFF  H566  0 <> 1 0 0 0 0 0 0 <> <> 0 569 <> 0 0 1 <> <> <> <> <>
  570 41 10.641373 46.608926 10.769776 66 W A 21 0.11500 0.11500 "TRP " " HD1" "    " 1 0 0 0 FFFFFF  H567  0 <> 1 0 0 0 0 0 0 <> <> 0 570 <> 0 0 1 <> <> <> <> <>
  571 43 12.008171 44.447625 10.762142 66 W A 21 0.42000 0.42000 "TRP " " HE1" "    " 1 0 0 0 FFFFFF  H568  0 <> 1 0 0 0 0 0 0 <> <> 0 571 <> 0 0 1 <> <> <> <> <>
  572 41 14.582284 43.536980 9.768272 66 W A 21 0.11500 0.11500 "TRP " " HZ2" "    " 1 0 0 0 FFFFFF  H569  0 <> 1 0 0 0 0 0 0 <> <> 0 572 <> 0 0 1 <> <> <> <> <>
  573 41 16.541899 46.661503 7.555194 66 W A 21 0.11500 0.11500 "TRP " " HZ3" "    " 1 0 0 0 FFFFFF  H570  0 <> 1 0 0 0 0 0 0 <> <> 0 573 <> 0 0 1 <> <> <> <> <>
  574 41 16.522272 44.336662 8.439960 66 W A 21 0.11500 0.11500 "TRP " " HH2" "    " 1 0 0 0 FFFFFF  H571  0 <> 1 0 0 0 0 0 0 <> <> 0 574 <> 0 0 1 <> <> <> <> <>
  575 25 11.565887 49.493196 12.291458 67 N A 43 -0.50000 -0.50000 "ASN " " N  " "    " 7 0 0 0 5757FF  N572  0 <> 1 0 0 0 0 0 0 <> <> 0 575 <> 0 0 1 <> <> <> <> <>
  576 3 11.483185 48.967543 13.656458 67 N A 2 0.14000 0.14000 "ASN " " CA " "    " 6 0 0 0 A0A0A0  C573  0 <> 1 0 0 0 0 0 0 <> <> 0 576 <> 0 0 1 <> <> <> <> <>
  577 2 11.929806 47.491767 13.668960 67 N A 2 0.50000 0.50000 "ASN " " C  " "    " 6 0 0 0 A0A0A0  C574  0 <> 1 0 0 0 0 0 0 <> <> 0 577 <> 0 0 1 <> <> <> <> <>
  578 15 11.093746 46.586250 13.649088 67 N A 70 -0.50000 -0.50000 "ASN " " O  " "    " 8 0 0 0 FF2F2F  O575  0 <> 1 0 0 0 0 0 0 <> <> 0 578 <> 0 0 1 <> <> <> <> <>
  579 3 10.025283 49.015806 14.195721 67 N A 2 -0.12000 -0.12000 "ASN " " CB " "    " 6 0 0 0 A0A0A0  C576  0 <> 1 0 0 0 0 0 0 <> <> 0 579 <> 0 0 1 <> <> <> <> <>
  580 2 9.407717 50.397021 14.373884 67 N A 2 0.50000 0.50000 "ASN " " CG " "    " 6 0 0 0 A0A0A0  C577  0 <> 1 0 0 0 0 0 0 <> <> 0 580 <> 0 0 1 <> <> <> <> <>
  581 15 10.010973 51.302138 14.941502 67 N A 70 -0.50000 -0.50000 "ASN " " OD1" "    " 8 0 0 0 FF2F2F  O578  0 <> 1 0 0 0 0 0 0 <> <> 0 581 <> 0 0 1 <> <> <> <> <>
  582 25 8.185935 50.582923 13.886047 67 N A 43 -0.76000 -0.76000 "ASN " " ND2" "    " 7 0 0 0 5757FF  N579  0 <> 1 0 0 0 0 0 0 <> <> 0 582 <> 0 0 1 <> <> <> <> <>
  583 43 10.698470 49.649592 11.794537 67 N A 21 0.30000 0.30000 "ASN " " H  " "    " 1 0 0 0 FFFFFF  H580  0 <> 1 0 0 0 0 0 0 <> <> 0 583 <> 0 0 1 <> <> <> <> <>
  584 41 12.136737 49.545836 14.311661 67 N A 21 0.06000 0.06000 "ASN " " HA " "    " 1 0 0 0 FFFFFF  H581  0 <> 1 0 0 0 0 0 0 <> <> 0 584 <> 0 0 1 <> <> <> <> <>
  585 41 9.374809 48.424778 13.548214 67 N A 21 0.06000 0.06000 "ASN " "1HB " "    " 1 0 0 0 FFFFFF  H582  0 <> 1 0 0 0 0 0 0 <> <> 0 585 <> 0 0 1 <> <> <> <> <>
  586 41 9.988389 48.533561 15.173821 67 N A 21 0.06000 0.06000 "ASN " "2HB " "    " 1 0 0 0 FFFFFF  H583  0 <> 1 0 0 0 0 0 0 <> <> 0 586 <> 0 0 1 <> <> <> <> <>
  587 43 7.767010 51.495827 13.939844 67 N A 21 0.38000 0.38000 "ASN " "1HD2" "    " 1 0 0 0 FFFFFF  H584  0 <> 1 0 0 0 0 0 0 <> <> 0 587 <> 0 0 1 <> <> <> <> <>
  588 43 7.739766 49.856634 13.346652 67 N A 21 0.38000 0.38000 "ASN " "2HD2" "    " 1 0 0 0 FFFFFF  H585  0 <> 1 0 0 0 0 0 0 <> <> 0 588 <> 0 0 1 <> <> <> <> <>
  589 25 13.244621 47.244040 13.702677 68 I A 43 -0.50000 -0.50000 "ILE " " N  " "    " 7 0 0 0 5757FF  N586  0 <> 1 0 0 0 0 0 0 <> <> 0 589 <> 0 0 1 <> <> <> <> <>
  590 3 13.842376 45.907911 13.790296 68 I A 2 0.14000 0.14000 "ILE " " CA " "    " 6 0 0 0 A0A0A0  C587  0 <> 1 0 0 0 0 0 0 <> <> 0 590 <> 0 0 1 <> <> <> <> <>
  591 2 13.422508 45.238149 15.120502 68 I A 2 0.50000 0.50000 "ILE " " C  " "    " 6 0 0 0 A0A0A0  C588  0 <> 1 0 0 0 0 0 0 <> <> 0 591 <> 0 0 1 <> <> <> <> <>
  592 15 13.206284 45.928363 16.122804 68 I A 70 -0.50000 -0.50000 "ILE " " O  " "    " 8 0 0 0 FF2F2F  O589  0 <> 1 0 0 0 0 0 0 <> <> 0 592 <> 0 0 1 <> <> <> <> <>
  593 3 15.404853 45.958725 13.703967 68 I A 2 -0.06000 -0.06000 "ILE " " CB " "    " 6 0 0 0 A0A0A0  C590  0 <> 1 0 0 0 0 0 0 <> <> 0 593 <> 0 0 1 <> <> <> <> <>
  594 3 15.928977 44.652235 13.067634 68 I A 2 -0.18000 -0.18000 "ILE " " CG2" "    " 6 0 0 0 A0A0A0  C591  0 <> 1 0 0 0 0 0 0 <> <> 0 594 <> 0 0 1 <> <> <> <> <>
  595 3 16.004352 47.194625 12.984490 68 I A 2 -0.12000 -0.12000 "ILE " " CG1" "    " 6 0 0 0 A0A0A0  C592  0 <> 1 0 0 0 0 0 0 <> <> 0 595 <> 0 0 1 <> <> <> <> <>
  596 3 17.524872 47.329356 13.177705 68 I A 2 -0.18000 -0.18000 "ILE " " CD1" "    " 6 0 0 0 A0A0A0  C593  0 <> 1 0 0 0 0 0 0 <> <> 0 596 <> 0 0 1 <> <> <> <> <>
  597 43 13.864050 48.029547 13.558741 68 I A 21 0.30000 0.30000 "ILE " " H  " "    " 1 0 0 0 FFFFFF  H594  0 <> 1 0 0 0 0 0 0 <> <> 0 597 <> 0 0 1 <> <> <> <> <>
  598 41 13.443804 45.330540 12.954046 68 I A 21 0.06000 0.06000 "ILE " " HA " "    " 1 0 0 0 FFFFFF  H595  0 <> 1 0 0 0 0 0 0 <> <> 0 598 <> 0 0 1 <> <> <> <> <>
  599 41 15.798716 45.998168 14.720596 68 I A 21 0.06000 0.06000 "ILE " " HB " "    " 1 0 0 0 FFFFFF  H596  0 <> 1 0 0 0 0 0 0 <> <> 0 599 <> 0 0 1 <> <> <> <> <>
  600 41 17.014270 44.622370 13.004921 68 I A 21 0.06000 0.06000 "ILE " "1HG2" "    " 1 0 0 0 FFFFFF  H597  0 <> 1 0 0 0 0 0 0 <> <> 0 600 <> 0 0 1 <> <> <> <> <>
  601 41 15.634001 43.770341 13.634884 68 I A 21 0.06000 0.06000 "ILE " "2HG2" "    " 1 0 0 0 FFFFFF  H598  0 <> 1 0 0 0 0 0 0 <> <> 0 601 <> 0 0 1 <> <> <> <> <>
  602 41 15.557205 44.533466 12.050421 68 I A 21 0.06000 0.06000 "ILE " "3HG2" "    " 1 0 0 0 FFFFFF  H599  0 <> 1 0 0 0 0 0 0 <> <> 0 602 <> 0 0 1 <> <> <> <> <>
  603 41 15.754103 47.172543 11.922000 68 I A 21 0.06000 0.06000 "ILE " "1HG1" "    " 1 0 0 0 FFFFFF  H600  0 <> 1 0 0 0 0 0 0 <> <> 0 603 <> 0 0 1 <> <> <> <> <>
  604 41 15.577251 48.114054 13.381261 68 I A 21 0.06000 0.06000 "ILE " "2HG1" "    " 1 0 0 0 FFFFFF  H601  0 <> 1 0 0 0 0 0 0 <> <> 0 604 <> 0 0 1 <> <> <> <> <>
  605 41 17.895064 48.272748 12.782323 68 I A 21 0.06000 0.06000 "ILE " "1HD1" "    " 1 0 0 0 FFFFFF  H602  0 <> 1 0 0 0 0 0 0 <> <> 0 605 <> 0 0 1 <> <> <> <> <>
  606 41 17.803713 47.301258 14.228430 68 I A 21 0.06000 0.06000 "ILE " "2HD1" "    " 1 0 0 0 FFFFFF  H603  0 <> 1 0 0 0 0 0 0 <> <> 0 606 <> 0 0 1 <> <> <> <> <>
  607 41 18.073180 46.533064 12.677719 68 I A 21 0.06000 0.06000 "ILE " "3HD1" "    " 1 0 0 0 FFFFFF  H604  0 <> 1 0 0 0 0 0 0 <> <> 0 607 <> 0 0 1 <> <> <> <> <>
  608 25 13.343200 43.903799 15.164688 69 K A 43 -0.50000 -0.50000 "LYS " " N  " "    " 7 0 0 0 5757FF  N605  0 <> 1 0 0 0 0 0 0 <> <> 0 608 <> 0 0 1 <> <> <> <> <>
  609 3 13.123136 43.146763 16.387872 69 K A 2 0.14000 0.14000 "LYS " " CA " "    " 6 0 0 0 A0A0A0  C606  0 <> 1 0 0 0 0 0 0 <> <> 0 609 <> 0 0 1 <> <> <> <> <>
  610 2 13.766965 41.762682 16.269601 69 K A 2 0.50000 0.50000 "LYS " " C  " "    " 6 0 0 0 A0A0A0  C607  0 <> 1 0 0 0 0 0 0 <> <> 0 610 <> 0 0 1 <> <> <> <> <>
  611 15 13.452763 41.009545 15.355838 69 K A 70 -0.50000 -0.50000 "LYS " " O  " "    " 8 0 0 0 FF2F2F  O608  0 <> 1 0 0 0 0 0 0 <> <> 0 611 <> 0 0 1 <> <> <> <> <>
  612 3 11.625242 43.132110 16.792112 69 K A 2 -0.12000 -0.12000 "LYS " " CB " "    " 6 0 0 0 A0A0A0  C609  0 <> 1 0 0 0 0 0 0 <> <> 0 612 <> 0 0 1 <> <> <> <> <>
  613 3 11.358152 43.625572 18.231012 69 K A 2 -0.12000 -0.12000 "LYS " " CG " "    " 6 0 0 0 A0A0A0  C610  0 <> 1 0 0 0 0 0 0 <> <> 0 613 <> 0 0 1 <> <> <> <> <>
  614 3 11.886942 42.706098 19.348204 69 K A 2 -0.12000 -0.12000 "LYS " " CD " "    " 6 0 0 0 A0A0A0  C611  0 <> 1 0 0 0 0 0 0 <> <> 0 614 <> 0 0 1 <> <> <> <> <>
  615 3 11.035538 41.441823 19.556507 69 K A 2 0.19000 0.19000 "LYS " " CE " "    " 6 0 0 0 A0A0A0  C612  0 <> 1 0 0 0 0 0 0 <> <> 0 615 <> 0 0 1 <> <> <> <> <>
  616 32 11.669918 40.525610 20.515144 69 K A 43 -0.30000 -0.30000 "LYS " " NZ " "    " 7 1 0 0 5757FF  N613  0 <> 1 0 0 0 0 0 0 <> <> 0 616 <> 0 0 1 <> <> <> <> <>
  617 43 13.535972 43.361858 14.331705 69 K A 21 0.30000 0.30000 "LYS " " H  " "    " 1 0 0 0 FFFFFF  H614  0 <> 1 0 0 0 0 0 0 <> <> 0 617 <> 0 0 1 <> <> <> <> <>
  618 41 13.677672 43.672099 17.168561 69 K A 21 0.06000 0.06000 "LYS " " HA " "    " 1 0 0 0 FFFFFF  H615  0 <> 1 0 0 0 0 0 0 <> <> 0 618 <> 0 0 1 <> <> <> <> <>
  619 41 11.061997 43.776409 16.114272 69 K A 21 0.06000 0.06000 "LYS " "1HB " "    " 1 0 0 0 FFFFFF  H616  0 <> 1 0 0 0 0 0 0 <> <> 0 619 <> 0 0 1 <> <> <> <> <>
  620 41 11.197969 42.140282 16.637646 69 K A 21 0.06000 0.06000 "LYS " "2HB " "    " 1 0 0 0 FFFFFF  H617  0 <> 1 0 0 0 0 0 0 <> <> 0 620 <> 0 0 1 <> <> <> <> <>
  621 41 11.805854 44.614706 18.338579 69 K A 21 0.06000 0.06000 "LYS " "1HG " "    " 1 0 0 0 FFFFFF  H618  0 <> 1 0 0 0 0 0 0 <> <> 0 621 <> 0 0 1 <> <> <> <> <>
  622 41 10.286229 43.778921 18.363724 69 K A 21 0.06000 0.06000 "LYS " "2HG " "    " 1 0 0 0 FFFFFF  H619  0 <> 1 0 0 0 0 0 0 <> <> 0 622 <> 0 0 1 <> <> <> <> <>
  623 41 12.924678 42.437893 19.151759 69 K A 21 0.06000 0.06000 "LYS " "1HD " "    " 1 0 0 0 FFFFFF  H620  0 <> 1 0 0 0 0 0 0 <> <> 0 623 <> 0 0 1 <> <> <> <> <>
  624 41 11.907011 43.271603 20.281696 69 K A 21 0.06000 0.06000 "LYS " "2HD " "    " 1 0 0 0 FFFFFF  H621  0 <> 1 0 0 0 0 0 0 <> <> 0 624 <> 0 0 1 <> <> <> <> <>
  625 41 10.041387 41.710787 19.915769 69 K A 21 0.06000 0.06000 "LYS " "1HE " "    " 1 0 0 0 FFFFFF  H622  0 <> 1 0 0 0 0 0 0 <> <> 0 625 <> 0 0 1 <> <> <> <> <>
  626 41 10.905053 40.905223 18.615451 69 K A 21 0.06000 0.06000 "LYS " "2HE " "    " 1 0 0 0 FFFFFF  H623  0 <> 1 0 0 0 0 0 0 <> <> 0 626 <> 0 0 1 <> <> <> <> <>
  627 44 11.074374 39.741032 20.720126 69 K A 21 0.33000 0.33000 "LYS " "1HZ " "    " 1 0 0 0 FFFFFF  H624  0 <> 1 0 0 0 0 0 0 <> <> 0 627 <> 0 0 1 <> <> <> <> <>
  628 44 12.520579 40.168984 20.066997 69 K A 21 0.33000 0.33000 "LYS " "2HZ " "    " 1 0 0 0 FFFFFF  H625  0 <> 1 0 0 0 0 0 0 <> <> 0 628 <> 0 0 1 <> <> <> <> <>
  629 44 11.917678 41.012893 21.387259 69 K A 21 0.33000 0.33000 "LYS " "3HZ " "    " 1 0 0 0 FFFFFF  H626  0 <> 1 0 0 0 0 0 0 <> <> 0 629 <> 0 0 1 <> <> <> <> <>
  630 25 14.638879 41.447072 17.225060 70 Y A 43 -0.50000 -0.50000 "TYR " " N  " "    " 7 0 0 0 5757FF  N627  0 <> 1 0 0 0 0 0 0 <> <> 0 630 <> 0 0 1 <> <> <> <> <>
  631 3 15.348257 40.188558 17.429015 70 Y A 2 0.14000 0.14000 "TYR " " CA " "    " 6 0 0 0 A0A0A0  C628  0 <> 1 0 0 0 0 0 0 <> <> 0 631 <> 0 0 1 <> <> <> <> <>
  632 2 14.462132 39.194499 18.187520 70 Y A 2 0.50000 0.50000 "TYR " " C  " "    " 6 0 0 0 A0A0A0  C629  0 <> 1 0 0 0 0 0 0 <> <> 0 632 <> 0 0 1 <> <> <> <> <>
  633 15 13.550311 39.596065 18.923308 70 Y A 70 -0.50000 -0.50000 "TYR " " O  " "    " 8 0 0 0 FF2F2F  O630  0 <> 1 0 0 0 0 0 0 <> <> 0 633 <> 0 0 1 <> <> <> <> <>
  634 3 16.559923 40.504282 18.354024 70 Y A 2 -0.00500 -0.00500 "TYR " " CB " "    " 6 0 0 0 A0A0A0  C631  0 <> 1 0 0 0 0 0 0 <> <> 0 634 <> 0 0 1 <> <> <> <> <>
  635 2 16.203785 41.287476 19.622863 70 Y A 2 -0.11500 -0.11500 "TYR " " CG " "    " 6 0 0 0 A0A0A0  C632  0 <> 1 0 0 0 0 0 0 <> <> 0 635 <> 0 0 1 <> <> <> <> <>
  636 2 15.919655 40.638369 20.841790 70 Y A 2 -0.11500 -0.11500 "TYR " " CD1" "    " 6 0 0 0 A0A0A0  C633  0 <> 1 0 0 0 0 0 0 <> <> 0 636 <> 0 0 1 <> <> <> <> <>
  637 2 15.379468 41.356354 21.927412 70 Y A 2 -0.11500 -0.11500 "TYR " " CE1" "    " 6 0 0 0 A0A0A0  C634  0 <> 1 0 0 0 0 0 0 <> <> 0 637 <> 0 0 1 <> <> <> <> <>
  638 2 16.069481 42.683750 19.550867 70 Y A 2 -0.11500 -0.11500 "TYR " " CD2" "    " 6 0 0 0 A0A0A0  C635  0 <> 1 0 0 0 0 0 0 <> <> 0 638 <> 0 0 1 <> <> <> <> <>
  639 2 15.530449 43.403101 20.630296 70 Y A 2 -0.11500 -0.11500 "TYR " " CE2" "    " 6 0 0 0 A0A0A0  C636  0 <> 1 0 0 0 0 0 0 <> <> 0 639 <> 0 0 1 <> <> <> <> <>
  640 2 15.142785 42.738273 21.802229 70 Y A 2 0.15000 0.15000 "TYR " " CZ " "    " 6 0 0 0 A0A0A0  C637  0 <> 1 0 0 0 0 0 0 <> <> 0 640 <> 0 0 1 <> <> <> <> <>
  641 16 14.501521 43.428289 22.789436 70 Y A 70 -0.58500 -0.58500 "TYR " " OH " "    " 8 0 0 0 FF2F2F  O638  0 <> 1 0 0 0 0 0 0 <> <> 0 641 <> 0 0 1 <> <> <> <> <>
  642 43 14.830728 42.134341 17.934146 70 Y A 21 0.30000 0.30000 "TYR " " H  " "    " 1 0 0 0 FFFFFF  H639  0 <> 1 0 0 0 0 0 0 <> <> 0 642 <> 0 0 1 <> <> <> <> <>
  643 41 15.657630 39.758110 16.477121 70 Y A 21 0.06000 0.06000 "TYR " " HA " "    " 1 0 0 0 FFFFFF  H640  0 <> 1 0 0 0 0 0 0 <> <> 0 643 <> 0 0 1 <> <> <> <> <>
  644 41 17.087576 39.586176 18.620251 70 Y A 21 0.06000 0.06000 "TYR " "1HB " "    " 1 0 0 0 FFFFFF  H641  0 <> 1 0 0 0 0 0 0 <> <> 0 644 <> 0 0 1 <> <> <> <> <>
  645 41 17.284370 41.074261 17.777224 70 Y A 21 0.06000 0.06000 "TYR " "2HB " "    " 1 0 0 0 FFFFFF  H642  0 <> 1 0 0 0 0 0 0 <> <> 0 645 <> 0 0 1 <> <> <> <> <>
  646 41 16.070009 39.579023 20.925922 70 Y A 21 0.11500 0.11500 "TYR " " HD1" "    " 1 0 0 0 FFFFFF  H643  0 <> 1 0 0 0 0 0 0 <> <> 0 646 <> 0 0 1 <> <> <> <> <>
  647 41 15.118394 40.840482 22.839985 70 Y A 21 0.11500 0.11500 "TYR " " HE1" "    " 1 0 0 0 FFFFFF  H644  0 <> 1 0 0 0 0 0 0 <> <> 0 647 <> 0 0 1 <> <> <> <> <>
  648 41 16.345142 43.185235 18.637075 70 Y A 21 0.11500 0.11500 "TYR " " HD2" "    " 1 0 0 0 FFFFFF  H645  0 <> 1 0 0 0 0 0 0 <> <> 0 648 <> 0 0 1 <> <> <> <> <>
  649 41 15.400089 44.468884 20.556510 70 Y A 21 0.11500 0.11500 "TYR " " HE2" "    " 1 0 0 0 FFFFFF  H646  0 <> 1 0 0 0 0 0 0 <> <> 0 649 <> 0 0 1 <> <> <> <> <>
  650 42 14.481562 44.390892 22.621583 70 Y A 21 0.43500 0.43500 "TYR " " HH " "    " 1 0 0 0 FFFFFF  H647  0 <> 1 0 0 0 0 0 0 <> <> 0 650 <> 0 0 1 <> <> <> <> <>
  651 25 14.811192 37.909373 18.129677 71 D A 43 -0.50000 -0.50000 "ASP " " N  " "    " 7 0 0 0 5757FF  N648  0 <> 1 0 0 0 0 0 0 <> <> 0 651 <> 0 0 1 <> <> <> <> <>
  652 3 14.492069 36.958287 19.196688 71 D A 2 0.14000 0.14000 "ASP " " CA " "    " 6 0 0 0 A0A0A0  C649  0 <> 1 0 0 0 0 0 0 <> <> 0 652 <> 0 0 1 <> <> <> <> <>
  653 2 15.687609 37.022887 20.181084 71 D A 2 0.50000 0.50000 "ASP " " C  " "    " 6 0 0 0 A0A0A0  C650  0 <> 1 0 0 0 0 0 0 <> <> 0 653 <> 0 0 1 <> <> <> <> <>
  654 15 16.836055 36.998948 19.729654 71 D A 70 -0.50000 -0.50000 "ASP " " O  " "    " 8 0 0 0 FF2F2F  O651  0 <> 1 0 0 0 0 0 0 <> <> 0 654 <> 0 0 1 <> <> <> <> <>
  655 3 14.315797 35.532807 18.608953 71 D A 2 -0.22000 -0.22000 "ASP " " CB " "    " 6 0 0 0 A0A0A0  C652  0 <> 1 0 0 0 0 0 0 <> <> 0 655 <> 0 0 1 <> <> <> <> <>
  656 2 14.538453 34.400085 19.611559 71 D A 2 0.70000 0.70000 "ASP " " CG " "    " 6 0 0 0 A0A0A0  C653  0 <> 1 0 0 0 0 0 0 <> <> 0 656 <> 0 0 1 <> <> <> <> <>
  657 18 14.142203 34.565032 20.784666 71 D A 70 -0.80000 -0.80000 "ASP " " OD1" "    " 8 -1 0 0 FF2F2F  O654  0 <> 1 0 0 0 0 0 0 <> <> 0 657 <> 0 0 1 <> <> <> <> <>
  658 15 15.260187 33.456292 19.252770 71 D A 70 -0.80000 -0.80000 "ASP " " OD2" "    " 8 0 0 0 FF2F2F  O655  0 <> 1 0 0 0 0 0 0 <> <> 0 658 <> 0 0 1 <> <> <> <> <>
  659 43 15.615171 37.674092 17.555656 71 D A 21 0.30000 0.30000 "ASP " " H  " "    " 1 0 0 0 FFFFFF  H656  0 <> 1 0 0 0 0 0 0 <> <> 0 659 <> 0 0 1 <> <> <> <> <>
  660 41 13.561904 37.221168 19.696835 71 D A 21 0.06000 0.06000 "ASP " " HA " "    " 1 0 0 0 FFFFFF  H657  0 <> 1 0 0 0 0 0 0 <> <> 0 660 <> 0 0 1 <> <> <> <> <>
  661 41 13.320826 35.418733 18.180989 71 D A 21 0.06000 0.06000 "ASP " "1HB " "    " 1 0 0 0 FFFFFF  H658  0 <> 1 0 0 0 0 0 0 <> <> 0 661 <> 0 0 1 <> <> <> <> <>
  662 41 15.019072 35.380120 17.789509 71 D A 21 0.06000 0.06000 "ASP " "2HB " "    " 1 0 0 0 FFFFFF  H659  0 <> 1 0 0 0 0 0 0 <> <> 0 662 <> 0 0 1 <> <> <> <> <>
  663 25 15.474400 37.142458 21.511313 72 P A 43 -0.14000 -0.14000 "PRO " " N  " "    " 7 0 0 0 5757FF  N660  0 <> 1 0 0 0 0 0 0 <> <> 0 663 <> 0 0 1 <> <> <> <> <>
  664 3 16.583050 37.125733 22.466714 72 P A 2 0.01000 0.01000 "PRO " " CA " "    " 6 0 0 0 A0A0A0  C661  0 <> 1 0 0 0 0 0 0 <> <> 0 664 <> 0 0 1 <> <> <> <> <>
  665 2 17.231941 35.740873 22.654878 72 P A 2 0.50000 0.50000 "PRO " " C  " "    " 6 0 0 0 A0A0A0  C662  0 <> 1 0 0 0 0 0 0 <> <> 0 665 <> 0 0 1 <> <> <> <> <>
  666 15 18.377325 35.719382 23.118247 72 P A 70 -0.50000 -0.50000 "PRO " " O  " "    " 8 0 0 0 FF2F2F  O663  0 <> 1 0 0 0 0 0 0 <> <> 0 666 <> 0 0 1 <> <> <> <> <>
  667 3 14.192239 37.354669 22.190058 72 P A 2 -0.05000 -0.05000 "PRO " " CD " "    " 6 0 0 0 A0A0A0  C664  0 <> 1 0 0 0 0 0 0 <> <> 0 667 <> 0 0 1 <> <> <> <> <>
  668 3 15.986332 37.661793 23.777147 72 P A 2 -0.12000 -0.12000 "PRO " " CB " "    " 6 0 0 0 A0A0A0  C665  0 <> 1 0 0 0 0 0 0 <> <> 0 668 <> 0 0 1 <> <> <> <> <>
  669 3 14.504305 37.329567 23.687875 72 P A 2 -0.12000 -0.12000 "PRO " " CG " "    " 6 0 0 0 A0A0A0  C666  0 <> 1 0 0 0 0 0 0 <> <> 0 669 <> 0 0 1 <> <> <> <> <>
  670 41 13.801214 38.329756 21.899594 72 P A 21 0.06000 0.06000 "PRO " "1HD " "    " 1 0 0 0 FFFFFF  H667  0 <> 1 0 0 0 0 0 0 <> <> 0 670 <> 0 0 1 <> <> <> <> <>
  671 41 13.443372 36.603485 21.938719 72 P A 21 0.06000 0.06000 "PRO " "2HD " "    " 1 0 0 0 FFFFFF  H668  0 <> 1 0 0 0 0 0 0 <> <> 0 671 <> 0 0 1 <> <> <> <> <>
  672 41 17.363496 37.808133 22.127459 72 P A 21 0.06000 0.06000 "PRO " " HA " "    " 1 0 0 0 FFFFFF  H669  0 <> 1 0 0 0 0 0 0 <> <> 0 672 <> 0 0 1 <> <> <> <> <>
  673 41 16.449317 37.243247 24.672929 72 P A 21 0.06000 0.06000 "PRO " "1HB " "    " 1 0 0 0 FFFFFF  H670  0 <> 1 0 0 0 0 0 0 <> <> 0 673 <> 0 0 1 <> <> <> <> <>
  674 41 16.116296 38.743485 23.821527 72 P A 21 0.06000 0.06000 "PRO " "2HB " "    " 1 0 0 0 FFFFFF  H671  0 <> 1 0 0 0 0 0 0 <> <> 0 674 <> 0 0 1 <> <> <> <> <>
  675 41 13.875932 38.005509 24.268578 72 P A 21 0.06000 0.06000 "PRO " "1HG " "    " 1 0 0 0 FFFFFF  H672  0 <> 1 0 0 0 0 0 0 <> <> 0 675 <> 0 0 1 <> <> <> <> <>
  676 41 14.339789 36.318983 24.067835 72 P A 21 0.06000 0.06000 "PRO " "2HG " "    " 1 0 0 0 FFFFFF  H673  0 <> 1 0 0 0 0 0 0 <> <> 0 676 <> 0 0 1 <> <> <> <> <>
  677 25 16.550661 34.634991 22.305979 73 L A 43 -0.50000 -0.50000 "LEU " " N  " "    " 7 0 0 0 5757FF  N674  0 <> 1 0 0 0 0 0 0 <> <> 0 677 <> 0 0 1 <> <> <> <> <>
  678 3 17.016594 33.256444 22.474887 73 L A 2 0.14000 0.14000 "LEU " " CA " "    " 6 0 0 0 A0A0A0  C675  0 <> 1 0 0 0 0 0 0 <> <> 0 678 <> 0 0 1 <> <> <> <> <>
  679 2 17.903704 32.800712 21.300829 73 L A 2 0.50000 0.50000 "LEU " " C  " "    " 6 0 0 0 A0A0A0  C676  0 <> 1 0 0 0 0 0 0 <> <> 0 679 <> 0 0 1 <> <> <> <> <>
  680 15 18.763729 31.942553 21.497769 73 L A 70 -0.50000 -0.50000 "LEU " " O  " "    " 8 0 0 0 FF2F2F  O677  0 <> 1 0 0 0 0 0 0 <> <> 0 680 <> 0 0 1 <> <> <> <> <>
  681 3 15.807182 32.298934 22.568918 73 L A 2 -0.12000 -0.12000 "LEU " " CB " "    " 6 0 0 0 A0A0A0  C678  0 <> 1 0 0 0 0 0 0 <> <> 0 681 <> 0 0 1 <> <> <> <> <>
  682 3 14.784228 32.633208 23.679067 73 L A 2 -0.06000 -0.06000 "LEU " " CG " "    " 6 0 0 0 A0A0A0  C679  0 <> 1 0 0 0 0 0 0 <> <> 0 682 <> 0 0 1 <> <> <> <> <>
  683 3 13.568658 31.699811 23.585690 73 L A 2 -0.18000 -0.18000 "LEU " " CD1" "    " 6 0 0 0 A0A0A0  C680  0 <> 1 0 0 0 0 0 0 <> <> 0 683 <> 0 0 1 <> <> <> <> <>
  684 3 15.399216 32.581942 25.088059 73 L A 2 -0.18000 -0.18000 "LEU " " CD2" "    " 6 0 0 0 A0A0A0  C681  0 <> 1 0 0 0 0 0 0 <> <> 0 684 <> 0 0 1 <> <> <> <> <>
  685 43 15.636429 34.713811 21.841095 73 L A 21 0.30000 0.30000 "LEU " " H  " "    " 1 0 0 0 FFFFFF  H682  0 <> 1 0 0 0 0 0 0 <> <> 0 685 <> 0 0 1 <> <> <> <> <>
  686 41 17.609994 33.185649 23.386665 73 L A 21 0.06000 0.06000 "LEU " " HA " "    " 1 0 0 0 FFFFFF  H683  0 <> 1 0 0 0 0 0 0 <> <> 0 686 <> 0 0 1 <> <> <> <> <>
  687 41 15.286572 32.284137 21.609554 73 L A 21 0.06000 0.06000 "LEU " "1HB " "    " 1 0 0 0 FFFFFF  H684  0 <> 1 0 0 0 0 0 0 <> <> 0 687 <> 0 0 1 <> <> <> <> <>
  688 41 16.168559 31.279328 22.711541 73 L A 21 0.06000 0.06000 "LEU " "2HB " "    " 1 0 0 0 FFFFFF  H685  0 <> 1 0 0 0 0 0 0 <> <> 0 688 <> 0 0 1 <> <> <> <> <>
  689 41 14.411246 33.644293 23.507687 73 L A 21 0.06000 0.06000 "LEU " " HG " "    " 1 0 0 0 FFFFFF  H686  0 <> 1 0 0 0 0 0 0 <> <> 0 689 <> 0 0 1 <> <> <> <> <>
  690 41 12.813847 31.954019 24.329915 73 L A 21 0.06000 0.06000 "LEU " "1HD1" "    " 1 0 0 0 FFFFFF  H687  0 <> 1 0 0 0 0 0 0 <> <> 0 690 <> 0 0 1 <> <> <> <> <>
  691 41 13.096568 31.778844 22.604756 73 L A 21 0.06000 0.06000 "LEU " "2HD1" "    " 1 0 0 0 FFFFFF  H688  0 <> 1 0 0 0 0 0 0 <> <> 0 691 <> 0 0 1 <> <> <> <> <>
  692 41 13.850686 30.657208 23.734680 73 L A 21 0.06000 0.06000 "LEU " "3HD1" "    " 1 0 0 0 FFFFFF  H689  0 <> 1 0 0 0 0 0 0 <> <> 0 692 <> 0 0 1 <> <> <> <> <>
  693 41 14.645252 32.781278 25.850070 73 L A 21 0.06000 0.06000 "LEU " "1HD2" "    " 1 0 0 0 FFFFFF  H690  0 <> 1 0 0 0 0 0 0 <> <> 0 693 <> 0 0 1 <> <> <> <> <>
  694 41 15.830754 31.602691 25.297386 73 L A 21 0.06000 0.06000 "LEU " "2HD2" "    " 1 0 0 0 FFFFFF  H691  0 <> 1 0 0 0 0 0 0 <> <> 0 694 <> 0 0 1 <> <> <> <> <>
  695 41 16.182116 33.329818 25.211604 73 L A 21 0.06000 0.06000 "LEU " "3HD2" "    " 1 0 0 0 FFFFFF  H692  0 <> 1 0 0 0 0 0 0 <> <> 0 695 <> 0 0 1 <> <> <> <> <>
  696 25 17.790624 33.425643 20.120385 74 K A 43 -0.50000 -0.50000 "LYS " " N  " "    " 7 0 0 0 5757FF  N693  0 <> 1 0 0 0 0 0 0 <> <> 0 696 <> 0 0 1 <> <> <> <> <>
  697 3 18.704502 33.341426 18.975437 74 K A 2 0.14000 0.14000 "LYS " " CA " "    " 6 0 0 0 A0A0A0  C694  0 <> 1 0 0 0 0 0 0 <> <> 0 697 <> 0 0 1 <> <> <> <> <>
  698 2 20.162864 33.571280 19.409329 74 K A 2 0.50000 0.50000 "LYS " " C  " "    " 6 0 0 0 A0A0A0  C695  0 <> 1 0 0 0 0 0 0 <> <> 0 698 <> 0 0 1 <> <> <> <> <>
  699 15 21.074115 32.873359 18.968114 74 K A 70 -0.50000 -0.50000 "LYS " " O  " "    " 8 0 0 0 FF2F2F  O696  0 <> 1 0 0 0 0 0 0 <> <> 0 699 <> 0 0 1 <> <> <> <> <>
  700 3 18.273104 34.384074 17.914301 74 K A 2 -0.12000 -0.12000 "LYS " " CB " "    " 6 0 0 0 A0A0A0  C697  0 <> 1 0 0 0 0 0 0 <> <> 0 700 <> 0 0 1 <> <> <> <> <>
  701 3 19.042779 34.339466 16.575685 74 K A 2 -0.12000 -0.12000 "LYS " " CG " "    " 6 0 0 0 A0A0A0  C698  0 <> 1 0 0 0 0 0 0 <> <> 0 701 <> 0 0 1 <> <> <> <> <>
  702 3 18.987083 35.681015 15.824643 74 K A 2 -0.12000 -0.12000 "LYS " " CD " "    " 6 0 0 0 A0A0A0  C699  0 <> 1 0 0 0 0 0 0 <> <> 0 702 <> 0 0 1 <> <> <> <> <>
  703 3 19.778987 35.666755 14.505528 74 K A 2 0.19000 0.19000 "LYS " " CE " "    " 6 0 0 0 A0A0A0  C700  0 <> 1 0 0 0 0 0 0 <> <> 0 703 <> 0 0 1 <> <> <> <> <>
  704 32 20.067580 37.023741 14.021281 74 K A 43 -0.30000 -0.30000 "LYS " " NZ " "    " 7 1 0 0 5757FF  N701  0 <> 1 0 0 0 0 0 0 <> <> 0 704 <> 0 0 1 <> <> <> <> <>
  705 43 16.833263 33.733827 19.902002 74 K A 21 0.30000 0.30000 "LYS " " H  " "    " 1 0 0 0 FFFFFF  H702  0 <> 1 0 0 0 0 0 0 <> <> 0 705 <> 0 0 1 <> <> <> <> <>
  706 41 18.616540 32.338629 18.554170 74 K A 21 0.06000 0.06000 "LYS " " HA " "    " 1 0 0 0 FFFFFF  H703  0 <> 1 0 0 0 0 0 0 <> <> 0 706 <> 0 0 1 <> <> <> <> <>
  707 41 17.209921 34.272803 17.699856 74 K A 21 0.06000 0.06000 "LYS " "1HB " "    " 1 0 0 0 FFFFFF  H704  0 <> 1 0 0 0 0 0 0 <> <> 0 707 <> 0 0 1 <> <> <> <> <>
  708 41 18.378124 35.378479 18.350153 74 K A 21 0.06000 0.06000 "LYS " "2HB " "    " 1 0 0 0 FFFFFF  H705  0 <> 1 0 0 0 0 0 0 <> <> 0 708 <> 0 0 1 <> <> <> <> <>
  709 41 20.091950 34.098247 16.744838 74 K A 21 0.06000 0.06000 "LYS " "1HG " "    " 1 0 0 0 FFFFFF  H706  0 <> 1 0 0 0 0 0 0 <> <> 0 709 <> 0 0 1 <> <> <> <> <>
  710 41 18.643999 33.535784 15.955129 74 K A 21 0.06000 0.06000 "LYS " "2HG " "    " 1 0 0 0 FFFFFF  H707  0 <> 1 0 0 0 0 0 0 <> <> 0 710 <> 0 0 1 <> <> <> <> <>
  711 41 17.951033 35.964892 15.628396 74 K A 21 0.06000 0.06000 "LYS " "1HD " "    " 1 0 0 0 FFFFFF  H708  0 <> 1 0 0 0 0 0 0 <> <> 0 711 <> 0 0 1 <> <> <> <> <>
  712 41 19.378186 36.459261 16.479320 74 K A 21 0.06000 0.06000 "LYS " "2HD " "    " 1 0 0 0 FFFFFF  H709  0 <> 1 0 0 0 0 0 0 <> <> 0 712 <> 0 0 1 <> <> <> <> <>
  713 41 20.731312 35.150502 14.631867 74 K A 21 0.06000 0.06000 "LYS " "1HE " "    " 1 0 0 0 FFFFFF  H710  0 <> 1 0 0 0 0 0 0 <> <> 0 713 <> 0 0 1 <> <> <> <> <>
  714 41 19.215358 35.126409 13.744153 74 K A 21 0.06000 0.06000 "LYS " "2HE " "    " 1 0 0 0 FFFFFF  H711  0 <> 1 0 0 0 0 0 0 <> <> 0 714 <> 0 0 1 <> <> <> <> <>
  715 44 20.373656 37.034926 13.065794 74 K A 21 0.33000 0.33000 "LYS " "1HZ " "    " 1 0 0 0 FFFFFF  H712  0 <> 1 0 0 0 0 0 0 <> <> 0 715 <> 0 0 1 <> <> <> <> <>
  716 44 19.202313 37.614391 14.067416 74 K A 21 0.33000 0.33000 "LYS " "2HZ " "    " 1 0 0 0 FFFFFF  H713  0 <> 1 0 0 0 0 0 0 <> <> 0 716 <> 0 0 1 <> <> <> <> <>
  717 44 20.779523 37.471215 14.593682 74 K A 21 0.33000 0.33000 "LYS " "3HZ " "    " 1 0 0 0 FFFFFF  H714  0 <> 1 0 0 0 0 0 0 <> <> 0 717 <> 0 0 1 <> <> <> <> <>
  718 25 20.353631 34.524535 20.325963 75 Y A 43 -0.50000 -0.50000 "TYR " " N  " "    " 7 0 0 0 5757FF  N715  0 <> 1 0 0 0 0 0 0 <> <> 0 718 <> 0 0 1 <> <> <> <> <>
  719 3 21.620498 34.895392 20.934432 75 Y A 2 0.14000 0.14000 "TYR " " CA " "    " 6 0 0 0 A0A0A0  C716  0 <> 1 0 0 0 0 0 0 <> <> 0 719 <> 0 0 1 <> <> <> <> <>
  720 2 21.515892 34.650175 22.451106 75 Y A 2 0.50000 0.50000 "TYR " " C  " "    " 6 0 0 0 A0A0A0  C717  0 <> 1 0 0 0 0 0 0 <> <> 0 720 <> 0 0 1 <> <> <> <> <>
  721 15 21.564095 35.593096 23.248873 75 Y A 70 -0.50000 -0.50000 "TYR " " O  " "    " 8 0 0 0 FF2F2F  O718  0 <> 1 0 0 0 0 0 0 <> <> 0 721 <> 0 0 1 <> <> <> <> <>
  722 3 21.931559 36.367283 20.590303 75 Y A 2 -0.00500 -0.00500 "TYR " " CB " "    " 6 0 0 0 A0A0A0  C719  0 <> 1 0 0 0 0 0 0 <> <> 0 722 <> 0 0 1 <> <> <> <> <>
  723 2 22.086155 36.700840 19.114688 75 Y A 2 -0.11500 -0.11500 "TYR " " CG " "    " 6 0 0 0 A0A0A0  C720  0 <> 1 0 0 0 0 0 0 <> <> 0 723 <> 0 0 1 <> <> <> <> <>
  724 2 21.291657 37.709779 18.525179 75 Y A 2 -0.11500 -0.11500 "TYR " " CD2" "    " 6 0 0 0 A0A0A0  C721  0 <> 1 0 0 0 0 0 0 <> <> 0 724 <> 0 0 1 <> <> <> <> <>
  725 2 21.456536 38.042017 17.166835 75 Y A 2 -0.11500 -0.11500 "TYR " " CE2" "    " 6 0 0 0 A0A0A0  C722  0 <> 1 0 0 0 0 0 0 <> <> 0 725 <> 0 0 1 <> <> <> <> <>
  726 2 23.030967 36.013129 18.324875 75 Y A 2 -0.11500 -0.11500 "TYR " " CD1" "    " 6 0 0 0 A0A0A0  C723  0 <> 1 0 0 0 0 0 0 <> <> 0 726 <> 0 0 1 <> <> <> <> <>
  727 2 23.177983 36.330644 16.960823 75 Y A 2 -0.11500 -0.11500 "TYR " " CE1" "    " 6 0 0 0 A0A0A0  C724  0 <> 1 0 0 0 0 0 0 <> <> 0 727 <> 0 0 1 <> <> <> <> <>
  728 2 22.406553 37.357387 16.385681 75 Y A 2 0.15000 0.15000 "TYR " " CZ " "    " 6 0 0 0 A0A0A0  C725  0 <> 1 0 0 0 0 0 0 <> <> 0 728 <> 0 0 1 <> <> <> <> <>
  729 16 22.557117 37.674094 15.067522 75 Y A 70 -0.58500 -0.58500 "TYR " " OH " "    " 8 0 0 0 FF2F2F  O726  0 <> 1 0 0 0 0 0 0 <> <> 0 729 <> 0 0 1 <> <> <> <> <>
  730 43 19.512352 34.974974 20.657901 75 Y A 21 0.30000 0.30000 "TYR " " H  " "    " 1 0 0 0 FFFFFF  H727  0 <> 1 0 0 0 0 0 0 <> <> 0 730 <> 0 0 1 <> <> <> <> <>
  731 41 22.415655 34.259853 20.550034 75 Y A 21 0.06000 0.06000 "TYR " " HA " "    " 1 0 0 0 FFFFFF  H728  0 <> 1 0 0 0 0 0 0 <> <> 0 731 <> 0 0 1 <> <> <> <> <>
  732 41 21.132559 36.987620 20.989793 75 Y A 21 0.06000 0.06000 "TYR " "1HB " "    " 1 0 0 0 FFFFFF  H729  0 <> 1 0 0 0 0 0 0 <> <> 0 732 <> 0 0 1 <> <> <> <> <>
  733 41 22.853168 36.669004 21.091305 75 Y A 21 0.06000 0.06000 "TYR " "2HB " "    " 1 0 0 0 FFFFFF  H730  0 <> 1 0 0 0 0 0 0 <> <> 0 733 <> 0 0 1 <> <> <> <> <>
  734 41 20.545180 38.241040 19.097273 75 Y A 21 0.11500 0.11500 "TYR " " HD2" "    " 1 0 0 0 FFFFFF  H731  0 <> 1 0 0 0 0 0 0 <> <> 0 734 <> 0 0 1 <> <> <> <> <>
  735 41 20.838968 38.817516 16.730009 75 Y A 21 0.11500 0.11500 "TYR " " HE2" "    " 1 0 0 0 FFFFFF  H732  0 <> 1 0 0 0 0 0 0 <> <> 0 735 <> 0 0 1 <> <> <> <> <>
  736 41 23.644188 35.234123 18.758048 75 Y A 21 0.11500 0.11500 "TYR " " HD1" "    " 1 0 0 0 FFFFFF  H733  0 <> 1 0 0 0 0 0 0 <> <> 0 736 <> 0 0 1 <> <> <> <> <>
  737 41 23.896009 35.788684 16.361678 75 Y A 21 0.11500 0.11500 "TYR " " HE1" "    " 1 0 0 0 FFFFFF  H734  0 <> 1 0 0 0 0 0 0 <> <> 0 737 <> 0 0 1 <> <> <> <> <>
  738 42 23.480680 37.736523 14.795480 75 Y A 21 0.43500 0.43500 "TYR " " HH " "    " 1 0 0 0 FFFFFF  H735  0 <> 1 0 0 0 0 0 0 <> <> 0 738 <> 0 0 1 <> <> <> <> <>
  739 25 21.293972 33.383929 22.829687 76 N A 43 -0.50000 -0.50000 "ASN " " N  " "    " 7 0 0 0 5757FF  N736  0 <> 1 0 0 0 0 0 0 <> <> 0 739 <> 0 0 1 <> <> <> <> <>
  740 3 21.152196 32.864742 24.199769 76 N A 2 0.14000 0.14000 "ASN " " CA " "    " 6 0 0 0 A0A0A0  C737  0 <> 1 0 0 0 0 0 0 <> <> 0 740 <> 0 0 1 <> <> <> <> <>
  741 2 22.512682 32.730721 24.922028 76 N A 2 0.50000 0.50000 "ASN " " C  " "    " 6 0 0 0 A0A0A0  C738  0 <> 1 0 0 0 0 0 0 <> <> 0 741 <> 0 0 1 <> <> <> <> <>
  742 15 23.544666 33.171410 24.421668 76 N A 70 -0.50000 -0.50000 "ASN " " O  " "    " 8 0 0 0 FF2F2F  O739  0 <> 1 0 0 0 0 0 0 <> <> 0 742 <> 0 0 1 <> <> <> <> <>
  743 3 20.454618 31.472069 24.167012 76 N A 2 -0.12000 -0.12000 "ASN " " CB " "    " 6 0 0 0 A0A0A0  C740  0 <> 1 0 0 0 0 0 0 <> <> 0 743 <> 0 0 1 <> <> <> <> <>
  744 2 21.185936 30.405844 23.341460 76 N A 2 0.50000 0.50000 "ASN " " CG " "    " 6 0 0 0 A0A0A0  C741  0 <> 1 0 0 0 0 0 0 <> <> 0 744 <> 0 0 1 <> <> <> <> <>
  745 15 22.174171 29.843076 23.797628 76 N A 70 -0.50000 -0.50000 "ASN " " OD1" "    " 8 0 0 0 FF2F2F  O742  0 <> 1 0 0 0 0 0 0 <> <> 0 745 <> 0 0 1 <> <> <> <> <>
  746 25 20.737554 30.142185 22.122490 76 N A 43 -0.76000 -0.76000 "ASN " " ND2" "    " 7 0 0 0 5757FF  N743  0 <> 1 0 0 0 0 0 0 <> <> 0 746 <> 0 0 1 <> <> <> <> <>
  747 43 21.210536 32.711980 22.078715 76 N A 21 0.30000 0.30000 "ASN " " H  " "    " 1 0 0 0 FFFFFF  H744  0 <> 1 0 0 0 0 0 0 <> <> 0 747 <> 0 0 1 <> <> <> <> <>
  748 41 20.533986 33.558167 24.772050 76 N A 21 0.06000 0.06000 "ASN " " HA " "    " 1 0 0 0 FFFFFF  H745  0 <> 1 0 0 0 0 0 0 <> <> 0 748 <> 0 0 1 <> <> <> <> <>
  749 41 20.329818 31.075967 25.175024 76 N A 21 0.06000 0.06000 "ASN " "1HB " "    " 1 0 0 0 FFFFFF  H746  0 <> 1 0 0 0 0 0 0 <> <> 0 749 <> 0 0 1 <> <> <> <> <>
  750 41 19.432206 31.578769 23.813926 76 N A 21 0.06000 0.06000 "ASN " "2HB " "    " 1 0 0 0 FFFFFF  H747  0 <> 1 0 0 0 0 0 0 <> <> 0 750 <> 0 0 1 <> <> <> <> <>
  751 43 21.178185 29.427899 21.563699 76 N A 21 0.38000 0.38000 "ASN " "1HD2" "    " 1 0 0 0 FFFFFF  H748  0 <> 1 0 0 0 0 0 0 <> <> 0 751 <> 0 0 1 <> <> <> <> <>
  752 43 19.919659 30.646007 21.763201 76 N A 21 0.38000 0.38000 "ASN " "2HD2" "    " 1 0 0 0 FFFFFF  H749  0 <> 1 0 0 0 0 0 0 <> <> 0 752 <> 0 0 1 <> <> <> <> <>
  753 25 22.520298 32.102590 26.105893 77 A A 43 -0.50000 -0.50000 "ALA " " N  " "    " 7 0 0 0 5757FF  N750  0 <> 1 0 0 0 0 0 0 <> <> 0 753 <> 0 0 1 <> <> <> <> <>
  754 3 23.675641 31.884916 26.979079 77 A A 2 0.14000 0.14000 "ALA " " CA " "    " 6 0 0 0 A0A0A0  C751  0 <> 1 0 0 0 0 0 0 <> <> 0 754 <> 0 0 1 <> <> <> <> <>
  755 2 24.838590 31.103251 26.339111 77 A A 2 0.50000 0.50000 "ALA " " C  " "    " 6 0 0 0 A0A0A0  C752  0 <> 1 0 0 0 0 0 0 <> <> 0 755 <> 0 0 1 <> <> <> <> <>
  756 15 25.976473 31.246970 26.782394 77 A A 70 -0.50000 -0.50000 "ALA " " O  " "    " 8 0 0 0 FF2F2F  O753  0 <> 1 0 0 0 0 0 0 <> <> 0 756 <> 0 0 1 <> <> <> <> <>
  757 3 23.200952 31.153502 28.243542 77 A A 2 -0.18000 -0.18000 "ALA " " CB " "    " 6 0 0 0 A0A0A0  C754  0 <> 1 0 0 0 0 0 0 <> <> 0 757 <> 0 0 1 <> <> <> <> <>
  758 43 21.636030 31.780458 26.466511 77 A A 21 0.30000 0.30000 "ALA " " H  " "    " 1 0 0 0 FFFFFF  H755  0 <> 1 0 0 0 0 0 0 <> <> 0 758 <> 0 0 1 <> <> <> <> <>
  759 41 24.056745 32.864186 27.270568 77 A A 21 0.06000 0.06000 "ALA " " HA " "    " 1 0 0 0 FFFFFF  H756  0 <> 1 0 0 0 0 0 0 <> <> 0 759 <> 0 0 1 <> <> <> <> <>
  760 41 24.025538 31.004262 28.941963 77 A A 21 0.06000 0.06000 "ALA " "1HB " "    " 1 0 0 0 FFFFFF  H757  0 <> 1 0 0 0 0 0 0 <> <> 0 760 <> 0 0 1 <> <> <> <> <>
  761 41 22.433106 31.723602 28.767554 77 A A 21 0.06000 0.06000 "ALA " "2HB " "    " 1 0 0 0 FFFFFF  H758  0 <> 1 0 0 0 0 0 0 <> <> 0 761 <> 0 0 1 <> <> <> <> <>
  762 41 22.791835 30.169059 28.008416 77 A A 21 0.06000 0.06000 "ALA " "3HB " "    " 1 0 0 0 FFFFFF  H759  0 <> 1 0 0 0 0 0 0 <> <> 0 762 <> 0 0 1 <> <> <> <> <>
  763 25 24.566338 30.305173 25.301534 78 H A 43 -0.50000 -0.50000 "HIS " " N  " "    " 7 0 0 0 5757FF  N760  0 <> 1 0 0 0 0 0 0 <> <> 0 763 <> 0 0 1 <> <> <> <> <>
  764 3 25.541651 29.501312 24.562851 78 H A 2 0.14000 0.14000 "HIS " " CA " "    " 6 0 0 0 A0A0A0  C761  0 <> 1 0 0 0 0 0 0 <> <> 0 764 <> 0 0 1 <> <> <> <> <>
  765 2 25.883594 30.145290 23.206472 78 H A 2 0.50000 0.50000 "HIS " " C  " "    " 6 0 0 0 A0A0A0  C762  0 <> 1 0 0 0 0 0 0 <> <> 0 765 <> 0 0 1 <> <> <> <> <>
  766 15 26.717832 29.616354 22.479241 78 H A 70 -0.50000 -0.50000 "HIS " " O  " "    " 8 0 0 0 FF2F2F  O763  0 <> 1 0 0 0 0 0 0 <> <> 0 766 <> 0 0 1 <> <> <> <> <>
  767 3 24.938792 28.101657 24.305369 78 H A 2 -0.00500 -0.00500 "HIS " " CB " "    " 6 0 0 0 A0A0A0  C764  0 <> 1 0 0 0 0 0 0 <> <> 0 767 <> 0 0 1 <> <> <> <> <>
  768 2 24.338456 27.448556 25.529037 78 H A 2 0.01500 0.01500 "HIS " " CG " "    " 6 0 0 0 A0A0A0  C765  0 <> 1 0 0 0 0 0 0 <> <> 0 768 <> 0 0 1 <> <> <> <> <>
  769 2 23.026265 27.234723 25.888114 78 H A 2 -0.01500 -0.01500 "HIS " " CD2" "    " 6 0 0 0 A0A0A0  C766  0 <> 1 0 0 0 0 0 0 <> <> 0 769 <> 0 0 1 <> <> <> <> <>
  770 25 25.094372 26.974164 26.589820 78 H A 43 -0.57000 -0.57000 "HIS " " ND1" "    " 7 0 0 0 5757FF  N767  0 <> 1 0 0 0 0 0 0 <> <> 0 770 <> 0 0 1 <> <> <> <> <>
  771 2 24.244102 26.510938 27.509608 78 H A 2 0.29500 0.29500 "HIS " " CE1" "    " 6 0 0 0 A0A0A0  C768  0 <> 1 0 0 0 0 0 0 <> <> 0 771 <> 0 0 1 <> <> <> <> <>
  772 25 22.974115 26.647170 27.153439 78 H A 43 -0.49000 -0.49000 "HIS " " NE2" "    " 7 0 0 0 5757FF  N769  0 <> 1 0 0 0 0 0 0 <> <> 0 772 <> 0 0 1 <> <> <> <> <>
  773 43 23.600605 30.215068 24.995648 78 H A 21 0.30000 0.30000 "HIS " " H  " "    " 1 0 0 0 FFFFFF  H770  0 <> 1 0 0 0 0 0 0 <> <> 0 773 <> 0 0 1 <> <> <> <> <>
  774 41 26.463810 29.390559 25.135578 78 H A 21 0.06000 0.06000 "HIS " " HA " "    " 1 0 0 0 FFFFFF  H771  0 <> 1 0 0 0 0 0 0 <> <> 0 774 <> 0 0 1 <> <> <> <> <>
  775 41 24.155777 28.161590 23.547833 78 H A 21 0.06000 0.06000 "HIS " "1HB " "    " 1 0 0 0 FFFFFF  H772  0 <> 1 0 0 0 0 0 0 <> <> 0 775 <> 0 0 1 <> <> <> <> <>
  776 41 25.697547 27.436878 23.889850 78 H A 21 0.06000 0.06000 "HIS " "2HB " "    " 1 0 0 0 FFFFFF  H773  0 <> 1 0 0 0 0 0 0 <> <> 0 776 <> 0 0 1 <> <> <> <> <>
  777 41 22.123079 27.476172 25.344366 78 H A 21 0.11500 0.11500 "HIS " " HD2" "    " 1 0 0 0 FFFFFF  H774  0 <> 1 0 0 0 0 0 0 <> <> 0 777 <> 0 0 1 <> <> <> <> <>
  778 43 26.100640 26.964366 26.661511 78 H A 21 0.42000 0.42000 "HIS " " HD1" "    " 1 0 0 0 FFFFFF  H775  0 <> 1 0 0 0 0 0 0 <> <> 0 778 <> 0 0 1 <> <> <> <> <>
  779 41 24.550711 26.073281 28.449863 78 H A 21 0.11500 0.11500 "HIS " " HE1" "    " 1 0 0 0 FFFFFF  H776  0 <> 1 0 0 0 0 0 0 <> <> 0 779 <> 0 0 1 <> <> <> <> <>
  780 25 25.267694 31.283704 22.861630 79 H A 43 -0.50000 -0.50000 "HIS " " N  " "    " 7 0 0 0 5757FF  N777  0 <> 1 0 0 0 0 0 0 <> <> 0 780 <> 0 0 1 <> <> <> <> <>
  781 3 25.437887 32.007624 21.600489 79 H A 2 0.14000 0.14000 "HIS " " CA " "    " 6 0 0 0 A0A0A0  C778  0 <> 1 0 0 0 0 0 0 <> <> 0 781 <> 0 0 1 <> <> <> <> <>
  782 2 25.420429 33.513501 21.891019 79 H A 2 0.50000 0.50000 "HIS " " C  " "    " 6 0 0 0 A0A0A0  C779  0 <> 1 0 0 0 0 0 0 <> <> 0 782 <> 0 0 1 <> <> <> <> <>
  783 15 24.743549 34.290334 21.220672 79 H A 70 -0.50000 -0.50000 "HIS " " O  " "    " 8 0 0 0 FF2F2F  O780  0 <> 1 0 0 0 0 0 0 <> <> 0 783 <> 0 0 1 <> <> <> <> <>
  784 3 24.415370 31.518026 20.550350 79 H A 2 -0.00500 -0.00500 "HIS " " CB " "    " 6 0 0 0 A0A0A0  C781  0 <> 1 0 0 0 0 0 0 <> <> 0 784 <> 0 0 1 <> <> <> <> <>
  785 2 24.655479 31.988888 19.132606 79 H A 2 0.01500 0.01500 "HIS " " CG " "    " 6 0 0 0 A0A0A0  C782  0 <> 1 0 0 0 0 0 0 <> <> 0 785 <> 0 0 1 <> <> <> <> <>
  786 2 25.803886 32.094295 18.377335 79 H A 2 -0.01500 -0.01500 "HIS " " CD2" "    " 6 0 0 0 A0A0A0  C783  0 <> 1 0 0 0 0 0 0 <> <> 0 786 <> 0 0 1 <> <> <> <> <>
  787 25 23.630797 32.385829 18.290088 79 H A 43 -0.57000 -0.57000 "HIS " " ND1" "    " 7 0 0 0 5757FF  N784  0 <> 1 0 0 0 0 0 0 <> <> 0 787 <> 0 0 1 <> <> <> <> <>
  788 2 24.168216 32.687763 17.108642 79 H A 2 0.29500 0.29500 "HIS " " CE1" "    " 6 0 0 0 A0A0A0  C785  0 <> 1 0 0 0 0 0 0 <> <> 0 788 <> 0 0 1 <> <> <> <> <>
  789 25 25.485807 32.546626 17.094514 79 H A 43 -0.49000 -0.49000 "HIS " " NE2" "    " 7 0 0 0 5757FF  N786  0 <> 1 0 0 0 0 0 0 <> <> 0 789 <> 0 0 1 <> <> <> <> <>
  790 43 24.623856 31.696697 23.528968 79 H A 21 0.30000 0.30000 "HIS " " H  " "    " 1 0 0 0 FFFFFF  H787  0 <> 1 0 0 0 0 0 0 <> <> 0 790 <> 0 0 1 <> <> <> <> <>
  791 41 26.435767 31.796532 21.211280 79 H A 21 0.06000 0.06000 "HIS " " HA " "    " 1 0 0 0 FFFFFF  H788  0 <> 1 0 0 0 0 0 0 <> <> 0 791 <> 0 0 1 <> <> <> <> <>
  792 41 24.409904 30.428050 20.520741 79 H A 21 0.06000 0.06000 "HIS " "1HB " "    " 1 0 0 0 FFFFFF  H789  0 <> 1 0 0 0 0 0 0 <> <> 0 792 <> 0 0 1 <> <> <> <> <>
  793 41 23.412241 31.818173 20.855625 79 H A 21 0.06000 0.06000 "HIS " "2HB " "    " 1 0 0 0 FFFFFF  H790  0 <> 1 0 0 0 0 0 0 <> <> 0 793 <> 0 0 1 <> <> <> <> <>
  794 41 26.826911 31.868673 18.644650 79 H A 21 0.11500 0.11500 "HIS " " HD2" "    " 1 0 0 0 FFFFFF  H791  0 <> 1 0 0 0 0 0 0 <> <> 0 794 <> 0 0 1 <> <> <> <> <>
  795 43 22.630448 32.467535 18.519210 79 H A 21 0.42000 0.42000 "HIS " " HD1" "    " 1 0 0 0 FFFFFF  H792  0 <> 1 0 0 0 0 0 0 <> <> 0 795 <> 0 0 1 <> <> <> <> <>
  796 41 23.595298 33.028893 16.257593 79 H A 21 0.11500 0.11500 "HIS " " HE1" "    " 1 0 0 0 FFFFFF  H793  0 <> 1 0 0 0 0 0 0 <> <> 0 796 <> 0 0 1 <> <> <> <> <>
  797 25 26.112887 33.918384 22.965389 80 K A 43 -0.50000 -0.50000 "LYS " " N  " "    " 7 0 0 0 5757FF  N794  0 <> 1 0 0 0 0 0 0 <> <> 0 797 <> 0 0 1 <> <> <> <> <>
  798 3 26.070652 35.263749 23.532844 80 K A 2 0.14000 0.14000 "LYS " " CA " "    " 6 0 0 0 A0A0A0  C795  0 <> 1 0 0 0 0 0 0 <> <> 0 798 <> 0 0 1 <> <> <> <> <>
  799 2 26.575909 36.292374 22.511395 80 K A 2 0.50000 0.50000 "LYS " " C  " "    " 6 0 0 0 A0A0A0  C796  0 <> 1 0 0 0 0 0 0 <> <> 0 799 <> 0 0 1 <> <> <> <> <>
  800 15 27.581504 36.046155 21.841287 80 K A 70 -0.50000 -0.50000 "LYS " " O  " "    " 8 0 0 0 FF2F2F  O797  0 <> 1 0 0 0 0 0 0 <> <> 0 800 <> 0 0 1 <> <> <> <> <>
  801 3 26.950064 35.326723 24.800241 80 K A 2 -0.12000 -0.12000 "LYS " " CB " "    " 6 0 0 0 A0A0A0  C798  0 <> 1 0 0 0 0 0 0 <> <> 0 801 <> 0 0 1 <> <> <> <> <>
  802 3 26.583724 34.301062 25.888781 80 K A 2 -0.12000 -0.12000 "LYS " " CG " "    " 6 0 0 0 A0A0A0  C799  0 <> 1 0 0 0 0 0 0 <> <> 0 802 <> 0 0 1 <> <> <> <> <>
  803 3 27.444366 34.429703 27.160105 80 K A 2 -0.12000 -0.12000 "LYS " " CD " "    " 6 0 0 0 A0A0A0  C800  0 <> 1 0 0 0 0 0 0 <> <> 0 803 <> 0 0 1 <> <> <> <> <>
  804 3 26.900583 35.453416 28.172868 80 K A 2 0.19000 0.19000 "LYS " " CE " "    " 6 0 0 0 A0A0A0  C801  0 <> 1 0 0 0 0 0 0 <> <> 0 804 <> 0 0 1 <> <> <> <> <>
  805 32 27.955119 35.934795 29.083729 80 K A 43 -0.30000 -0.30000 "LYS " " NZ " "    " 7 1 0 0 5757FF  N802  0 <> 1 0 0 0 0 0 0 <> <> 0 805 <> 0 0 1 <> <> <> <> <>
  806 43 26.628812 33.209684 23.460623 80 K A 21 0.30000 0.30000 "LYS " " H  " "    " 1 0 0 0 FFFFFF  H803  0 <> 1 0 0 0 0 0 0 <> <> 0 806 <> 0 0 1 <> <> <> <> <>
  807 41 25.032709 35.482717 23.791224 80 K A 21 0.06000 0.06000 "LYS " " HA " "    " 1 0 0 0 FFFFFF  H804  0 <> 1 0 0 0 0 0 0 <> <> 0 807 <> 0 0 1 <> <> <> <> <>
  808 41 27.995923 35.189348 24.518602 80 K A 21 0.06000 0.06000 "LYS " "1HB " "    " 1 0 0 0 FFFFFF  H805  0 <> 1 0 0 0 0 0 0 <> <> 0 808 <> 0 0 1 <> <> <> <> <>
  809 41 26.882107 36.330053 25.216633 80 K A 21 0.06000 0.06000 "LYS " "2HB " "    " 1 0 0 0 FFFFFF  H806  0 <> 1 0 0 0 0 0 0 <> <> 0 809 <> 0 0 1 <> <> <> <> <>
  810 41 25.521858 34.361366 26.130940 80 K A 21 0.06000 0.06000 "LYS " "1HG " "    " 1 0 0 0 FFFFFF  H807  0 <> 1 0 0 0 0 0 0 <> <> 0 810 <> 0 0 1 <> <> <> <> <>
  811 41 26.741248 33.304899 25.476689 80 K A 21 0.06000 0.06000 "LYS " "2HG " "    " 1 0 0 0 FFFFFF  H808  0 <> 1 0 0 0 0 0 0 <> <> 0 811 <> 0 0 1 <> <> <> <> <>
  812 41 27.503901 33.454505 27.647524 80 K A 21 0.06000 0.06000 "LYS " "1HD " "    " 1 0 0 0 FFFFFF  H809  0 <> 1 0 0 0 0 0 0 <> <> 0 812 <> 0 0 1 <> <> <> <> <>
  813 41 28.466567 34.674471 26.866409 80 K A 21 0.06000 0.06000 "LYS " "2HD " "    " 1 0 0 0 FFFFFF  H810  0 <> 1 0 0 0 0 0 0 <> <> 0 813 <> 0 0 1 <> <> <> <> <>
  814 41 26.467155 36.296930 27.645026 80 K A 21 0.06000 0.06000 "LYS " "1HE " "    " 1 0 0 0 FFFFFF  H811  0 <> 1 0 0 0 0 0 0 <> <> 0 814 <> 0 0 1 <> <> <> <> <>
  815 41 26.086894 35.017426 28.754759 80 K A 21 0.06000 0.06000 "LYS " "2HE " "    " 1 0 0 0 FFFFFF  H812  0 <> 1 0 0 0 0 0 0 <> <> 0 815 <> 0 0 1 <> <> <> <> <>
  816 44 27.639789 36.712092 29.668667 80 K A 21 0.33000 0.33000 "LYS " "1HZ " "    " 1 0 0 0 FFFFFF  H813  0 <> 1 0 0 0 0 0 0 <> <> 0 816 <> 0 0 1 <> <> <> <> <>
  817 44 28.272638 35.200935 29.693431 80 K A 21 0.33000 0.33000 "LYS " "2HZ " "    " 1 0 0 0 FFFFFF  H814  0 <> 1 0 0 0 0 0 0 <> <> 0 817 <> 0 0 1 <> <> <> <> <>
  818 44 28.762133 36.271160 28.552336 80 K A 21 0.33000 0.33000 "LYS " "3HZ " "    " 1 0 0 0 FFFFFF  H815  0 <> 1 0 0 0 0 0 0 <> <> 0 818 <> 0 0 1 <> <> <> <> <>
  819 25 25.879642 37.429418 22.392157 81 L A 43 -0.50000 -0.50000 "LEU " " N  " "    " 7 0 0 0 5757FF  N816  2 <> 1 0 0 0 0 0 0 <> <> 0 819 <> 0 0 1 <> <> <> <> <>
  820 3 26.193904 38.482409 21.427007 81 L A 2 0.14000 0.14000 "LEU " " CA " "    " 6 0 0 0 A0A0A0  C817  2 <> 1 0 0 0 0 0 0 <> <> 0 820 <> 0 0 1 <> <> <> <> <>
  821 2 27.572206 39.093659 21.762180 81 L A 2 0.50000 0.50000 "LEU " " C  " "    " 6 0 0 0 A0A0A0  C818  2 <> 1 0 0 0 0 0 0 <> <> 0 821 <> 0 0 1 <> <> <> <> <>
  822 15 27.750216 39.678716 22.830028 81 L A 70 -0.50000 -0.50000 "LEU " " O  " "    " 8 0 0 0 FF2F2F  O819  2 <> 1 0 0 0 0 0 0 <> <> 0 822 <> 0 0 1 <> <> <> <> <>
  823 3 25.065555 39.542358 21.453247 81 L A 2 -0.12000 -0.12000 "LEU " " CB " "    " 6 0 0 0 A0A0A0  C820  2 <> 1 0 0 0 0 0 0 <> <> 0 823 <> 0 0 1 <> <> <> <> <>
  824 3 25.060440 40.484511 20.230033 81 L A 2 -0.06000 -0.06000 "LEU " " CG " "    " 6 0 0 0 A0A0A0  C821  2 <> 1 0 0 0 0 0 0 <> <> 0 824 <> 0 0 1 <> <> <> <> <>
  825 3 24.508576 39.789138 18.976663 81 L A 2 -0.18000 -0.18000 "LEU " " CD1" "    " 6 0 0 0 A0A0A0  C822  2 <> 1 0 0 0 0 0 0 <> <> 0 825 <> 0 0 1 <> <> <> <> <>
  826 3 24.268513 41.773921 20.500976 81 L A 2 -0.18000 -0.18000 "LEU " " CD2" "    " 6 0 0 0 A0A0A0  C823  2 <> 1 0 0 0 0 0 0 <> <> 0 826 <> 0 0 1 <> <> <> <> <>
  827 43 25.053981 37.534817 22.965811 81 L A 21 0.30000 0.30000 "LEU " " H  " "    " 1 0 0 0 FFFFFF  H824  2 <> 1 0 0 0 0 0 0 <> <> 0 827 <> 0 0 1 <> <> <> <> <>
  828 41 26.226342 38.005986 20.450227 81 L A 21 0.06000 0.06000 "LEU " " HA " "    " 1 0 0 0 FFFFFF  H825  2 <> 1 0 0 0 0 0 0 <> <> 0 828 <> 0 0 1 <> <> <> <> <>
  829 41 24.093462 39.052495 21.515424 81 L A 21 0.06000 0.06000 "LEU " "1HB " "    " 1 0 0 0 FFFFFF  H826  2 <> 1 0 0 0 0 0 0 <> <> 0 829 <> 0 0 1 <> <> <> <> <>
  830 41 25.159474 40.131533 22.363525 81 L A 21 0.06000 0.06000 "LEU " "2HB " "    " 1 0 0 0 FFFFFF  H827  2 <> 1 0 0 0 0 0 0 <> <> 0 830 <> 0 0 1 <> <> <> <> <>
  831 41 26.090179 40.777073 20.017421 81 L A 21 0.06000 0.06000 "LEU " " HG " "    " 1 0 0 0 FFFFFF  H828  2 <> 1 0 0 0 0 0 0 <> <> 0 831 <> 0 0 1 <> <> <> <> <>
  832 41 24.803368 40.338395 18.082900 81 L A 21 0.06000 0.06000 "LEU " "1HD1" "    " 1 0 0 0 FFFFFF  H829  2 <> 1 0 0 0 0 0 0 <> <> 0 832 <> 0 0 1 <> <> <> <> <>
  833 41 24.884183 38.775569 18.855451 81 L A 21 0.06000 0.06000 "LEU " "2HD1" "    " 1 0 0 0 FFFFFF  H830  2 <> 1 0 0 0 0 0 0 <> <> 0 833 <> 0 0 1 <> <> <> <> <>
  834 41 23.420534 39.723033 18.991542 81 L A 21 0.06000 0.06000 "LEU " "3HD1" "    " 1 0 0 0 FFFFFF  H831  2 <> 1 0 0 0 0 0 0 <> <> 0 834 <> 0 0 1 <> <> <> <> <>
  835 41 24.396999 42.487392 19.685807 81 L A 21 0.06000 0.06000 "LEU " "1HD2" "    " 1 0 0 0 FFFFFF  H832  2 <> 1 0 0 0 0 0 0 <> <> 0 835 <> 0 0 1 <> <> <> <> <>
  836 41 23.203600 41.581458 20.591309 81 L A 21 0.06000 0.06000 "LEU " "2HD2" "    " 1 0 0 0 FFFFFF  H833  2 <> 1 0 0 0 0 0 0 <> <> 0 836 <> 0 0 1 <> <> <> <> <>
  837 41 24.585377 42.264063 21.419838 81 L A 21 0.06000 0.06000 "LEU " "3HD2" "    " 1 0 0 0 FFFFFF  H834  2 <> 1 0 0 0 0 0 0 <> <> 0 837 <> 0 0 1 <> <> <> <> <>
  838 25 28.556869 38.907315 20.882911 82 K A 43 -0.50000 -0.50000 "LYS " " N  " "    " 7 0 0 0 5757FF  N835  2 <> 1 0 0 0 0 0 0 <> <> 0 838 <> 0 0 1 <> <> <> <> <>
  839 3 29.963615 39.247961 21.057643 82 K A 2 0.14000 0.14000 "LYS " " CA " "    " 6 0 0 0 A0A0A0  C836  2 <> 1 0 0 0 0 0 0 <> <> 0 839 <> 0 0 1 <> <> <> <> <>
  840 2 30.153872 40.697989 20.572145 82 K A 2 0.50000 0.50000 "LYS " " C  " "    " 6 0 0 0 A0A0A0  C837  2 <> 1 0 0 0 0 0 0 <> <> 0 840 <> 0 0 1 <> <> <> <> <>
  841 15 30.707811 40.956319 19.504304 82 K A 70 -0.50000 -0.50000 "LYS " " O  " "    " 8 0 0 0 FF2F2F  O838  2 <> 1 0 0 0 0 0 0 <> <> 0 841 <> 0 0 1 <> <> <> <> <>
  842 3 30.789858 38.220354 20.241683 82 K A 2 -0.12000 -0.12000 "LYS " " CB " "    " 6 0 0 0 A0A0A0  C839  2 <> 1 0 0 0 0 0 0 <> <> 0 842 <> 0 0 1 <> <> <> <> <>
  843 3 32.327927 38.350257 20.292716 82 K A 2 -0.12000 -0.12000 "LYS " " CG " "    " 6 0 0 0 A0A0A0  C840  2 <> 1 0 0 0 0 0 0 <> <> 0 843 <> 0 0 1 <> <> <> <> <>
  844 3 32.955830 37.826913 21.595758 82 K A 2 -0.12000 -0.12000 "LYS " " CD " "    " 6 0 0 0 A0A0A0  C841  2 <> 1 0 0 0 0 0 0 <> <> 0 844 <> 0 0 1 <> <> <> <> <>
  845 3 34.489120 37.713026 21.516043 82 K A 2 0.19000 0.19000 "LYS " " CE " "    " 6 0 0 0 A0A0A0  C842  2 <> 1 0 0 0 0 0 0 <> <> 0 845 <> 0 0 1 <> <> <> <> <>
  846 32 35.141725 39.031323 21.537732 82 K A 43 -0.30000 -0.30000 "LYS " " NZ " "    " 7 1 0 0 5757FF  N843  2 <> 1 0 0 0 0 0 0 <> <> 0 846 <> 0 0 1 <> <> <> <> <>
  847 43 28.273643 38.582629 19.957504 82 K A 21 0.30000 0.30000 "LYS " " H  " "    " 1 0 0 0 FFFFFF  H844  2 <> 1 0 0 0 0 0 0 <> <> 0 847 <> 0 0 1 <> <> <> <> <>
  848 41 30.239060 39.165373 22.105825 82 K A 21 0.06000 0.06000 "LYS " " HA " "    " 1 0 0 0 FFFFFF  H845  2 <> 1 0 0 0 0 0 0 <> <> 0 848 <> 0 0 1 <> <> <> <> <>
  849 41 30.512952 37.214316 20.560117 82 K A 21 0.06000 0.06000 "LYS " "1HB " "    " 1 0 0 0 FFFFFF  H846  2 <> 1 0 0 0 0 0 0 <> <> 0 849 <> 0 0 1 <> <> <> <> <>
  850 41 30.480932 38.260677 19.201960 82 K A 21 0.06000 0.06000 "LYS " "2HB " "    " 1 0 0 0 FFFFFF  H847  2 <> 1 0 0 0 0 0 0 <> <> 0 850 <> 0 0 1 <> <> <> <> <>
  851 41 32.725949 37.769351 19.458683 82 K A 21 0.06000 0.06000 "LYS " "1HG " "    " 1 0 0 0 FFFFFF  H848  2 <> 1 0 0 0 0 0 0 <> <> 0 851 <> 0 0 1 <> <> <> <> <>
  852 41 32.637875 39.377488 20.100122 82 K A 21 0.06000 0.06000 "LYS " "2HG " "    " 1 0 0 0 FFFFFF  H849  2 <> 1 0 0 0 0 0 0 <> <> 0 852 <> 0 0 1 <> <> <> <> <>
  853 41 32.655661 38.446351 22.443130 82 K A 21 0.06000 0.06000 "LYS " "1HD " "    " 1 0 0 0 FFFFFF  H850  2 <> 1 0 0 0 0 0 0 <> <> 0 853 <> 0 0 1 <> <> <> <> <>
  854 41 32.554131 36.832353 21.797776 82 K A 21 0.06000 0.06000 "LYS " "2HD " "    " 1 0 0 0 FFFFFF  H851  2 <> 1 0 0 0 0 0 0 <> <> 0 854 <> 0 0 1 <> <> <> <> <>
  855 41 34.858667 37.139888 22.367807 82 K A 21 0.06000 0.06000 "LYS " "1HE " "    " 1 0 0 0 FFFFFF  H852  2 <> 1 0 0 0 0 0 0 <> <> 0 855 <> 0 0 1 <> <> <> <> <>
  856 41 34.790037 37.169686 20.618122 82 K A 21 0.06000 0.06000 "LYS " "2HE " "    " 1 0 0 0 FFFFFF  H853  2 <> 1 0 0 0 0 0 0 <> <> 0 856 <> 0 0 1 <> <> <> <> <>
  857 44 36.143929 38.941696 21.462372 82 K A 21 0.33000 0.33000 "LYS " "1HZ " "    " 1 0 0 0 FFFFFF  H854  2 <> 1 0 0 0 0 0 0 <> <> 0 857 <> 0 0 1 <> <> <> <> <>
  858 44 34.814170 39.624023 20.784386 82 K A 21 0.33000 0.33000 "LYS " "2HZ " "    " 1 0 0 0 FFFFFF  H855  2 <> 1 0 0 0 0 0 0 <> <> 0 858 <> 0 0 1 <> <> <> <> <>
  859 44 34.931295 39.497097 22.425899 82 K A 21 0.33000 0.33000 "LYS " "3HZ " "    " 1 0 0 0 FFFFFF  H856  2 <> 1 0 0 0 0 0 0 <> <> 0 859 <> 0 0 1 <> <> <> <> <>
  860 25 29.637109 41.649794 21.353853 83 V A 43 -0.50000 -0.50000 "VAL " " N  " "    " 7 0 0 0 5757FF  N857  2 <> 1 0 0 0 0 0 0 <> <> 0 860 <> 0 0 1 <> <> <> <> <>
  861 3 29.612893 43.067137 21.014256 83 V A 2 0.14000 0.14000 "VAL " " CA " "    " 6 0 0 0 A0A0A0  C858  2 <> 1 0 0 0 0 0 0 <> <> 0 861 <> 0 0 1 <> <> <> <> <>
  862 2 30.995650 43.673998 21.297398 83 V A 2 0.50000 0.50000 "VAL " " C  " "    " 6 0 0 0 A0A0A0  C859  2 <> 1 0 0 0 0 0 0 <> <> 0 862 <> 0 0 1 <> <> <> <> <>
  863 15 31.461297 43.682306 22.441367 83 V A 70 -0.50000 -0.50000 "VAL " " O  " "    " 8 0 0 0 FF2F2F  O860  2 <> 1 0 0 0 0 0 0 <> <> 0 863 <> 0 0 1 <> <> <> <> <>
  864 3 28.529657 43.779887 21.862877 83 V A 2 -0.06000 -0.06000 "VAL " " CB " "    " 6 0 0 0 A0A0A0  C861  2 <> 1 0 0 0 0 0 0 <> <> 0 864 <> 0 0 1 <> <> <> <> <>
  865 3 28.483052 45.289486 21.579862 83 V A 2 -0.18000 -0.18000 "VAL " " CG1" "    " 6 0 0 0 A0A0A0  C862  2 <> 1 0 0 0 0 0 0 <> <> 0 865 <> 0 0 1 <> <> <> <> <>
  866 3 27.139315 43.185713 21.595220 83 V A 2 -0.18000 -0.18000 "VAL " " CG2" "    " 6 0 0 0 A0A0A0  C863  2 <> 1 0 0 0 0 0 0 <> <> 0 866 <> 0 0 1 <> <> <> <> <>
  867 43 29.191074 41.355555 22.211342 83 V A 21 0.30000 0.30000 "VAL " " H  " "    " 1 0 0 0 FFFFFF  H864  2 <> 1 0 0 0 0 0 0 <> <> 0 867 <> 0 0 1 <> <> <> <> <>
  868 41 29.360659 43.176715 19.958665 83 V A 21 0.06000 0.06000 "VAL " " HA " "    " 1 0 0 0 FFFFFF  H865  2 <> 1 0 0 0 0 0 0 <> <> 0 868 <> 0 0 1 <> <> <> <> <>
  869 41 28.752448 43.646277 22.922477 83 V A 21 0.06000 0.06000 "VAL " " HB " "    " 1 0 0 0 FFFFFF  H866  2 <> 1 0 0 0 0 0 0 <> <> 0 869 <> 0 0 1 <> <> <> <> <>
  870 41 27.645226 45.762665 22.083678 83 V A 21 0.06000 0.06000 "VAL " "1HG1" "    " 1 0 0 0 FFFFFF  H867  2 <> 1 0 0 0 0 0 0 <> <> 0 870 <> 0 0 1 <> <> <> <> <>
  871 41 29.383520 45.809566 21.906859 83 V A 21 0.06000 0.06000 "VAL " "2HG1" "    " 1 0 0 0 FFFFFF  H868  2 <> 1 0 0 0 0 0 0 <> <> 0 871 <> 0 0 1 <> <> <> <> <>
  872 41 28.366083 45.463615 20.511763 83 V A 21 0.06000 0.06000 "VAL " "3HG1" "    " 1 0 0 0 FFFFFF  H869  2 <> 1 0 0 0 0 0 0 <> <> 0 872 <> 0 0 1 <> <> <> <> <>
  873 41 26.380916 43.664613 22.210912 83 V A 21 0.06000 0.06000 "VAL " "1HG2" "    " 1 0 0 0 FFFFFF  H870  2 <> 1 0 0 0 0 0 0 <> <> 0 873 <> 0 0 1 <> <> <> <> <>
  874 41 26.848258 43.323331 20.553834 83 V A 21 0.06000 0.06000 "VAL " "2HG2" "    " 1 0 0 0 FFFFFF  H871  2 <> 1 0 0 0 0 0 0 <> <> 0 874 <> 0 0 1 <> <> <> <> <>
  875 41 27.101757 42.119748 21.805811 83 V A 21 0.06000 0.06000 "VAL " "3HG2" "    " 1 0 0 0 FFFFFF  H872  2 <> 1 0 0 0 0 0 0 <> <> 0 875 <> 0 0 1 <> <> <> <> <>
  876 25 31.637517 44.186793 20.252783 84 F A 43 -0.50000 -0.50000 "PHE " " N  " "    " 7 0 0 0 5757FF  N873  2 <> 1 0 0 0 0 0 0 <> <> 0 876 <> 0 0 1 <> <> <> <> <>
  877 3 32.863337 44.957443 20.315639 84 F A 2 0.14000 0.14000 "PHE " " CA " "    " 6 0 0 0 A0A0A0  C874  2 <> 1 0 0 0 0 0 0 <> <> 0 877 <> 0 0 1 <> <> <> <> <>
  878 2 32.472883 46.431205 20.178345 84 F A 2 0.50000 0.50000 "PHE " " C  " "    " 6 0 0 0 A0A0A0  C875  2 <> 1 0 0 0 0 0 0 <> <> 0 878 <> 0 0 1 <> <> <> <> <>
  879 15 32.030916 46.874104 19.117274 84 F A 70 -0.50000 -0.50000 "PHE " " O  " "    " 8 0 0 0 FF2F2F  O876  2 <> 1 0 0 0 0 0 0 <> <> 0 879 <> 0 0 1 <> <> <> <> <>
  880 3 33.744740 44.561136 19.122861 84 F A 2 -0.00500 -0.00500 "PHE " " CB " "    " 6 0 0 0 A0A0A0  C877  2 <> 1 0 0 0 0 0 0 <> <> 0 880 <> 0 0 1 <> <> <> <> <>
  881 2 34.448654 43.224819 19.282536 84 F A 2 -0.11500 -0.11500 "PHE " " CG " "    " 6 0 0 0 A0A0A0  C878  2 <> 1 0 0 0 0 0 0 <> <> 0 881 <> 0 0 1 <> <> <> <> <>
  882 2 34.024613 42.111123 18.533259 84 F A 2 -0.11500 -0.11500 "PHE " " CD2" "    " 6 0 0 0 A0A0A0  C879  2 <> 1 0 0 0 0 0 0 <> <> 0 882 <> 0 0 1 <> <> <> <> <>
  883 2 35.570161 43.105750 20.129515 84 F A 2 -0.11500 -0.11500 "PHE " " CD1" "    " 6 0 0 0 A0A0A0  C880  2 <> 1 0 0 0 0 0 0 <> <> 0 883 <> 0 0 1 <> <> <> <> <>
  884 2 34.788947 40.930990 18.533636 84 F A 2 -0.11500 -0.11500 "PHE " " CE2" "    " 6 0 0 0 A0A0A0  C881  2 <> 1 0 0 0 0 0 0 <> <> 0 884 <> 0 0 1 <> <> <> <> <>
  885 2 36.331215 41.923233 20.133901 84 F A 2 -0.11500 -0.11500 "PHE " " CE1" "    " 6 0 0 0 A0A0A0  C882  2 <> 1 0 0 0 0 0 0 <> <> 0 885 <> 0 0 1 <> <> <> <> <>
  886 2 35.969863 40.854053 19.293399 84 F A 2 -0.11500 -0.11500 "PHE " " CZ " "    " 6 0 0 0 A0A0A0  C883  2 <> 1 0 0 0 0 0 0 <> <> 0 886 <> 0 0 1 <> <> <> <> <>
  887 43 31.158910 44.182648 19.349210 84 F A 21 0.30000 0.30000 "PHE " " H  " "    " 1 0 0 0 FFFFFF  H884  2 <> 1 0 0 0 0 0 0 <> <> 0 887 <> 0 0 1 <> <> <> <> <>
  888 41 33.410858 44.794883 21.244325 84 F A 21 0.06000 0.06000 "PHE " " HA " "    " 1 0 0 0 FFFFFF  H885  2 <> 1 0 0 0 0 0 0 <> <> 0 888 <> 0 0 1 <> <> <> <> <>
  889 41 33.161997 44.560681 18.198622 84 F A 21 0.06000 0.06000 "PHE " "1HB " "    " 1 0 0 0 FFFFFF  H886  2 <> 1 0 0 0 0 0 0 <> <> 0 889 <> 0 0 1 <> <> <> <> <>
  890 41 34.514850 45.316470 18.963463 84 F A 21 0.06000 0.06000 "PHE " "2HB " "    " 1 0 0 0 FFFFFF  H887  2 <> 1 0 0 0 0 0 0 <> <> 0 890 <> 0 0 1 <> <> <> <> <>
  891 41 33.141276 42.176986 17.915484 84 F A 21 0.11500 0.11500 "PHE " " HD2" "    " 1 0 0 0 FFFFFF  H888  2 <> 1 0 0 0 0 0 0 <> <> 0 891 <> 0 0 1 <> <> <> <> <>
  892 41 35.888055 43.934686 20.742075 84 F A 21 0.11500 0.11500 "PHE " " HD1" "    " 1 0 0 0 FFFFFF  H889  2 <> 1 0 0 0 0 0 0 <> <> 0 892 <> 0 0 1 <> <> <> <> <>
  893 41 34.497407 40.112085 17.896668 84 F A 21 0.11500 0.11500 "PHE " " HE2" "    " 1 0 0 0 FFFFFF  H890  2 <> 1 0 0 0 0 0 0 <> <> 0 893 <> 0 0 1 <> <> <> <> <>
  894 41 37.233454 41.872166 20.728597 84 F A 21 0.11500 0.11500 "PHE " " HE1" "    " 1 0 0 0 FFFFFF  H891  2 <> 1 0 0 0 0 0 0 <> <> 0 894 <> 0 0 1 <> <> <> <> <>
  895 41 36.612868 39.989421 19.204887 84 F A 21 0.11500 0.11500 "PHE " " HZ " "    " 1 0 0 0 FFFFFF  H892  2 <> 1 0 0 0 0 0 0 <> <> 0 895 <> 0 0 1 <> <> <> <> <>
  896 25 32.630674 47.193833 21.260410 85 V A 43 -0.50000 -0.50000 "VAL " " N  " "    " 7 0 0 0 5757FF  N893  2 <> 1 0 0 0 0 0 0 <> <> 0 896 <> 0 0 1 <> <> <> <> <>
  897 3 32.461056 48.640872 21.267421 85 V A 2 0.14000 0.14000 "VAL " " CA " "    " 6 0 0 0 A0A0A0  C894  2 <> 1 0 0 0 0 0 0 <> <> 0 897 <> 0 0 1 <> <> <> <> <>
  898 2 33.810409 49.250815 20.834801 85 V A 2 0.50000 0.50000 "VAL " " C  " "    " 6 0 0 0 A0A0A0  C895  2 <> 1 0 0 0 0 0 0 <> <> 0 898 <> 0 0 1 <> <> <> <> <>
  899 15 34.844851 48.874411 21.379386 85 V A 70 -0.50000 -0.50000 "VAL " " O  " "    " 8 0 0 0 FF2F2F  O896  2 <> 1 0 0 0 0 0 0 <> <> 0 899 <> 0 0 1 <> <> <> <> <>
  900 3 32.062459 49.076638 22.700786 85 V A 2 -0.06000 -0.06000 "VAL " " CB " "    " 6 0 0 0 A0A0A0  C897  2 <> 1 0 0 0 0 0 0 <> <> 0 900 <> 0 0 1 <> <> <> <> <>
  901 3 31.886902 50.596185 22.830480 85 V A 2 -0.18000 -0.18000 "VAL " " CG1" "    " 6 0 0 0 A0A0A0  C898  2 <> 1 0 0 0 0 0 0 <> <> 0 901 <> 0 0 1 <> <> <> <> <>
  902 3 30.768476 48.376741 23.162881 85 V A 2 -0.18000 -0.18000 "VAL " " CG2" "    " 6 0 0 0 A0A0A0  C899  2 <> 1 0 0 0 0 0 0 <> <> 0 902 <> 0 0 1 <> <> <> <> <>
  903 43 32.966995 46.755188 22.114168 85 V A 21 0.30000 0.30000 "VAL " " H  " "    " 1 0 0 0 FFFFFF  H900  2 <> 1 0 0 0 0 0 0 <> <> 0 903 <> 0 0 1 <> <> <> <> <>
  904 41 31.675552 48.912318 20.573141 85 V A 21 0.06000 0.06000 "VAL " " HA " "    " 1 0 0 0 FFFFFF  H901  2 <> 1 0 0 0 0 0 0 <> <> 0 904 <> 0 0 1 <> <> <> <> <>
  905 41 32.860121 48.782267 23.382418 85 V A 21 0.06000 0.06000 "VAL " " HB " "    " 1 0 0 0 FFFFFF  H902  2 <> 1 0 0 0 0 0 0 <> <> 0 905 <> 0 0 1 <> <> <> <> <>
  906 41 31.613905 50.878949 23.846257 85 V A 21 0.06000 0.06000 "VAL " "1HG1" "    " 1 0 0 0 FFFFFF  H903  2 <> 1 0 0 0 0 0 0 <> <> 0 906 <> 0 0 1 <> <> <> <> <>
  907 41 32.808887 51.126396 22.594244 85 V A 21 0.06000 0.06000 "VAL " "2HG1" "    " 1 0 0 0 FFFFFF  H904  2 <> 1 0 0 0 0 0 0 <> <> 0 907 <> 0 0 1 <> <> <> <> <>
  908 41 31.106632 50.958519 22.159625 85 V A 21 0.06000 0.06000 "VAL " "3HG1" "    " 1 0 0 0 FFFFFF  H905  2 <> 1 0 0 0 0 0 0 <> <> 0 908 <> 0 0 1 <> <> <> <> <>
  909 41 30.421240 48.781937 24.110489 85 V A 21 0.06000 0.06000 "VAL " "1HG2" "    " 1 0 0 0 FFFFFF  H906  2 <> 1 0 0 0 0 0 0 <> <> 0 909 <> 0 0 1 <> <> <> <> <>
  910 41 29.962450 48.510544 22.441441 85 V A 21 0.06000 0.06000 "VAL " "2HG2" "    " 1 0 0 0 FFFFFF  H907  2 <> 1 0 0 0 0 0 0 <> <> 0 910 <> 0 0 1 <> <> <> <> <>
  911 41 30.914907 47.304764 23.301619 85 V A 21 0.06000 0.06000 "VAL " "3HG2" "    " 1 0 0 0 FFFFFF  H908  2 <> 1 0 0 0 0 0 0 <> <> 0 911 <> 0 0 1 <> <> <> <> <>
  912 25 33.836186 50.154376 19.851959 86 V A 43 -0.50000 -0.50000 "VAL " " N  " "    " 7 0 0 0 5757FF  N909  0 <> 1 0 0 0 0 0 0 <> <> 0 912 <> 0 0 1 <> <> <> <> <>
  913 3 35.073088 50.581140 19.183818 86 V A 2 0.14000 0.14000 "VAL " " CA " "    " 6 0 0 0 A0A0A0  C910  0 <> 1 0 0 0 0 0 0 <> <> 0 913 <> 0 0 1 <> <> <> <> <>
  914 2 35.226519 52.114906 19.264013 86 V A 2 0.50000 0.50000 "VAL " " C  " "    " 6 0 0 0 A0A0A0  C911  0 <> 1 0 0 0 0 0 0 <> <> 0 914 <> 0 0 1 <> <> <> <> <>
  915 15 34.674291 52.809730 18.409904 86 V A 70 -0.50000 -0.50000 "VAL " " O  " "    " 8 0 0 0 FF2F2F  O912  0 <> 1 0 0 0 0 0 0 <> <> 0 915 <> 0 0 1 <> <> <> <> <>
  916 3 35.114728 49.980808 17.747218 86 V A 2 -0.06000 -0.06000 "VAL " " CB " "    " 6 0 0 0 A0A0A0  C913  0 <> 1 0 0 0 0 0 0 <> <> 0 916 <> 0 0 1 <> <> <> <> <>
  917 3 36.418989 50.310774 17.004724 86 V A 2 -0.18000 -0.18000 "VAL " " CG1" "    " 6 0 0 0 A0A0A0  C914  0 <> 1 0 0 0 0 0 0 <> <> 0 917 <> 0 0 1 <> <> <> <> <>
  918 3 34.915014 48.451280 17.757327 86 V A 2 -0.18000 -0.18000 "VAL " " CG2" "    " 6 0 0 0 A0A0A0  C915  0 <> 1 0 0 0 0 0 0 <> <> 0 918 <> 0 0 1 <> <> <> <> <>
  919 43 32.948237 50.456983 19.457000 86 V A 21 0.30000 0.30000 "VAL " " H  " "    " 1 0 0 0 FFFFFF  H916  0 <> 1 0 0 0 0 0 0 <> <> 0 919 <> 0 0 1 <> <> <> <> <>
  920 41 35.947092 50.161005 19.679176 86 V A 21 0.06000 0.06000 "VAL " " HA " "    " 1 0 0 0 FFFFFF  H917  0 <> 1 0 0 0 0 0 0 <> <> 0 920 <> 0 0 1 <> <> <> <> <>
  921 41 34.300498 50.412071 17.162163 86 V A 21 0.06000 0.06000 "VAL " " HB " "    " 1 0 0 0 FFFFFF  H918  0 <> 1 0 0 0 0 0 0 <> <> 0 921 <> 0 0 1 <> <> <> <> <>
  922 41 36.421204 49.870240 16.007530 86 V A 21 0.06000 0.06000 "VAL " "1HG1" "    " 1 0 0 0 FFFFFF  H919  0 <> 1 0 0 0 0 0 0 <> <> 0 922 <> 0 0 1 <> <> <> <> <>
  923 41 36.554915 51.385400 16.883082 86 V A 21 0.06000 0.06000 "VAL " "2HG1" "    " 1 0 0 0 FFFFFF  H920  0 <> 1 0 0 0 0 0 0 <> <> 0 923 <> 0 0 1 <> <> <> <> <>
  924 41 37.285995 49.921552 17.536279 86 V A 21 0.06000 0.06000 "VAL " "3HG1" "    " 1 0 0 0 FFFFFF  H921  0 <> 1 0 0 0 0 0 0 <> <> 0 924 <> 0 0 1 <> <> <> <> <>
  925 41 35.265277 47.986797 16.836790 86 V A 21 0.06000 0.06000 "VAL " "1HG2" "    " 1 0 0 0 FFFFFF  H922  0 <> 1 0 0 0 0 0 0 <> <> 0 925 <> 0 0 1 <> <> <> <> <>
  926 41 35.461688 47.977968 18.570267 86 V A 21 0.06000 0.06000 "VAL " "2HG2" "    " 1 0 0 0 FFFFFF  H923  0 <> 1 0 0 0 0 0 0 <> <> 0 926 <> 0 0 1 <> <> <> <> <>
  927 41 33.863222 48.196568 17.875054 86 V A 21 0.06000 0.06000 "VAL " "3HG2" "    " 1 0 0 0 FFFFFF  H924  0 <> 1 0 0 0 0 0 0 <> <> 0 927 <> 0 0 1 <> <> <> <> <>
  928 25 35.915681 52.671166 20.290955 87 P A 43 -0.14000 -0.14000 "PRO " " N  " "    " 7 0 0 0 5757FF  N925  0 <> 1 0 0 0 0 0 0 <> <> 0 928 <> 0 0 1 <> <> <> <> <>
  929 3 36.254955 54.102977 20.387105 87 P A 2 0.01000 0.01000 "PRO " " CA " "    " 6 0 0 0 A0A0A0  C926  0 <> 1 0 0 0 0 0 0 <> <> 0 929 <> 0 0 1 <> <> <> <> <>
  930 2 37.003986 54.642084 19.154780 87 P A 2 0.50000 0.50000 "PRO " " C  " "    " 6 0 0 0 A0A0A0  C927  0 <> 1 0 0 0 0 0 0 <> <> 0 930 <> 0 0 1 <> <> <> <> <>
  931 15 37.990096 54.051034 18.713983 87 P A 70 -0.50000 -0.50000 "PRO " " O  " "    " 8 0 0 0 FF2F2F  O928  0 <> 1 0 0 0 0 0 0 <> <> 0 931 <> 0 0 1 <> <> <> <> <>
  932 3 36.320919 51.956991 21.504738 87 P A 2 -0.05000 -0.05000 "PRO " " CD " "    " 6 0 0 0 A0A0A0  C929  0 <> 1 0 0 0 0 0 0 <> <> 0 932 <> 0 0 1 <> <> <> <> <>
  933 3 37.137957 54.227602 21.640719 87 P A 2 -0.12000 -0.12000 "PRO " " CB " "    " 6 0 0 0 A0A0A0  C930  0 <> 1 0 0 0 0 0 0 <> <> 0 933 <> 0 0 1 <> <> <> <> <>
  934 3 36.779837 53.023424 22.495020 87 P A 2 -0.12000 -0.12000 "PRO " " CG " "    " 6 0 0 0 A0A0A0  C931  0 <> 1 0 0 0 0 0 0 <> <> 0 934 <> 0 0 1 <> <> <> <> <>
  935 41 35.510439 51.365836 21.929769 87 P A 21 0.06000 0.06000 "PRO " "1HD " "    " 1 0 0 0 FFFFFF  H932  0 <> 1 0 0 0 0 0 0 <> <> 0 935 <> 0 0 1 <> <> <> <> <>
  936 41 37.149301 51.287755 21.267225 87 P A 21 0.06000 0.06000 "PRO " "2HD " "    " 1 0 0 0 FFFFFF  H933  0 <> 1 0 0 0 0 0 0 <> <> 0 936 <> 0 0 1 <> <> <> <> <>
  937 41 35.338979 54.669576 20.526979 87 P A 21 0.06000 0.06000 "PRO " " HA " "    " 1 0 0 0 FFFFFF  H934  0 <> 1 0 0 0 0 0 0 <> <> 0 937 <> 0 0 1 <> <> <> <> <>
  938 41 38.196704 54.176053 21.383485 87 P A 21 0.06000 0.06000 "PRO " "1HB " "    " 1 0 0 0 FFFFFF  H935  0 <> 1 0 0 0 0 0 0 <> <> 0 938 <> 0 0 1 <> <> <> <> <>
  939 41 36.982175 55.171070 22.164772 87 P A 21 0.06000 0.06000 "PRO " "2HB " "    " 1 0 0 0 FFFFFF  H936  0 <> 1 0 0 0 0 0 0 <> <> 0 939 <> 0 0 1 <> <> <> <> <>
  940 41 35.944703 53.281513 23.145207 87 P A 21 0.06000 0.06000 "PRO " "1HG " "    " 1 0 0 0 FFFFFF  H937  0 <> 1 0 0 0 0 0 0 <> <> 0 940 <> 0 0 1 <> <> <> <> <>
  941 41 37.592978 52.686485 23.137949 87 P A 21 0.06000 0.06000 "PRO " "2HG " "    " 1 0 0 0 FFFFFF  H938  0 <> 1 0 0 0 0 0 0 <> <> 0 941 <> 0 0 1 <> <> <> <> <>
  942 25 36.567773 55.791753 18.638006 88 H A 43 -0.50000 -0.50000 "HIS " " N  " "    " 7 0 0 0 5757FF  N939  2 <> 1 0 0 0 0 0 0 <> <> 0 942 <> 0 0 1 <> <> <> <> <>
  943 3 37.198185 56.516182 17.539963 88 H A 2 0.14000 0.14000 "HIS " " CA " "    " 6 0 0 0 A0A0A0  C940  2 <> 1 0 0 0 0 0 0 <> <> 0 943 <> 0 0 1 <> <> <> <> <>
  944 2 37.067320 58.015540 17.787381 88 H A 2 0.50000 0.50000 "HIS " " C  " "    " 6 0 0 0 A0A0A0  C941  2 <> 1 0 0 0 0 0 0 <> <> 0 944 <> 0 0 1 <> <> <> <> <>
  945 15 36.339265 58.456454 18.679438 88 H A 70 -0.50000 -0.50000 "HIS " " O  " "    " 8 0 0 0 FF2F2F  O942  2 <> 1 0 0 0 0 0 0 <> <> 0 945 <> 0 0 1 <> <> <> <> <>
  946 3 36.686038 56.047901 16.158247 88 H A 2 -0.00500 -0.00500 "HIS " " CB " "    " 6 0 0 0 A0A0A0  C943  2 <> 1 0 0 0 0 0 0 <> <> 0 946 <> 0 0 1 <> <> <> <> <>
  947 2 35.230909 56.284124 15.840693 88 H A 2 0.01500 0.01500 "HIS " " CG " "    " 6 0 0 0 A0A0A0  C944  2 <> 1 0 0 0 0 0 0 <> <> 0 947 <> 0 0 1 <> <> <> <> <>
  948 2 34.133537 55.506235 16.118991 88 H A 2 -0.01500 -0.01500 "HIS " " CD2" "    " 6 0 0 0 A0A0A0  C945  2 <> 1 0 0 0 0 0 0 <> <> 0 948 <> 0 0 1 <> <> <> <> <>
  949 25 34.738207 57.389377 15.154950 88 H A 43 -0.57000 -0.57000 "HIS " " ND1" "    " 7 0 0 0 5757FF  N946  2 <> 1 0 0 0 0 0 0 <> <> 0 949 <> 0 0 1 <> <> <> <> <>
  950 2 33.417501 57.215984 15.014482 88 H A 2 0.29500 0.29500 "HIS " " CE1" "    " 6 0 0 0 A0A0A0  C947  2 <> 1 0 0 0 0 0 0 <> <> 0 950 <> 0 0 1 <> <> <> <> <>
  951 25 32.986887 56.112135 15.612300 88 H A 43 -0.49000 -0.49000 "HIS " " NE2" "    " 7 0 0 0 5757FF  N948  2 <> 1 0 0 0 0 0 0 <> <> 0 951 <> 0 0 1 <> <> <> <> <>
  952 43 35.788210 56.270266 19.073013 88 H A 21 0.30000 0.30000 "HIS " " H  " "    " 1 0 0 0 FFFFFF  H949  2 <> 1 0 0 0 0 0 0 <> <> 0 952 <> 0 0 1 <> <> <> <> <>
  953 41 38.270042 56.307108 17.572124 88 H A 21 0.06000 0.06000 "HIS " " HA " "    " 1 0 0 0 FFFFFF  H950  2 <> 1 0 0 0 0 0 0 <> <> 0 953 <> 0 0 1 <> <> <> <> <>
  954 41 37.297364 56.467482 15.358327 88 H A 21 0.06000 0.06000 "HIS " "1HB " "    " 1 0 0 0 FFFFFF  H951  2 <> 1 0 0 0 0 0 0 <> <> 0 954 <> 0 0 1 <> <> <> <> <>
  955 41 36.816922 54.973776 16.094018 88 H A 21 0.06000 0.06000 "HIS " "2HB " "    " 1 0 0 0 FFFFFF  H952  2 <> 1 0 0 0 0 0 0 <> <> 0 955 <> 0 0 1 <> <> <> <> <>
  956 41 34.085695 54.557540 16.632195 88 H A 21 0.11500 0.11500 "HIS " " HD2" "    " 1 0 0 0 FFFFFF  H953  2 <> 1 0 0 0 0 0 0 <> <> 0 956 <> 0 0 1 <> <> <> <> <>
  957 43 35.254829 58.150386 14.735005 88 H A 21 0.42000 0.42000 "HIS " " HD1" "    " 1 0 0 0 FFFFFF  H954  2 <> 1 0 0 0 0 0 0 <> <> 0 957 <> 0 0 1 <> <> <> <> <>
  958 41 32.763654 57.900773 14.488120 88 H A 21 0.11500 0.11500 "HIS " " HE1" "    " 1 0 0 0 FFFFFF  H955  2 <> 1 0 0 0 0 0 0 <> <> 0 958 <> 0 0 1 <> <> <> <> <>
  959 25 37.792555 58.800408 16.998090 89 S A 43 -0.50000 -0.50000 "SER " " N  " "    " 7 0 0 0 5757FF  N956  2 <> 1 0 0 0 0 0 0 <> <> 0 959 <> 0 0 1 <> <> <> <> <>
  960 3 37.729055 60.243897 16.968700 89 S A 2 0.14000 0.14000 "SER " " CA " "    " 6 0 0 0 A0A0A0  C957  2 <> 1 0 0 0 0 0 0 <> <> 0 960 <> 0 0 1 <> <> <> <> <>
  961 2 38.030506 60.610305 15.522517 89 S A 2 0.50000 0.50000 "SER " " C  " "    " 6 0 0 0 A0A0A0  C958  2 <> 1 0 0 0 0 0 0 <> <> 0 961 <> 0 0 1 <> <> <> <> <>
  962 15 39.186574 60.500220 15.117560 89 S A 70 -0.50000 -0.50000 "SER " " O  " "    " 8 0 0 0 FF2F2F  O959  2 <> 1 0 0 0 0 0 0 <> <> 0 962 <> 0 0 1 <> <> <> <> <>
  963 3 38.712805 60.815283 18.014415 89 S A 2 0.14500 0.14500 "SER " " CB " "    " 6 0 0 0 A0A0A0  C960  2 <> 1 0 0 0 0 0 0 <> <> 0 963 <> 0 0 1 <> <> <> <> <>
  964 16 38.683194 62.229236 18.073206 89 S A 70 -0.68300 -0.68300 "SER " " OG " "    " 8 0 0 0 FF2F2F  O961  2 <> 1 0 0 0 0 0 0 <> <> 0 964 <> 0 0 1 <> <> <> <> <>
  965 43 38.389520 58.386234 16.291911 89 S A 21 0.30000 0.30000 "SER " " H  " "    " 1 0 0 0 FFFFFF  H962  2 <> 1 0 0 0 0 0 0 <> <> 0 965 <> 0 0 1 <> <> <> <> <>
  966 41 36.717219 60.576183 17.206486 89 S A 21 0.06000 0.06000 "SER " " HA " "    " 1 0 0 0 FFFFFF  H963  2 <> 1 0 0 0 0 0 0 <> <> 0 966 <> 0 0 1 <> <> <> <> <>
  967 41 38.479564 60.423566 19.004784 89 S A 21 0.06000 0.06000 "SER " "1HB " "    " 1 0 0 0 FFFFFF  H964  2 <> 1 0 0 0 0 0 0 <> <> 0 967 <> 0 0 1 <> <> <> <> <>
  968 41 39.731144 60.494864 17.793868 89 S A 21 0.06000 0.06000 "SER " "2HB " "    " 1 0 0 0 FFFFFF  H965  2 <> 1 0 0 0 0 0 0 <> <> 0 968 <> 0 0 1 <> <> <> <> <>
  969 42 38.776847 62.487422 18.996289 89 S A 21 0.41800 0.41800 "SER " " HG " "    " 1 0 0 0 FFFFFF  H966  2 <> 1 0 0 0 0 0 0 <> <> 0 969 <> 0 0 1 <> <> <> <> <>
  970 25 37.017326 60.997100 14.740086 90 H A 43 -0.50000 -0.50000 "HIS " " N  " "    " 7 0 0 1 5757FF  N967  2 <> 1 0 0 0 0 0 0 <> <> 0 970 <> 0 0 1 <> <> <> <> <>
  971 3 37.219558 61.514328 13.393333 90 H A 2 0.14000 0.14000 "HIS " " CA " "    " 6 0 0 1 A0A0A0  C968  2 <> 1 0 0 0 0 0 0 <> <> 0 971 <> 0 0 1 <> <> <> <> <>
  972 2 37.693459 62.970914 13.545837 90 H A 2 0.50000 0.50000 "HIS " " C  " "    " 6 0 0 1 A0A0A0  C969  2 <> 1 0 0 0 0 0 0 <> <> 0 972 <> 0 0 1 <> <> <> <> <>
  973 15 37.142228 63.731871 14.345467 90 H A 70 -0.50000 -0.50000 "HIS " " O  " "    " 8 0 0 1 FF2F2F  O970  2 <> 1 0 0 0 0 0 0 <> <> 0 973 <> 0 0 1 <> <> <> <> <>
  974 3 35.890629 61.406559 12.587701 90 H A 2 -0.41471 -0.41471 "HIS " " CB " "    " 6 0 0 1 A0A0A0  C971  2 <> 1 0 0 0 0 0 0 -0.414705938878607 <> 0 974 <> 0 0 1 <> <> <> <> <>
  975 2 35.904127 61.845361 11.144077 90 H A 2 0.24993 0.24993 "HIS " " CG " "    " 6 0 0 1 A0A0A0  C972  2 <> 1 0 0 0 0 0 0 0.249934278760021 <> 0 975 <> 0 0 1 <> <> <> <> <>
  976 2 34.834752 62.288322 10.384794 90 H A 2 -0.17618 -0.17618 "HIS " " CD2" "    " 6 0 0 1 A0A0A0  C973  2 <> 1 0 0 0 0 0 0 -0.176184182235132 <> 0 976 <> 0 0 1 <> <> <> <> <>
  977 25 37.020661 61.989637 10.317191 90 H A 43 -0.46496 -0.46496 "HIS " " ND1" "    " 7 0 0 1 5757FF  N974  2 <> 1 0 0 0 0 0 0 -0.464958369116117 <> 0 977 <> 0 0 1 <> <> <> <> <>
  978 2 36.595957 62.538498 9.142047 90 H A 2 0.08601 0.08601 "HIS " " CE1" "    " 6 0 0 1 A0A0A0  C975  2 <> 1 0 0 0 0 0 0 0.0860106593360199 <> 0 978 <> 0 0 1 <> <> <> <> <>
  979 25 35.271014 62.716901 9.144031 90 H A 43 -0.23882 -0.23882 "HIS " " NE2" "    " 7 0 0 1 5757FF  N976  2 <> 1 0 0 0 0 0 0 -0.238816664093435 <> 0 979 <> 0 0 1 <> <> <> <> <>
  980 43 36.103210 61.157031 15.142723 90 H A 21 0.30000 0.30000 "HIS " " H  " "    " 1 0 0 1 FFFFFF  H977  2 <> 1 0 0 0 0 0 0 <> <> 0 980 <> 0 0 1 <> <> <> <> <>
  981 41 37.983340 60.914261 12.892627 90 H A 21 0.06000 0.06000 "HIS " " HA " "    " 1 0 0 0 FFFFFF  H978  2 <> 1 0 0 0 0 0 0 <> <> 0 981 <> 0 0 1 <> <> <> <> <>
  982 41 35.610494 60.333862 12.666875 90 H A 21 0.07496 0.07496 "HIS " "1HB " "    " 1 0 0 0 FFFFFF  H979  2 <> 1 0 0 0 0 0 0 0.0749577922753656 <> 0 982 <> 0 0 1 <> <> <> <> <>
  983 41 35.078533 61.976851 13.081727 90 H A 21 0.19277 0.19277 "HIS " "2HB " "    " 1 0 0 0 FFFFFF  H980  2 <> 1 0 0 0 0 0 0 0.192767795730378 <> 0 983 <> 0 0 1 <> <> <> <> <>
  984 41 33.790215 62.361212 10.677279 90 H A 21 0.12323 0.12323 "HIS " " HD2" "    " 1 0 0 0 FFFFFF  H981  2 <> 1 0 0 0 0 0 0 0.123229779135199 <> 0 984 <> 0 0 1 <> <> <> <> <>
  985 43 38.017897 61.764356 10.565794 90 H A 21 0.45690 0.45690 "HIS " " HD1" "    " 1 0 0 1 FFFFFF  H982  2 <> 1 0 0 0 0 0 0 0.456898428155731 <> 0 985 <> 0 0 1 <> <> <> <> <>
  986 41 37.275947 62.840363 8.347136 90 H A 21 0.11390 0.11390 "HIS " " HE1" "    " 1 0 0 0 FFFFFF  H983  2 <> 1 0 0 0 0 0 0 0.113902842079365 <> 0 986 <> 0 0 1 <> <> <> <> <>
  987 25 38.804422 63.303594 12.889264 91 N A 43 -0.50000 -0.50000 "ASN " " N  " "    " 7 0 0 1 5757FF  N984  0 <> 1 0 0 0 0 0 0 <> <> 0 987 <> 0 0 1 <> <> <> <> <>
  988 3 39.506950 64.574814 12.996392 91 N A 2 0.14000 0.14000 "ASN " " CA " "    " 6 0 0 1 A0A0A0  C985  0 <> 1 0 0 0 0 0 0 <> <> 0 988 <> 0 0 1 <> <> <> <> <>
  989 2 39.740662 65.076893 11.582024 91 N A 2 0.50000 0.50000 "ASN " " C  " "    " 6 0 0 1 A0A0A0  C986  0 <> 1 0 0 0 0 0 0 <> <> 0 989 <> 0 0 1 <> <> <> <> <>
  990 15 40.803505 64.837168 11.017642 91 N A 70 -0.50000 -0.50000 "ASN " " O  " "    " 8 0 0 1 FF2F2F  O987  0 <> 1 0 0 0 0 0 0 <> <> 0 990 <> 0 0 1 <> <> <> <> <>
  991 3 40.814961 64.430251 13.811087 91 N A 2 -0.12000 -0.12000 "ASN " " CB " "    " 6 0 0 1 A0A0A0  C988  0 <> 1 0 0 0 0 0 0 <> <> 0 991 <> 0 0 1 <> <> <> <> <>
  992 2 40.572555 64.331298 15.313613 91 N A 2 0.50000 0.50000 "ASN " " CG " "    " 6 0 0 1 A0A0A0  C989  0 <> 1 0 0 0 0 0 0 <> <> 0 992 <> 0 0 1 <> <> <> <> <>
  993 15 40.830181 65.274274 16.057905 91 N A 70 -0.50000 -0.50000 "ASN " " OD1" "    " 8 0 0 1 FF2F2F  O990  0 <> 1 0 0 0 0 0 0 <> <> 0 993 <> 0 0 1 <> <> <> <> <>
  994 25 40.140410 63.173381 15.790548 91 N A 43 -0.76000 -0.76000 "ASN " " ND2" "    " 7 0 0 1 5757FF  N991  0 <> 1 0 0 0 0 0 0 <> <> 0 994 <> 0 0 1 <> <> <> <> <>
  995 43 39.198517 62.614879 12.231902 91 N A 21 0.30000 0.30000 "ASN " " H  " "    " 1 0 0 1 FFFFFF  H992  0 <> 1 0 0 0 0 0 0 <> <> 0 995 <> 0 0 1 <> <> <> <> <>
  996 41 38.877946 65.315579 13.493048 91 N A 21 0.06000 0.06000 "ASN " " HA " "    " 1 0 0 0 FFFFFF  H993  0 <> 1 0 0 0 0 0 0 <> <> 0 996 <> 0 0 1 <> <> <> <> <>
  997 41 41.387480 63.567521 13.466081 91 N A 21 0.06000 0.06000 "ASN " "1HB " "    " 1 0 0 0 FFFFFF  H994  0 <> 1 0 0 0 0 0 0 <> <> 0 997 <> 0 0 1 <> <> <> <> <>
  998 41 41.449357 65.301124 13.634740 91 N A 21 0.06000 0.06000 "ASN " "2HB " "    " 1 0 0 0 FFFFFF  H995  0 <> 1 0 0 0 0 0 0 <> <> 0 998 <> 0 0 1 <> <> <> <> <>
  999 43 39.809661 63.072993 16.743834 91 N A 21 0.38000 0.38000 "ASN " "1HD2" "    " 1 0 0 1 FFFFFF  H996  0 <> 1 0 0 0 0 0 0 <> <> 0 999 <> 0 0 1 <> <> <> <> <>
  1000 43 39.973242 62.399050 15.150163 91 N A 21 0.38000 0.38000 "ASN " "2HD2" "    " 1 0 0 1 FFFFFF  H997  0 <> 1 0 0 0 0 0 0 <> <> 0 1000 <> 0 0 1 <> <> <> <> <>
  1001 25 38.722300 65.732918 11.018385 92 D A 43 -0.50000 -0.50000 "ASP " " N  " "    " 7 0 0 1 5757FF  N998  0 <> 1 0 0 0 0 0 0 <> <> 0 1001 <> 0 0 1 <> <> <> <> <>
  1002 3 38.637642 66.294091 9.669651 92 D A 2 0.14000 0.14000 "ASP " " CA " "    " 6 0 0 1 A0A0A0  C999  0 <> 1 0 0 0 0 0 0 <> <> 0 1002 <> 0 0 1 <> <> <> <> <>
  1003 2 39.849474 67.180487 9.284698 92 D A 2 0.50000 0.50000 "ASP " " C  " "    " 6 0 0 1 A0A0A0  C1000  0 <> 1 0 0 0 0 0 0 <> <> 0 1003 <> 0 0 1 <> <> <> <> <>
  1004 15 40.003844 68.244188 9.892356 92 D A 70 -0.50000 -0.50000 "ASP " " O  " "    " 8 0 0 1 FF2F2F  O1001  0 <> 1 0 0 0 0 0 0 <> <> 0 1004 <> 0 0 1 <> <> <> <> <>
  1005 3 37.319100 67.114258 9.552057 92 D A 2 -0.48635 -0.48635 "ASP " " CB " "    " 6 0 0 1 A0A0A0  C1002  0 <> 1 0 0 0 0 0 0 -0.48634573306877 <> 0 1005 <> 0 0 1 <> <> <> <> <>
  1006 2 36.046407 66.239459 9.666863 92 D A 2 0.87008 0.87008 "ASP " " CG " "    " 6 0 0 1 A0A0A0  C1003  0 <> 1 0 0 0 0 0 0 0.870075129403982 <> 0 1006 <> 0 0 1 <> <> <> <> <>
  1007 18 35.787917 65.538746 8.633018 92 D A 70 -0.73365 -0.73365 "ASP " " OD1" "    " 8 -1 0 1 FF2F2F  O1004  0 <> 1 0 0 0 0 0 0 -0.733649226395128 <> 0 1007 <> 0 0 1 <> <> <> <> <>
  1008 15 35.393463 66.301460 10.761760 92 D A 70 -0.70083 -0.70083 "ASP " " OD2" "    " 8 0 0 1 FF2F2F  O1005  0 <> 1 0 0 0 0 0 0 -0.700826811079953 <> 0 1008 <> 0 0 1 <> <> <> <> <>
  1009 43 37.892040 65.842344 11.583629 92 D A 21 0.30000 0.30000 "ASP " " H  " "    " 1 0 0 1 FFFFFF  H1006  0 <> 1 0 0 0 0 0 0 <> <> 0 1009 <> 0 0 1 <> <> <> <> <>
  1010 41 38.541486 65.451249 8.985616 92 D A 21 0.06000 0.06000 "ASP " " HA " "    " 1 0 0 0 FFFFFF  H1007  0 <> 1 0 0 0 0 0 0 <> <> 0 1010 <> 0 0 1 <> <> <> <> <>
  1011 41 37.325077 67.881218 10.345079 92 D A 21 0.09015 0.09015 "ASP " "1HB " "    " 1 0 0 0 FFFFFF  H1008  0 <> 1 0 0 0 0 0 0 0.0901488479542429 <> 0 1011 <> 0 0 1 <> <> <> <> <>
  1012 41 37.287800 67.627281 8.577584 92 D A 21 0.10253 0.10253 "ASP " "2HB " "    " 1 0 0 0 FFFFFF  H1009  0 <> 1 0 0 0 0 0 0 0.102533020773236 <> 0 1012 <> 0 0 1 <> <> <> <> <>
  1013 25 40.709573 66.772589 8.315104 93 P A 43 -0.14000 -0.14000 "PRO " " N  " "    " 7 0 0 1 5757FF  N1010  0 <> 1 0 0 0 0 0 0 <> <> 0 1013 <> 0 0 1 <> <> <> <> <>
  1014 3 41.827574 67.537514 7.704648 93 P A 2 0.01000 0.01000 "PRO " " CA " "    " 6 0 0 1 A0A0A0  C1011  0 <> 1 0 0 0 0 0 0 <> <> 0 1014 <> 0 0 1 <> <> <> <> <>
  1015 2 41.573164 68.973926 7.176197 93 P A 2 0.50000 0.50000 "PRO " " C  " "    " 6 0 0 1 A0A0A0  C1012  0 <> 1 0 0 0 0 0 0 <> <> 0 1015 <> 0 0 1 <> <> <> <> <>
  1016 15 42.204093 69.372474 6.195132 93 P A 70 -0.50000 -0.50000 "PRO " " O  " "    " 8 0 0 1 FF2F2F  O1013  0 <> 1 0 0 0 0 0 0 <> <> 0 1016 <> 0 0 1 <> <> <> <> <>
  1017 3 40.736245 65.389433 7.823687 93 P A 2 -0.05000 -0.05000 "PRO " " CD " "    " 6 0 0 1 A0A0A0  C1014  0 <> 1 0 0 0 0 0 0 <> <> 0 1017 <> 0 0 1 <> <> <> <> <>
  1018 3 42.307019 66.646224 6.542697 93 P A 2 -0.12000 -0.12000 "PRO " " CB " "    " 6 0 0 1 A0A0A0  C1015  0 <> 1 0 0 0 0 0 0 <> <> 0 1018 <> 0 0 1 <> <> <> <> <>
  1019 3 41.979874 65.235605 6.970062 93 P A 2 -0.12000 -0.12000 "PRO " " CG " "    " 6 0 0 1 A0A0A0  C1016  0 <> 1 0 0 0 0 0 0 <> <> 0 1019 <> 0 0 1 <> <> <> <> <>
  1020 41 40.730579 64.645931 8.615057 93 P A 21 0.06000 0.06000 "PRO " "1HD " "    " 1 0 0 0 FFFFFF  H1017  0 <> 1 0 0 0 0 0 0 <> <> 0 1020 <> 0 0 1 <> <> <> <> <>
  1021 41 39.860072 65.208243 7.214305 93 P A 21 0.06000 0.06000 "PRO " "2HD " "    " 1 0 0 0 FFFFFF  H1018  0 <> 1 0 0 0 0 0 0 <> <> 0 1021 <> 0 0 1 <> <> <> <> <>
  1022 41 42.620630 67.603773 8.447319 93 P A 21 0.06000 0.06000 "PRO " " HA " "    " 1 0 0 0 FFFFFF  H1019  0 <> 1 0 0 0 0 0 0 <> <> 0 1022 <> 0 0 1 <> <> <> <> <>
  1023 41 41.751459 66.867140 5.628539 93 P A 21 0.06000 0.06000 "PRO " "1HB " "    " 1 0 0 0 FFFFFF  H1020  0 <> 1 0 0 0 0 0 0 <> <> 0 1023 <> 0 0 1 <> <> <> <> <>
  1024 41 43.363048 66.781464 6.321305 93 P A 21 0.06000 0.06000 "PRO " "2HB " "    " 1 0 0 0 FFFFFF  H1021  0 <> 1 0 0 0 0 0 0 <> <> 0 1024 <> 0 0 1 <> <> <> <> <>
  1025 41 42.797186 64.830863 7.569698 93 P A 21 0.06000 0.06000 "PRO " "1HG " "    " 1 0 0 0 FFFFFF  H1022  0 <> 1 0 0 0 0 0 0 <> <> 0 1025 <> 0 0 1 <> <> <> <> <>
  1026 41 41.796372 64.567617 6.132336 93 P A 21 0.06000 0.06000 "PRO " "2HG " "    " 1 0 0 0 FFFFFF  H1023  0 <> 1 0 0 0 0 0 0 <> <> 0 1026 <> 0 0 1 <> <> <> <> <>
  1027 25 40.660589 69.749201 7.759744 94 G A 43 -0.50000 -0.50000 "GLY " " N  " "    " 7 0 0 1 5757FF  N1024  0 <> 1 0 0 0 0 0 0 <> <> 0 1027 <> 0 0 1 <> <> <> <> <>
  1028 3 40.166761 71.028360 7.267975 94 G A 2 0.08000 0.08000 "GLY " " CA " "    " 6 0 0 1 A0A0A0  C1025  0 <> 1 0 0 0 0 0 0 <> <> 0 1028 <> 0 0 1 <> <> <> <> <>
  1029 2 38.669714 70.901400 6.985113 94 G A 2 0.50000 0.50000 "GLY " " C  " "    " 6 0 0 1 A0A0A0  C1026  0 <> 1 0 0 0 0 0 0 <> <> 0 1029 <> 0 0 1 <> <> <> <> <>
  1030 15 38.265421 69.974805 6.289022 94 G A 70 -0.50000 -0.50000 "GLY " " O  " "    " 8 0 0 1 FF2F2F  O1027  0 <> 1 0 0 0 0 0 0 <> <> 0 1030 <> 0 0 1 <> <> <> <> <>
  1031 43 40.209880 69.361578 8.588255 94 G A 21 0.30000 0.30000 "GLY " " H  " "    " 1 0 0 1 FFFFFF  H1028  0 <> 1 0 0 0 0 0 0 <> <> 0 1031 <> 0 0 1 <> <> <> <> <>
  1032 41 40.365428 71.799393 8.009277 94 G A 21 0.06000 0.06000 "GLY " "1HA " "    " 1 0 0 0 FFFFFF  H1029  0 <> 1 0 0 0 0 0 0 <> <> 0 1032 <> 0 0 1 <> <> <> <> <>
  1033 41 40.667321 71.335557 6.348722 94 G A 21 0.06000 0.06000 "GLY " "2HA " "    " 1 0 0 0 FFFFFF  H1030  0 <> 1 0 0 0 0 0 0 <> <> 0 1033 <> 0 0 1 <> <> <> <> <>
  1034 25 37.856655 71.822006 7.519765 95 W A 43 -0.50000 -0.50000 "TRP " " N  " "    " 7 0 0 1 5757FF  N1031  0 <> 1 0 0 0 0 0 0 <> <> 0 1034 <> 0 0 1 <> <> <> <> <>
  1035 3 36.402771 71.888560 7.354248 95 W A 2 0.14000 0.14000 "TRP " " CA " "    " 6 0 0 1 A0A0A0  C1032  0 <> 1 0 0 0 0 0 0 <> <> 0 1035 <> 0 0 1 <> <> <> <> <>
  1036 2 35.905099 73.312657 7.665853 95 W A 2 0.50000 0.50000 "TRP " " C  " "    " 6 0 0 1 A0A0A0  C1033  0 <> 1 0 0 0 0 0 0 <> <> 0 1036 <> 0 0 1 <> <> <> <> <>
  1037 15 35.736121 74.112979 6.744196 95 W A 70 -0.50000 -0.50000 "TRP " " O  " "    " 8 0 0 1 FF2F2F  O1034  0 <> 1 0 0 0 0 0 0 <> <> 0 1037 <> 0 0 1 <> <> <> <> <>
  1038 3 35.669733 70.716359 8.079691 95 W A 2 -0.10574 -0.10574 "TRP " " CB " "    " 6 0 0 1 A0A0A0  C1035  0 <> 1 0 0 0 0 0 0 -0.105741192879893 <> 0 1038 <> 0 0 1 <> <> <> <> <>
  1039 2 34.158033 70.784071 8.099239 95 W A 2 -0.24251 -0.24251 "TRP " " CG " "    " 6 0 0 1 A0A0A0  C1036  0 <> 1 0 0 0 0 0 0 -0.242508200097843 <> 0 1039 <> 0 0 1 <> <> <> <> <>
  1040 2 33.304945 70.492453 9.225656 95 W A 2 0.18386 0.18386 "TRP " " CD2" "    " 6 0 0 1 A0A0A0  C1037  0 <> 1 0 0 0 0 0 0 0.183859411644289 <> 0 1040 <> 0 0 1 <> <> <> <> <>
  1041 2 31.944181 70.671229 8.789687 95 W A 2 0.19067 0.19067 "TRP " " CE2" "    " 6 0 0 1 A0A0A0  C1038  0 <> 1 0 0 0 0 0 0 0.190667902260623 <> 0 1041 <> 0 0 1 <> <> <> <> <>
  1042 2 33.544929 70.063243 10.553601 95 W A 2 -0.37838 -0.37838 "TRP " " CE3" "    " 6 0 0 1 A0A0A0  C1039  0 <> 1 0 0 0 0 0 0 -0.378380309642075 <> 0 1042 <> 0 0 1 <> <> <> <> <>
  1043 2 33.305781 71.083473 7.046922 95 W A 2 -0.05996 -0.05996 "TRP " " CD1" "    " 6 0 0 1 A0A0A0  C1040  0 <> 1 0 0 0 0 0 0 -0.059959353695633 <> 0 1043 <> 0 0 1 <> <> <> <> <>
  1044 25 31.984265 71.055801 7.458715 95 W A 43 -0.43118 -0.43118 "TRP " " NE1" "    " 7 0 0 1 5757FF  N1041  0 <> 1 0 0 0 0 0 0 -0.431179083561378 <> 0 1044 <> 0 0 1 <> <> <> <> <>
  1045 2 30.850476 70.476888 9.651581 95 W A 2 -0.21586 -0.21586 "TRP " " CZ2" "    " 6 0 0 1 A0A0A0  C1042  0 <> 1 0 0 0 0 0 0 -0.21586489869519 <> 0 1045 <> 0 0 1 <> <> <> <> <>
  1046 2 32.455035 69.856581 11.408440 95 W A 2 -0.14723 -0.14723 "TRP " " CZ3" "    " 6 0 0 1 A0A0A0  C1043  0 <> 1 0 0 0 0 0 0 -0.147228575263919 <> 0 1046 <> 0 0 1 <> <> <> <> <>
  1047 2 31.124696 70.076319 10.965863 95 W A 2 -0.16283 -0.16283 "TRP " " CH2" "    " 6 0 0 1 A0A0A0  C1044  0 <> 1 0 0 0 0 0 0 -0.162827911891663 <> 0 1047 <> 0 0 1 <> <> <> <> <>
  1048 43 38.295991 72.595101 8.000788 95 W A 21 0.30000 0.30000 "TRP " " H  " "    " 1 0 0 1 FFFFFF  H1045  0 <> 1 0 0 0 0 0 0 <> <> 0 1048 <> 0 0 1 <> <> <> <> <>
  1049 41 36.206886 71.750037 6.287191 95 W A 21 0.06000 0.06000 "TRP " " HA " "    " 1 0 0 0 FFFFFF  H1046  0 <> 1 0 0 0 0 0 0 <> <> 0 1049 <> 0 0 1 <> <> <> <> <>
  1050 41 35.979275 69.781075 7.578757 95 W A 21 0.16081 0.16081 "TRP " "1HB " "    " 1 0 0 0 FFFFFF  H1047  0 <> 1 0 0 0 0 0 0 0.160809074540343 <> 0 1050 <> 0 0 1 <> <> <> <> <>
  1051 41 36.066004 70.667074 9.112018 95 W A 21 0.01787 0.01787 "TRP " "2HB " "    " 1 0 0 0 FFFFFF  H1048  0 <> 1 0 0 0 0 0 0 0.0178732092549295 <> 0 1051 <> 0 0 1 <> <> <> <> <>
  1052 41 34.562665 69.798253 10.874970 95 W A 21 0.15442 0.15442 "TRP " " HE3" "    " 1 0 0 0 FFFFFF  H1049  0 <> 1 0 0 0 0 0 0 0.154418360986661 <> 0 1052 <> 0 0 1 <> <> <> <> <>
  1053 41 33.526688 71.306668 6.003120 95 W A 21 0.14721 0.14721 "TRP " " HD1" "    " 1 0 0 0 FFFFFF  H1050  0 <> 1 0 0 0 0 0 0 0.147214480674562 <> 0 1053 <> 0 0 1 <> <> <> <> <>
  1054 43 31.244123 70.929811 6.754534 95 W A 21 0.37615 0.37615 "TRP " " HE1" "    " 1 0 0 1 FFFFFF  H1051  0 <> 1 0 0 0 0 0 0 0.376145864014122 <> 0 1054 <> 0 0 1 <> <> <> <> <>
  1055 41 29.821569 70.633067 9.312427 95 W A 21 0.18153 0.18153 "TRP " " HZ2" "    " 1 0 0 0 FFFFFF  H1052  0 <> 1 0 0 0 0 0 0 0.181534491393805 <> 0 1055 <> 0 0 1 <> <> <> <> <>
  1056 41 32.623508 69.478792 12.424325 95 W A 21 0.10569 0.10569 "TRP " " HZ3" "    " 1 0 0 0 FFFFFF  H1053  0 <> 1 0 0 0 0 0 0 0.105687940367008 <> 0 1056 <> 0 0 1 <> <> <> <> <>
  1057 41 30.290377 69.896776 11.651790 95 W A 21 0.13413 0.13413 "TRP " " HH2" "    " 1 0 0 0 FFFFFF  H1054  0 <> 1 0 0 0 0 0 0 0.134132810827866 <> 0 1057 <> 0 0 1 <> <> <> <> <>
  1058 25 35.719002 73.669660 8.946963 96 I A 43 -0.50000 -0.50000 "ILE " " N  " "    " 7 0 0 1 5757FF  N1055  0 <> 1 0 0 0 0 0 0 <> <> 0 1058 <> 0 0 1 <> <> <> <> <>
  1059 3 35.330558 75.024969 9.363065 96 I A 2 0.14000 0.14000 "ILE " " CA " "    " 6 0 0 1 A0A0A0  C1056  0 <> 1 0 0 0 0 0 0 <> <> 0 1059 <> 0 0 1 <> <> <> <> <>
  1060 2 36.592224 75.878698 9.603734 96 I A 2 0.50000 0.50000 "ILE " " C  " "    " 6 0 0 1 A0A0A0  C1057  0 <> 1 0 0 0 0 0 0 <> <> 0 1060 <> 0 0 1 <> <> <> <> <>
  1061 15 36.599489 77.072269 9.309897 96 I A 70 -0.50000 -0.50000 "ILE " " O  " "    " 8 0 0 1 FF2F2F  O1058  0 <> 1 0 0 0 0 0 0 <> <> 0 1061 <> 0 0 1 <> <> <> <> <>
  1062 3 34.488071 74.968161 10.676785 96 I A 2 -0.06000 -0.06000 "ILE " " CB " "    " 6 0 0 1 A0A0A0  C1059  0 <> 1 0 0 0 0 0 0 <> <> 0 1062 <> 0 0 1 <> <> <> <> <>
  1063 3 34.034533 76.354723 11.183140 96 I A 2 -0.18000 -0.18000 "ILE " " CG2" "    " 6 0 0 1 A0A0A0  C1060  0 <> 1 0 0 0 0 0 0 <> <> 0 1063 <> 0 0 1 <> <> <> <> <>
  1064 3 33.265952 74.026485 10.580612 96 I A 2 -0.12000 -0.12000 "ILE " " CG1" "    " 6 0 0 1 A0A0A0  C1061  0 <> 1 0 0 0 0 0 0 <> <> 0 1064 <> 0 0 1 <> <> <> <> <>
  1065 3 32.252802 74.379920 9.481875 96 I A 2 -0.18000 -0.18000 "ILE " " CD1" "    " 6 0 0 1 A0A0A0  C1062  0 <> 1 0 0 0 0 0 0 <> <> 0 1065 <> 0 0 1 <> <> <> <> <>
  1066 43 35.760261 72.942740 9.651822 96 I A 21 0.30000 0.30000 "ILE " " H  " "    " 1 0 0 1 FFFFFF  H1063  0 <> 1 0 0 0 0 0 0 <> <> 0 1066 <> 0 0 1 <> <> <> <> <>
  1067 41 34.739408 75.501119 8.583820 96 I A 21 0.06000 0.06000 "ILE " " HA " "    " 1 0 0 0 FFFFFF  H1064  0 <> 1 0 0 0 0 0 0 <> <> 0 1067 <> 0 0 1 <> <> <> <> <>
  1068 41 35.123510 74.559751 11.462300 96 I A 21 0.06000 0.06000 "ILE " " HB " "    " 1 0 0 0 FFFFFF  H1065  0 <> 1 0 0 0 0 0 0 <> <> 0 1068 <> 0 0 1 <> <> <> <> <>
  1069 41 33.388723 76.263170 12.056733 96 I A 21 0.06000 0.06000 "ILE " "1HG2" "    " 1 0 0 0 FFFFFF  H1066  0 <> 1 0 0 0 0 0 0 <> <> 0 1069 <> 0 0 1 <> <> <> <> <>
  1070 41 34.876874 76.981042 11.477316 96 I A 21 0.06000 0.06000 "ILE " "2HG2" "    " 1 0 0 0 FFFFFF  H1067  0 <> 1 0 0 0 0 0 0 <> <> 0 1070 <> 0 0 1 <> <> <> <> <>
  1071 41 33.479820 76.890844 10.415267 96 I A 21 0.06000 0.06000 "ILE " "3HG2" "    " 1 0 0 0 FFFFFF  H1068  0 <> 1 0 0 0 0 0 0 <> <> 0 1071 <> 0 0 1 <> <> <> <> <>
  1072 41 33.605797 73.005935 10.422536 96 I A 21 0.06000 0.06000 "ILE " "1HG1" "    " 1 0 0 0 FFFFFF  H1069  0 <> 1 0 0 0 0 0 0 <> <> 0 1072 <> 0 0 1 <> <> <> <> <>
  1073 41 32.746175 73.998950 11.538830 96 I A 21 0.06000 0.06000 "ILE " "2HG1" "    " 1 0 0 0 FFFFFF  H1070  0 <> 1 0 0 0 0 0 0 <> <> 0 1073 <> 0 0 1 <> <> <> <> <>
  1074 41 31.410054 73.687342 9.509886 96 I A 21 0.06000 0.06000 "ILE " "1HD1" "    " 1 0 0 0 FFFFFF  H1071  0 <> 1 0 0 0 0 0 0 <> <> 0 1074 <> 0 0 1 <> <> <> <> <>
  1075 41 31.846797 75.383098 9.599980 96 I A 21 0.06000 0.06000 "ILE " "2HD1" "    " 1 0 0 0 FFFFFF  H1072  0 <> 1 0 0 0 0 0 0 <> <> 0 1075 <> 0 0 1 <> <> <> <> <>
  1076 41 32.696143 74.299428 8.489993 96 I A 21 0.06000 0.06000 "ILE " "3HD1" "    " 1 0 0 0 FFFFFF  H1073  0 <> 1 0 0 0 0 0 0 <> <> 0 1076 <> 0 0 1 <> <> <> <> <>
  1077 25 37.645251 75.266399 10.153846 97 Q A 43 -0.50000 -0.50000 "GLN " " N  " "    " 7 0 0 0 5757FF  N1074  0 <> 1 0 0 0 0 0 0 <> <> 0 1077 <> 0 0 1 <> <> <> <> <>
  1078 3 38.944724 75.864722 10.452047 97 Q A 2 0.14000 0.14000 "GLN " " CA " "    " 6 0 0 0 A0A0A0  C1075  0 <> 1 0 0 0 0 0 0 <> <> 0 1078 <> 0 0 1 <> <> <> <> <>
  1079 2 39.998168 75.223649 9.533399 97 Q A 2 0.50000 0.50000 "GLN " " C  " "    " 6 0 0 0 A0A0A0  C1076  0 <> 1 0 0 0 0 0 0 <> <> 0 1079 <> 0 0 1 <> <> <> <> <>
  1080 15 39.736923 74.178227 8.928907 97 Q A 70 -0.50000 -0.50000 "GLN " " O  " "    " 8 0 0 0 FF2F2F  O1077  0 <> 1 0 0 0 0 0 0 <> <> 0 1080 <> 0 0 1 <> <> <> <> <>
  1081 3 39.270003 75.584661 11.933810 97 Q A 2 -0.12000 -0.12000 "GLN " " CB " "    " 6 0 0 0 A0A0A0  C1078  0 <> 1 0 0 0 0 0 0 <> <> 0 1081 <> 0 0 1 <> <> <> <> <>
  1082 3 38.328444 76.327979 12.912137 97 Q A 2 -0.12000 -0.12000 "GLN " " CG " "    " 6 0 0 0 A0A0A0  C1079  0 <> 1 0 0 0 0 0 0 <> <> 0 1082 <> 0 0 1 <> <> <> <> <>
  1083 2 37.851023 75.467330 14.081123 97 Q A 2 0.50000 0.50000 "GLN " " CD " "    " 6 0 0 0 A0A0A0  C1080  0 <> 1 0 0 0 0 0 0 <> <> 0 1083 <> 0 0 1 <> <> <> <> <>
  1084 15 38.135299 75.762341 15.240491 97 Q A 70 -0.50000 -0.50000 "GLN " " OE1" "    " 8 0 0 0 FF2F2F  O1081  0 <> 1 0 0 0 0 0 0 <> <> 0 1084 <> 0 0 1 <> <> <> <> <>
  1085 25 37.134360 74.387076 13.812783 97 Q A 43 -0.76000 -0.76000 "GLN " " NE2" "    " 7 0 0 0 5757FF  N1082  0 <> 1 0 0 0 0 0 0 <> <> 0 1085 <> 0 0 1 <> <> <> <> <>
  1086 43 37.593261 74.262179 10.223455 97 Q A 21 0.30000 0.30000 "GLN " " H  " "    " 1 0 0 0 FFFFFF  H1083  0 <> 1 0 0 0 0 0 0 <> <> 0 1086 <> 0 0 1 <> <> <> <> <>
  1087 41 38.940919 76.941971 10.269639 97 Q A 21 0.06000 0.06000 "GLN " " HA " "    " 1 0 0 0 FFFFFF  H1084  0 <> 1 0 0 0 0 0 0 <> <> 0 1087 <> 0 0 1 <> <> <> <> <>
  1088 41 39.272205 74.508900 12.114303 97 Q A 21 0.06000 0.06000 "GLN " "1HB " "    " 1 0 0 0 FFFFFF  H1085  0 <> 1 0 0 0 0 0 0 <> <> 0 1088 <> 0 0 1 <> <> <> <> <>
  1089 41 40.290767 75.907272 12.138722 97 Q A 21 0.06000 0.06000 "GLN " "2HB " "    " 1 0 0 0 FFFFFF  H1086  0 <> 1 0 0 0 0 0 0 <> <> 0 1089 <> 0 0 1 <> <> <> <> <>
  1090 41 38.818398 77.229205 13.277082 97 Q A 21 0.06000 0.06000 "GLN " "1HG " "    " 1 0 0 0 FFFFFF  H1087  0 <> 1 0 0 0 0 0 0 <> <> 0 1090 <> 0 0 1 <> <> <> <> <>
  1091 41 37.436511 76.685723 12.396823 97 Q A 21 0.06000 0.06000 "GLN " "2HG " "    " 1 0 0 0 FFFFFF  H1088  0 <> 1 0 0 0 0 0 0 <> <> 0 1091 <> 0 0 1 <> <> <> <> <>
  1092 43 36.831047 73.797789 14.570616 97 Q A 21 0.38000 0.38000 "GLN " "1HE2" "    " 1 0 0 0 FFFFFF  H1089  0 <> 1 0 0 0 0 0 0 <> <> 0 1092 <> 0 0 1 <> <> <> <> <>
  1093 43 36.934731 74.107305 12.859909 97 Q A 21 0.38000 0.38000 "GLN " "2HE2" "    " 1 0 0 0 FFFFFF  H1090  0 <> 1 0 0 0 0 0 0 <> <> 0 1093 <> 0 0 1 <> <> <> <> <>
  1094 25 41.169455 75.855251 9.398528 98 T A 43 -0.50000 -0.50000 "THR " " N  " "    " 7 0 0 0 5757FF  N1091  0 <> 1 0 0 0 0 0 0 <> <> 0 1094 <> 0 0 1 <> <> <> <> <>
  1095 3 42.270950 75.386226 8.547084 98 T A 2 0.14000 0.14000 "THR " " CA " "    " 6 0 0 0 A0A0A0  C1092  0 <> 1 0 0 0 0 0 0 <> <> 0 1095 <> 0 0 1 <> <> <> <> <>
  1096 2 42.940752 74.114481 9.130300 98 T A 2 0.50000 0.50000 "THR " " C  " "    " 6 0 0 0 A0A0A0  C1093  0 <> 1 0 0 0 0 0 0 <> <> 0 1096 <> 0 0 1 <> <> <> <> <>
  1097 15 42.674458 73.747899 10.282520 98 T A 70 -0.50000 -0.50000 "THR " " O  " "    " 8 0 0 0 FF2F2F  O1094  0 <> 1 0 0 0 0 0 0 <> <> 0 1097 <> 0 0 1 <> <> <> <> <>
  1098 3 43.272836 76.556645 8.382128 98 T A 2 0.20500 0.20500 "THR " " CB " "    " 6 0 0 0 A0A0A0  C1095  0 <> 1 0 0 0 0 0 0 <> <> 0 1098 <> 0 0 1 <> <> <> <> <>
  1099 16 43.842937 76.960403 9.605552 98 T A 70 -0.68300 -0.68300 "THR " " OG1" "    " 8 0 0 0 FF2F2F  O1096  0 <> 1 0 0 0 0 0 0 <> <> 0 1099 <> 0 0 1 <> <> <> <> <>
  1100 3 42.653848 77.796488 7.725337 98 T A 2 -0.18000 -0.18000 "THR " " CG2" "    " 6 0 0 0 A0A0A0  C1097  0 <> 1 0 0 0 0 0 0 <> <> 0 1100 <> 0 0 1 <> <> <> <> <>
  1101 43 41.345316 76.693732 9.951591 98 T A 21 0.30000 0.30000 "THR " " H  " "    " 1 0 0 0 FFFFFF  H1098  0 <> 1 0 0 0 0 0 0 <> <> 0 1101 <> 0 0 1 <> <> <> <> <>
  1102 41 41.872880 75.127189 7.564781 98 T A 21 0.06000 0.06000 "THR " " HA " "    " 1 0 0 0 FFFFFF  H1099  0 <> 1 0 0 0 0 0 0 <> <> 0 1102 <> 0 0 1 <> <> <> <> <>
  1103 41 44.097179 76.216214 7.758235 98 T A 21 0.06000 0.06000 "THR " " HB " "    " 1 0 0 0 FFFFFF  H1100  0 <> 1 0 0 0 0 0 0 <> <> 0 1103 <> 0 0 1 <> <> <> <> <>
  1104 42 43.185022 77.464506 10.102585 98 T A 21 0.41800 0.41800 "THR " " HG1" "    " 1 0 0 0 FFFFFF  H1101  0 <> 1 0 0 0 0 0 0 <> <> 0 1104 <> 0 0 1 <> <> <> <> <>
  1105 41 43.416092 78.541170 7.494276 98 T A 21 0.06000 0.06000 "THR " "1HG2" "    " 1 0 0 0 FFFFFF  H1102  0 <> 1 0 0 0 0 0 0 <> <> 0 1105 <> 0 0 1 <> <> <> <> <>
  1106 41 42.166677 77.523936 6.793261 98 T A 21 0.06000 0.06000 "THR " "2HG2" "    " 1 0 0 0 FFFFFF  H1103  0 <> 1 0 0 0 0 0 0 <> <> 0 1106 <> 0 0 1 <> <> <> <> <>
  1107 41 41.906613 78.272721 8.361020 98 T A 21 0.06000 0.06000 "THR " "3HG2" "    " 1 0 0 0 FFFFFF  H1104  0 <> 1 0 0 0 0 0 0 <> <> 0 1107 <> 0 0 1 <> <> <> <> <>
  1108 25 43.802895 73.423770 8.359754 99 F A 43 -0.50000 -0.50000 "PHE " " N  " "    " 7 0 0 0 5757FF  N1105  1 <> 1 0 0 0 0 0 0 <> <> 0 1108 <> 0 0 1 <> <> <> <> <>
  1109 3 44.447025 72.167231 8.768611 99 F A 2 0.14000 0.14000 "PHE " " CA " "    " 6 0 0 0 A0A0A0  C1106  1 <> 1 0 0 0 0 0 0 <> <> 0 1109 <> 0 0 1 <> <> <> <> <>
  1110 2 45.227932 72.305699 10.088781 99 F A 2 0.50000 0.50000 "PHE " " C  " "    " 6 0 0 0 A0A0A0  C1107  1 <> 1 0 0 0 0 0 0 <> <> 0 1110 <> 0 0 1 <> <> <> <> <>
  1111 15 44.934930 71.603064 11.062640 99 F A 70 -0.50000 -0.50000 "PHE " " O  " "    " 8 0 0 0 FF2F2F  O1108  1 <> 1 0 0 0 0 0 0 <> <> 0 1111 <> 0 0 1 <> <> <> <> <>
  1112 3 45.360443 71.632396 7.645667 99 F A 2 -0.00500 -0.00500 "PHE " " CB " "    " 6 0 0 0 A0A0A0  C1109  1 <> 1 0 0 0 0 0 0 <> <> 0 1112 <> 0 0 1 <> <> <> <> <>
  1113 2 46.224481 70.435651 8.038405 99 F A 2 -0.11500 -0.11500 "PHE " " CG " "    " 6 0 0 0 A0A0A0  C1110  1 <> 1 0 0 0 0 0 0 <> <> 0 1113 <> 0 0 1 <> <> <> <> <>
  1114 2 45.627497 69.201215 8.366773 99 F A 2 -0.11500 -0.11500 "PHE " " CD2" "    " 6 0 0 0 A0A0A0  C1111  1 <> 1 0 0 0 0 0 0 <> <> 0 1114 <> 0 0 1 <> <> <> <> <>
  1115 2 47.627030 70.567565 8.120377 99 F A 2 -0.11500 -0.11500 "PHE " " CD1" "    " 6 0 0 0 A0A0A0  C1112  1 <> 1 0 0 0 0 0 0 <> <> 0 1115 <> 0 0 1 <> <> <> <> <>
  1116 2 46.419991 68.120106 8.799787 99 F A 2 -0.11500 -0.11500 "PHE " " CE2" "    " 6 0 0 0 A0A0A0  C1113  1 <> 1 0 0 0 0 0 0 <> <> 0 1116 <> 0 0 1 <> <> <> <> <>
  1117 2 48.421728 69.482585 8.538883 99 F A 2 -0.11500 -0.11500 "PHE " " CE1" "    " 6 0 0 0 A0A0A0  C1114  1 <> 1 0 0 0 0 0 0 <> <> 0 1117 <> 0 0 1 <> <> <> <> <>
  1118 2 47.817974 68.259647 8.888214 99 F A 2 -0.11500 -0.11500 "PHE " " CZ " "    " 6 0 0 0 A0A0A0  C1115  1 <> 1 0 0 0 0 0 0 <> <> 0 1118 <> 0 0 1 <> <> <> <> <>
  1119 43 44.022593 73.758513 7.416856 99 F A 21 0.30000 0.30000 "PHE " " H  " "    " 1 0 0 0 FFFFFF  H1116  1 <> 1 0 0 0 0 0 0 <> <> 0 1119 <> 0 0 1 <> <> <> <> <>
  1120 41 43.651215 71.437568 8.928310 99 F A 21 0.06000 0.06000 "PHE " " HA " "    " 1 0 0 0 FFFFFF  H1117  1 <> 1 0 0 0 0 0 0 <> <> 0 1120 <> 0 0 1 <> <> <> <> <>
  1121 41 44.743559 71.369956 6.786799 99 F A 21 0.06000 0.06000 "PHE " "1HB " "    " 1 0 0 0 FFFFFF  H1118  1 <> 1 0 0 0 0 0 0 <> <> 0 1121 <> 0 0 1 <> <> <> <> <>
  1122 41 46.015238 72.429874 7.297615 99 F A 21 0.06000 0.06000 "PHE " "2HB " "    " 1 0 0 0 FFFFFF  H1119  1 <> 1 0 0 0 0 0 0 <> <> 0 1122 <> 0 0 1 <> <> <> <> <>
  1123 41 44.556478 69.078498 8.289807 99 F A 21 0.11500 0.11500 "PHE " " HD2" "    " 1 0 0 0 FFFFFF  H1120  1 <> 1 0 0 0 0 0 0 <> <> 0 1123 <> 0 0 1 <> <> <> <> <>
  1124 41 48.099496 71.503272 7.862962 99 F A 21 0.11500 0.11500 "PHE " " HD1" "    " 1 0 0 0 FFFFFF  H1121  1 <> 1 0 0 0 0 0 0 <> <> 0 1124 <> 0 0 1 <> <> <> <> <>
  1125 41 45.946641 67.180939 9.053612 99 F A 21 0.11500 0.11500 "PHE " " HE2" "    " 1 0 0 0 FFFFFF  H1122  1 <> 1 0 0 0 0 0 0 <> <> 0 1125 <> 0 0 1 <> <> <> <> <>
  1126 41 49.495169 69.590999 8.582927 99 F A 21 0.11500 0.11500 "PHE " " HE1" "    " 1 0 0 0 FFFFFF  H1123  1 <> 1 0 0 0 0 0 0 <> <> 0 1126 <> 0 0 1 <> <> <> <> <>
  1127 41 48.425053 67.425803 9.206955 99 F A 21 0.11500 0.11500 "PHE " " HZ " "    " 1 0 0 0 FFFFFF  H1124  1 <> 1 0 0 0 0 0 0 <> <> 0 1127 <> 0 0 1 <> <> <> <> <>
  1128 25 46.184146 73.245561 10.128237 100 E A 43 -0.50000 -0.50000 "GLU " " N  " "    " 7 0 0 0 5757FF  N1125  1 <> 1 0 0 0 0 0 0 <> <> 0 1128 <> 0 0 1 <> <> <> <> <>
  1129 3 47.045925 73.505732 11.281918 100 E A 2 0.14000 0.14000 "GLU " " CA " "    " 6 0 0 0 A0A0A0  C1126  1 <> 1 0 0 0 0 0 0 <> <> 0 1129 <> 0 0 1 <> <> <> <> <>
  1130 2 46.240040 74.074384 12.464675 100 E A 2 0.50000 0.50000 "GLU " " C  " "    " 6 0 0 0 A0A0A0  C1127  1 <> 1 0 0 0 0 0 0 <> <> 0 1130 <> 0 0 1 <> <> <> <> <>
  1131 15 46.572834 73.826611 13.624268 100 E A 70 -0.50000 -0.50000 "GLU " " O  " "    " 8 0 0 0 FF2F2F  O1128  1 <> 1 0 0 0 0 0 0 <> <> 0 1131 <> 0 0 1 <> <> <> <> <>
  1132 3 48.197614 74.451985 10.856338 100 E A 2 -0.12000 -0.12000 "GLU " " CB " "    " 6 0 0 0 A0A0A0  C1129  1 <> 1 0 0 0 0 0 0 <> <> 0 1132 <> 0 0 1 <> <> <> <> <>
  1133 3 49.195933 74.890258 11.961207 100 E A 2 -0.22000 -0.22000 "GLU " " CG " "    " 6 0 0 0 A0A0A0  C1130  1 <> 1 0 0 0 0 0 0 <> <> 0 1133 <> 0 0 1 <> <> <> <> <>
  1134 2 50.010203 73.755955 12.578149 100 E A 2 0.70000 0.70000 "GLU " " CD " "    " 6 0 0 0 A0A0A0  C1131  1 <> 1 0 0 0 0 0 0 <> <> 0 1134 <> 0 0 1 <> <> <> <> <>
  1135 18 49.947454 72.610392 12.090246 100 E A 70 -0.80000 -0.80000 "GLU " " OE1" "    " 8 -1 0 0 FF2F2F  O1132  1 <> 1 0 0 0 0 0 0 <> <> 0 1135 <> 0 0 1 <> <> <> <> <>
  1136 15 50.736580 74.002681 13.567095 100 E A 70 -0.80000 -0.80000 "GLU " " OE2" "    " 8 0 0 0 FF2F2F  O1133  1 <> 1 0 0 0 0 0 0 <> <> 0 1136 <> 0 0 1 <> <> <> <> <>
  1137 43 46.321721 73.794206 9.291781 100 E A 21 0.30000 0.30000 "GLU " " H  " "    " 1 0 0 0 FFFFFF  H1134  1 <> 1 0 0 0 0 0 0 <> <> 0 1137 <> 0 0 1 <> <> <> <> <>
  1138 41 47.465645 72.549137 11.596238 100 E A 21 0.06000 0.06000 "GLU " " HA " "    " 1 0 0 0 FFFFFF  H1135  1 <> 1 0 0 0 0 0 0 <> <> 0 1138 <> 0 0 1 <> <> <> <> <>
  1139 41 48.764570 73.970272 10.058707 100 E A 21 0.06000 0.06000 "GLU " "1HB " "    " 1 0 0 0 FFFFFF  H1136  1 <> 1 0 0 0 0 0 0 <> <> 0 1139 <> 0 0 1 <> <> <> <> <>
  1140 41 47.771612 75.354014 10.415400 100 E A 21 0.06000 0.06000 "GLU " "2HB " "    " 1 0 0 0 FFFFFF  H1137  1 <> 1 0 0 0 0 0 0 <> <> 0 1140 <> 0 0 1 <> <> <> <> <>
  1141 41 49.907967 75.597059 11.535849 100 E A 21 0.06000 0.06000 "GLU " "1HG " "    " 1 0 0 0 FFFFFF  H1138  1 <> 1 0 0 0 0 0 0 <> <> 0 1141 <> 0 0 1 <> <> <> <> <>
  1142 41 48.685791 75.426064 12.760946 100 E A 21 0.06000 0.06000 "GLU " "2HG " "    " 1 0 0 0 FFFFFF  H1139  1 <> 1 0 0 0 0 0 0 <> <> 0 1142 <> 0 0 1 <> <> <> <> <>
  1143 25 45.126354 74.768001 12.197753 101 E A 43 -0.50000 -0.50000 "GLU " " N  " "    " 7 0 0 0 5757FF  N1140  1 <> 1 0 0 0 0 0 0 <> <> 0 1143 <> 0 0 1 <> <> <> <> <>
  1144 3 44.227038 75.229882 13.238734 101 E A 2 0.14000 0.14000 "GLU " " CA " "    " 6 0 0 0 A0A0A0  C1141  1 <> 1 0 0 0 0 0 0 <> <> 0 1144 <> 0 0 1 <> <> <> <> <>
  1145 2 43.456396 74.067780 13.857821 101 E A 2 0.50000 0.50000 "GLU " " C  " "    " 6 0 0 0 A0A0A0  C1142  1 <> 1 0 0 0 0 0 0 <> <> 0 1145 <> 0 0 1 <> <> <> <> <>
  1146 15 43.394971 74.020584 15.079355 101 E A 70 -0.50000 -0.50000 "GLU " " O  " "    " 8 0 0 0 FF2F2F  O1143  1 <> 1 0 0 0 0 0 0 <> <> 0 1146 <> 0 0 1 <> <> <> <> <>
  1147 3 43.200899 76.192310 12.673078 101 E A 2 -0.12000 -0.12000 "GLU " " CB " "    " 6 0 0 0 A0A0A0  C1144  1 <> 1 0 0 0 0 0 0 <> <> 0 1147 <> 0 0 1 <> <> <> <> <>
  1148 3 43.715087 77.630168 12.590933 101 E A 2 -0.22000 -0.22000 "GLU " " CG " "    " 6 0 0 0 A0A0A0  C1145  1 <> 1 0 0 0 0 0 0 <> <> 0 1148 <> 0 0 1 <> <> <> <> <>
  1149 2 42.520557 78.488903 12.259837 101 E A 2 0.70000 0.70000 "GLU " " CD " "    " 6 0 0 0 A0A0A0  C1146  1 <> 1 0 0 0 0 0 0 <> <> 0 1149 <> 0 0 1 <> <> <> <> <>
  1150 18 41.954883 78.250328 11.167862 101 E A 70 -0.80000 -0.80000 "GLU " " OE1" "    " 8 -1 0 0 FF2F2F  O1147  1 <> 1 0 0 0 0 0 0 <> <> 0 1150 <> 0 0 1 <> <> <> <> <>
  1151 15 42.105207 79.191408 13.208618 101 E A 70 -0.80000 -0.80000 "GLU " " OE2" "    " 8 0 0 0 FF2F2F  O1148  1 <> 1 0 0 0 0 0 0 <> <> 0 1151 <> 0 0 1 <> <> <> <> <>
  1152 43 44.869153 74.936755 11.233122 101 E A 21 0.30000 0.30000 "GLU " " H  " "    " 1 0 0 0 FFFFFF  H1149  1 <> 1 0 0 0 0 0 0 <> <> 0 1152 <> 0 0 1 <> <> <> <> <>
  1153 41 44.801920 75.720661 14.026642 101 E A 21 0.06000 0.06000 "GLU " " HA " "    " 1 0 0 0 FFFFFF  H1150  1 <> 1 0 0 0 0 0 0 <> <> 0 1153 <> 0 0 1 <> <> <> <> <>
  1154 41 42.844206 75.847522 11.705079 101 E A 21 0.06000 0.06000 "GLU " "1HB " "    " 1 0 0 0 FFFFFF  H1151  1 <> 1 0 0 0 0 0 0 <> <> 0 1154 <> 0 0 1 <> <> <> <> <>
  1155 41 42.311269 76.193936 13.306600 101 E A 21 0.06000 0.06000 "GLU " "2HB " "    " 1 0 0 0 FFFFFF  H1152  1 <> 1 0 0 0 0 0 0 <> <> 0 1155 <> 0 0 1 <> <> <> <> <>
  1156 41 44.144066 77.951507 13.539210 101 E A 21 0.06000 0.06000 "GLU " "1HG " "    " 1 0 0 0 FFFFFF  H1153  1 <> 1 0 0 0 0 0 0 <> <> 0 1156 <> 0 0 1 <> <> <> <> <>
  1157 41 44.502681 77.754922 11.850166 101 E A 21 0.06000 0.06000 "GLU " "2HG " "    " 1 0 0 0 FFFFFF  H1154  1 <> 1 0 0 0 0 0 0 <> <> 0 1157 <> 0 0 1 <> <> <> <> <>
  1158 25 42.897466 73.128645 13.084187 102 Y A 43 -0.50000 -0.50000 "TYR " " N  " "    " 7 0 0 1 5757FF  N1155  1 <> 1 0 0 0 0 0 0 <> <> 0 1158 <> 0 0 1 <> <> <> <> <>
  1159 3 42.263000 71.926060 13.638838 102 Y A 2 0.14000 0.14000 "TYR " " CA " "    " 6 0 0 1 A0A0A0  C1156  1 <> 1 0 0 0 0 0 0 <> <> 0 1159 <> 0 0 1 <> <> <> <> <>
  1160 2 43.252997 71.086178 14.459188 102 Y A 2 0.50000 0.50000 "TYR " " C  " "    " 6 0 0 1 A0A0A0  C1157  1 <> 1 0 0 0 0 0 0 <> <> 0 1160 <> 0 0 1 <> <> <> <> <>
  1161 15 42.875349 70.571346 15.510853 102 Y A 70 -0.50000 -0.50000 "TYR " " O  " "    " 8 0 0 1 FF2F2F  O1158  1 <> 1 0 0 0 0 0 0 <> <> 0 1161 <> 0 0 1 <> <> <> <> <>
  1162 3 41.589774 71.082848 12.545732 102 Y A 2 -0.00500 -0.00500 "TYR " " CB " "    " 6 0 0 1 A0A0A0  C1159  1 <> 1 0 0 0 0 0 0 <> <> 0 1162 <> 0 0 1 <> <> <> <> <>
  1163 2 40.121946 71.385806 12.329000 102 Y A 2 -0.11500 -0.11500 "TYR " " CG " "    " 6 0 0 1 A0A0A0  C1160  1 <> 1 0 0 0 0 0 0 <> <> 0 1163 <> 0 0 1 <> <> <> <> <>
  1164 2 39.176001 71.153309 13.350444 102 Y A 2 -0.11500 -0.11500 "TYR " " CD1" "    " 6 0 0 1 A0A0A0  C1161  1 <> 1 0 0 0 0 0 0 <> <> 0 1164 <> 0 0 1 <> <> <> <> <>
  1165 2 37.804060 71.368233 13.111568 102 Y A 2 -0.11500 -0.11500 "TYR " " CE1" "    " 6 0 0 1 A0A0A0  C1162  1 <> 1 0 0 0 0 0 0 <> <> 0 1165 <> 0 0 1 <> <> <> <> <>
  1166 2 39.691139 71.857054 11.078309 102 Y A 2 -0.11500 -0.11500 "TYR " " CD2" "    " 6 0 0 1 A0A0A0  C1163  1 <> 1 0 0 0 0 0 0 <> <> 0 1166 <> 0 0 1 <> <> <> <> <>
  1167 2 38.327344 72.100757 10.854883 102 Y A 2 -0.11500 -0.11500 "TYR " " CE2" "    " 6 0 0 1 A0A0A0  C1164  1 <> 1 0 0 0 0 0 0 <> <> 0 1167 <> 0 0 1 <> <> <> <> <>
  1168 2 37.382339 71.857995 11.861547 102 Y A 2 0.15000 0.15000 "TYR " " CZ " "    " 6 0 0 1 A0A0A0  C1165  1 <> 1 0 0 0 0 0 0 <> <> 0 1168 <> 0 0 1 <> <> <> <> <>
  1169 16 36.074336 72.153352 11.622558 102 Y A 70 -0.58500 -0.58500 "TYR " " OH " "    " 8 0 0 1 FF2F2F  O1166  1 <> 1 0 0 0 0 0 0 <> <> 0 1169 <> 0 0 1 <> <> <> <> <>
  1170 43 42.928527 73.240188 12.070107 102 Y A 21 0.30000 0.30000 "TYR " " H  " "    " 1 0 0 1 FFFFFF  H1167  1 <> 1 0 0 0 0 0 0 <> <> 0 1170 <> 0 0 1 <> <> <> <> <>
  1171 41 41.497394 72.253976 14.344160 102 Y A 21 0.06000 0.06000 "TYR " " HA " "    " 1 0 0 0 FFFFFF  H1168  1 <> 1 0 0 0 0 0 0 <> <> 0 1171 <> 0 0 1 <> <> <> <> <>
  1172 41 42.119086 71.222602 11.605414 102 Y A 21 0.06000 0.06000 "TYR " "1HB " "    " 1 0 0 0 FFFFFF  H1169  1 <> 1 0 0 0 0 0 0 <> <> 0 1172 <> 0 0 1 <> <> <> <> <>
  1173 41 41.654738 70.015652 12.771659 102 Y A 21 0.06000 0.06000 "TYR " "2HB " "    " 1 0 0 0 FFFFFF  H1170  1 <> 1 0 0 0 0 0 0 <> <> 0 1173 <> 0 0 1 <> <> <> <> <>
  1174 41 39.492281 70.771251 14.310432 102 Y A 21 0.11500 0.11500 "TYR " " HD1" "    " 1 0 0 0 FFFFFF  H1171  1 <> 1 0 0 0 0 0 0 <> <> 0 1174 <> 0 0 1 <> <> <> <> <>
  1175 41 37.089501 71.160361 13.894149 102 Y A 21 0.11500 0.11500 "TYR " " HE1" "    " 1 0 0 0 FFFFFF  H1172  1 <> 1 0 0 0 0 0 0 <> <> 0 1175 <> 0 0 1 <> <> <> <> <>
  1176 41 40.406469 72.032353 10.287816 102 Y A 21 0.11500 0.11500 "TYR " " HD2" "    " 1 0 0 0 FFFFFF  H1173  1 <> 1 0 0 0 0 0 0 <> <> 0 1176 <> 0 0 1 <> <> <> <> <>
  1177 41 38.010415 72.474231 9.901015 102 Y A 21 0.11500 0.11500 "TYR " " HE2" "    " 1 0 0 0 FFFFFF  H1174  1 <> 1 0 0 0 0 0 0 <> <> 0 1177 <> 0 0 1 <> <> <> <> <>
  1178 42 35.480213 71.424310 11.781962 102 Y A 21 0.43500 0.43500 "TYR " " HH " "    " 1 0 0 1 FFFFFF  H1175  1 <> 1 0 0 0 0 0 0 <> <> 0 1178 <> 0 0 1 <> <> <> <> <>
  1179 25 44.539289 71.066128 14.072440 103 Y A 43 -0.50000 -0.50000 "TYR " " N  " "    " 7 0 0 0 5757FF  N1176  1 <> 1 0 0 0 0 0 0 <> <> 0 1179 <> 0 0 1 <> <> <> <> <>
  1180 3 45.623593 70.582264 14.919648 103 Y A 2 0.14000 0.14000 "TYR " " CA " "    " 6 0 0 0 A0A0A0  C1177  1 <> 1 0 0 0 0 0 0 <> <> 0 1180 <> 0 0 1 <> <> <> <> <>
  1181 2 45.726668 71.387241 16.235869 103 Y A 2 0.50000 0.50000 "TYR " " C  " "    " 6 0 0 0 A0A0A0  C1178  1 <> 1 0 0 0 0 0 0 <> <> 0 1181 <> 0 0 1 <> <> <> <> <>
  1182 15 45.399324 70.857707 17.301161 103 Y A 70 -0.50000 -0.50000 "TYR " " O  " "    " 8 0 0 0 FF2F2F  O1179  1 <> 1 0 0 0 0 0 0 <> <> 0 1182 <> 0 0 1 <> <> <> <> <>
  1183 3 46.971551 70.501535 14.160966 103 Y A 2 -0.00500 -0.00500 "TYR " " CB " "    " 6 0 0 0 A0A0A0  C1180  1 <> 1 0 0 0 0 0 0 <> <> 0 1183 <> 0 0 1 <> <> <> <> <>
  1184 2 48.114254 69.994866 15.016288 103 Y A 2 -0.11500 -0.11500 "TYR " " CG " "    " 6 0 0 0 A0A0A0  C1181  1 <> 1 0 0 0 0 0 0 <> <> 0 1184 <> 0 0 1 <> <> <> <> <>
  1185 2 47.989014 68.776784 15.716341 103 Y A 2 -0.11500 -0.11500 "TYR " " CD1" "    " 6 0 0 0 A0A0A0  C1182  1 <> 1 0 0 0 0 0 0 <> <> 0 1185 <> 0 0 1 <> <> <> <> <>
  1186 2 48.966649 68.406488 16.653170 103 Y A 2 -0.11500 -0.11500 "TYR " " CE1" "    " 6 0 0 0 A0A0A0  C1183  1 <> 1 0 0 0 0 0 0 <> <> 0 1186 <> 0 0 1 <> <> <> <> <>
  1187 2 49.269805 70.782893 15.176361 103 Y A 2 -0.11500 -0.11500 "TYR " " CD2" "    " 6 0 0 0 A0A0A0  C1184  1 <> 1 0 0 0 0 0 0 <> <> 0 1187 <> 0 0 1 <> <> <> <> <>
  1188 2 50.255656 70.400229 16.099611 103 Y A 2 -0.11500 -0.11500 "TYR " " CE2" "    " 6 0 0 0 A0A0A0  C1185  1 <> 1 0 0 0 0 0 0 <> <> 0 1188 <> 0 0 1 <> <> <> <> <>
  1189 2 50.081626 69.236151 16.870867 103 Y A 2 0.15000 0.15000 "TYR " " CZ " "    " 6 0 0 0 A0A0A0  C1186  1 <> 1 0 0 0 0 0 0 <> <> 0 1189 <> 0 0 1 <> <> <> <> <>
  1190 16 50.961469 68.934841 17.863952 103 Y A 70 -0.58500 -0.58500 "TYR " " OH " "    " 8 0 0 0 FF2F2F  O1187  1 <> 1 0 0 0 0 0 0 <> <> 0 1190 <> 0 0 1 <> <> <> <> <>
  1191 43 44.766074 71.501678 13.184168 103 Y A 21 0.30000 0.30000 "TYR " " H  " "    " 1 0 0 0 FFFFFF  H1188  1 <> 1 0 0 0 0 0 0 <> <> 0 1191 <> 0 0 1 <> <> <> <> <>
  1192 41 45.354952 69.568995 15.197210 103 Y A 21 0.06000 0.06000 "TYR " " HA " "    " 1 0 0 0 FFFFFF  H1189  1 <> 1 0 0 0 0 0 0 <> <> 0 1192 <> 0 0 1 <> <> <> <> <>
  1193 41 46.904017 69.828551 13.313882 103 Y A 21 0.06000 0.06000 "TYR " "1HB " "    " 1 0 0 0 FFFFFF  H1190  1 <> 1 0 0 0 0 0 0 <> <> 0 1193 <> 0 0 1 <> <> <> <> <>
  1194 41 47.243981 71.466297 13.741421 103 Y A 21 0.06000 0.06000 "TYR " "2HB " "    " 1 0 0 0 FFFFFF  H1191  1 <> 1 0 0 0 0 0 0 <> <> 0 1194 <> 0 0 1 <> <> <> <> <>
  1195 41 47.119262 68.149960 15.585230 103 Y A 21 0.11500 0.11500 "TYR " " HD1" "    " 1 0 0 0 FFFFFF  H1192  1 <> 1 0 0 0 0 0 0 <> <> 0 1195 <> 0 0 1 <> <> <> <> <>
  1196 41 48.826745 67.507035 17.229665 103 Y A 21 0.11500 0.11500 "TYR " " HE1" "    " 1 0 0 0 FFFFFF  H1193  1 <> 1 0 0 0 0 0 0 <> <> 0 1196 <> 0 0 1 <> <> <> <> <>
  1197 41 49.394439 71.699891 14.615809 103 Y A 21 0.11500 0.11500 "TYR " " HD2" "    " 1 0 0 0 FFFFFF  H1194  1 <> 1 0 0 0 0 0 0 <> <> 0 1197 <> 0 0 1 <> <> <> <> <>
  1198 41 51.118372 71.035597 16.228260 103 Y A 21 0.11500 0.11500 "TYR " " HE2" "    " 1 0 0 0 FFFFFF  H1195  1 <> 1 0 0 0 0 0 0 <> <> 0 1198 <> 0 0 1 <> <> <> <> <>
  1199 42 51.708259 69.550788 17.901973 103 Y A 21 0.43500 0.43500 "TYR " " HH " "    " 1 0 0 0 FFFFFF  H1196  1 <> 1 0 0 0 0 0 0 <> <> 0 1199 <> 0 0 1 <> <> <> <> <>
  1200 25 46.152254 72.656846 16.175316 104 Q A 43 -0.50000 -0.50000 "GLN " " N  " "    " 7 0 0 0 5757FF  N1197  1 <> 1 0 0 0 0 0 0 <> <> 0 1200 <> 0 0 1 <> <> <> <> <>
  1201 3 46.528817 73.460177 17.343418 104 Q A 2 0.14000 0.14000 "GLN " " CA " "    " 6 0 0 0 A0A0A0  C1198  1 <> 1 0 0 0 0 0 0 <> <> 0 1201 <> 0 0 1 <> <> <> <> <>
  1202 2 45.317854 73.864916 18.212364 104 Q A 2 0.50000 0.50000 "GLN " " C  " "    " 6 0 0 0 A0A0A0  C1199  1 <> 1 0 0 0 0 0 0 <> <> 0 1202 <> 0 0 1 <> <> <> <> <>
  1203 15 45.455283 73.981215 19.429266 104 Q A 70 -0.50000 -0.50000 "GLN " " O  " "    " 8 0 0 0 FF2F2F  O1200  1 <> 1 0 0 0 0 0 0 <> <> 0 1203 <> 0 0 1 <> <> <> <> <>
  1204 3 47.246720 74.744388 16.872214 104 Q A 2 -0.12000 -0.12000 "GLN " " CB " "    " 6 0 0 0 A0A0A0  C1201  1 <> 1 0 0 0 0 0 0 <> <> 0 1204 <> 0 0 1 <> <> <> <> <>
  1205 3 48.554614 74.522679 16.079529 104 Q A 2 -0.12000 -0.12000 "GLN " " CG " "    " 6 0 0 0 A0A0A0  C1202  1 <> 1 0 0 0 0 0 0 <> <> 0 1205 <> 0 0 1 <> <> <> <> <>
  1206 2 49.787825 74.114451 16.886757 104 Q A 2 0.50000 0.50000 "GLN " " CD " "    " 6 0 0 0 A0A0A0  C1203  1 <> 1 0 0 0 0 0 0 <> <> 0 1206 <> 0 0 1 <> <> <> <> <>
  1207 15 49.767072 73.930293 18.104297 104 Q A 70 -0.50000 -0.50000 "GLN " " OE1" "    " 8 0 0 0 FF2F2F  O1204  1 <> 1 0 0 0 0 0 0 <> <> 0 1207 <> 0 0 1 <> <> <> <> <>
  1208 25 50.903761 73.961744 16.192964 104 Q A 43 -0.76000 -0.76000 "GLN " " NE2" "    " 7 0 0 0 5757FF  N1205  1 <> 1 0 0 0 0 0 0 <> <> 0 1208 <> 0 0 1 <> <> <> <> <>
  1209 43 46.349881 73.046622 15.252568 104 Q A 21 0.30000 0.30000 "GLN " " H  " "    " 1 0 0 0 FFFFFF  H1206  1 <> 1 0 0 0 0 0 0 <> <> 0 1209 <> 0 0 1 <> <> <> <> <>
  1210 41 47.206129 72.872605 17.965643 104 Q A 21 0.06000 0.06000 "GLN " " HA " "    " 1 0 0 0 FFFFFF  H1207  1 <> 1 0 0 0 0 0 0 <> <> 0 1210 <> 0 0 1 <> <> <> <> <>
  1211 41 46.566301 75.321080 16.243680 104 Q A 21 0.06000 0.06000 "GLN " "1HB " "    " 1 0 0 0 FFFFFF  H1208  1 <> 1 0 0 0 0 0 0 <> <> 0 1211 <> 0 0 1 <> <> <> <> <>
  1212 41 47.462452 75.382249 17.731544 104 Q A 21 0.06000 0.06000 "GLN " "2HB " "    " 1 0 0 0 FFFFFF  H1209  1 <> 1 0 0 0 0 0 0 <> <> 0 1212 <> 0 0 1 <> <> <> <> <>
  1213 41 48.412445 73.780205 15.296968 104 Q A 21 0.06000 0.06000 "GLN " "1HG " "    " 1 0 0 0 FFFFFF  H1210  1 <> 1 0 0 0 0 0 0 <> <> 0 1213 <> 0 0 1 <> <> <> <> <>
  1214 41 48.803717 75.448262 15.558613 104 Q A 21 0.06000 0.06000 "GLN " "2HG " "    " 1 0 0 0 FFFFFF  H1211  1 <> 1 0 0 0 0 0 0 <> <> 0 1214 <> 0 0 1 <> <> <> <> <>
  1215 43 51.791179 73.723701 16.596149 104 Q A 21 0.38000 0.38000 "GLN " "1HE2" "    " 1 0 0 0 FFFFFF  H1212  1 <> 1 0 0 0 0 0 0 <> <> 0 1215 <> 0 0 1 <> <> <> <> <>
  1216 43 50.835852 74.072185 15.156734 104 Q A 21 0.38000 0.38000 "GLN " "2HE2" "    " 1 0 0 0 FFFFFF  H1213  1 <> 1 0 0 0 0 0 0 <> <> 0 1216 <> 0 0 1 <> <> <> <> <>
  1217 25 44.124271 74.041759 17.621893 105 H A 43 -0.50000 -0.50000 "HIS " " N  " "    " 7 0 0 0 5757FF  N1214  1 <> 1 0 0 0 0 0 0 <> <> 0 1217 <> 0 0 1 <> <> <> <> <>
  1218 3 42.878471 74.323929 18.341023 105 H A 2 0.14000 0.14000 "HIS " " CA " "    " 6 0 0 0 A0A0A0  C1215  1 <> 1 0 0 0 0 0 0 <> <> 0 1218 <> 0 0 1 <> <> <> <> <>
  1219 2 42.384599 73.054867 19.054418 105 H A 2 0.50000 0.50000 "HIS " " C  " "    " 6 0 0 0 A0A0A0  C1216  1 <> 1 0 0 0 0 0 0 <> <> 0 1219 <> 0 0 1 <> <> <> <> <>
  1220 15 41.810210 73.178855 20.137167 105 H A 70 -0.50000 -0.50000 "HIS " " O  " "    " 8 0 0 0 FF2F2F  O1217  1 <> 1 0 0 0 0 0 0 <> <> 0 1220 <> 0 0 1 <> <> <> <> <>
  1221 3 41.690464 74.730460 17.413383 105 H A 2 -0.00500 -0.00500 "HIS " " CB " "    " 6 0 0 0 A0A0A0  C1218  1 <> 1 0 0 0 0 0 0 <> <> 0 1221 <> 0 0 1 <> <> <> <> <>
  1222 2 41.673895 76.054046 16.665641 105 H A 2 0.21500 0.21500 "HIS " " CG " "    " 6 0 0 0 A0A0A0  C1219  1 <> 1 0 0 0 0 0 0 <> <> 0 1222 <> 0 0 1 <> <> <> <> <>
  1223 2 42.666749 76.903162 16.192732 105 H A 2 0.21500 0.21500 "HIS " " CD2" "    " 6 0 0 0 A0A0A0  C1220  1 <> 1 0 0 0 0 0 0 <> <> 0 1223 <> 0 0 1 <> <> <> <> <>
  1224 31 40.466802 76.588441 16.229764 105 H A 43 -0.54000 -0.54000 "HIS " " ND1" "    " 7 1 0 0 5757FF  N1221  1 <> 1 0 0 0 0 0 0 <> <> 0 1224 <> 0 0 1 <> <> <> <> <>
  1225 2 40.733852 77.675863 15.519954 105 H A 2 0.38500 0.38500 "HIS " " CE1" "    " 6 0 0 0 A0A0A0  C1222  1 <> 1 0 0 0 0 0 0 <> <> 0 1225 <> 0 0 1 <> <> <> <> <>
  1226 25 42.029810 77.920696 15.489212 105 H A 43 -0.54000 -0.54000 "HIS " " NE2" "    " 7 0 0 0 5757FF  N1223  1 <> 1 0 0 0 0 0 0 <> <> 0 1226 <> 0 0 1 <> <> <> <> <>
  1227 43 44.059551 73.892475 16.612014 105 H A 21 0.30000 0.30000 "HIS " " H  " "    " 1 0 0 0 FFFFFF  H1224  1 <> 1 0 0 0 0 0 0 <> <> 0 1227 <> 0 0 1 <> <> <> <> <>
  1228 41 43.050268 75.107114 19.081906 105 H A 21 0.06000 0.06000 "HIS " " HA " "    " 1 0 0 0 FFFFFF  H1225  1 <> 1 0 0 0 0 0 0 <> <> 0 1228 <> 0 0 1 <> <> <> <> <>
  1229 41 41.487427 73.939595 16.689364 105 H A 21 0.06000 0.06000 "HIS " "1HB " "    " 1 0 0 0 FFFFFF  H1226  1 <> 1 0 0 0 0 0 0 <> <> 0 1229 <> 0 0 1 <> <> <> <> <>
  1230 41 40.791228 74.760315 18.032964 105 H A 21 0.06000 0.06000 "HIS " "2HB " "    " 1 0 0 0 FFFFFF  H1227  1 <> 1 0 0 0 0 0 0 <> <> 0 1230 <> 0 0 1 <> <> <> <> <>
  1231 41 43.745065 76.841619 16.236677 105 H A 21 0.11500 0.11500 "HIS " " HD2" "    " 1 0 0 0 FFFFFF  H1228  1 <> 1 0 0 0 0 0 0 <> <> 0 1231 <> 0 0 1 <> <> <> <> <>
  1232 44 39.541283 76.136456 16.163609 105 H A 21 0.46000 0.46000 "HIS " " HD1" "    " 1 0 0 0 FFFFFF  H1229  1 <> 1 0 0 0 0 0 0 <> <> 0 1232 <> 0 0 1 <> <> <> <> <>
  1233 41 40.012064 78.225029 14.928106 105 H A 21 0.11500 0.11500 "HIS " " HE1" "    " 1 0 0 0 FFFFFF  H1230  1 <> 1 0 0 0 0 0 0 <> <> 0 1233 <> 0 0 1 <> <> <> <> <>
  1234 43 42.361124 78.560516 14.726332 105 H A 21 0.46000 0.46000 "HIS " " HE2" "    " 1 0 0 0 FFFFFF  H1231  1 <> 1 0 0 0 0 0 0 <> <> 0 1234 <> 0 0 1 <> <> <> <> <>
  1235 25 42.567361 71.864227 18.455996 106 D A 43 -0.50000 -0.50000 "ASP " " N  " "    " 7 0 0 0 5757FF  N1232  0 <> 1 0 0 0 0 0 0 <> <> 0 1235 <> 0 0 1 <> <> <> <> <>
  1236 3 41.716761 70.688804 18.674118 106 D A 2 0.14000 0.14000 "ASP " " CA " "    " 6 0 0 0 A0A0A0  C1233  0 <> 1 0 0 0 0 0 0 <> <> 0 1236 <> 0 0 1 <> <> <> <> <>
  1237 2 42.485395 69.370492 18.803568 106 D A 2 0.50000 0.50000 "ASP " " C  " "    " 6 0 0 0 A0A0A0  C1234  0 <> 1 0 0 0 0 0 0 <> <> 0 1237 <> 0 0 1 <> <> <> <> <>
  1238 15 42.665312 68.869924 19.917832 106 D A 70 -0.50000 -0.50000 "ASP " " O  " "    " 8 0 0 0 FF2F2F  O1235  0 <> 1 0 0 0 0 0 0 <> <> 0 1238 <> 0 0 1 <> <> <> <> <>
  1239 3 40.560903 70.650916 17.644087 106 D A 2 -0.22000 -0.22000 "ASP " " CB " "    " 6 0 0 0 A0A0A0  C1236  0 <> 1 0 0 0 0 0 0 <> <> 0 1239 <> 0 0 1 <> <> <> <> <>
  1240 2 39.200838 70.567461 18.303187 106 D A 2 0.70000 0.70000 "ASP " " CG " "    " 6 0 0 0 A0A0A0  C1237  0 <> 1 0 0 0 0 0 0 <> <> 0 1240 <> 0 0 1 <> <> <> <> <>
  1241 18 38.952607 69.622729 19.085936 106 D A 70 -0.80000 -0.80000 "ASP " " OD1" "    " 8 -1 0 0 FF2F2F  O1238  0 <> 1 0 0 0 0 0 0 <> <> 0 1241 <> 0 0 1 <> <> <> <> <>
  1242 15 38.330859 71.421298 18.029894 106 D A 70 -0.80000 -0.80000 "ASP " " OD2" "    " 8 0 0 0 FF2F2F  O1239  0 <> 1 0 0 0 0 0 0 <> <> 0 1242 <> 0 0 1 <> <> <> <> <>
  1243 43 43.149071 71.828277 17.625505 106 D A 21 0.30000 0.30000 "ASP " " H  " "    " 1 0 0 0 FFFFFF  H1240  0 <> 1 0 0 0 0 0 0 <> <> 0 1243 <> 0 0 1 <> <> <> <> <>
  1244 41 41.267458 70.809235 19.662435 106 D A 21 0.06000 0.06000 "ASP " " HA " "    " 1 0 0 0 FFFFFF  H1241  0 <> 1 0 0 0 0 0 0 <> <> 0 1244 <> 0 0 1 <> <> <> <> <>
  1245 41 40.572507 71.531699 17.002011 106 D A 21 0.06000 0.06000 "ASP " "1HB " "    " 1 0 0 0 FFFFFF  H1242  0 <> 1 0 0 0 0 0 0 <> <> 0 1245 <> 0 0 1 <> <> <> <> <>
  1246 41 40.641094 69.801936 16.964458 106 D A 21 0.06000 0.06000 "ASP " "2HB " "    " 1 0 0 0 FFFFFF  H1243  0 <> 1 0 0 0 0 0 0 <> <> 0 1246 <> 0 0 1 <> <> <> <> <>
  1247 25 42.960248 68.799468 17.691145 107 T A 43 -0.50000 -0.50000 "THR " " N  " "    " 7 0 0 0 5757FF  N1244  1 <> 1 0 0 0 0 0 0 <> <> 0 1247 <> 0 0 1 <> <> <> <> <>
  1248 3 43.511918 67.444690 17.593075 107 T A 2 0.14000 0.14000 "THR " " CA " "    " 6 0 0 0 A0A0A0  C1245  1 <> 1 0 0 0 0 0 0 <> <> 0 1248 <> 0 0 1 <> <> <> <> <>
  1249 2 44.798854 67.243008 18.426705 107 T A 2 0.50000 0.50000 "THR " " C  " "    " 6 0 0 0 A0A0A0  C1246  1 <> 1 0 0 0 0 0 0 <> <> 0 1249 <> 0 0 1 <> <> <> <> <>
  1250 15 45.076223 66.132237 18.887108 107 T A 70 -0.50000 -0.50000 "THR " " O  " "    " 8 0 0 0 FF2F2F  O1247  1 <> 1 0 0 0 0 0 0 <> <> 0 1250 <> 0 0 1 <> <> <> <> <>
  1251 3 43.711784 67.095087 16.102027 107 T A 2 0.20500 0.20500 "THR " " CB " "    " 6 0 0 0 A0A0A0  C1248  1 <> 1 0 0 0 0 0 0 <> <> 0 1251 <> 0 0 1 <> <> <> <> <>
  1252 16 42.503247 67.357684 15.417738 107 T A 70 -0.68300 -0.68300 "THR " " OG1" "    " 8 0 0 0 FF2F2F  O1249  1 <> 1 0 0 0 0 0 0 <> <> 0 1252 <> 0 0 1 <> <> <> <> <>
  1253 3 44.068560 65.625293 15.864046 107 T A 2 -0.18000 -0.18000 "THR " " CG2" "    " 6 0 0 0 A0A0A0  C1250  1 <> 1 0 0 0 0 0 0 <> <> 0 1253 <> 0 0 1 <> <> <> <> <>
  1254 43 42.777485 69.258960 16.795898 107 T A 21 0.30000 0.30000 "THR " " H  " "    " 1 0 0 0 FFFFFF  H1251  1 <> 1 0 0 0 0 0 0 <> <> 0 1254 <> 0 0 1 <> <> <> <> <>
  1255 41 42.757589 66.775359 17.992814 107 T A 21 0.06000 0.06000 "THR " " HA " "    " 1 0 0 0 FFFFFF  H1252  1 <> 1 0 0 0 0 0 0 <> <> 0 1255 <> 0 0 1 <> <> <> <> <>
  1256 41 44.485346 67.713999 15.658573 107 T A 21 0.06000 0.06000 "THR " " HB " "    " 1 0 0 0 FFFFFF  H1253  1 <> 1 0 0 0 0 0 0 <> <> 0 1256 <> 0 0 1 <> <> <> <> <>
  1257 42 41.853457 66.690297 15.650743 107 T A 21 0.41800 0.41800 "THR " " HG1" "    " 1 0 0 0 FFFFFF  H1254  1 <> 1 0 0 0 0 0 0 <> <> 0 1257 <> 0 0 1 <> <> <> <> <>
  1258 41 43.915941 65.342928 14.822505 107 T A 21 0.06000 0.06000 "THR " "1HG2" "    " 1 0 0 0 FFFFFF  H1255  1 <> 1 0 0 0 0 0 0 <> <> 0 1258 <> 0 0 1 <> <> <> <> <>
  1259 41 45.106785 65.418979 16.121444 107 T A 21 0.06000 0.06000 "THR " "2HG2" "    " 1 0 0 0 FFFFFF  H1256  1 <> 1 0 0 0 0 0 0 <> <> 0 1259 <> 0 0 1 <> <> <> <> <>
  1260 41 43.445946 64.981050 16.480601 107 T A 21 0.06000 0.06000 "THR " "3HG2" "    " 1 0 0 0 FFFFFF  H1257  1 <> 1 0 0 0 0 0 0 <> <> 0 1260 <> 0 0 1 <> <> <> <> <>
  1261 25 45.517970 68.333061 18.731627 108 K A 43 -0.50000 -0.50000 "LYS " " N  " "    " 7 0 0 0 5757FF  N1258  1 <> 1 0 0 0 0 0 0 <> <> 0 1261 <> 0 0 1 <> <> <> <> <>
  1262 3 46.634722 68.393185 19.674241 108 K A 2 0.14000 0.14000 "LYS " " CA " "    " 6 0 0 0 A0A0A0  C1259  1 <> 1 0 0 0 0 0 0 <> <> 0 1262 <> 0 0 1 <> <> <> <> <>
  1263 2 46.197130 68.106209 21.128835 108 K A 2 0.50000 0.50000 "LYS " " C  " "    " 6 0 0 0 A0A0A0  C1260  1 <> 1 0 0 0 0 0 0 <> <> 0 1263 <> 0 0 1 <> <> <> <> <>
  1264 15 47.030864 67.732353 21.950980 108 K A 70 -0.50000 -0.50000 "LYS " " O  " "    " 8 0 0 0 FF2F2F  O1261  1 <> 1 0 0 0 0 0 0 <> <> 0 1264 <> 0 0 1 <> <> <> <> <>
  1265 3 47.270594 69.793267 19.547018 108 K A 2 -0.12000 -0.12000 "LYS " " CB " "    " 6 0 0 0 A0A0A0  C1262  1 <> 1 0 0 0 0 0 0 <> <> 0 1265 <> 0 0 1 <> <> <> <> <>
  1266 3 48.618183 69.992060 20.261052 108 K A 2 -0.12000 -0.12000 "LYS " " CG " "    " 6 0 0 0 A0A0A0  C1263  1 <> 1 0 0 0 0 0 0 <> <> 0 1266 <> 0 0 1 <> <> <> <> <>
  1267 3 49.320633 71.259364 19.749502 108 K A 2 -0.12000 -0.12000 "LYS " " CD " "    " 6 0 0 0 A0A0A0  C1264  1 <> 1 0 0 0 0 0 0 <> <> 0 1267 <> 0 0 1 <> <> <> <> <>
  1268 3 50.727033 71.473906 20.327324 108 K A 2 0.19000 0.19000 "LYS " " CE " "    " 6 0 0 0 A0A0A0  C1265  1 <> 1 0 0 0 0 0 0 <> <> 0 1268 <> 0 0 1 <> <> <> <> <>
  1269 32 51.522795 72.359489 19.464092 108 K A 43 -0.30000 -0.30000 "LYS " " NZ " "    " 7 1 0 0 5757FF  N1266  1 <> 1 0 0 0 0 0 0 <> <> 0 1269 <> 0 0 1 <> <> <> <> <>
  1270 43 45.248292 69.204359 18.276902 108 K A 21 0.30000 0.30000 "LYS " " H  " "    " 1 0 0 0 FFFFFF  H1267  1 <> 1 0 0 0 0 0 0 <> <> 0 1270 <> 0 0 1 <> <> <> <> <>
  1271 41 47.365738 67.635817 19.383132 108 K A 21 0.06000 0.06000 "LYS " " HA " "    " 1 0 0 0 FFFFFF  H1268  1 <> 1 0 0 0 0 0 0 <> <> 0 1271 <> 0 0 1 <> <> <> <> <>
  1272 41 47.446993 69.971025 18.486322 108 K A 21 0.06000 0.06000 "LYS " "1HB " "    " 1 0 0 0 FFFFFF  H1269  1 <> 1 0 0 0 0 0 0 <> <> 0 1272 <> 0 0 1 <> <> <> <> <>
  1273 41 46.566304 70.564862 19.863144 108 K A 21 0.06000 0.06000 "LYS " "2HB " "    " 1 0 0 0 FFFFFF  H1270  1 <> 1 0 0 0 0 0 0 <> <> 0 1273 <> 0 0 1 <> <> <> <> <>
  1274 41 48.477482 70.040495 21.341420 108 K A 21 0.06000 0.06000 "LYS " "1HG " "    " 1 0 0 0 FFFFFF  H1271  1 <> 1 0 0 0 0 0 0 <> <> 0 1274 <> 0 0 1 <> <> <> <> <>
  1275 41 49.254467 69.126699 20.066701 108 K A 21 0.06000 0.06000 "LYS " "2HG " "    " 1 0 0 0 FFFFFF  H1272  1 <> 1 0 0 0 0 0 0 <> <> 0 1275 <> 0 0 1 <> <> <> <> <>
  1276 41 49.388332 71.196103 18.663627 108 K A 21 0.06000 0.06000 "LYS " "1HD " "    " 1 0 0 0 FFFFFF  H1273  1 <> 1 0 0 0 0 0 0 <> <> 0 1276 <> 0 0 1 <> <> <> <> <>
  1277 41 48.700955 72.134898 19.951566 108 K A 21 0.06000 0.06000 "LYS " "2HD " "    " 1 0 0 0 FFFFFF  H1274  1 <> 1 0 0 0 0 0 0 <> <> 0 1277 <> 0 0 1 <> <> <> <> <>
  1278 41 50.657157 71.897633 21.329402 108 K A 21 0.06000 0.06000 "LYS " "1HE " "    " 1 0 0 0 FFFFFF  H1275  1 <> 1 0 0 0 0 0 0 <> <> 0 1278 <> 0 0 1 <> <> <> <> <>
  1279 41 51.262608 70.526640 20.412653 108 K A 21 0.06000 0.06000 "LYS " "2HE " "    " 1 0 0 0 FFFFFF  H1276  1 <> 1 0 0 0 0 0 0 <> <> 0 1279 <> 0 0 1 <> <> <> <> <>
  1280 44 52.219190 72.872219 19.974484 108 K A 21 0.33000 0.33000 "LYS " "1HZ " "    " 1 0 0 0 FFFFFF  H1277  1 <> 1 0 0 0 0 0 0 <> <> 0 1280 <> 0 0 1 <> <> <> <> <>
  1281 44 52.045203 71.744320 18.802951 108 K A 21 0.33000 0.33000 "LYS " "2HZ " "    " 1 0 0 0 FFFFFF  H1278  1 <> 1 0 0 0 0 0 0 <> <> 0 1281 <> 0 0 1 <> <> <> <> <>
  1282 44 50.917481 72.988974 18.932973 108 K A 21 0.33000 0.33000 "LYS " "3HZ " "    " 1 0 0 0 FFFFFF  H1279  1 <> 1 0 0 0 0 0 0 <> <> 0 1282 <> 0 0 1 <> <> <> <> <>
  1283 25 44.894680 68.213824 21.451313 109 H A 43 -0.50000 -0.50000 "HIS " " N  " "    " 7 0 0 0 5757FF  N1280  1 <> 1 0 0 0 0 0 0 <> <> 0 1283 <> 0 0 1 <> <> <> <> <>
  1284 3 44.342828 67.714633 22.714472 109 H A 2 0.14000 0.14000 "HIS " " CA " "    " 6 0 0 0 A0A0A0  C1281  1 <> 1 0 0 0 0 0 0 <> <> 0 1284 <> 0 0 1 <> <> <> <> <>
  1285 2 44.150427 66.199940 22.560682 109 H A 2 0.50000 0.50000 "HIS " " C  " "    " 6 0 0 0 A0A0A0  C1282  1 <> 1 0 0 0 0 0 0 <> <> 0 1285 <> 0 0 1 <> <> <> <> <>
  1286 15 44.621441 65.428672 23.386443 109 H A 70 -0.50000 -0.50000 "HIS " " O  " "    " 8 0 0 0 FF2F2F  O1283  1 <> 1 0 0 0 0 0 0 <> <> 0 1286 <> 0 0 1 <> <> <> <> <>
  1287 3 42.920278 68.252927 23.043016 109 H A 2 -0.00500 -0.00500 "HIS " " CB " "    " 6 0 0 0 A0A0A0  C1284  1 <> 1 0 0 0 0 0 0 <> <> 0 1287 <> 0 0 1 <> <> <> <> <>
  1288 2 42.609123 69.724593 22.970994 109 H A 2 0.21500 0.21500 "HIS " " CG " "    " 6 0 0 0 A0A0A0  C1285  1 <> 1 0 0 0 0 0 0 <> <> 0 1288 <> 0 0 1 <> <> <> <> <>
  1289 2 43.157294 70.759531 22.236082 109 H A 2 0.21500 0.21500 "HIS " " CD2" "    " 6 0 0 0 A0A0A0  C1286  1 <> 1 0 0 0 0 0 0 <> <> 0 1289 <> 0 0 1 <> <> <> <> <>
  1290 31 41.483220 70.227604 23.606762 109 H A 43 -0.54000 -0.54000 "HIS " " ND1" "    " 7 1 0 0 5757FF  N1287  1 <> 1 0 0 0 0 0 0 <> <> 0 1290 <> 0 0 1 <> <> <> <> <>
  1291 2 41.301120 71.465570 23.159637 109 H A 2 0.38500 0.38500 "HIS " " CE1" "    " 6 0 0 0 A0A0A0  C1288  1 <> 1 0 0 0 0 0 0 <> <> 0 1291 <> 0 0 1 <> <> <> <> <>
  1292 25 42.299903 71.836886 22.367810 109 H A 43 -0.54000 -0.54000 "HIS " " NE2" "    " 7 0 0 0 5757FF  N1289  1 <> 1 0 0 0 0 0 0 <> <> 0 1292 <> 0 0 1 <> <> <> <> <>
  1293 43 44.246479 68.450929 20.701852 109 H A 21 0.30000 0.30000 "HIS " " H  " "    " 1 0 0 0 FFFFFF  H1290  1 <> 1 0 0 0 0 0 0 <> <> 0 1293 <> 0 0 1 <> <> <> <> <>
  1294 41 45.022015 67.929631 23.542274 109 H A 21 0.06000 0.06000 "HIS " " HA " "    " 1 0 0 0 FFFFFF  H1291  1 <> 1 0 0 0 0 0 0 <> <> 0 1294 <> 0 0 1 <> <> <> <> <>
  1295 41 42.159778 67.797878 22.406366 109 H A 21 0.06000 0.06000 "HIS " "1HB " "    " 1 0 0 0 FFFFFF  H1292  1 <> 1 0 0 0 0 0 0 <> <> 0 1295 <> 0 0 1 <> <> <> <> <>
  1296 41 42.672549 67.922407 24.052883 109 H A 21 0.06000 0.06000 "HIS " "2HB " "    " 1 0 0 0 FFFFFF  H1293  1 <> 1 0 0 0 0 0 0 <> <> 0 1296 <> 0 0 1 <> <> <> <> <>
  1297 41 43.986559 70.793598 21.542155 109 H A 21 0.11500 0.11500 "HIS " " HD2" "    " 1 0 0 0 FFFFFF  H1294  1 <> 1 0 0 0 0 0 0 <> <> 0 1297 <> 0 0 1 <> <> <> <> <>
  1298 44 40.810402 69.671727 24.160326 109 H A 21 0.46000 0.46000 "HIS " " HD1" "    " 1 0 0 0 FFFFFF  H1295  1 <> 1 0 0 0 0 0 0 <> <> 0 1298 <> 0 0 1 <> <> <> <> <>
  1299 41 40.414838 72.059776 23.342949 109 H A 21 0.11500 0.11500 "HIS " " HE1" "    " 1 0 0 0 FFFFFF  H1296  1 <> 1 0 0 0 0 0 0 <> <> 0 1299 <> 0 0 1 <> <> <> <> <>
  1300 43 42.241758 72.612402 21.689973 109 H A 21 0.46000 0.46000 "HIS " " HE2" "    " 1 0 0 0 FFFFFF  H1297  1 <> 1 0 0 0 0 0 0 <> <> 0 1300 <> 0 0 1 <> <> <> <> <>
  1301 25 43.431844 65.798126 21.505349 110 I A 43 -0.50000 -0.50000 "ILE " " N  " "    " 7 0 0 0 5757FF  N1298  1 <> 1 0 0 0 0 0 0 <> <> 0 1301 <> 0 0 1 <> <> <> <> <>
  1302 3 42.849830 64.481641 21.265157 110 I A 2 0.14000 0.14000 "ILE " " CA " "    " 6 0 0 0 A0A0A0  C1299  1 <> 1 0 0 0 0 0 0 <> <> 0 1302 <> 0 0 1 <> <> <> <> <>
  1303 2 43.895582 63.367021 21.276085 110 I A 2 0.50000 0.50000 "ILE " " C  " "    " 6 0 0 0 A0A0A0  C1300  1 <> 1 0 0 0 0 0 0 <> <> 0 1303 <> 0 0 1 <> <> <> <> <>
  1304 15 43.761205 62.413122 22.042550 110 I A 70 -0.50000 -0.50000 "ILE " " O  " "    " 8 0 0 0 FF2F2F  O1301  1 <> 1 0 0 0 0 0 0 <> <> 0 1304 <> 0 0 1 <> <> <> <> <>
  1305 3 42.006848 64.565048 19.966574 110 I A 2 -0.06000 -0.06000 "ILE " " CB " "    " 6 0 0 0 A0A0A0  C1302  1 <> 1 0 0 0 0 0 0 <> <> 0 1305 <> 0 0 1 <> <> <> <> <>
  1306 3 41.599388 63.193370 19.392378 110 I A 2 -0.18000 -0.18000 "ILE " " CG2" "    " 6 0 0 0 A0A0A0  C1303  1 <> 1 0 0 0 0 0 0 <> <> 0 1306 <> 0 0 1 <> <> <> <> <>
  1307 3 40.779068 65.475092 20.229743 110 I A 2 -0.12000 -0.12000 "ILE " " CG1" "    " 6 0 0 0 A0A0A0  C1304  1 <> 1 0 0 0 0 0 0 <> <> 0 1307 <> 0 0 1 <> <> <> <> <>
  1308 3 40.005962 65.935153 18.999343 110 I A 2 -0.18000 -0.18000 "ILE " " CD1" "    " 6 0 0 0 A0A0A0  C1305  1 <> 1 0 0 0 0 0 0 <> <> 0 1308 <> 0 0 1 <> <> <> <> <>
  1309 43 43.164529 66.504943 20.835372 110 I A 21 0.30000 0.30000 "ILE " " H  " "    " 1 0 0 0 FFFFFF  H1306  1 <> 1 0 0 0 0 0 0 <> <> 0 1309 <> 0 0 1 <> <> <> <> <>
  1310 41 42.178203 64.257608 22.092766 110 I A 21 0.06000 0.06000 "ILE " " HA " "    " 1 0 0 0 FFFFFF  H1307  1 <> 1 0 0 0 0 0 0 <> <> 0 1310 <> 0 0 1 <> <> <> <> <>
  1311 41 42.625007 65.022053 19.198837 110 I A 21 0.06000 0.06000 "ILE " " HB " "    " 1 0 0 0 FFFFFF  H1308  1 <> 1 0 0 0 0 0 0 <> <> 0 1311 <> 0 0 1 <> <> <> <> <>
  1312 41 40.995853 63.310665 18.495999 110 I A 21 0.06000 0.06000 "ILE " "1HG2" "    " 1 0 0 0 FFFFFF  H1309  1 <> 1 0 0 0 0 0 0 <> <> 0 1312 <> 0 0 1 <> <> <> <> <>
  1313 41 42.463899 62.604410 19.085798 110 I A 21 0.06000 0.06000 "ILE " "2HG2" "    " 1 0 0 0 FFFFFF  H1310  1 <> 1 0 0 0 0 0 0 <> <> 0 1313 <> 0 0 1 <> <> <> <> <>
  1314 41 41.036928 62.601775 20.113307 110 I A 21 0.06000 0.06000 "ILE " "3HG2" "    " 1 0 0 0 FFFFFF  H1311  1 <> 1 0 0 0 0 0 0 <> <> 0 1314 <> 0 0 1 <> <> <> <> <>
  1315 41 40.090311 64.952487 20.886029 110 I A 21 0.06000 0.06000 "ILE " "1HG1" "    " 1 0 0 0 FFFFFF  H1312  1 <> 1 0 0 0 0 0 0 <> <> 0 1315 <> 0 0 1 <> <> <> <> <>
  1316 41 41.062590 66.377030 20.769431 110 I A 21 0.06000 0.06000 "ILE " "2HG1" "    " 1 0 0 0 FFFFFF  H1313  1 <> 1 0 0 0 0 0 0 <> <> 0 1316 <> 0 0 1 <> <> <> <> <>
  1317 41 39.148801 66.533381 19.303969 110 I A 21 0.06000 0.06000 "ILE " "1HD1" "    " 1 0 0 0 FFFFFF  H1314  1 <> 1 0 0 0 0 0 0 <> <> 0 1317 <> 0 0 1 <> <> <> <> <>
  1318 41 40.609154 66.558098 18.343739 110 I A 21 0.06000 0.06000 "ILE " "2HD1" "    " 1 0 0 0 FFFFFF  H1315  1 <> 1 0 0 0 0 0 0 <> <> 0 1318 <> 0 0 1 <> <> <> <> <>
  1319 41 39.636721 65.089930 18.424172 110 I A 21 0.06000 0.06000 "ILE " "3HD1" "    " 1 0 0 0 FFFFFF  H1316  1 <> 1 0 0 0 0 0 0 <> <> 0 1319 <> 0 0 1 <> <> <> <> <>
  1320 25 44.965540 63.513371 20.488672 111 L A 43 -0.50000 -0.50000 "LEU " " N  " "    " 7 0 0 0 5757FF  N1317  1 <> 1 0 0 0 0 0 0 <> <> 0 1320 <> 0 0 1 <> <> <> <> <>
  1321 3 46.031494 62.519090 20.434252 111 L A 2 0.14000 0.14000 "LEU " " CA " "    " 6 0 0 0 A0A0A0  C1318  1 <> 1 0 0 0 0 0 0 <> <> 0 1321 <> 0 0 1 <> <> <> <> <>
  1322 2 46.861053 62.517510 21.732924 111 L A 2 0.50000 0.50000 "LEU " " C  " "    " 6 0 0 0 A0A0A0  C1319  1 <> 1 0 0 0 0 0 0 <> <> 0 1322 <> 0 0 1 <> <> <> <> <>
  1323 15 47.283576 61.456049 22.182458 111 L A 70 -0.50000 -0.50000 "LEU " " O  " "    " 8 0 0 0 FF2F2F  O1320  1 <> 1 0 0 0 0 0 0 <> <> 0 1323 <> 0 0 1 <> <> <> <> <>
  1324 3 46.927941 62.786694 19.213111 111 L A 2 -0.12000 -0.12000 "LEU " " CB " "    " 6 0 0 0 A0A0A0  C1321  1 <> 1 0 0 0 0 0 0 <> <> 0 1324 <> 0 0 1 <> <> <> <> <>
  1325 3 46.260115 62.487167 17.853050 111 L A 2 -0.06000 -0.06000 "LEU " " CG " "    " 6 0 0 0 A0A0A0  C1322  1 <> 1 0 0 0 0 0 0 <> <> 0 1325 <> 0 0 1 <> <> <> <> <>
  1326 3 47.052366 63.125267 16.704416 111 L A 2 -0.18000 -0.18000 "LEU " " CD1" "    " 6 0 0 0 A0A0A0  C1323  1 <> 1 0 0 0 0 0 0 <> <> 0 1326 <> 0 0 1 <> <> <> <> <>
  1327 3 46.115754 60.973198 17.615244 111 L A 2 -0.18000 -0.18000 "LEU " " CD2" "    " 6 0 0 0 A0A0A0  C1324  1 <> 1 0 0 0 0 0 0 <> <> 0 1327 <> 0 0 1 <> <> <> <> <>
  1328 43 45.021714 64.327921 19.883629 111 L A 21 0.30000 0.30000 "LEU " " H  " "    " 1 0 0 0 FFFFFF  H1325  1 <> 1 0 0 0 0 0 0 <> <> 0 1328 <> 0 0 1 <> <> <> <> <>
  1329 41 45.585883 61.528646 20.338098 111 L A 21 0.06000 0.06000 "LEU " " HA " "    " 1 0 0 0 FFFFFF  H1326  1 <> 1 0 0 0 0 0 0 <> <> 0 1329 <> 0 0 1 <> <> <> <> <>
  1330 41 47.276734 63.820997 19.241988 111 L A 21 0.06000 0.06000 "LEU " "1HB " "    " 1 0 0 0 FFFFFF  H1327  1 <> 1 0 0 0 0 0 0 <> <> 0 1330 <> 0 0 1 <> <> <> <> <>
  1331 41 47.818150 62.162910 19.288123 111 L A 21 0.06000 0.06000 "LEU " "2HB " "    " 1 0 0 0 FFFFFF  H1328  1 <> 1 0 0 0 0 0 0 <> <> 0 1331 <> 0 0 1 <> <> <> <> <>
  1332 41 45.263777 62.932417 17.836852 111 L A 21 0.06000 0.06000 "LEU " " HG " "    " 1 0 0 0 FFFFFF  H1329  1 <> 1 0 0 0 0 0 0 <> <> 0 1332 <> 0 0 1 <> <> <> <> <>
  1333 41 46.568937 62.944020 15.743690 111 L A 21 0.06000 0.06000 "LEU " "1HD1" "    " 1 0 0 0 FFFFFF  H1330  1 <> 1 0 0 0 0 0 0 <> <> 0 1333 <> 0 0 1 <> <> <> <> <>
  1334 41 47.132921 64.205238 16.829045 111 L A 21 0.06000 0.06000 "LEU " "2HD1" "    " 1 0 0 0 FFFFFF  H1331  1 <> 1 0 0 0 0 0 0 <> <> 0 1334 <> 0 0 1 <> <> <> <> <>
  1335 41 48.062269 62.720516 16.647131 111 L A 21 0.06000 0.06000 "LEU " "3HD1" "    " 1 0 0 0 FFFFFF  H1332  1 <> 1 0 0 0 0 0 0 <> <> 0 1335 <> 0 0 1 <> <> <> <> <>
  1336 41 45.716995 60.768103 16.622726 111 L A 21 0.06000 0.06000 "LEU " "1HD2" "    " 1 0 0 0 FFFFFF  H1333  1 <> 1 0 0 0 0 0 0 <> <> 0 1336 <> 0 0 1 <> <> <> <> <>
  1337 41 47.075530 60.460293 17.687048 111 L A 21 0.06000 0.06000 "LEU " "2HD2" "    " 1 0 0 0 FFFFFF  H1334  1 <> 1 0 0 0 0 0 0 <> <> 0 1337 <> 0 0 1 <> <> <> <> <>
  1338 41 45.432249 60.509630 18.325783 111 L A 21 0.06000 0.06000 "LEU " "3HD2" "    " 1 0 0 0 FFFFFF  H1335  1 <> 1 0 0 0 0 0 0 <> <> 0 1338 <> 0 0 1 <> <> <> <> <>
  1339 25 47.019992 63.668143 22.403708 112 S A 43 -0.50000 -0.50000 "SER " " N  " "    " 7 0 0 0 5757FF  N1336  1 <> 1 0 0 0 0 0 0 <> <> 0 1339 <> 0 0 1 <> <> <> <> <>
  1340 3 47.693728 63.754825 23.700720 112 S A 2 0.14000 0.14000 "SER " " CA " "    " 6 0 0 0 A0A0A0  C1337  1 <> 1 0 0 0 0 0 0 <> <> 0 1340 <> 0 0 1 <> <> <> <> <>
  1341 2 46.846281 63.105960 24.815662 112 S A 2 0.50000 0.50000 "SER " " C  " "    " 6 0 0 0 A0A0A0  C1338  1 <> 1 0 0 0 0 0 0 <> <> 0 1341 <> 0 0 1 <> <> <> <> <>
  1342 15 47.406322 62.506846 25.733488 112 S A 70 -0.50000 -0.50000 "SER " " O  " "    " 8 0 0 0 FF2F2F  O1339  1 <> 1 0 0 0 0 0 0 <> <> 0 1342 <> 0 0 1 <> <> <> <> <>
  1343 3 48.002034 65.234709 24.027308 112 S A 2 0.14500 0.14500 "SER " " CB " "    " 6 0 0 0 A0A0A0  C1340  1 <> 1 0 0 0 0 0 0 <> <> 0 1343 <> 0 0 1 <> <> <> <> <>
  1344 16 48.885894 65.351259 25.131525 112 S A 70 -0.68300 -0.68300 "SER " " OG " "    " 8 0 0 0 FF2F2F  O1341  1 <> 1 0 0 0 0 0 0 <> <> 0 1344 <> 0 0 1 <> <> <> <> <>
  1345 43 46.597516 64.502435 22.022902 112 S A 21 0.30000 0.30000 "SER " " H  " "    " 1 0 0 0 FFFFFF  H1342  1 <> 1 0 0 0 0 0 0 <> <> 0 1345 <> 0 0 1 <> <> <> <> <>
  1346 41 48.633516 63.203977 23.634252 112 S A 21 0.06000 0.06000 "SER " " HA " "    " 1 0 0 0 FFFFFF  H1343  1 <> 1 0 0 0 0 0 0 <> <> 0 1346 <> 0 0 1 <> <> <> <> <>
  1347 41 48.470247 65.722635 23.172042 112 S A 21 0.06000 0.06000 "SER " "1HB " "    " 1 0 0 0 FFFFFF  H1344  1 <> 1 0 0 0 0 0 0 <> <> 0 1347 <> 0 0 1 <> <> <> <> <>
  1348 41 47.089067 65.793686 24.237623 112 S A 21 0.06000 0.06000 "SER " "2HB " "    " 1 0 0 0 FFFFFF  H1345  1 <> 1 0 0 0 0 0 0 <> <> 0 1348 <> 0 0 1 <> <> <> <> <>
  1349 42 48.445526 65.014337 25.900870 112 S A 21 0.41800 0.41800 "SER " " HG " "    " 1 0 0 0 FFFFFF  H1346  1 <> 1 0 0 0 0 0 0 <> <> 0 1349 <> 0 0 1 <> <> <> <> <>
  1350 25 45.511665 63.190329 24.717857 113 N A 43 -0.50000 -0.50000 "ASN " " N  " "    " 7 0 0 0 5757FF  N1347  1 <> 1 0 0 0 0 0 0 <> <> 0 1350 <> 0 0 1 <> <> <> <> <>
  1351 3 44.558129 62.539770 25.614644 113 N A 2 0.14000 0.14000 "ASN " " CA " "    " 6 0 0 0 A0A0A0  C1348  1 <> 1 0 0 0 0 0 0 <> <> 0 1351 <> 0 0 1 <> <> <> <> <>
  1352 2 44.495338 61.037813 25.324894 113 N A 2 0.50000 0.50000 "ASN " " C  " "    " 6 0 0 0 A0A0A0  C1349  1 <> 1 0 0 0 0 0 0 <> <> 0 1352 <> 0 0 1 <> <> <> <> <>
  1353 15 44.496384 60.247042 26.261829 113 N A 70 -0.50000 -0.50000 "ASN " " O  " "    " 8 0 0 0 FF2F2F  O1350  1 <> 1 0 0 0 0 0 0 <> <> 0 1353 <> 0 0 1 <> <> <> <> <>
  1354 3 43.135261 63.144279 25.478515 113 N A 2 -0.12000 -0.12000 "ASN " " CB " "    " 6 0 0 0 A0A0A0  C1351  1 <> 1 0 0 0 0 0 0 <> <> 0 1354 <> 0 0 1 <> <> <> <> <>
  1355 2 43.005576 64.543065 26.086411 113 N A 2 0.50000 0.50000 "ASN " " CG " "    " 6 0 0 0 A0A0A0  C1352  1 <> 1 0 0 0 0 0 0 <> <> 0 1355 <> 0 0 1 <> <> <> <> <>
  1356 15 43.642992 64.855387 27.087777 113 N A 70 -0.50000 -0.50000 "ASN " " OD1" "    " 8 0 0 0 FF2F2F  O1353  1 <> 1 0 0 0 0 0 0 <> <> 0 1356 <> 0 0 1 <> <> <> <> <>
  1357 25 42.182322 65.415826 25.522491 113 N A 43 -0.76000 -0.76000 "ASN " " ND2" "    " 7 0 0 0 5757FF  N1354  1 <> 1 0 0 0 0 0 0 <> <> 0 1357 <> 0 0 1 <> <> <> <> <>
  1358 43 45.135321 63.783484 23.981975 113 N A 21 0.30000 0.30000 "ASN " " H  " "    " 1 0 0 0 FFFFFF  H1355  1 <> 1 0 0 0 0 0 0 <> <> 0 1358 <> 0 0 1 <> <> <> <> <>
  1359 41 44.909536 62.650643 26.641878 113 N A 21 0.06000 0.06000 "ASN " " HA " "    " 1 0 0 0 FFFFFF  H1356  1 <> 1 0 0 0 0 0 0 <> <> 0 1359 <> 0 0 1 <> <> <> <> <>
  1360 41 42.823010 63.163639 24.433857 113 N A 21 0.06000 0.06000 "ASN " "1HB " "    " 1 0 0 0 FFFFFF  H1357  1 <> 1 0 0 0 0 0 0 <> <> 0 1360 <> 0 0 1 <> <> <> <> <>
  1361 41 42.415266 62.511714 26.000903 113 N A 21 0.06000 0.06000 "ASN " "2HB " "    " 1 0 0 0 FFFFFF  H1358  1 <> 1 0 0 0 0 0 0 <> <> 0 1361 <> 0 0 1 <> <> <> <> <>
  1362 43 42.078627 66.320040 25.945555 113 N A 21 0.38000 0.38000 "ASN " "1HD2" "    " 1 0 0 0 FFFFFF  H1359  1 <> 1 0 0 0 0 0 0 <> <> 0 1362 <> 0 0 1 <> <> <> <> <>
  1363 43 41.575682 65.151820 24.738198 113 N A 21 0.38000 0.38000 "ASN " "2HD2" "    " 1 0 0 0 FFFFFF  H1360  1 <> 1 0 0 0 0 0 0 <> <> 0 1363 <> 0 0 1 <> <> <> <> <>
  1364 25 44.525246 60.621256 24.049625 114 A A 43 -0.50000 -0.50000 "ALA " " N  " "    " 7 0 0 0 5757FF  N1361  1 <> 1 0 0 0 0 0 0 <> <> 0 1364 <> 0 0 1 <> <> <> <> <>
  1365 3 44.642066 59.218115 23.643355 114 A A 2 0.14000 0.14000 "ALA " " CA " "    " 6 0 0 0 A0A0A0  C1362  1 <> 1 0 0 0 0 0 0 <> <> 0 1365 <> 0 0 1 <> <> <> <> <>
  1366 2 45.927655 58.581021 24.194518 114 A A 2 0.50000 0.50000 "ALA " " C  " "    " 6 0 0 0 A0A0A0  C1363  1 <> 1 0 0 0 0 0 0 <> <> 0 1366 <> 0 0 1 <> <> <> <> <>
  1367 15 45.878083 57.496856 24.766350 114 A A 70 -0.50000 -0.50000 "ALA " " O  " "    " 8 0 0 0 FF2F2F  O1364  1 <> 1 0 0 0 0 0 0 <> <> 0 1367 <> 0 0 1 <> <> <> <> <>
  1368 3 44.587846 59.100542 22.113108 114 A A 2 -0.18000 -0.18000 "ALA " " CB " "    " 6 0 0 0 A0A0A0  C1365  1 <> 1 0 0 0 0 0 0 <> <> 0 1368 <> 0 0 1 <> <> <> <> <>
  1369 43 44.471009 61.322323 23.313037 114 A A 21 0.30000 0.30000 "ALA " " H  " "    " 1 0 0 0 FFFFFF  H1366  1 <> 1 0 0 0 0 0 0 <> <> 0 1369 <> 0 0 1 <> <> <> <> <>
  1370 41 43.797694 58.674649 24.069824 114 A A 21 0.06000 0.06000 "ALA " " HA " "    " 1 0 0 0 FFFFFF  H1367  1 <> 1 0 0 0 0 0 0 <> <> 0 1370 <> 0 0 1 <> <> <> <> <>
  1371 41 44.570752 58.053229 21.807898 114 A A 21 0.06000 0.06000 "ALA " "1HB " "    " 1 0 0 0 FFFFFF  H1368  1 <> 1 0 0 0 0 0 0 <> <> 0 1371 <> 0 0 1 <> <> <> <> <>
  1372 41 43.689908 59.568174 21.707864 114 A A 21 0.06000 0.06000 "ALA " "2HB " "    " 1 0 0 0 FFFFFF  H1369  1 <> 1 0 0 0 0 0 0 <> <> 0 1372 <> 0 0 1 <> <> <> <> <>
  1373 41 45.451749 59.562942 21.637463 114 A A 21 0.06000 0.06000 "ALA " "3HB " "    " 1 0 0 0 FFFFFF  H1370  1 <> 1 0 0 0 0 0 0 <> <> 0 1373 <> 0 0 1 <> <> <> <> <>
  1374 25 47.056661 59.299901 24.142427 115 L A 43 -0.50000 -0.50000 "LEU " " N  " "    " 7 0 0 0 5757FF  N1371  1 <> 1 0 0 0 0 0 0 <> <> 0 1374 <> 0 0 1 <> <> <> <> <>
  1375 3 48.328145 58.917339 24.758749 115 L A 2 0.14000 0.14000 "LEU " " CA " "    " 6 0 0 0 A0A0A0  C1372  1 <> 1 0 0 0 0 0 0 <> <> 0 1375 <> 0 0 1 <> <> <> <> <>
  1376 2 48.364040 59.120221 26.299683 115 L A 2 0.50000 0.50000 "LEU " " C  " "    " 6 0 0 0 A0A0A0  C1373  1 <> 1 0 0 0 0 0 0 <> <> 0 1376 <> 0 0 1 <> <> <> <> <>
  1377 15 49.441306 59.059791 26.901166 115 L A 70 -0.50000 -0.50000 "LEU " " O  " "    " 8 0 0 0 FF2F2F  O1374  1 <> 1 0 0 0 0 0 0 <> <> 0 1377 <> 0 0 1 <> <> <> <> <>
  1378 3 49.501630 59.639338 24.040875 115 L A 2 -0.12000 -0.12000 "LEU " " CB " "    " 6 0 0 0 A0A0A0  C1375  1 <> 1 0 0 0 0 0 0 <> <> 0 1378 <> 0 0 1 <> <> <> <> <>
  1379 3 50.027561 58.890914 22.788382 115 L A 2 -0.06000 -0.06000 "LEU " " CG " "    " 6 0 0 0 A0A0A0  C1376  1 <> 1 0 0 0 0 0 0 <> <> 0 1379 <> 0 0 1 <> <> <> <> <>
  1380 3 49.112882 59.011360 21.559510 115 L A 2 -0.18000 -0.18000 "LEU " " CD1" "    " 6 0 0 0 A0A0A0  C1377  1 <> 1 0 0 0 0 0 0 <> <> 0 1380 <> 0 0 1 <> <> <> <> <>
  1381 3 51.448529 59.339113 22.414175 115 L A 2 -0.18000 -0.18000 "LEU " " CD2" "    " 6 0 0 0 A0A0A0  C1378  1 <> 1 0 0 0 0 0 0 <> <> 0 1381 <> 0 0 1 <> <> <> <> <>
  1382 43 47.033262 60.170605 23.618264 115 L A 21 0.30000 0.30000 "LEU " " H  " "    " 1 0 0 0 FFFFFF  H1379  1 <> 1 0 0 0 0 0 0 <> <> 0 1382 <> 0 0 1 <> <> <> <> <>
  1383 41 48.463649 57.844298 24.626230 115 L A 21 0.06000 0.06000 "LEU " " HA " "    " 1 0 0 0 FFFFFF  H1380  1 <> 1 0 0 0 0 0 0 <> <> 0 1383 <> 0 0 1 <> <> <> <> <>
  1384 41 49.242962 60.671459 23.803100 115 L A 21 0.06000 0.06000 "LEU " "1HB " "    " 1 0 0 0 FFFFFF  H1381  1 <> 1 0 0 0 0 0 0 <> <> 0 1384 <> 0 0 1 <> <> <> <> <>
  1385 41 50.342566 59.708822 24.726517 115 L A 21 0.06000 0.06000 "LEU " "2HB " "    " 1 0 0 0 FFFFFF  H1382  1 <> 1 0 0 0 0 0 0 <> <> 0 1385 <> 0 0 1 <> <> <> <> <>
  1386 41 50.093942 57.833162 23.043835 115 L A 21 0.06000 0.06000 "LEU " " HG " "    " 1 0 0 0 FFFFFF  H1383  1 <> 1 0 0 0 0 0 0 <> <> 0 1386 <> 0 0 1 <> <> <> <> <>
  1387 41 49.461801 58.376924 20.745872 115 L A 21 0.06000 0.06000 "LEU " "1HD1" "    " 1 0 0 0 FFFFFF  H1384  1 <> 1 0 0 0 0 0 0 <> <> 0 1387 <> 0 0 1 <> <> <> <> <>
  1388 41 48.088025 58.713644 21.772463 115 L A 21 0.06000 0.06000 "LEU " "2HD1" "    " 1 0 0 0 FFFFFF  H1385  1 <> 1 0 0 0 0 0 0 <> <> 0 1388 <> 0 0 1 <> <> <> <> <>
  1389 41 49.095661 60.029307 21.173384 115 L A 21 0.06000 0.06000 "LEU " "3HD1" "    " 1 0 0 0 FFFFFF  H1386  1 <> 1 0 0 0 0 0 0 <> <> 0 1389 <> 0 0 1 <> <> <> <> <>
  1390 41 51.821027 58.784040 21.552085 115 L A 21 0.06000 0.06000 "LEU " "1HD2" "    " 1 0 0 0 FFFFFF  H1387  1 <> 1 0 0 0 0 0 0 <> <> 0 1390 <> 0 0 1 <> <> <> <> <>
  1391 41 51.482443 60.398858 22.160121 115 L A 21 0.06000 0.06000 "LEU " "2HD2" "    " 1 0 0 0 FFFFFF  H1388  1 <> 1 0 0 0 0 0 0 <> <> 0 1391 <> 0 0 1 <> <> <> <> <>
  1392 41 52.149649 59.160920 23.226333 115 L A 21 0.06000 0.06000 "LEU " "3HD2" "    " 1 0 0 0 FFFFFF  H1389  1 <> 1 0 0 0 0 0 0 <> <> 0 1392 <> 0 0 1 <> <> <> <> <>
  1393 25 47.210058 59.261583 26.966895 116 R A 43 -0.50000 -0.50000 "ARG " " N  " "    " 7 0 0 0 5757FF  N1390  1 <> 1 0 0 0 0 0 0 <> <> 0 1393 <> 0 0 1 <> <> <> <> <>
  1394 3 47.034058 58.835015 28.354149 116 R A 2 0.14000 0.14000 "ARG " " CA " "    " 6 0 0 0 A0A0A0  C1391  1 <> 1 0 0 0 0 0 0 <> <> 0 1394 <> 0 0 1 <> <> <> <> <>
  1395 2 46.557085 57.368304 28.315461 116 R A 2 0.50000 0.50000 "ARG " " C  " "    " 6 0 0 0 A0A0A0  C1392  1 <> 1 0 0 0 0 0 0 <> <> 0 1395 <> 0 0 1 <> <> <> <> <>
  1396 15 47.259967 56.476948 28.779893 116 R A 70 -0.50000 -0.50000 "ARG " " O  " "    " 8 0 0 0 FF2F2F  O1393  1 <> 1 0 0 0 0 0 0 <> <> 0 1396 <> 0 0 1 <> <> <> <> <>
  1397 3 45.992397 59.724782 29.086231 116 R A 2 -0.12000 -0.12000 "ARG " " CB " "    " 6 0 0 0 A0A0A0  C1394  1 <> 1 0 0 0 0 0 0 <> <> 0 1397 <> 0 0 1 <> <> <> <> <>
  1398 3 45.731665 59.262299 30.530440 116 R A 2 -0.05000 -0.05000 "ARG " " CG " "    " 6 0 0 0 A0A0A0  C1395  1 <> 1 0 0 0 0 0 0 <> <> 0 1398 <> 0 0 1 <> <> <> <> <>
  1399 3 44.608836 59.985256 31.280707 116 R A 2 0.19000 0.19000 "ARG " " CD " "    " 6 0 0 0 A0A0A0  C1396  1 <> 1 0 0 0 0 0 0 <> <> 0 1399 <> 0 0 1 <> <> <> <> <>
  1400 25 43.981698 59.066213 32.241737 116 R A 43 -0.69997 -0.69997 "ARG " " NE " "    " 7 0 0 0 5757FF  N1397  1 <> 1 0 0 0 0 0 0 <> <> 0 1400 <> 0 0 1 <> <> <> <> <>
  1401 2 42.678855 59.069710 32.569681 116 R A 2 0.63990 0.63990 "ARG " " CZ " "    " 6 0 0 0 A0A0A0  C1398  1 <> 1 0 0 0 0 0 0 <> <> 0 1401 <> 0 0 1 <> <> <> <> <>
  1402 25 41.894583 60.093814 32.239750 116 R A 43 -0.79997 -0.79997 "ARG " " NH1" "    " 7 0 0 0 5757FF  N1399  1 <> 1 0 0 0 0 0 0 <> <> 0 1402 <> 0 0 1 <> <> <> <> <>
  1403 31 42.132099 58.031698 33.202197 116 R A 43 -0.79997 -0.79997 "ARG " " NH2" "    " 7 1 0 0 5757FF  N1400  1 <> 1 0 0 0 0 0 0 <> <> 0 1403 <> 0 0 1 <> <> <> <> <>
  1404 43 46.364134 59.360712 26.417039 116 R A 21 0.30000 0.30000 "ARG " " H  " "    " 1 0 0 0 FFFFFF  H1401  1 <> 1 0 0 0 0 0 0 <> <> 0 1404 <> 0 0 1 <> <> <> <> <>
  1405 41 47.974538 58.877260 28.907082 116 R A 21 0.06000 0.06000 "ARG " " HA " "    " 1 0 0 0 FFFFFF  H1402  1 <> 1 0 0 0 0 0 0 <> <> 0 1405 <> 0 0 1 <> <> <> <> <>
  1406 41 46.329423 60.761103 29.087526 116 R A 21 0.06000 0.06000 "ARG " "1HB " "    " 1 0 0 0 FFFFFF  H1403  1 <> 1 0 0 0 0 0 0 <> <> 0 1406 <> 0 0 1 <> <> <> <> <>
  1407 41 45.038962 59.709736 28.563091 116 R A 21 0.06000 0.06000 "ARG " "2HB " "    " 1 0 0 0 FFFFFF  H1404  1 <> 1 0 0 0 0 0 0 <> <> 0 1407 <> 0 0 1 <> <> <> <> <>
  1408 41 45.446383 58.213550 30.498686 116 R A 21 0.06000 0.06000 "ARG " "1HG " "    " 1 0 0 0 FFFFFF  H1405  1 <> 1 0 0 0 0 0 0 <> <> 0 1408 <> 0 0 1 <> <> <> <> <>
  1409 41 46.654750 59.313095 31.110079 116 R A 21 0.06000 0.06000 "ARG " "2HG " "    " 1 0 0 0 FFFFFF  H1406  1 <> 1 0 0 0 0 0 0 <> <> 0 1409 <> 0 0 1 <> <> <> <> <>
  1410 41 44.957841 60.891138 31.776372 116 R A 21 0.06000 0.06000 "ARG " "1HD " "    " 1 0 0 0 FFFFFF  H1407  1 <> 1 0 0 0 0 0 0 <> <> 0 1410 <> 0 0 1 <> <> <> <> <>
  1411 41 43.848661 60.269986 30.554856 116 R A 21 0.06000 0.06000 "ARG " "2HD " "    " 1 0 0 0 FFFFFF  H1408  1 <> 1 0 0 0 0 0 0 <> <> 0 1411 <> 0 0 1 <> <> <> <> <>
  1412 43 44.660235 58.345067 32.588852 116 R A 21 0.44000 0.44000 "ARG " " HE " "    " 1 0 0 0 FFFFFF  H1409  1 <> 1 0 0 0 0 0 0 <> <> 0 1412 <> 0 0 1 <> <> <> <> <>
  1413 43 40.841082 60.019026 32.303970 116 R A 21 0.46000 0.46000 "ARG " "1HH1" "    " 1 0 0 0 FFFFFF  H1410  1 <> 1 0 0 0 0 0 0 <> <> 0 1413 <> 0 0 1 <> <> <> <> <>
  1414 43 42.222811 60.925306 31.743709 116 R A 21 0.46000 0.46000 "ARG " "2HH1" "    " 1 0 0 0 FFFFFF  H1411  1 <> 1 0 0 0 0 0 0 <> <> 0 1414 <> 0 0 1 <> <> <> <> <>
  1415 44 41.101989 57.964961 33.260961 116 R A 21 0.46000 0.46000 "ARG " "1HH2" "    " 1 0 0 0 FFFFFF  H1412  1 <> 1 0 0 0 0 0 0 <> <> 0 1415 <> 0 0 1 <> <> <> <> <>
  1416 44 42.677469 57.211389 33.423497 116 R A 21 0.46000 0.46000 "ARG " "2HH2" "    " 1 0 0 0 FFFFFF  H1413  1 <> 1 0 0 0 0 0 0 <> <> 0 1416 <> 0 0 1 <> <> <> <> <>
  1417 25 45.366225 57.109879 27.762693 117 H A 43 -0.50000 -0.50000 "HIS " " N  " "    " 7 0 0 0 5757FF  N1414  1 <> 1 0 0 0 0 0 0 <> <> 0 1417 <> 0 0 1 <> <> <> <> <>
  1418 3 44.670253 55.817587 27.834776 117 H A 2 0.14000 0.14000 "HIS " " CA " "    " 6 0 0 0 A0A0A0  C1415  1 <> 1 0 0 0 0 0 0 <> <> 0 1418 <> 0 0 1 <> <> <> <> <>
  1419 2 45.383859 54.695109 27.074267 117 H A 2 0.50000 0.50000 "HIS " " C  " "    " 6 0 0 0 A0A0A0  C1416  1 <> 1 0 0 0 0 0 0 <> <> 0 1419 <> 0 0 1 <> <> <> <> <>
  1420 15 45.364426 53.550835 27.530335 117 H A 70 -0.50000 -0.50000 "HIS " " O  " "    " 8 0 0 0 FF2F2F  O1417  1 <> 1 0 0 0 0 0 0 <> <> 0 1420 <> 0 0 1 <> <> <> <> <>
  1421 3 43.223586 55.990037 27.358028 117 H A 2 -0.00500 -0.00500 "HIS " " CB " "    " 6 0 0 0 A0A0A0  C1418  1 <> 1 0 0 0 0 0 0 <> <> 0 1421 <> 0 0 1 <> <> <> <> <>
  1422 2 42.511972 57.003502 28.212997 117 H A 2 0.01500 0.01500 "HIS " " CG " "    " 6 0 0 0 A0A0A0  C1419  1 <> 1 0 0 0 0 0 0 <> <> 0 1422 <> 0 0 1 <> <> <> <> <>
  1423 2 42.349164 58.355405 28.035072 117 H A 2 -0.01500 -0.01500 "HIS " " CD2" "    " 6 0 0 0 A0A0A0  C1420  1 <> 1 0 0 0 0 0 0 <> <> 0 1423 <> 0 0 1 <> <> <> <> <>
  1424 25 41.992734 56.733334 29.469135 117 H A 43 -0.57000 -0.57000 "HIS " " ND1" "    " 7 0 0 0 5757FF  N1421  1 <> 1 0 0 0 0 0 0 <> <> 0 1424 <> 0 0 1 <> <> <> <> <>
  1425 2 41.500262 57.876177 29.944932 117 H A 2 0.29500 0.29500 "HIS " " CE1" "    " 6 0 0 0 A0A0A0  C1422  1 <> 1 0 0 0 0 0 0 <> <> 0 1425 <> 0 0 1 <> <> <> <> <>
  1426 25 41.723043 58.910385 29.146358 117 H A 43 -0.49000 -0.49000 "HIS " " NE2" "    " 7 0 0 0 5757FF  N1423  1 <> 1 0 0 0 0 0 0 <> <> 0 1426 <> 0 0 1 <> <> <> <> <>
  1427 43 44.835396 57.888924 27.398162 117 H A 21 0.30000 0.30000 "HIS " " H  " "    " 1 0 0 0 FFFFFF  H1424  1 <> 1 0 0 0 0 0 0 <> <> 0 1427 <> 0 0 1 <> <> <> <> <>
  1428 41 44.638294 55.515282 28.881902 117 H A 21 0.06000 0.06000 "HIS " " HA " "    " 1 0 0 0 FFFFFF  H1425  1 <> 1 0 0 0 0 0 0 <> <> 0 1428 <> 0 0 1 <> <> <> <> <>
  1429 41 43.200049 56.326207 26.319572 117 H A 21 0.06000 0.06000 "HIS " "1HB " "    " 1 0 0 0 FFFFFF  H1426  1 <> 1 0 0 0 0 0 0 <> <> 0 1429 <> 0 0 1 <> <> <> <> <>
  1430 41 42.678585 55.045469 27.389460 117 H A 21 0.06000 0.06000 "HIS " "2HB " "    " 1 0 0 0 FFFFFF  H1427  1 <> 1 0 0 0 0 0 0 <> <> 0 1430 <> 0 0 1 <> <> <> <> <>
  1431 41 42.640005 58.969705 27.198489 117 H A 21 0.11500 0.11500 "HIS " " HD2" "    " 1 0 0 0 FFFFFF  H1428  1 <> 1 0 0 0 0 0 0 <> <> 0 1431 <> 0 0 1 <> <> <> <> <>
  1432 43 42.026389 55.862383 30.016024 117 H A 21 0.42000 0.42000 "HIS " " HD1" "    " 1 0 0 0 FFFFFF  H1429  1 <> 1 0 0 0 0 0 0 <> <> 0 1432 <> 0 0 1 <> <> <> <> <>
  1433 41 40.995932 57.958280 30.894614 117 H A 21 0.11500 0.11500 "HIS " " HE1" "    " 1 0 0 0 FFFFFF  H1430  1 <> 1 0 0 0 0 0 0 <> <> 0 1433 <> 0 0 1 <> <> <> <> <>
  1434 25 46.150558 55.025364 26.025796 118 L A 43 -0.50000 -0.50000 "LEU " " N  " "    " 7 0 0 0 5757FF  N1431  1 <> 1 0 0 0 0 0 0 <> <> 0 1434 <> 0 0 1 <> <> <> <> <>
  1435 3 47.176130 54.182443 25.402461 118 L A 2 0.14000 0.14000 "LEU " " CA " "    " 6 0 0 0 A0A0A0  C1432  1 <> 1 0 0 0 0 0 0 <> <> 0 1435 <> 0 0 1 <> <> <> <> <>
  1436 2 48.428099 54.128749 26.319818 118 L A 2 0.50000 0.50000 "LEU " " C  " "    " 6 0 0 0 A0A0A0  C1433  1 <> 1 0 0 0 0 0 0 <> <> 0 1436 <> 0 0 1 <> <> <> <> <>
  1437 15 49.540835 54.502487 25.941268 118 L A 70 -0.50000 -0.50000 "LEU " " O  " "    " 8 0 0 0 FF2F2F  O1434  1 <> 1 0 0 0 0 0 0 <> <> 0 1437 <> 0 0 1 <> <> <> <> <>
  1438 3 47.503823 54.722953 23.986536 118 L A 2 -0.12000 -0.12000 "LEU " " CB " "    " 6 0 0 0 A0A0A0  C1435  1 <> 1 0 0 0 0 0 0 <> <> 0 1438 <> 0 0 1 <> <> <> <> <>
  1439 3 46.297690 54.776515 23.011657 118 L A 2 -0.06000 -0.06000 "LEU " " CG " "    " 6 0 0 0 A0A0A0  C1436  1 <> 1 0 0 0 0 0 0 <> <> 0 1439 <> 0 0 1 <> <> <> <> <>
  1440 3 46.622781 55.588491 21.751061 118 L A 2 -0.18000 -0.18000 "LEU " " CD1" "    " 6 0 0 0 A0A0A0  C1437  1 <> 1 0 0 0 0 0 0 <> <> 0 1440 <> 0 0 1 <> <> <> <> <>
  1441 3 45.798180 53.380282 22.616996 118 L A 2 -0.18000 -0.18000 "LEU " " CD2" "    " 6 0 0 0 A0A0A0  C1438  1 <> 1 0 0 0 0 0 0 <> <> 0 1441 <> 0 0 1 <> <> <> <> <>
  1442 43 46.088926 55.986640 25.693305 118 L A 21 0.30000 0.30000 "LEU " " H  " "    " 1 0 0 0 FFFFFF  H1439  1 <> 1 0 0 0 0 0 0 <> <> 0 1442 <> 0 0 1 <> <> <> <> <>
  1443 41 46.799701 53.170052 25.303679 118 L A 21 0.06000 0.06000 "LEU " " HA " "    " 1 0 0 0 FFFFFF  H1440  1 <> 1 0 0 0 0 0 0 <> <> 0 1443 <> 0 0 1 <> <> <> <> <>
  1444 41 47.936891 55.717640 24.078286 118 L A 21 0.06000 0.06000 "LEU " "1HB " "    " 1 0 0 0 FFFFFF  H1441  1 <> 1 0 0 0 0 0 0 <> <> 0 1444 <> 0 0 1 <> <> <> <> <>
  1445 41 48.280922 54.102667 23.539520 118 L A 21 0.06000 0.06000 "LEU " "2HB " "    " 1 0 0 0 FFFFFF  H1442  1 <> 1 0 0 0 0 0 0 <> <> 0 1445 <> 0 0 1 <> <> <> <> <>
  1446 41 45.468914 55.287322 23.501604 118 L A 21 0.06000 0.06000 "LEU " " HG " "    " 1 0 0 0 FFFFFF  H1443  1 <> 1 0 0 0 0 0 0 <> <> 0 1446 <> 0 0 1 <> <> <> <> <>
  1447 41 45.725930 55.752318 21.154700 118 L A 21 0.06000 0.06000 "LEU " "1HD1" "    " 1 0 0 0 FFFFFF  H1444  1 <> 1 0 0 0 0 0 0 <> <> 0 1447 <> 0 0 1 <> <> <> <> <>
  1448 41 47.030595 56.567929 21.999107 118 L A 21 0.06000 0.06000 "LEU " "2HD1" "    " 1 0 0 0 FFFFFF  H1445  1 <> 1 0 0 0 0 0 0 <> <> 0 1448 <> 0 0 1 <> <> <> <> <>
  1449 41 47.339913 55.068382 21.118005 118 L A 21 0.06000 0.06000 "LEU " "3HD1" "    " 1 0 0 0 FFFFFF  H1446  1 <> 1 0 0 0 0 0 0 <> <> 0 1449 <> 0 0 1 <> <> <> <> <>
  1450 41 44.978261 53.438485 21.900736 118 L A 21 0.06000 0.06000 "LEU " "1HD2" "    " 1 0 0 0 FFFFFF  H1447  1 <> 1 0 0 0 0 0 0 <> <> 0 1450 <> 0 0 1 <> <> <> <> <>
  1451 41 46.590378 52.780637 22.166667 118 L A 21 0.06000 0.06000 "LEU " "2HD2" "    " 1 0 0 0 FFFFFF  H1448  1 <> 1 0 0 0 0 0 0 <> <> 0 1451 <> 0 0 1 <> <> <> <> <>
  1452 41 45.418302 52.844159 23.484236 118 L A 21 0.06000 0.06000 "LEU " "3HD2" "    " 1 0 0 0 FFFFFF  H1449  1 <> 1 0 0 0 0 0 0 <> <> 0 1452 <> 0 0 1 <> <> <> <> <>
  1453 25 48.198957 53.710752 27.568455 119 H A 43 -0.50000 -0.50000 "HIS " " N  " "    " 7 0 0 0 5757FF  N1450  1 <> 1 0 0 0 0 0 0 <> <> 0 1453 <> 0 0 1 <> <> <> <> <>
  1454 3 49.090043 53.495205 28.701651 119 H A 2 0.14000 0.14000 "HIS " " CA " "    " 6 0 0 0 A0A0A0  C1451  1 <> 1 0 0 0 0 0 0 <> <> 0 1454 <> 0 0 1 <> <> <> <> <>
  1455 2 48.228677 53.143358 29.922573 119 H A 2 0.50000 0.50000 "HIS " " C  " "    " 6 0 0 0 A0A0A0  C1452  1 <> 1 0 0 0 0 0 0 <> <> 0 1455 <> 0 0 1 <> <> <> <> <>
  1456 15 48.518276 52.147339 30.578086 119 H A 70 -0.50000 -0.50000 "HIS " " O  " "    " 8 0 0 0 FF2F2F  O1453  1 <> 1 0 0 0 0 0 0 <> <> 0 1456 <> 0 0 1 <> <> <> <> <>
  1457 3 50.005867 54.710431 29.028787 119 H A 2 -0.00500 -0.00500 "HIS " " CB " "    " 6 0 0 0 A0A0A0  C1454  1 <> 1 0 0 0 0 0 0 <> <> 0 1457 <> 0 0 1 <> <> <> <> <>
  1458 2 50.592025 54.703589 30.429973 119 H A 2 0.21500 0.21500 "HIS " " CG " "    " 6 0 0 0 A0A0A0  C1455  1 <> 1 0 0 0 0 0 0 <> <> 0 1458 <> 0 0 1 <> <> <> <> <>
  1459 2 51.649144 53.985195 30.959822 119 H A 2 0.21500 0.21500 "HIS " " CD2" "    " 6 0 0 0 A0A0A0  C1456  1 <> 1 0 0 0 0 0 0 <> <> 0 1459 <> 0 0 1 <> <> <> <> <>
  1460 31 50.017108 55.394780 31.490177 119 H A 43 -0.54000 -0.54000 "HIS " " ND1" "    " 7 1 0 0 5757FF  N1457  1 <> 1 0 0 0 0 0 0 <> <> 0 1460 <> 0 0 1 <> <> <> <> <>
  1461 2 50.655029 55.040851 32.595341 119 H A 2 0.38500 0.38500 "HIS " " CE1" "    " 6 0 0 0 A0A0A0  C1458  1 <> 1 0 0 0 0 0 0 <> <> 0 1461 <> 0 0 1 <> <> <> <> <>
  1462 25 51.682323 54.235952 32.325299 119 H A 43 -0.54000 -0.54000 "HIS " " NE2" "    " 7 0 0 0 5757FF  N1459  1 <> 1 0 0 0 0 0 0 <> <> 0 1462 <> 0 0 1 <> <> <> <> <>
  1463 43 47.229074 53.451779 27.736955 119 H A 21 0.30000 0.30000 "HIS " " H  " "    " 1 0 0 0 FFFFFF  H1460  1 <> 1 0 0 0 0 0 0 <> <> 0 1463 <> 0 0 1 <> <> <> <> <>
  1464 41 49.711367 52.626741 28.477157 119 H A 21 0.06000 0.06000 "HIS " " HA " "    " 1 0 0 0 FFFFFF  H1461  1 <> 1 0 0 0 0 0 0 <> <> 0 1464 <> 0 0 1 <> <> <> <> <>
  1465 41 50.835878 54.717528 28.322694 119 H A 21 0.06000 0.06000 "HIS " "1HB " "    " 1 0 0 0 FFFFFF  H1462  1 <> 1 0 0 0 0 0 0 <> <> 0 1465 <> 0 0 1 <> <> <> <> <>
  1466 41 49.497489 55.657955 28.880858 119 H A 21 0.06000 0.06000 "HIS " "2HB " "    " 1 0 0 0 FFFFFF  H1463  1 <> 1 0 0 0 0 0 0 <> <> 0 1466 <> 0 0 1 <> <> <> <> <>
  1467 41 52.332258 53.283943 30.500283 119 H A 21 0.11500 0.11500 "HIS " " HD2" "    " 1 0 0 0 FFFFFF  H1464  1 <> 1 0 0 0 0 0 0 <> <> 0 1467 <> 0 0 1 <> <> <> <> <>
  1468 44 49.074513 55.904932 31.543954 119 H A 21 0.46000 0.46000 "HIS " " HD1" "    " 1 0 0 0 FFFFFF  H1465  1 <> 1 0 0 0 0 0 0 <> <> 0 1468 <> 0 0 1 <> <> <> <> <>
  1469 41 50.337946 55.340427 33.586969 119 H A 21 0.11500 0.11500 "HIS " " HE1" "    " 1 0 0 0 FFFFFF  H1466  1 <> 1 0 0 0 0 0 0 <> <> 0 1469 <> 0 0 1 <> <> <> <> <>
  1470 43 52.263931 53.775874 33.012252 119 H A 21 0.46000 0.46000 "HIS " " HE2" "    " 1 0 0 0 FFFFFF  H1467  1 <> 1 0 0 0 0 0 0 <> <> 0 1470 <> 0 0 1 <> <> <> <> <>
  1471 25 47.249940 53.992025 30.273533 120 D A 43 -0.50000 -0.50000 "ASP " " N  " "    " 7 0 0 0 5757FF  N1468  1 <> 1 0 0 0 0 0 0 <> <> 0 1471 <> 0 0 1 <> <> <> <> <>
  1472 3 46.526064 53.904331 31.554828 120 D A 2 0.14000 0.14000 "ASP " " CA " "    " 6 0 0 0 A0A0A0  C1469  1 <> 1 0 0 0 0 0 0 <> <> 0 1472 <> 0 0 1 <> <> <> <> <>
  1473 2 45.444923 52.822954 31.540774 120 D A 2 0.50000 0.50000 "ASP " " C  " "    " 6 0 0 0 A0A0A0  C1470  1 <> 1 0 0 0 0 0 0 <> <> 0 1473 <> 0 0 1 <> <> <> <> <>
  1474 15 45.105245 52.303940 32.599272 120 D A 70 -0.50000 -0.50000 "ASP " " O  " "    " 8 0 0 0 FF2F2F  O1471  1 <> 1 0 0 0 0 0 0 <> <> 0 1474 <> 0 0 1 <> <> <> <> <>
  1475 3 45.762219 55.213219 31.889171 120 D A 2 -0.22000 -0.22000 "ASP " " CB " "    " 6 0 0 0 A0A0A0  C1472  1 <> 1 0 0 0 0 0 0 <> <> 0 1475 <> 0 0 1 <> <> <> <> <>
  1476 2 46.591234 56.435465 32.244005 120 D A 2 0.70000 0.70000 "ASP " " CG " "    " 6 0 0 0 A0A0A0  C1473  1 <> 1 0 0 0 0 0 0 <> <> 0 1476 <> 0 0 1 <> <> <> <> <>
  1477 18 47.795204 56.481418 31.891914 120 D A 70 -0.80000 -0.80000 "ASP " " OD1" "    " 8 -1 0 0 FF2F2F  O1474  1 <> 1 0 0 0 0 0 0 <> <> 0 1477 <> 0 0 1 <> <> <> <> <>
  1478 15 45.977283 57.360899 32.820872 120 D A 70 -0.80000 -0.80000 "ASP " " OD2" "    " 8 0 0 0 FF2F2F  O1475  1 <> 1 0 0 0 0 0 0 <> <> 0 1478 <> 0 0 1 <> <> <> <> <>
  1479 43 47.147347 54.857787 29.748168 120 D A 21 0.30000 0.30000 "ASP " " H  " "    " 1 0 0 0 FFFFFF  H1476  1 <> 1 0 0 0 0 0 0 <> <> 0 1479 <> 0 0 1 <> <> <> <> <>
  1480 41 47.225117 53.680465 32.362915 120 D A 21 0.06000 0.06000 "ASP " " HA " "    " 1 0 0 0 FFFFFF  H1477  1 <> 1 0 0 0 0 0 0 <> <> 0 1480 <> 0 0 1 <> <> <> <> <>
  1481 41 45.093559 55.489826 31.076122 120 D A 21 0.06000 0.06000 "ASP " "1HB " "    " 1 0 0 0 FFFFFF  H1478  1 <> 1 0 0 0 0 0 0 <> <> 0 1481 <> 0 0 1 <> <> <> <> <>
  1482 41 45.111731 55.041950 32.749852 120 D A 21 0.06000 0.06000 "ASP " "2HB " "    " 1 0 0 0 FFFFFF  H1479  1 <> 1 0 0 0 0 0 0 <> <> 0 1482 <> 0 0 1 <> <> <> <> <>
  1483 25 44.889033 52.515942 30.364208 121 N A 43 -0.50000 -0.50000 "ASN " " N  " "    " 7 0 0 0 5757FF  N1480  0 <> 1 0 0 0 0 0 0 <> <> 0 1483 <> 0 0 1 <> <> <> <> <>
  1484 3 43.665548 51.730055 30.203615 121 N A 2 0.14000 0.14000 "ASN " " CA " "    " 6 0 0 0 A0A0A0  C1481  0 <> 1 0 0 0 0 0 0 <> <> 0 1484 <> 0 0 1 <> <> <> <> <>
  1485 2 43.840729 50.637742 29.137772 121 N A 2 0.50000 0.50000 "ASN " " C  " "    " 6 0 0 0 A0A0A0  C1482  0 <> 1 0 0 0 0 0 0 <> <> 0 1485 <> 0 0 1 <> <> <> <> <>
  1486 15 43.286365 50.809043 28.052206 121 N A 70 -0.50000 -0.50000 "ASN " " O  " "    " 8 0 0 0 FF2F2F  O1483  0 <> 1 0 0 0 0 0 0 <> <> 0 1486 <> 0 0 1 <> <> <> <> <>
  1487 3 42.493554 52.691742 29.875816 121 N A 2 -0.12000 -0.12000 "ASN " " CB " "    " 6 0 0 0 A0A0A0  C1484  0 <> 1 0 0 0 0 0 0 <> <> 0 1487 <> 0 0 1 <> <> <> <> <>
  1488 2 41.944834 53.442339 31.081102 121 N A 2 0.50000 0.50000 "ASN " " CG " "    " 6 0 0 0 A0A0A0  C1485  0 <> 1 0 0 0 0 0 0 <> <> 0 1488 <> 0 0 1 <> <> <> <> <>
  1489 15 42.183842 54.640303 31.238057 121 N A 70 -0.50000 -0.50000 "ASN " " OD1" "    " 8 0 0 0 FF2F2F  O1486  0 <> 1 0 0 0 0 0 0 <> <> 0 1489 <> 0 0 1 <> <> <> <> <>
  1490 25 41.140024 52.765816 31.883361 121 N A 43 -0.76000 -0.76000 "ASN " " ND2" "    " 7 0 0 0 5757FF  N1487  0 <> 1 0 0 0 0 0 0 <> <> 0 1490 <> 0 0 1 <> <> <> <> <>
  1491 43 45.266622 52.936382 29.527468 121 N A 21 0.30000 0.30000 "ASN " " H  " "    " 1 0 0 0 FFFFFF  H1488  0 <> 1 0 0 0 0 0 0 <> <> 0 1491 <> 0 0 1 <> <> <> <> <>
  1492 41 43.410862 51.198439 31.123758 121 N A 21 0.06000 0.06000 "ASN " " HA " "    " 1 0 0 0 FFFFFF  H1489  0 <> 1 0 0 0 0 0 0 <> <> 0 1492 <> 0 0 1 <> <> <> <> <>
  1493 41 42.789680 53.401012 29.104947 121 N A 21 0.06000 0.06000 "ASN " "1HB " "    " 1 0 0 0 FFFFFF  H1490  0 <> 1 0 0 0 0 0 0 <> <> 0 1493 <> 0 0 1 <> <> <> <> <>
  1494 41 41.662872 52.135869 29.452021 121 N A 21 0.06000 0.06000 "ASN " "2HB " "    " 1 0 0 0 FFFFFF  H1491  0 <> 1 0 0 0 0 0 0 <> <> 0 1494 <> 0 0 1 <> <> <> <> <>
  1495 43 40.702474 53.163092 32.693073 121 N A 21 0.38000 0.38000 "ASN " "1HD2" "    " 1 0 0 0 FFFFFF  H1492  0 <> 1 0 0 0 0 0 0 <> <> 0 1495 <> 0 0 1 <> <> <> <> <>
  1496 43 40.862299 51.803695 31.573301 121 N A 21 0.38000 0.38000 "ASN " "2HD2" "    " 1 0 0 0 FFFFFF  H1493  0 <> 1 0 0 0 0 0 0 <> <> 0 1496 <> 0 0 1 <> <> <> <> <>
  1497 25 44.612771 49.547571 29.381406 122 P A 43 -0.14000 -0.14000 "PRO " " N  " "    " 7 0 0 0 5757FF  N1494  0 <> 1 0 0 0 0 0 0 <> <> 0 1497 <> 0 0 1 <> <> <> <> <>
  1498 3 44.837224 48.438719 28.428594 122 P A 2 0.01000 0.01000 "PRO " " CA " "    " 6 0 0 0 A0A0A0  C1495  0 <> 1 0 0 0 0 0 0 <> <> 0 1498 <> 0 0 1 <> <> <> <> <>
  1499 2 43.580938 47.823592 27.776809 122 P A 2 0.50000 0.50000 "PRO " " C  " "    " 6 0 0 0 A0A0A0  C1496  0 <> 1 0 0 0 0 0 0 <> <> 0 1499 <> 0 0 1 <> <> <> <> <>
  1500 15 43.646530 47.343830 26.644044 122 P A 70 -0.50000 -0.50000 "PRO " " O  " "    " 8 0 0 0 FF2F2F  O1497  0 <> 1 0 0 0 0 0 0 <> <> 0 1500 <> 0 0 1 <> <> <> <> <>
  1501 3 45.372377 49.325232 30.615495 122 P A 2 -0.05000 -0.05000 "PRO " " CD " "    " 6 0 0 0 A0A0A0  C1498  0 <> 1 0 0 0 0 0 0 <> <> 0 1501 <> 0 0 1 <> <> <> <> <>
  1502 3 45.565767 47.352854 29.237412 122 P A 2 -0.12000 -0.12000 "PRO " " CB " "    " 6 0 0 0 A0A0A0  C1499  0 <> 1 0 0 0 0 0 0 <> <> 0 1502 <> 0 0 1 <> <> <> <> <>
  1503 3 46.240606 48.090437 30.378130 122 P A 2 -0.12000 -0.12000 "PRO " " CG " "    " 6 0 0 0 A0A0A0  C1500  0 <> 1 0 0 0 0 0 0 <> <> 0 1503 <> 0 0 1 <> <> <> <> <>
  1504 41 46.001743 50.170812 30.885108 122 P A 21 0.06000 0.06000 "PRO " "1HD " "    " 1 0 0 0 FFFFFF  H1501  0 <> 1 0 0 0 0 0 0 <> <> 0 1504 <> 0 0 1 <> <> <> <> <>
  1505 41 44.668775 49.149704 31.432354 122 P A 21 0.06000 0.06000 "PRO " "2HD " "    " 1 0 0 0 FFFFFF  H1502  0 <> 1 0 0 0 0 0 0 <> <> 0 1505 <> 0 0 1 <> <> <> <> <>
  1506 41 45.491908 48.812315 27.641792 122 P A 21 0.06000 0.06000 "PRO " " HA " "    " 1 0 0 0 FFFFFF  H1503  0 <> 1 0 0 0 0 0 0 <> <> 0 1506 <> 0 0 1 <> <> <> <> <>
  1507 41 44.852980 46.640977 29.659746 122 P A 21 0.06000 0.06000 "PRO " "1HB " "    " 1 0 0 0 FFFFFF  H1504  0 <> 1 0 0 0 0 0 0 <> <> 0 1507 <> 0 0 1 <> <> <> <> <>
  1508 41 46.269218 46.785268 28.627801 122 P A 21 0.06000 0.06000 "PRO " "2HB " "    " 1 0 0 0 FFFFFF  H1505  0 <> 1 0 0 0 0 0 0 <> <> 0 1508 <> 0 0 1 <> <> <> <> <>
  1509 41 47.236364 48.406046 30.064291 122 P A 21 0.06000 0.06000 "PRO " "1HG " "    " 1 0 0 0 FFFFFF  H1506  0 <> 1 0 0 0 0 0 0 <> <> 0 1509 <> 0 0 1 <> <> <> <> <>
  1510 41 46.352804 47.478543 31.273875 122 P A 21 0.06000 0.06000 "PRO " "2HG " "    " 1 0 0 0 FFFFFF  H1507  0 <> 1 0 0 0 0 0 0 <> <> 0 1510 <> 0 0 1 <> <> <> <> <>
  1511 25 42.454720 47.810079 28.495710 123 E A 43 -0.50000 -0.50000 "GLU " " N  " "    " 7 0 0 0 5757FF  N1508  0 <> 1 0 0 0 0 0 0 <> <> 0 1511 <> 0 0 1 <> <> <> <> <>
  1512 3 41.154694 47.318927 28.071553 123 E A 2 0.14000 0.14000 "GLU " " CA " "    " 6 0 0 0 A0A0A0  C1509  0 <> 1 0 0 0 0 0 0 <> <> 0 1512 <> 0 0 1 <> <> <> <> <>
  1513 2 40.480534 48.282343 27.078032 123 E A 2 0.50000 0.50000 "GLU " " C  " "    " 6 0 0 0 A0A0A0  C1510  0 <> 1 0 0 0 0 0 0 <> <> 0 1513 <> 0 0 1 <> <> <> <> <>
  1514 15 39.763016 47.821845 26.188462 123 E A 70 -0.50000 -0.50000 "GLU " " O  " "    " 8 0 0 0 FF2F2F  O1511  0 <> 1 0 0 0 0 0 0 <> <> 0 1514 <> 0 0 1 <> <> <> <> <>
  1515 3 40.290102 47.111781 29.349637 123 E A 2 -0.12000 -0.12000 "GLU " " CB " "    " 6 0 0 0 A0A0A0  C1512  0 <> 1 0 0 0 0 0 0 <> <> 0 1515 <> 0 0 1 <> <> <> <> <>
  1516 3 39.688554 48.355249 30.065098 123 E A 2 -0.22000 -0.22000 "GLU " " CG " "    " 6 0 0 0 A0A0A0  C1513  0 <> 1 0 0 0 0 0 0 <> <> 0 1516 <> 0 0 1 <> <> <> <> <>
  1517 2 40.715177 49.337908 30.625393 123 E A 2 0.70000 0.70000 "GLU " " CD " "    " 6 0 0 0 A0A0A0  C1514  0 <> 1 0 0 0 0 0 0 <> <> 0 1517 <> 0 0 1 <> <> <> <> <>
  1518 18 40.371614 50.528700 30.746075 123 E A 70 -0.80000 -0.80000 "GLU " " OE2" "    " 8 -1 0 0 FF2F2F  O1515  0 <> 1 0 0 0 0 0 0 <> <> 0 1518 <> 0 0 1 <> <> <> <> <>
  1519 15 41.878634 48.932707 30.833831 123 E A 70 -0.80000 -0.80000 "GLU " " OE1" "    " 8 0 0 0 FF2F2F  O1516  0 <> 1 0 0 0 0 0 0 <> <> 0 1519 <> 0 0 1 <> <> <> <> <>
  1520 43 42.449165 48.243513 29.433433 123 E A 21 0.30000 0.30000 "GLU " " H  " "    " 1 0 0 0 FFFFFF  H1517  0 <> 1 0 0 0 0 0 0 <> <> 0 1520 <> 0 0 1 <> <> <> <> <>
  1521 41 41.298184 46.356304 27.578285 123 E A 21 0.06000 0.06000 "GLU " " HA " "    " 1 0 0 0 FFFFFF  H1518  0 <> 1 0 0 0 0 0 0 <> <> 0 1521 <> 0 0 1 <> <> <> <> <>
  1522 41 39.452953 46.469959 29.076847 123 E A 21 0.06000 0.06000 "GLU " "1HB " "    " 1 0 0 0 FFFFFF  H1519  0 <> 1 0 0 0 0 0 0 <> <> 0 1522 <> 0 0 1 <> <> <> <> <>
  1523 41 40.860972 46.533916 30.077913 123 E A 21 0.06000 0.06000 "GLU " "2HB " "    " 1 0 0 0 FFFFFF  H1520  0 <> 1 0 0 0 0 0 0 <> <> 0 1523 <> 0 0 1 <> <> <> <> <>
  1524 41 39.009672 48.898449 29.407887 123 E A 21 0.06000 0.06000 "GLU " "1HG " "    " 1 0 0 0 FFFFFF  H1521  0 <> 1 0 0 0 0 0 0 <> <> 0 1524 <> 0 0 1 <> <> <> <> <>
  1525 41 39.080729 48.028352 30.908410 123 E A 21 0.06000 0.06000 "GLU " "2HG " "    " 1 0 0 0 FFFFFF  H1522  0 <> 1 0 0 0 0 0 0 <> <> 0 1525 <> 0 0 1 <> <> <> <> <>
  1526 25 40.712270 49.596235 27.207392 124 M A 43 -0.50000 -0.50000 "MET " " N  " "    " 7 0 0 0 5757FF  N1523  0 <> 1 0 0 0 0 0 0 <> <> 0 1526 <> 0 0 1 <> <> <> <> <>
  1527 3 40.119140 50.633681 26.374489 124 M A 2 0.14000 0.14000 "MET " " CA " "    " 6 0 0 0 A0A0A0  C1524  0 <> 1 0 0 0 0 0 0 <> <> 0 1527 <> 0 0 1 <> <> <> <> <>
  1528 2 40.946180 50.729012 25.085354 124 M A 2 0.50000 0.50000 "MET " " C  " "    " 6 0 0 0 A0A0A0  C1525  0 <> 1 0 0 0 0 0 0 <> <> 0 1528 <> 0 0 1 <> <> <> <> <>
  1529 15 42.158691 50.953463 25.101281 124 M A 70 -0.50000 -0.50000 "MET " " O  " "    " 8 0 0 0 FF2F2F  O1526  0 <> 1 0 0 0 0 0 0 <> <> 0 1529 <> 0 0 1 <> <> <> <> <>
  1530 3 40.150520 51.983642 27.123843 124 M A 2 -0.12000 -0.12000 "MET " " CB " "    " 6 0 0 0 A0A0A0  C1527  0 <> 1 0 0 0 0 0 0 <> <> 0 1530 <> 0 0 1 <> <> <> <> <>
  1531 3 39.272174 53.075899 26.487099 124 M A 2 0.04750 0.04750 "MET " " CG " "    " 6 0 0 0 A0A0A0  C1528  0 <> 1 0 0 0 0 0 0 <> <> 0 1531 <> 0 0 1 <> <> <> <> <>
  1532 49 37.489706 52.752214 26.608378 124 M A 13 -0.33500 -0.33500 "MET " " SD " "    " 16 0 0 0 E1E11E  S1529  0 <> 1 0 0 0 0 0 0 <> <> 0 1532 <> 0 0 1 <> <> <> <> <>
  1533 3 36.760070 54.260293 25.921308 124 M A 2 -0.01250 -0.01250 "MET " " CE " "    " 6 0 0 0 A0A0A0  C1530  0 <> 1 0 0 0 0 0 0 <> <> 0 1533 <> 0 0 1 <> <> <> <> <>
  1534 43 41.396514 49.880718 27.900236 124 M A 21 0.30000 0.30000 "MET " " H  " "    " 1 0 0 0 FFFFFF  H1531  0 <> 1 0 0 0 0 0 0 <> <> 0 1534 <> 0 0 1 <> <> <> <> <>
  1535 41 39.084582 50.360951 26.157084 124 M A 21 0.06000 0.06000 "MET " " HA " "    " 1 0 0 0 FFFFFF  H1532  0 <> 1 0 0 0 0 0 0 <> <> 0 1535 <> 0 0 1 <> <> <> <> <>
  1536 41 39.811762 51.828993 28.149681 124 M A 21 0.06000 0.06000 "MET " "1HB " "    " 1 0 0 0 FFFFFF  H1533  0 <> 1 0 0 0 0 0 0 <> <> 0 1536 <> 0 0 1 <> <> <> <> <>
  1537 41 41.177541 52.344577 27.191598 124 M A 21 0.06000 0.06000 "MET " "2HB " "    " 1 0 0 0 FFFFFF  H1534  0 <> 1 0 0 0 0 0 0 <> <> 0 1537 <> 0 0 1 <> <> <> <> <>
  1538 41 39.475674 54.026219 26.981161 124 M A 21 0.06000 0.06000 "MET " "1HG " "    " 1 0 0 0 FFFFFF  H1535  0 <> 1 0 0 0 0 0 0 <> <> 0 1538 <> 0 0 1 <> <> <> <> <>
  1539 41 39.538657 53.205808 25.438777 124 M A 21 0.06000 0.06000 "MET " "2HG " "    " 1 0 0 0 FFFFFF  H1536  0 <> 1 0 0 0 0 0 0 <> <> 0 1539 <> 0 0 1 <> <> <> <> <>
  1540 41 35.684637 54.127049 25.803133 124 M A 21 0.06000 0.06000 "MET " "1HE " "    " 1 0 0 0 FFFFFF  H1537  0 <> 1 0 0 0 0 0 0 <> <> 0 1540 <> 0 0 1 <> <> <> <> <>
  1541 41 36.921429 55.104424 26.589102 124 M A 21 0.06000 0.06000 "MET " "2HE " "    " 1 0 0 0 FFFFFF  H1538  0 <> 1 0 0 0 0 0 0 <> <> 0 1541 <> 0 0 1 <> <> <> <> <>
  1542 41 37.185952 54.492494 24.946449 124 M A 21 0.06000 0.06000 "MET " "3HE " "    " 1 0 0 0 FFFFFF  H1539  0 <> 1 0 0 0 0 0 0 <> <> 0 1542 <> 0 0 1 <> <> <> <> <>
  1543 25 40.264190 50.523900 23.962576 125 K A 43 -0.50000 -0.50000 "LYS " " N  " "    " 7 0 0 0 5757FF  N1540  0 <> 1 0 0 0 0 0 0 <> <> 0 1543 <> 0 0 1 <> <> <> <> <>
  1544 3 40.830663 50.450172 22.624617 125 K A 2 0.14000 0.14000 "LYS " " CA " "    " 6 0 0 0 A0A0A0  C1541  0 <> 1 0 0 0 0 0 0 <> <> 0 1544 <> 0 0 1 <> <> <> <> <>
  1545 2 40.674854 51.815091 21.924078 125 K A 2 0.50000 0.50000 "LYS " " C  " "    " 6 0 0 0 A0A0A0  C1542  0 <> 1 0 0 0 0 0 0 <> <> 0 1545 <> 0 0 1 <> <> <> <> <>
  1546 15 40.064718 52.735910 22.470480 125 K A 70 -0.50000 -0.50000 "LYS " " O  " "    " 8 0 0 0 FF2F2F  O1543  0 <> 1 0 0 0 0 0 0 <> <> 0 1546 <> 0 0 1 <> <> <> <> <>
  1547 3 40.027371 49.376104 21.860613 125 K A 2 -0.12000 -0.12000 "LYS " " CB " "    " 6 0 0 0 A0A0A0  C1544  0 <> 1 0 0 0 0 0 0 <> <> 0 1547 <> 0 0 1 <> <> <> <> <>
  1548 3 39.936754 48.002125 22.568400 125 K A 2 -0.12000 -0.12000 "LYS " " CG " "    " 6 0 0 0 A0A0A0  C1545  0 <> 1 0 0 0 0 0 0 <> <> 0 1548 <> 0 0 1 <> <> <> <> <>
  1549 3 41.260896 47.240263 22.712652 125 K A 2 -0.12000 -0.12000 "LYS " " CD " "    " 6 0 0 0 A0A0A0  C1546  0 <> 1 0 0 0 0 0 0 <> <> 0 1549 <> 0 0 1 <> <> <> <> <>
  1550 3 41.131675 45.826711 23.313734 125 K A 2 0.19000 0.19000 "LYS " " CE " "    " 6 0 0 0 A0A0A0  C1547  0 <> 1 0 0 0 0 0 0 <> <> 0 1550 <> 0 0 1 <> <> <> <> <>
  1551 32 40.170186 44.976204 22.589945 125 K A 43 -0.30000 -0.30000 "LYS " " NZ " "    " 7 1 0 0 5757FF  N1548  0 <> 1 0 0 0 0 0 0 <> <> 0 1551 <> 0 0 1 <> <> <> <> <>
  1552 43 39.265464 50.430510 24.042904 125 K A 21 0.30000 0.30000 "LYS " " H  " "    " 1 0 0 0 FFFFFF  H1549  0 <> 1 0 0 0 0 0 0 <> <> 0 1552 <> 0 0 1 <> <> <> <> <>
  1553 41 41.886293 50.181863 22.666315 125 K A 21 0.06000 0.06000 "LYS " " HA " "    " 1 0 0 0 FFFFFF  H1550  0 <> 1 0 0 0 0 0 0 <> <> 0 1553 <> 0 0 1 <> <> <> <> <>
  1554 41 39.011114 49.737268 21.692058 125 K A 21 0.06000 0.06000 "LYS " "1HB " "    " 1 0 0 0 FFFFFF  H1551  0 <> 1 0 0 0 0 0 0 <> <> 0 1554 <> 0 0 1 <> <> <> <> <>
  1555 41 40.447367 49.244630 20.864156 125 K A 21 0.06000 0.06000 "LYS " "2HB " "    " 1 0 0 0 FFFFFF  H1552  0 <> 1 0 0 0 0 0 0 <> <> 0 1555 <> 0 0 1 <> <> <> <> <>
  1556 41 39.469345 48.097133 23.546445 125 K A 21 0.06000 0.06000 "LYS " "1HG " "    " 1 0 0 0 FFFFFF  H1553  0 <> 1 0 0 0 0 0 0 <> <> 0 1556 <> 0 0 1 <> <> <> <> <>
  1557 41 39.266491 47.391080 21.981052 125 K A 21 0.06000 0.06000 "LYS " "2HG " "    " 1 0 0 0 FFFFFF  H1554  0 <> 1 0 0 0 0 0 0 <> <> 0 1557 <> 0 0 1 <> <> <> <> <>
  1558 41 41.754033 47.178607 21.743683 125 K A 21 0.06000 0.06000 "LYS " "1HD " "    " 1 0 0 0 FFFFFF  H1555  0 <> 1 0 0 0 0 0 0 <> <> 0 1558 <> 0 0 1 <> <> <> <> <>
  1559 41 41.916876 47.812392 23.368549 125 K A 21 0.06000 0.06000 "LYS " "2HD " "    " 1 0 0 0 FFFFFF  H1556  0 <> 1 0 0 0 0 0 0 <> <> 0 1559 <> 0 0 1 <> <> <> <> <>
  1560 41 42.108402 45.340915 23.296718 125 K A 21 0.06000 0.06000 "LYS " "1HE " "    " 1 0 0 0 FFFFFF  H1557  0 <> 1 0 0 0 0 0 0 <> <> 0 1560 <> 0 0 1 <> <> <> <> <>
  1561 41 40.827456 45.889239 24.359755 125 K A 21 0.06000 0.06000 "LYS " "2HE " "    " 1 0 0 0 FFFFFF  H1558  0 <> 1 0 0 0 0 0 0 <> <> 0 1561 <> 0 0 1 <> <> <> <> <>
  1562 44 40.228007 43.991027 22.812165 125 K A 21 0.33000 0.33000 "LYS " "1HZ " "    " 1 0 0 0 FFFFFF  H1559  0 <> 1 0 0 0 0 0 0 <> <> 0 1562 <> 0 0 1 <> <> <> <> <>
  1563 44 39.206775 45.257398 22.747547 125 K A 21 0.33000 0.33000 "LYS " "2HZ " "    " 1 0 0 0 FFFFFF  H1560  0 <> 1 0 0 0 0 0 0 <> <> 0 1563 <> 0 0 1 <> <> <> <> <>
  1564 44 40.310497 44.938249 21.565525 125 K A 21 0.33000 0.33000 "LYS " "3HZ " "    " 1 0 0 0 FFFFFF  H1561  0 <> 1 0 0 0 0 0 0 <> <> 0 1564 <> 0 0 1 <> <> <> <> <>
  1565 25 41.236812 51.960514 20.720652 126 F A 43 -0.50000 -0.50000 "PHE " " N  " "    " 7 0 0 0 5757FF  N1562  2 <> 1 0 0 0 0 0 0 <> <> 0 1565 <> 0 0 1 <> <> <> <> <>
  1566 3 41.162544 53.162594 19.896066 126 F A 2 0.14000 0.14000 "PHE " " CA " "    " 6 0 0 0 A0A0A0  C1563  2 <> 1 0 0 0 0 0 0 <> <> 0 1566 <> 0 0 1 <> <> <> <> <>
  1567 2 41.389973 52.786950 18.429868 126 F A 2 0.50000 0.50000 "PHE " " C  " "    " 6 0 0 0 A0A0A0  C1564  2 <> 1 0 0 0 0 0 0 <> <> 0 1567 <> 0 0 1 <> <> <> <> <>
  1568 15 42.190083 51.893888 18.154540 126 F A 70 -0.50000 -0.50000 "PHE " " O  " "    " 8 0 0 0 FF2F2F  O1565  2 <> 1 0 0 0 0 0 0 <> <> 0 1568 <> 0 0 1 <> <> <> <> <>
  1569 3 42.181547 54.205521 20.408404 126 F A 2 -0.00500 -0.00500 "PHE " " CB " "    " 6 0 0 0 A0A0A0  C1566  2 <> 1 0 0 0 0 0 0 <> <> 0 1569 <> 0 0 1 <> <> <> <> <>
  1570 2 42.054584 55.625200 19.871842 126 F A 2 -0.11500 -0.11500 "PHE " " CG " "    " 6 0 0 0 A0A0A0  C1567  2 <> 1 0 0 0 0 0 0 <> <> 0 1570 <> 0 0 1 <> <> <> <> <>
  1571 2 40.803979 56.283185 19.855370 126 F A 2 -0.11500 -0.11500 "PHE " " CD1" "    " 6 0 0 0 A0A0A0  C1568  2 <> 1 0 0 0 0 0 0 <> <> 0 1571 <> 0 0 1 <> <> <> <> <>
  1572 2 43.206099 56.314608 19.435249 126 F A 2 -0.11500 -0.11500 "PHE " " CD2" "    " 6 0 0 0 A0A0A0  C1569  2 <> 1 0 0 0 0 0 0 <> <> 0 1572 <> 0 0 1 <> <> <> <> <>
  1573 2 40.714554 57.625309 19.442065 126 F A 2 -0.11500 -0.11500 "PHE " " CE1" "    " 6 0 0 0 A0A0A0  C1570  2 <> 1 0 0 0 0 0 0 <> <> 0 1573 <> 0 0 1 <> <> <> <> <>
  1574 2 43.116176 57.659402 19.028073 126 F A 2 -0.11500 -0.11500 "PHE " " CE2" "    " 6 0 0 0 A0A0A0  C1571  2 <> 1 0 0 0 0 0 0 <> <> 0 1574 <> 0 0 1 <> <> <> <> <>
  1575 2 41.872729 58.318846 19.048805 126 F A 2 -0.11500 -0.11500 "PHE " " CZ " "    " 6 0 0 0 A0A0A0  C1572  2 <> 1 0 0 0 0 0 0 <> <> 0 1575 <> 0 0 1 <> <> <> <> <>
  1576 43 41.771815 51.187204 20.325312 126 F A 21 0.30000 0.30000 "PHE " " H  " "    " 1 0 0 0 FFFFFF  H1573  2 <> 1 0 0 0 0 0 0 <> <> 0 1576 <> 0 0 1 <> <> <> <> <>
  1577 41 40.150543 53.553569 19.989297 126 F A 21 0.06000 0.06000 "PHE " " HA " "    " 1 0 0 0 FFFFFF  H1574  2 <> 1 0 0 0 0 0 0 <> <> 0 1577 <> 0 0 1 <> <> <> <> <>
  1578 41 42.125492 54.273957 21.493887 126 F A 21 0.06000 0.06000 "PHE " "1HB " "    " 1 0 0 0 FFFFFF  H1575  2 <> 1 0 0 0 0 0 0 <> <> 0 1578 <> 0 0 1 <> <> <> <> <>
  1579 41 43.187212 53.837327 20.199724 126 F A 21 0.06000 0.06000 "PHE " "2HB " "    " 1 0 0 0 FFFFFF  H1576  2 <> 1 0 0 0 0 0 0 <> <> 0 1579 <> 0 0 1 <> <> <> <> <>
  1580 41 39.906919 55.776492 20.182304 126 F A 21 0.11500 0.11500 "PHE " " HD1" "    " 1 0 0 0 FFFFFF  H1577  2 <> 1 0 0 0 0 0 0 <> <> 0 1580 <> 0 0 1 <> <> <> <> <>
  1581 41 44.165835 55.819561 19.420171 126 F A 21 0.11500 0.11500 "PHE " " HD2" "    " 1 0 0 0 FFFFFF  H1578  2 <> 1 0 0 0 0 0 0 <> <> 0 1581 <> 0 0 1 <> <> <> <> <>
  1582 41 39.758235 58.125095 19.431866 126 F A 21 0.11500 0.11500 "PHE " " HE1" "    " 1 0 0 0 FFFFFF  H1579  2 <> 1 0 0 0 0 0 0 <> <> 0 1582 <> 0 0 1 <> <> <> <> <>
  1583 41 43.999625 58.185777 18.696367 126 F A 21 0.11500 0.11500 "PHE " " HE2" "    " 1 0 0 0 FFFFFF  H1580  2 <> 1 0 0 0 0 0 0 <> <> 0 1583 <> 0 0 1 <> <> <> <> <>
  1584 41 41.803357 59.351215 18.742260 126 F A 21 0.11500 0.11500 "PHE " " HZ " "    " 1 0 0 0 FFFFFF  H1581  2 <> 1 0 0 0 0 0 0 <> <> 0 1584 <> 0 0 1 <> <> <> <> <>
  1585 25 40.744317 53.481738 17.489171 127 I A 43 -0.50000 -0.50000 "ILE " " N  " "    " 7 0 0 0 5757FF  N1582  2 <> 1 0 0 0 0 0 0 <> <> 0 1585 <> 0 0 1 <> <> <> <> <>
  1586 3 40.972172 53.367446 16.050058 127 I A 2 0.14000 0.14000 "ILE " " CA " "    " 6 0 0 0 A0A0A0  C1583  2 <> 1 0 0 0 0 0 0 <> <> 0 1586 <> 0 0 1 <> <> <> <> <>
  1587 2 41.155637 54.785887 15.476076 127 I A 2 0.50000 0.50000 "ILE " " C  " "    " 6 0 0 0 A0A0A0  C1584  2 <> 1 0 0 0 0 0 0 <> <> 0 1587 <> 0 0 1 <> <> <> <> <>
  1588 15 40.489600 55.722191 15.927386 127 I A 70 -0.50000 -0.50000 "ILE " " O  " "    " 8 0 0 0 FF2F2F  O1585  2 <> 1 0 0 0 0 0 0 <> <> 0 1588 <> 0 0 1 <> <> <> <> <>
  1589 3 39.896838 52.464871 15.362669 127 I A 2 -0.06000 -0.06000 "ILE " " CB " "    " 6 0 0 0 A0A0A0  C1586  2 <> 1 0 0 0 0 0 0 <> <> 0 1589 <> 0 0 1 <> <> <> <> <>
  1590 3 39.716075 51.113475 16.091027 127 I A 2 -0.18000 -0.18000 "ILE " " CG2" "    " 6 0 0 0 A0A0A0  C1587  2 <> 1 0 0 0 0 0 0 <> <> 0 1590 <> 0 0 1 <> <> <> <> <>
  1591 3 38.521197 53.138328 15.187514 127 I A 2 -0.12000 -0.12000 "ILE " " CG1" "    " 6 0 0 0 A0A0A0  C1588  2 <> 1 0 0 0 0 0 0 <> <> 0 1591 <> 0 0 1 <> <> <> <> <>
  1592 3 37.561443 52.406884 14.238164 127 I A 2 -0.18000 -0.18000 "ILE " " CD1" "    " 6 0 0 0 A0A0A0  C1589  2 <> 1 0 0 0 0 0 0 <> <> 0 1592 <> 0 0 1 <> <> <> <> <>
  1593 43 40.079647 54.192581 17.770627 127 I A 21 0.30000 0.30000 "ILE " " H  " "    " 1 0 0 0 FFFFFF  H1590  2 <> 1 0 0 0 0 0 0 <> <> 0 1593 <> 0 0 1 <> <> <> <> <>
  1594 41 41.933705 52.873918 15.902464 127 I A 21 0.06000 0.06000 "ILE " " HA " "    " 1 0 0 0 FFFFFF  H1591  2 <> 1 0 0 0 0 0 0 <> <> 0 1594 <> 0 0 1 <> <> <> <> <>
  1595 41 40.276606 52.259426 14.361720 127 I A 21 0.06000 0.06000 "ILE " " HB " "    " 1 0 0 0 FFFFFF  H1592  2 <> 1 0 0 0 0 0 0 <> <> 0 1595 <> 0 0 1 <> <> <> <> <>
  1596 41 39.175230 50.391500 15.483308 127 I A 21 0.06000 0.06000 "ILE " "1HG2" "    " 1 0 0 0 FFFFFF  H1593  2 <> 1 0 0 0 0 0 0 <> <> 0 1596 <> 0 0 1 <> <> <> <> <>
  1597 41 40.663125 50.662104 16.368380 127 I A 21 0.06000 0.06000 "ILE " "2HG2" "    " 1 0 0 0 FFFFFF  H1594  2 <> 1 0 0 0 0 0 0 <> <> 0 1597 <> 0 0 1 <> <> <> <> <>
  1598 41 39.161262 51.245451 17.019817 127 I A 21 0.06000 0.06000 "ILE " "3HG2" "    " 1 0 0 0 FFFFFF  H1595  2 <> 1 0 0 0 0 0 0 <> <> 0 1598 <> 0 0 1 <> <> <> <> <>
  1599 41 38.059775 53.226522 16.169858 127 I A 21 0.06000 0.06000 "ILE " "1HG1" "    " 1 0 0 0 FFFFFF  H1596  2 <> 1 0 0 0 0 0 0 <> <> 0 1599 <> 0 0 1 <> <> <> <> <>
  1600 41 38.631827 54.150477 14.800411 127 I A 21 0.06000 0.06000 "ILE " "2HG1" "    " 1 0 0 0 FFFFFF  H1597  2 <> 1 0 0 0 0 0 0 <> <> 0 1600 <> 0 0 1 <> <> <> <> <>
  1601 41 36.603709 52.925318 14.199071 127 I A 21 0.06000 0.06000 "ILE " "1HD1" "    " 1 0 0 0 FFFFFF  H1598  2 <> 1 0 0 0 0 0 0 <> <> 0 1601 <> 0 0 1 <> <> <> <> <>
  1602 41 37.946927 52.369807 13.221838 127 I A 21 0.06000 0.06000 "ILE " "2HD1" "    " 1 0 0 0 FFFFFF  H1599  2 <> 1 0 0 0 0 0 0 <> <> 0 1602 <> 0 0 1 <> <> <> <> <>
  1603 41 37.360484 51.385199 14.548181 127 I A 21 0.06000 0.06000 "ILE " "3HD1" "    " 1 0 0 0 FFFFFF  H1600  2 <> 1 0 0 0 0 0 0 <> <> 0 1603 <> 0 0 1 <> <> <> <> <>
  1604 25 42.074370 54.942133 14.515703 128 W A 43 -0.50000 -0.50000 "TRP " " N  " "    " 7 0 0 0 5757FF  N1601  2 <> 1 0 0 0 0 0 0 <> <> 0 1604 <> 0 0 1 <> <> <> <> <>
  1605 3 42.468640 56.204073 13.889303 128 W A 2 0.14000 0.14000 "TRP " " CA " "    " 6 0 0 0 A0A0A0  C1602  2 <> 1 0 0 0 0 0 0 <> <> 0 1605 <> 0 0 1 <> <> <> <> <>
  1606 2 42.631420 55.993811 12.378293 128 W A 2 0.50000 0.50000 "TRP " " C  " "    " 6 0 0 0 A0A0A0  C1603  2 <> 1 0 0 0 0 0 0 <> <> 0 1606 <> 0 0 1 <> <> <> <> <>
  1607 15 43.051070 54.902507 11.979295 128 W A 70 -0.50000 -0.50000 "TRP " " O  " "    " 8 0 0 0 FF2F2F  O1604  2 <> 1 0 0 0 0 0 0 <> <> 0 1607 <> 0 0 1 <> <> <> <> <>
  1608 3 43.779827 56.685742 14.539483 128 W A 2 -0.12000 -0.12000 "TRP " " CB " "    " 6 0 0 0 A0A0A0  C1605  2 <> 1 0 0 0 0 0 0 <> <> 0 1608 <> 0 0 1 <> <> <> <> <>
  1609 2 44.153592 58.093193 14.205634 128 W A 2 0.07500 0.07500 "TRP " " CG " "    " 6 0 0 0 A0A0A0  C1606  2 <> 1 0 0 0 0 0 0 <> <> 0 1609 <> 0 0 1 <> <> <> <> <>
  1610 2 43.697467 59.308598 14.859985 128 W A 2 -0.05500 -0.05500 "TRP " " CD2" "    " 6 0 0 0 A0A0A0  C1607  2 <> 1 0 0 0 0 0 0 <> <> 0 1610 <> 0 0 1 <> <> <> <> <>
  1611 2 44.256171 60.428599 14.178276 128 W A 2 0.13000 0.13000 "TRP " " CE2" "    " 6 0 0 0 A0A0A0  C1608  2 <> 1 0 0 0 0 0 0 <> <> 0 1611 <> 0 0 1 <> <> <> <> <>
  1612 2 42.833121 59.576342 15.943356 128 W A 2 -0.11500 -0.11500 "TRP " " CE3" "    " 6 0 0 0 A0A0A0  C1609  2 <> 1 0 0 0 0 0 0 <> <> 0 1612 <> 0 0 1 <> <> <> <> <>
  1613 2 44.957163 58.491085 13.194228 128 W A 2 -0.11500 -0.11500 "TRP " " CD1" "    " 6 0 0 0 A0A0A0  C1610  2 <> 1 0 0 0 0 0 0 <> <> 0 1613 <> 0 0 1 <> <> <> <> <>
  1614 25 44.997325 59.870188 13.162519 128 W A 43 -0.57000 -0.57000 "TRP " " NE1" "    " 7 0 0 0 5757FF  N1611  2 <> 1 0 0 0 0 0 0 <> <> 0 1614 <> 0 0 1 <> <> <> <> <>
  1615 2 43.991160 61.749999 14.568986 128 W A 2 -0.11500 -0.11500 "TRP " " CZ2" "    " 6 0 0 0 A0A0A0  C1612  2 <> 1 0 0 0 0 0 0 <> <> 0 1615 <> 0 0 1 <> <> <> <> <>
  1616 2 42.573181 60.896080 16.358069 128 W A 2 -0.11500 -0.11500 "TRP " " CZ3" "    " 6 0 0 0 A0A0A0  C1613  2 <> 1 0 0 0 0 0 0 <> <> 0 1616 <> 0 0 1 <> <> <> <> <>
  1617 2 43.160480 61.977350 15.678385 128 W A 2 -0.11500 -0.11500 "TRP " " CH2" "    " 6 0 0 0 A0A0A0  C1614  2 <> 1 0 0 0 0 0 0 <> <> 0 1617 <> 0 0 1 <> <> <> <> <>
  1618 43 42.592732 54.131206 14.196575 128 W A 21 0.30000 0.30000 "TRP " " H  " "    " 1 0 0 0 FFFFFF  H1615  2 <> 1 0 0 0 0 0 0 <> <> 0 1618 <> 0 0 1 <> <> <> <> <>
  1619 41 41.687994 56.952381 14.046874 128 W A 21 0.06000 0.06000 "TRP " " HA " "    " 1 0 0 0 FFFFFF  H1616  2 <> 1 0 0 0 0 0 0 <> <> 0 1619 <> 0 0 1 <> <> <> <> <>
  1620 41 43.706102 56.620467 15.625381 128 W A 21 0.06000 0.06000 "TRP " "1HB " "    " 1 0 0 0 FFFFFF  H1617  2 <> 1 0 0 0 0 0 0 <> <> 0 1620 <> 0 0 1 <> <> <> <> <>
  1621 41 44.600557 56.025943 14.252516 128 W A 21 0.06000 0.06000 "TRP " "2HB " "    " 1 0 0 0 FFFFFF  H1618  2 <> 1 0 0 0 0 0 0 <> <> 0 1621 <> 0 0 1 <> <> <> <> <>
  1622 41 42.349622 58.746401 16.434639 128 W A 21 0.11500 0.11500 "TRP " " HE3" "    " 1 0 0 0 FFFFFF  H1619  2 <> 1 0 0 0 0 0 0 <> <> 0 1622 <> 0 0 1 <> <> <> <> <>
  1623 41 45.420845 57.820892 12.484790 128 W A 21 0.11500 0.11500 "TRP " " HD1" "    " 1 0 0 0 FFFFFF  H1620  2 <> 1 0 0 0 0 0 0 <> <> 0 1623 <> 0 0 1 <> <> <> <> <>
  1624 43 45.346328 60.392312 12.351548 128 W A 21 0.42000 0.42000 "TRP " " HE1" "    " 1 0 0 0 FFFFFF  H1621  2 <> 1 0 0 0 0 0 0 <> <> 0 1624 <> 0 0 1 <> <> <> <> <>
  1625 41 44.407657 62.579159 14.023451 128 W A 21 0.11500 0.11500 "TRP " " HZ2" "    " 1 0 0 0 FFFFFF  H1622  2 <> 1 0 0 0 0 0 0 <> <> 0 1625 <> 0 0 1 <> <> <> <> <>
  1626 41 41.895817 61.086434 17.174967 128 W A 21 0.11500 0.11500 "TRP " " HZ3" "    " 1 0 0 0 FFFFFF  H1623  2 <> 1 0 0 0 0 0 0 <> <> 0 1626 <> 0 0 1 <> <> <> <> <>
  1627 41 42.934572 62.981055 15.988660 128 W A 21 0.11500 0.11500 "TRP " " HH2" "    " 1 0 0 0 FFFFFF  H1624  2 <> 1 0 0 0 0 0 0 <> <> 0 1627 <> 0 0 1 <> <> <> <> <>
  1628 25 42.364817 57.018075 11.552694 129 A A 43 -0.50000 -0.50000 "ALA " " N  " "    " 7 0 0 0 5757FF  N1625  0 <> 1 0 0 0 0 0 0 <> <> 0 1628 <> 0 0 1 <> <> <> <> <>
  1629 3 42.511140 56.950820 10.098958 129 A A 2 0.14000 0.14000 "ALA " " CA " "    " 6 0 0 0 A0A0A0  C1626  0 <> 1 0 0 0 0 0 0 <> <> 0 1629 <> 0 0 1 <> <> <> <> <>
  1630 2 43.465085 58.008250 9.542752 129 A A 2 0.50000 0.50000 "ALA " " C  " "    " 6 0 0 0 A0A0A0  C1627  0 <> 1 0 0 0 0 0 0 <> <> 0 1630 <> 0 0 1 <> <> <> <> <>
  1631 15 44.308311 57.682839 8.708515 129 A A 70 -0.50000 -0.50000 "ALA " " O  " "    " 8 0 0 0 FF2F2F  O1628  0 <> 1 0 0 0 0 0 0 <> <> 0 1631 <> 0 0 1 <> <> <> <> <>
  1632 3 41.130136 57.043241 9.429132 129 A A 2 -0.18000 -0.18000 "ALA " " CB " "    " 6 0 0 0 A0A0A0  C1629  0 <> 1 0 0 0 0 0 0 <> <> 0 1632 <> 0 0 1 <> <> <> <> <>
  1633 43 42.028258 57.906677 11.922573 129 A A 21 0.30000 0.30000 "ALA " " H  " "    " 1 0 0 0 FFFFFF  H1630  0 <> 1 0 0 0 0 0 0 <> <> 0 1633 <> 0 0 1 <> <> <> <> <>
  1634 41 42.970455 56.007618 9.819279 129 A A 21 0.06000 0.06000 "ALA " " HA " "    " 1 0 0 0 FFFFFF  H1631  0 <> 1 0 0 0 0 0 0 <> <> 0 1634 <> 0 0 1 <> <> <> <> <>
  1635 41 41.215056 56.976824 8.344083 129 A A 21 0.06000 0.06000 "ALA " "1HB " "    " 1 0 0 0 FFFFFF  H1632  0 <> 1 0 0 0 0 0 0 <> <> 0 1635 <> 0 0 1 <> <> <> <> <>
  1636 41 40.482930 56.231951 9.756042 129 A A 21 0.06000 0.06000 "ALA " "2HB " "    " 1 0 0 0 FFFFFF  H1633  0 <> 1 0 0 0 0 0 0 <> <> 0 1636 <> 0 0 1 <> <> <> <> <>
  1637 41 40.628763 57.982602 9.665425 129 A A 21 0.06000 0.06000 "ALA " "3HB " "    " 1 0 0 0 FFFFFF  H1634  0 <> 1 0 0 0 0 0 0 <> <> 0 1637 <> 0 0 1 <> <> <> <> <>
  1638 25 43.321058 59.257056 9.988628 130 E A 43 -0.50000 -0.50000 "GLU " " N  " "    " 7 0 0 1 5757FF  N1635  0 <> 1 0 0 0 0 0 0 <> <> 0 1638 <> 0 0 1 <> <> <> <> <>
  1639 3 43.915450 60.466254 9.442777 130 E A 2 0.14000 0.14000 "GLU " " CA " "    " 6 0 0 1 A0A0A0  C1636  0 <> 1 0 0 0 0 0 0 <> <> 0 1639 <> 0 0 1 <> <> <> <> <>
  1640 2 45.394863 60.589717 9.865592 130 E A 2 0.50000 0.50000 "GLU " " C  " "    " 6 0 0 1 A0A0A0  C1637  0 <> 1 0 0 0 0 0 0 <> <> 0 1640 <> 0 0 1 <> <> <> <> <>
  1641 15 45.730220 61.211895 10.883213 130 E A 70 -0.50000 -0.50000 "GLU " " O  " "    " 8 0 0 1 FF2F2F  O1638  0 <> 1 0 0 0 0 0 0 <> <> 0 1641 <> 0 0 1 <> <> <> <> <>
  1642 3 43.092687 61.669150 9.980972 130 E A 2 -0.12000 -0.12000 "GLU " " CB " "    " 6 0 0 1 A0A0A0  C1639  0 <> 1 0 0 0 0 0 0 <> <> 0 1642 <> 0 0 1 <> <> <> <> <>
  1643 3 41.564641 61.600567 9.713703 130 E A 2 -0.22000 -0.22000 "GLU " " CG " "    " 6 0 0 1 A0A0A0  C1640  0 <> 1 0 0 0 0 0 0 <> <> 0 1643 <> 0 0 1 <> <> <> <> <>
  1644 2 40.729870 60.939757 10.815471 130 E A 2 0.70000 0.70000 "GLU " " CD " "    " 6 0 0 1 A0A0A0  C1641  0 <> 1 0 0 0 0 0 0 <> <> 0 1644 <> 0 0 1 <> <> <> <> <>
  1645 18 41.205770 59.940811 11.401503 130 E A 70 -0.80000 -0.80000 "GLU " " OE1" "    " 8 -1 0 1 FF2F2F  O1642  0 <> 1 0 0 0 0 0 0 <> <> 0 1645 <> 0 0 1 <> <> <> <> <>
  1646 15 39.598265 61.426971 11.039540 130 E A 70 -0.80000 -0.80000 "GLU " " OE2" "    " 8 0 0 1 FF2F2F  O1643  0 <> 1 0 0 0 0 0 0 <> <> 0 1646 <> 0 0 1 <> <> <> <> <>
  1647 43 42.540116 59.430936 10.643484 130 E A 21 0.30000 0.30000 "GLU " " H  " "    " 1 0 0 1 FFFFFF  H1644  0 <> 1 0 0 0 0 0 0 <> <> 0 1647 <> 0 0 1 <> <> <> <> <>
  1648 41 43.852321 60.439912 8.352600 130 E A 21 0.06000 0.06000 "GLU " " HA " "    " 1 0 0 0 FFFFFF  H1645  0 <> 1 0 0 0 0 0 0 <> <> 0 1648 <> 0 0 1 <> <> <> <> <>
  1649 41 43.244204 61.787439 11.056101 130 E A 21 0.06000 0.06000 "GLU " "1HB " "    " 1 0 0 0 FFFFFF  H1646  0 <> 1 0 0 0 0 0 0 <> <> 0 1649 <> 0 0 1 <> <> <> <> <>
  1650 41 43.479186 62.585429 9.532517 130 E A 21 0.06000 0.06000 "GLU " "2HB " "    " 1 0 0 0 FFFFFF  H1647  0 <> 1 0 0 0 0 0 0 <> <> 0 1650 <> 0 0 1 <> <> <> <> <>
  1651 41 41.188700 62.616613 9.607445 130 E A 21 0.06000 0.06000 "GLU " "1HG " "    " 1 0 0 0 FFFFFF  H1648  0 <> 1 0 0 0 0 0 0 <> <> 0 1651 <> 0 0 1 <> <> <> <> <>
  1652 41 41.357186 61.103028 8.766791 130 E A 21 0.06000 0.06000 "GLU " "2HG " "    " 1 0 0 0 FFFFFF  H1649  0 <> 1 0 0 0 0 0 0 <> <> 0 1652 <> 0 0 1 <> <> <> <> <>
  1653 25 46.308747 59.975290 9.101698 131 I A 43 -0.50000 -0.50000 "ILE " " N  " "    " 7 0 0 0 5757FF  N1650  1 <> 1 0 0 0 0 0 0 <> <> 0 1653 <> 0 0 1 <> <> <> <> <>
  1654 3 47.743738 59.946783 9.397543 131 I A 2 0.14000 0.14000 "ILE " " CA " "    " 6 0 0 0 A0A0A0  C1651  1 <> 1 0 0 0 0 0 0 <> <> 0 1654 <> 0 0 1 <> <> <> <> <>
  1655 2 48.403128 61.332841 9.269948 131 I A 2 0.50000 0.50000 "ILE " " C  " "    " 6 0 0 0 A0A0A0  C1652  1 <> 1 0 0 0 0 0 0 <> <> 0 1655 <> 0 0 1 <> <> <> <> <>
  1656 15 49.430889 61.543389 9.910053 131 I A 70 -0.50000 -0.50000 "ILE " " O  " "    " 8 0 0 0 FF2F2F  O1653  1 <> 1 0 0 0 0 0 0 <> <> 0 1656 <> 0 0 1 <> <> <> <> <>
  1657 3 48.472106 58.843788 8.569858 131 I A 2 -0.06000 -0.06000 "ILE " " CB " "    " 6 0 0 0 A0A0A0  C1654  1 <> 1 0 0 0 0 0 0 <> <> 0 1657 <> 0 0 1 <> <> <> <> <>
  1658 3 50.002694 58.787039 8.769572 131 I A 2 -0.18000 -0.18000 "ILE " " CG2" "    " 6 0 0 0 A0A0A0  C1655  1 <> 1 0 0 0 0 0 0 <> <> 0 1658 <> 0 0 1 <> <> <> <> <>
  1659 3 47.876335 57.440955 8.829323 131 I A 2 -0.12000 -0.12000 "ILE " " CG1" "    " 6 0 0 0 A0A0A0  C1656  1 <> 1 0 0 0 0 0 0 <> <> 0 1659 <> 0 0 1 <> <> <> <> <>
  1660 3 47.845488 57.002741 10.301993 131 I A 2 -0.18000 -0.18000 "ILE " " CD1" "    " 6 0 0 0 A0A0A0  C1657  1 <> 1 0 0 0 0 0 0 <> <> 0 1660 <> 0 0 1 <> <> <> <> <>
  1661 43 45.974507 59.431068 8.303933 131 I A 21 0.30000 0.30000 "ILE " " H  " "    " 1 0 0 0 FFFFFF  H1658  1 <> 1 0 0 0 0 0 0 <> <> 0 1661 <> 0 0 1 <> <> <> <> <>
  1662 41 47.840871 59.689795 10.449282 131 I A 21 0.06000 0.06000 "ILE " " HA " "    " 1 0 0 0 FFFFFF  H1659  1 <> 1 0 0 0 0 0 0 <> <> 0 1662 <> 0 0 1 <> <> <> <> <>
  1663 41 48.321613 59.069147 7.514104 131 I A 21 0.06000 0.06000 "ILE " " HB " "    " 1 0 0 0 FFFFFF  H1660  1 <> 1 0 0 0 0 0 0 <> <> 0 1663 <> 0 0 1 <> <> <> <> <>
  1664 41 50.439102 57.928634 8.258949 131 I A 21 0.06000 0.06000 "ILE " "1HG2" "    " 1 0 0 0 FFFFFF  H1661  1 <> 1 0 0 0 0 0 0 <> <> 0 1664 <> 0 0 1 <> <> <> <> <>
  1665 41 50.499268 59.670914 8.368817 131 I A 21 0.06000 0.06000 "ILE " "2HG2" "    " 1 0 0 0 FFFFFF  H1662  1 <> 1 0 0 0 0 0 0 <> <> 0 1665 <> 0 0 1 <> <> <> <> <>
  1666 41 50.264181 58.714195 9.825021 131 I A 21 0.06000 0.06000 "ILE " "3HG2" "    " 1 0 0 0 FFFFFF  H1663  1 <> 1 0 0 0 0 0 0 <> <> 0 1666 <> 0 0 1 <> <> <> <> <>
  1667 41 46.857328 57.407603 8.454431 131 I A 21 0.06000 0.06000 "ILE " "1HG1" "    " 1 0 0 0 FFFFFF  H1664  1 <> 1 0 0 0 0 0 0 <> <> 0 1667 <> 0 0 1 <> <> <> <> <>
  1668 41 48.422839 56.702480 8.241443 131 I A 21 0.06000 0.06000 "ILE " "2HG1" "    " 1 0 0 0 FFFFFF  H1665  1 <> 1 0 0 0 0 0 0 <> <> 0 1668 <> 0 0 1 <> <> <> <> <>
  1669 41 47.476563 55.982917 10.383927 131 I A 21 0.06000 0.06000 "ILE " "1HD1" "    " 1 0 0 0 FFFFFF  H1666  1 <> 1 0 0 0 0 0 0 <> <> 0 1669 <> 0 0 1 <> <> <> <> <>
  1670 41 48.831420 57.044866 10.762045 131 I A 21 0.06000 0.06000 "ILE " "2HD1" "    " 1 0 0 0 FFFFFF  H1667  1 <> 1 0 0 0 0 0 0 <> <> 0 1670 <> 0 0 1 <> <> <> <> <>
  1671 41 47.168645 57.618968 10.892378 131 I A 21 0.06000 0.06000 "ILE " "3HD1" "    " 1 0 0 0 FFFFFF  H1668  1 <> 1 0 0 0 0 0 0 <> <> 0 1671 <> 0 0 1 <> <> <> <> <>
  1672 25 47.790528 62.298035 8.566534 132 S A 43 -0.50000 -0.50000 "SER " " N  " "    " 7 0 0 0 5757FF  N1669  1 <> 1 0 0 0 0 0 0 <> <> 0 1672 <> 0 0 1 <> <> <> <> <>
  1673 3 48.183012 63.711467 8.550004 132 S A 2 0.14000 0.14000 "SER " " CA " "    " 6 0 0 0 A0A0A0  C1670  1 <> 1 0 0 0 0 0 0 <> <> 0 1673 <> 0 0 1 <> <> <> <> <>
  1674 2 48.352753 64.295602 9.962584 132 S A 2 0.50000 0.50000 "SER " " C  " "    " 6 0 0 0 A0A0A0  C1671  1 <> 1 0 0 0 0 0 0 <> <> 0 1674 <> 0 0 1 <> <> <> <> <>
  1675 15 49.439555 64.745593 10.324929 132 S A 70 -0.50000 -0.50000 "SER " " O  " "    " 8 0 0 0 FF2F2F  O1672  1 <> 1 0 0 0 0 0 0 <> <> 0 1675 <> 0 0 1 <> <> <> <> <>
  1676 3 47.185435 64.524250 7.704826 132 S A 2 0.14500 0.14500 "SER " " CB " "    " 6 0 0 0 A0A0A0  C1673  1 <> 1 0 0 0 0 0 0 <> <> 0 1676 <> 0 0 1 <> <> <> <> <>
  1677 16 45.850986 64.329551 8.148506 132 S A 70 -0.68300 -0.68300 "SER " " OG " "    " 8 0 0 0 FF2F2F  O1674  1 <> 1 0 0 0 0 0 0 <> <> 0 1677 <> 0 0 1 <> <> <> <> <>
  1678 43 46.922059 62.071184 8.098512 132 S A 21 0.30000 0.30000 "SER " " H  " "    " 1 0 0 0 FFFFFF  H1675  1 <> 1 0 0 0 0 0 0 <> <> 0 1678 <> 0 0 1 <> <> <> <> <>
  1679 41 49.159417 63.770098 8.069767 132 S A 21 0.06000 0.06000 "SER " " HA " "    " 1 0 0 0 FFFFFF  H1676  1 <> 1 0 0 0 0 0 0 <> <> 0 1679 <> 0 0 1 <> <> <> <> <>
  1680 41 47.432072 65.584874 7.751230 132 S A 21 0.06000 0.06000 "SER " "1HB " "    " 1 0 0 0 FFFFFF  H1677  1 <> 1 0 0 0 0 0 0 <> <> 0 1680 <> 0 0 1 <> <> <> <> <>
  1681 41 47.253401 64.246590 6.655478 132 S A 21 0.06000 0.06000 "SER " "2HB " "    " 1 0 0 0 FFFFFF  H1678  1 <> 1 0 0 0 0 0 0 <> <> 0 1681 <> 0 0 1 <> <> <> <> <>
  1682 42 45.472969 63.660780 7.575183 132 S A 21 0.41800 0.41800 "SER " " HG " "    " 1 0 0 0 FFFFFF  H1679  1 <> 1 0 0 0 0 0 0 <> <> 0 1682 <> 0 0 1 <> <> <> <> <>
  1683 25 47.307443 64.201124 10.792571 133 Y A 43 -0.50000 -0.50000 "TYR " " N  " "    " 7 0 0 0 5757FF  N1680  1 <> 1 0 0 0 0 0 0 <> <> 0 1683 <> 0 0 1 <> <> <> <> <>
  1684 3 47.319531 64.669767 12.174199 133 Y A 2 0.14000 0.14000 "TYR " " CA " "    " 6 0 0 0 A0A0A0  C1681  1 <> 1 0 0 0 0 0 0 <> <> 0 1684 <> 0 0 1 <> <> <> <> <>
  1685 2 48.162240 63.787476 13.098277 133 Y A 2 0.50000 0.50000 "TYR " " C  " "    " 6 0 0 0 A0A0A0  C1682  1 <> 1 0 0 0 0 0 0 <> <> 0 1685 <> 0 0 1 <> <> <> <> <>
  1686 15 48.784783 64.307813 14.025802 133 Y A 70 -0.50000 -0.50000 "TYR " " O  " "    " 8 0 0 0 FF2F2F  O1683  1 <> 1 0 0 0 0 0 0 <> <> 0 1686 <> 0 0 1 <> <> <> <> <>
  1687 3 45.886682 64.750233 12.724502 133 Y A 2 -0.00500 -0.00500 "TYR " " CB " "    " 6 0 0 0 A0A0A0  C1684  1 <> 1 0 0 0 0 0 0 <> <> 0 1687 <> 0 0 1 <> <> <> <> <>
  1688 2 45.130424 65.969401 12.240683 133 Y A 2 -0.11500 -0.11500 "TYR " " CG " "    " 6 0 0 0 A0A0A0  C1685  1 <> 1 0 0 0 0 0 0 <> <> 0 1688 <> 0 0 1 <> <> <> <> <>
  1689 2 43.872050 65.826396 11.622031 133 Y A 2 -0.11500 -0.11500 "TYR " " CD2" "    " 6 0 0 0 A0A0A0  C1686  1 <> 1 0 0 0 0 0 0 <> <> 0 1689 <> 0 0 1 <> <> <> <> <>
  1690 2 43.214848 66.956431 11.103102 133 Y A 2 -0.11500 -0.11500 "TYR " " CE2" "    " 6 0 0 0 A0A0A0  C1687  1 <> 1 0 0 0 0 0 0 <> <> 0 1690 <> 0 0 1 <> <> <> <> <>
  1691 2 45.699158 67.254516 12.376586 133 Y A 2 -0.11500 -0.11500 "TYR " " CD1" "    " 6 0 0 0 A0A0A0  C1688  1 <> 1 0 0 0 0 0 0 <> <> 0 1691 <> 0 0 1 <> <> <> <> <>
  1692 2 45.055301 68.368490 11.817179 133 Y A 2 -0.11500 -0.11500 "TYR " " CE1" "    " 6 0 0 0 A0A0A0  C1689  1 <> 1 0 0 0 0 0 0 <> <> 0 1692 <> 0 0 1 <> <> <> <> <>
  1693 2 43.822212 68.220116 11.169752 133 Y A 2 0.15000 0.15000 "TYR " " CZ " "    " 6 0 0 0 A0A0A0  C1690  1 <> 1 0 0 0 0 0 0 <> <> 0 1693 <> 0 0 1 <> <> <> <> <>
  1694 16 43.250823 69.302452 10.580563 133 Y A 70 -0.58500 -0.58500 "TYR " " OH " "    " 8 0 0 0 FF2F2F  O1691  1 <> 1 0 0 0 0 0 0 <> <> 0 1694 <> 0 0 1 <> <> <> <> <>
  1695 43 46.431172 63.897247 10.380558 133 Y A 21 0.30000 0.30000 "TYR " " H  " "    " 1 0 0 0 FFFFFF  H1692  1 <> 1 0 0 0 0 0 0 <> <> 0 1695 <> 0 0 1 <> <> <> <> <>
  1696 41 47.771917 65.655400 12.190537 133 Y A 21 0.06000 0.06000 "TYR " " HA " "    " 1 0 0 0 FFFFFF  H1693  1 <> 1 0 0 0 0 0 0 <> <> 0 1696 <> 0 0 1 <> <> <> <> <>
  1697 41 45.336179 63.845729 12.462962 133 Y A 21 0.06000 0.06000 "TYR " "1HB " "    " 1 0 0 0 FFFFFF  H1694  1 <> 1 0 0 0 0 0 0 <> <> 0 1697 <> 0 0 1 <> <> <> <> <>
  1698 41 45.906375 64.796589 13.813266 133 Y A 21 0.06000 0.06000 "TYR " "2HB " "    " 1 0 0 0 FFFFFF  H1695  1 <> 1 0 0 0 0 0 0 <> <> 0 1698 <> 0 0 1 <> <> <> <> <>
  1699 41 43.403683 64.857342 11.516435 133 Y A 21 0.11500 0.11500 "TYR " " HD2" "    " 1 0 0 0 FFFFFF  H1696  1 <> 1 0 0 0 0 0 0 <> <> 0 1699 <> 0 0 1 <> <> <> <> <>
  1700 41 42.258302 66.844007 10.622264 133 Y A 21 0.11500 0.11500 "TYR " " HE2" "    " 1 0 0 0 FFFFFF  H1697  1 <> 1 0 0 0 0 0 0 <> <> 0 1700 <> 0 0 1 <> <> <> <> <>
  1701 41 46.653369 67.397256 12.858951 133 Y A 21 0.11500 0.11500 "TYR " " HD1" "    " 1 0 0 0 FFFFFF  H1698  1 <> 1 0 0 0 0 0 0 <> <> 0 1701 <> 0 0 1 <> <> <> <> <>
  1702 41 45.525140 69.335039 11.837225 133 Y A 21 0.11500 0.11500 "TYR " " HE1" "    " 1 0 0 0 FFFFFF  H1699  1 <> 1 0 0 0 0 0 0 <> <> 0 1702 <> 0 0 1 <> <> <> <> <>
  1703 42 43.801870 70.074019 10.659878 133 Y A 21 0.43500 0.43500 "TYR " " HH " "    " 1 0 0 0 FFFFFF  H1700  1 <> 1 0 0 0 0 0 0 <> <> 0 1703 <> 0 0 1 <> <> <> <> <>
  1704 25 48.228221 62.476801 12.830520 134 F A 43 -0.50000 -0.50000 "PHE " " N  " "    " 7 0 0 0 5757FF  N1701  1 <> 1 0 0 0 0 0 0 <> <> 0 1704 <> 0 0 1 <> <> <> <> <>
  1705 3 49.055682 61.530088 13.581207 134 F A 2 0.14000 0.14000 "PHE " " CA " "    " 6 0 0 0 A0A0A0  C1702  1 <> 1 0 0 0 0 0 0 <> <> 0 1705 <> 0 0 1 <> <> <> <> <>
  1706 2 50.550994 61.859173 13.390638 134 F A 2 0.50000 0.50000 "PHE " " C  " "    " 6 0 0 0 A0A0A0  C1703  1 <> 1 0 0 0 0 0 0 <> <> 0 1706 <> 0 0 1 <> <> <> <> <>
  1707 15 51.309170 61.924995 14.361514 134 F A 70 -0.50000 -0.50000 "PHE " " O  " "    " 8 0 0 0 FF2F2F  O1704  1 <> 1 0 0 0 0 0 0 <> <> 0 1707 <> 0 0 1 <> <> <> <> <>
  1708 3 48.732731 60.090882 13.124950 134 F A 2 -0.00500 -0.00500 "PHE " " CB " "    " 6 0 0 0 A0A0A0  C1705  1 <> 1 0 0 0 0 0 0 <> <> 0 1708 <> 0 0 1 <> <> <> <> <>
  1709 2 49.022026 59.021508 14.161857 134 F A 2 -0.11500 -0.11500 "PHE " " CG " "    " 6 0 0 0 A0A0A0  C1706  1 <> 1 0 0 0 0 0 0 <> <> 0 1709 <> 0 0 1 <> <> <> <> <>
  1710 2 48.074703 58.746266 15.170176 134 F A 2 -0.11500 -0.11500 "PHE " " CD1" "    " 6 0 0 0 A0A0A0  C1707  1 <> 1 0 0 0 0 0 0 <> <> 0 1710 <> 0 0 1 <> <> <> <> <>
  1711 2 50.231220 58.299691 14.123567 134 F A 2 -0.11500 -0.11500 "PHE " " CD2" "    " 6 0 0 0 A0A0A0  C1708  1 <> 1 0 0 0 0 0 0 <> <> 0 1711 <> 0 0 1 <> <> <> <> <>
  1712 2 48.345181 57.768630 16.146922 134 F A 2 -0.11500 -0.11500 "PHE " " CE1" "    " 6 0 0 0 A0A0A0  C1709  1 <> 1 0 0 0 0 0 0 <> <> 0 1712 <> 0 0 1 <> <> <> <> <>
  1713 2 50.500311 57.317479 15.096926 134 F A 2 -0.11500 -0.11500 "PHE " " CE2" "    " 6 0 0 0 A0A0A0  C1710  1 <> 1 0 0 0 0 0 0 <> <> 0 1713 <> 0 0 1 <> <> <> <> <>
  1714 2 49.560761 57.057984 16.114439 134 F A 2 -0.11500 -0.11500 "PHE " " CZ " "    " 6 0 0 0 A0A0A0  C1711  1 <> 1 0 0 0 0 0 0 <> <> 0 1714 <> 0 0 1 <> <> <> <> <>
  1715 43 47.707256 62.141906 12.029416 134 F A 21 0.30000 0.30000 "PHE " " H  " "    " 1 0 0 0 FFFFFF  H1712  1 <> 1 0 0 0 0 0 0 <> <> 0 1715 <> 0 0 1 <> <> <> <> <>
  1716 41 48.804018 61.632506 14.637879 134 F A 21 0.06000 0.06000 "PHE " " HA " "    " 1 0 0 0 FFFFFF  H1713  1 <> 1 0 0 0 0 0 0 <> <> 0 1716 <> 0 0 1 <> <> <> <> <>
  1717 41 47.675668 60.009159 12.874108 134 F A 21 0.06000 0.06000 "PHE " "1HB " "    " 1 0 0 0 FFFFFF  H1714  1 <> 1 0 0 0 0 0 0 <> <> 0 1717 <> 0 0 1 <> <> <> <> <>
  1718 41 49.270400 59.848801 12.207157 134 F A 21 0.06000 0.06000 "PHE " "2HB " "    " 1 0 0 0 FFFFFF  H1715  1 <> 1 0 0 0 0 0 0 <> <> 0 1718 <> 0 0 1 <> <> <> <> <>
  1719 41 47.134003 59.280830 15.193855 134 F A 21 0.11500 0.11500 "PHE " " HD1" "    " 1 0 0 0 FFFFFF  H1716  1 <> 1 0 0 0 0 0 0 <> <> 0 1719 <> 0 0 1 <> <> <> <> <>
  1720 41 50.955111 58.513600 13.353822 134 F A 21 0.11500 0.11500 "PHE " " HD2" "    " 1 0 0 0 FFFFFF  H1717  1 <> 1 0 0 0 0 0 0 <> <> 0 1720 <> 0 0 1 <> <> <> <> <>
  1721 41 47.615916 57.561090 16.916673 134 F A 21 0.11500 0.11500 "PHE " " HE1" "    " 1 0 0 0 FFFFFF  H1718  1 <> 1 0 0 0 0 0 0 <> <> 0 1721 <> 0 0 1 <> <> <> <> <>
  1722 41 51.428648 56.767699 15.070258 134 F A 21 0.11500 0.11500 "PHE " " HE2" "    " 1 0 0 0 FFFFFF  H1719  1 <> 1 0 0 0 0 0 0 <> <> 0 1722 <> 0 0 1 <> <> <> <> <>
  1723 41 49.767622 56.309120 16.865524 134 F A 21 0.11500 0.11500 "PHE " " HZ " "    " 1 0 0 0 FFFFFF  H1720  1 <> 1 0 0 0 0 0 0 <> <> 0 1723 <> 0 0 1 <> <> <> <> <>
  1724 25 50.943050 62.163023 12.144859 135 A A 43 -0.50000 -0.50000 "ALA " " N  " "    " 7 0 0 0 5757FF  N1721  1 <> 1 0 0 0 0 0 0 <> <> 0 1724 <> 0 0 1 <> <> <> <> <>
  1725 3 52.266013 62.617540 11.747272 135 A A 2 0.14000 0.14000 "ALA " " CA " "    " 6 0 0 0 A0A0A0  C1722  1 <> 1 0 0 0 0 0 0 <> <> 0 1725 <> 0 0 1 <> <> <> <> <>
  1726 2 52.552281 64.022820 12.274503 135 A A 2 0.50000 0.50000 "ALA " " C  " "    " 6 0 0 0 A0A0A0  C1723  1 <> 1 0 0 0 0 0 0 <> <> 0 1726 <> 0 0 1 <> <> <> <> <>
  1727 15 53.558777 64.223042 12.955440 135 A A 70 -0.50000 -0.50000 "ALA " " O  " "    " 8 0 0 0 FF2F2F  O1724  1 <> 1 0 0 0 0 0 0 <> <> 0 1727 <> 0 0 1 <> <> <> <> <>
  1728 3 52.362462 62.621149 10.214208 135 A A 2 -0.18000 -0.18000 "ALA " " CB " "    " 6 0 0 0 A0A0A0  C1725  1 <> 1 0 0 0 0 0 0 <> <> 0 1728 <> 0 0 1 <> <> <> <> <>
  1729 43 50.262329 62.068794 11.390881 135 A A 21 0.30000 0.30000 "ALA " " H  " "    " 1 0 0 0 FFFFFF  H1726  1 <> 1 0 0 0 0 0 0 <> <> 0 1729 <> 0 0 1 <> <> <> <> <>
  1730 41 53.004910 61.945459 12.169916 135 A A 21 0.06000 0.06000 "ALA " " HA " "    " 1 0 0 0 FFFFFF  H1727  1 <> 1 0 0 0 0 0 0 <> <> 0 1730 <> 0 0 1 <> <> <> <> <>
  1731 41 53.343877 62.961338 9.882735 135 A A 21 0.06000 0.06000 "ALA " "1HB " "    " 1 0 0 0 FFFFFF  H1728  1 <> 1 0 0 0 0 0 0 <> <> 0 1731 <> 0 0 1 <> <> <> <> <>
  1732 41 52.211173 61.620936 9.807854 135 A A 21 0.06000 0.06000 "ALA " "2HB " "    " 1 0 0 0 FFFFFF  H1729  1 <> 1 0 0 0 0 0 0 <> <> 0 1732 <> 0 0 1 <> <> <> <> <>
  1733 41 51.617892 63.271515 9.754530 135 A A 21 0.06000 0.06000 "ALA " "3HB " "    " 1 0 0 0 FFFFFF  H1730  1 <> 1 0 0 0 0 0 0 <> <> 0 1733 <> 0 0 1 <> <> <> <> <>
  1734 25 51.650681 64.980254 12.008316 136 R A 43 -0.50000 -0.50000 "ARG " " N  " "    " 7 0 0 0 5757FF  N1731  1 <> 1 0 0 0 0 0 0 <> <> 0 1734 <> 0 0 1 <> <> <> <> <>
  1735 3 51.743689 66.376949 12.428124 136 R A 2 0.14000 0.14000 "ARG " " CA " "    " 6 0 0 0 A0A0A0  C1732  1 <> 1 0 0 0 0 0 0 <> <> 0 1735 <> 0 0 1 <> <> <> <> <>
  1736 2 51.988133 66.516664 13.936895 136 R A 2 0.50000 0.50000 "ARG " " C  " "    " 6 0 0 0 A0A0A0  C1733  1 <> 1 0 0 0 0 0 0 <> <> 0 1736 <> 0 0 1 <> <> <> <> <>
  1737 15 52.867221 67.284181 14.319243 136 R A 70 -0.50000 -0.50000 "ARG " " O  " "    " 8 0 0 0 FF2F2F  O1734  1 <> 1 0 0 0 0 0 0 <> <> 0 1737 <> 0 0 1 <> <> <> <> <>
  1738 3 50.505981 67.168665 11.944638 136 R A 2 -0.12000 -0.12000 "ARG " " CB " "    " 6 0 0 0 A0A0A0  C1735  1 <> 1 0 0 0 0 0 0 <> <> 0 1738 <> 0 0 1 <> <> <> <> <>
  1739 3 50.421254 68.646953 12.368146 136 R A 2 -0.05000 -0.05000 "ARG " " CG " "    " 6 0 0 0 A0A0A0  C1736  1 <> 1 0 0 0 0 0 0 <> <> 0 1739 <> 0 0 1 <> <> <> <> <>
  1740 3 51.508859 69.532464 11.746033 136 R A 2 0.19000 0.19000 "ARG " " CD " "    " 6 0 0 0 A0A0A0  C1737  1 <> 1 0 0 0 0 0 0 <> <> 0 1740 <> 0 0 1 <> <> <> <> <>
  1741 25 51.664228 70.767294 12.512082 136 R A 43 -0.69997 -0.69997 "ARG " " NE " "    " 7 0 0 0 5757FF  N1738  1 <> 1 0 0 0 0 0 0 <> <> 0 1741 <> 0 0 1 <> <> <> <> <>
  1742 2 52.526025 71.021670 13.498281 136 R A 2 0.63990 0.63990 "ARG " " CZ " "    " 6 0 0 0 A0A0A0  C1739  1 <> 1 0 0 0 0 0 0 <> <> 0 1742 <> 0 0 1 <> <> <> <> <>
  1743 25 53.343531 70.096592 13.988530 136 R A 43 -0.79997 -0.79997 "ARG " " NH1" "    " 7 0 0 0 5757FF  N1740  1 <> 1 0 0 0 0 0 0 <> <> 0 1743 <> 0 0 1 <> <> <> <> <>
  1744 31 52.571887 72.223258 14.051093 136 R A 43 -0.79997 -0.79997 "ARG " " NH2" "    " 7 1 0 0 5757FF  N1741  1 <> 1 0 0 0 0 0 0 <> <> 0 1744 <> 0 0 1 <> <> <> <> <>
  1745 43 50.858005 64.729311 11.416301 136 R A 21 0.30000 0.30000 "ARG " " H  " "    " 1 0 0 0 FFFFFF  H1742  1 <> 1 0 0 0 0 0 0 <> <> 0 1745 <> 0 0 1 <> <> <> <> <>
  1746 41 52.625251 66.776450 11.924762 136 R A 21 0.06000 0.06000 "ARG " " HA " "    " 1 0 0 0 FFFFFF  H1743  1 <> 1 0 0 0 0 0 0 <> <> 0 1746 <> 0 0 1 <> <> <> <> <>
  1747 41 50.436323 67.113032 10.857548 136 R A 21 0.06000 0.06000 "ARG " "1HB " "    " 1 0 0 0 FFFFFF  H1744  1 <> 1 0 0 0 0 0 0 <> <> 0 1747 <> 0 0 1 <> <> <> <> <>
  1748 41 49.619748 66.677056 12.332790 136 R A 21 0.06000 0.06000 "ARG " "2HB " "    " 1 0 0 0 FFFFFF  H1745  1 <> 1 0 0 0 0 0 0 <> <> 0 1748 <> 0 0 1 <> <> <> <> <>
  1749 41 49.449620 69.038950 12.061378 136 R A 21 0.06000 0.06000 "ARG " "1HG " "    " 1 0 0 0 FFFFFF  H1746  1 <> 1 0 0 0 0 0 0 <> <> 0 1749 <> 0 0 1 <> <> <> <> <>
  1750 41 50.430861 68.735110 13.454928 136 R A 21 0.06000 0.06000 "ARG " "2HG " "    " 1 0 0 0 FFFFFF  H1747  1 <> 1 0 0 0 0 0 0 <> <> 0 1750 <> 0 0 1 <> <> <> <> <>
  1751 41 52.474256 69.031700 11.700188 136 R A 21 0.06000 0.06000 "ARG " "1HD " "    " 1 0 0 0 FFFFFF  H1748  1 <> 1 0 0 0 0 0 0 <> <> 0 1751 <> 0 0 1 <> <> <> <> <>
  1752 41 51.242059 69.785680 10.718843 136 R A 21 0.06000 0.06000 "ARG " "2HD " "    " 1 0 0 0 FFFFFF  H1749  1 <> 1 0 0 0 0 0 0 <> <> 0 1752 <> 0 0 1 <> <> <> <> <>
  1753 43 50.959628 71.526030 12.273986 136 R A 21 0.44000 0.44000 "ARG " " HE " "    " 1 0 0 0 FFFFFF  H1750  1 <> 1 0 0 0 0 0 0 <> <> 0 1753 <> 0 0 1 <> <> <> <> <>
  1754 43 53.855464 70.377121 14.847132 136 R A 21 0.46000 0.46000 "ARG " "1HH1" "    " 1 0 0 0 FFFFFF  H1751  1 <> 1 0 0 0 0 0 0 <> <> 0 1754 <> 0 0 1 <> <> <> <> <>
  1755 43 53.237038 69.104048 13.808938 136 R A 21 0.46000 0.46000 "ARG " "2HH1" "    " 1 0 0 0 FFFFFF  H1752  1 <> 1 0 0 0 0 0 0 <> <> 0 1755 <> 0 0 1 <> <> <> <> <>
  1756 44 53.197368 72.386237 14.835104 136 R A 21 0.46000 0.46000 "ARG " "1HH2" "    " 1 0 0 0 FFFFFF  H1753  1 <> 1 0 0 0 0 0 0 <> <> 0 1756 <> 0 0 1 <> <> <> <> <>
  1757 44 51.883289 72.963869 13.764895 136 R A 21 0.46000 0.46000 "ARG " "2HH2" "    " 1 0 0 0 FFFFFF  H1754  1 <> 1 0 0 0 0 0 0 <> <> 0 1757 <> 0 0 1 <> <> <> <> <>
  1758 25 51.276590 65.727510 14.755938 137 F A 43 -0.50000 -0.50000 "PHE " " N  " "    " 7 0 0 0 5757FF  N1755  1 <> 1 0 0 0 0 0 0 <> <> 0 1758 <> 0 0 1 <> <> <> <> <>
  1759 3 51.444124 65.635650 16.204899 137 F A 2 0.14000 0.14000 "PHE " " CA " "    " 6 0 0 0 A0A0A0  C1756  1 <> 1 0 0 0 0 0 0 <> <> 0 1759 <> 0 0 1 <> <> <> <> <>
  1760 2 52.777329 64.962251 16.573700 137 F A 2 0.50000 0.50000 "PHE " " C  " "    " 6 0 0 0 A0A0A0  C1757  1 <> 1 0 0 0 0 0 0 <> <> 0 1760 <> 0 0 1 <> <> <> <> <>
  1761 15 53.523504 65.510567 17.382311 137 F A 70 -0.50000 -0.50000 "PHE " " O  " "    " 8 0 0 0 FF2F2F  O1758  1 <> 1 0 0 0 0 0 0 <> <> 0 1761 <> 0 0 1 <> <> <> <> <>
  1762 3 50.258974 64.835592 16.789538 137 F A 2 -0.00500 -0.00500 "PHE " " CB " "    " 6 0 0 0 A0A0A0  C1759  1 <> 1 0 0 0 0 0 0 <> <> 0 1762 <> 0 0 1 <> <> <> <> <>
  1763 2 50.223214 64.662573 18.303026 137 F A 2 -0.11500 -0.11500 "PHE " " CG " "    " 6 0 0 0 A0A0A0  C1760  1 <> 1 0 0 0 0 0 0 <> <> 0 1763 <> 0 0 1 <> <> <> <> <>
  1764 2 50.176798 65.783084 19.158661 137 F A 2 -0.11500 -0.11500 "PHE " " CD1" "    " 6 0 0 0 A0A0A0  C1761  1 <> 1 0 0 0 0 0 0 <> <> 0 1764 <> 0 0 1 <> <> <> <> <>
  1765 2 50.212924 63.369464 18.862967 137 F A 2 -0.11500 -0.11500 "PHE " " CD2" "    " 6 0 0 0 A0A0A0  C1762  1 <> 1 0 0 0 0 0 0 <> <> 0 1765 <> 0 0 1 <> <> <> <> <>
  1766 2 50.114147 65.614706 20.553834 137 F A 2 -0.11500 -0.11500 "PHE " " CE1" "    " 6 0 0 0 A0A0A0  C1763  1 <> 1 0 0 0 0 0 0 <> <> 0 1766 <> 0 0 1 <> <> <> <> <>
  1767 2 50.142923 63.196613 20.257926 137 F A 2 -0.11500 -0.11500 "PHE " " CE2" "    " 6 0 0 0 A0A0A0  C1764  1 <> 1 0 0 0 0 0 0 <> <> 0 1767 <> 0 0 1 <> <> <> <> <>
  1768 2 50.102301 64.320054 21.103026 137 F A 2 -0.11500 -0.11500 "PHE " " CZ " "    " 6 0 0 0 A0A0A0  C1765  1 <> 1 0 0 0 0 0 0 <> <> 0 1768 <> 0 0 1 <> <> <> <> <>
  1769 43 50.563121 65.139417 14.334201 137 F A 21 0.30000 0.30000 "PHE " " H  " "    " 1 0 0 0 FFFFFF  H1766  1 <> 1 0 0 0 0 0 0 <> <> 0 1769 <> 0 0 1 <> <> <> <> <>
  1770 41 51.444548 66.644264 16.618203 137 F A 21 0.06000 0.06000 "PHE " " HA " "    " 1 0 0 0 FFFFFF  H1767  1 <> 1 0 0 0 0 0 0 <> <> 0 1770 <> 0 0 1 <> <> <> <> <>
  1771 41 49.326736 65.321394 16.502281 137 F A 21 0.06000 0.06000 "PHE " "1HB " "    " 1 0 0 0 FFFFFF  H1768  1 <> 1 0 0 0 0 0 0 <> <> 0 1771 <> 0 0 1 <> <> <> <> <>
  1772 41 50.225120 63.849713 16.322721 137 F A 21 0.06000 0.06000 "PHE " "2HB " "    " 1 0 0 0 FFFFFF  H1769  1 <> 1 0 0 0 0 0 0 <> <> 0 1772 <> 0 0 1 <> <> <> <> <>
  1773 41 50.198916 66.781202 18.756030 137 F A 21 0.11500 0.11500 "PHE " " HD1" "    " 1 0 0 0 FFFFFF  H1770  1 <> 1 0 0 0 0 0 0 <> <> 0 1773 <> 0 0 1 <> <> <> <> <>
  1774 41 50.235775 62.502303 18.223517 137 F A 21 0.11500 0.11500 "PHE " " HD2" "    " 1 0 0 0 FFFFFF  H1771  1 <> 1 0 0 0 0 0 0 <> <> 0 1774 <> 0 0 1 <> <> <> <> <>
  1775 41 50.083530 66.480727 21.199372 137 F A 21 0.11500 0.11500 "PHE " " HE1" "    " 1 0 0 0 FFFFFF  H1772  1 <> 1 0 0 0 0 0 0 <> <> 0 1775 <> 0 0 1 <> <> <> <> <>
  1776 41 50.128001 62.200174 20.676274 137 F A 21 0.11500 0.11500 "PHE " " HE2" "    " 1 0 0 0 FFFFFF  H1773  1 <> 1 0 0 0 0 0 0 <> <> 0 1776 <> 0 0 1 <> <> <> <> <>
  1777 41 50.075865 64.190485 22.172982 137 F A 21 0.11500 0.11500 "PHE " " HZ " "    " 1 0 0 0 FFFFFF  H1774  1 <> 1 0 0 0 0 0 0 <> <> 0 1777 <> 0 0 1 <> <> <> <> <>
  1778 25 53.119068 63.816037 15.958395 138 Y A 43 -0.50000 -0.50000 "TYR " " N  " "    " 7 0 0 0 5757FF  N1775  1 <> 1 0 0 0 0 0 0 <> <> 0 1778 <> 0 0 1 <> <> <> <> <>
  1779 3 54.369150 63.077368 16.190013 138 Y A 2 0.14000 0.14000 "TYR " " CA " "    " 6 0 0 0 A0A0A0  C1776  1 <> 1 0 0 0 0 0 0 <> <> 0 1779 <> 0 0 1 <> <> <> <> <>
  1780 2 55.624243 63.940603 15.981414 138 Y A 2 0.50000 0.50000 "TYR " " C  " "    " 6 0 0 0 A0A0A0  C1777  1 <> 1 0 0 0 0 0 0 <> <> 0 1780 <> 0 0 1 <> <> <> <> <>
  1781 15 56.557191 63.873038 16.780268 138 Y A 70 -0.50000 -0.50000 "TYR " " O  " "    " 8 0 0 0 FF2F2F  O1778  1 <> 1 0 0 0 0 0 0 <> <> 0 1781 <> 0 0 1 <> <> <> <> <>
  1782 3 54.417171 61.808130 15.311956 138 Y A 2 -0.00500 -0.00500 "TYR " " CB " "    " 6 0 0 0 A0A0A0  C1779  1 <> 1 0 0 0 0 0 0 <> <> 0 1782 <> 0 0 1 <> <> <> <> <>
  1783 2 55.671069 60.953485 15.454671 138 Y A 2 -0.11500 -0.11500 "TYR " " CG " "    " 6 0 0 0 A0A0A0  C1780  1 <> 1 0 0 0 0 0 0 <> <> 0 1783 <> 0 0 1 <> <> <> <> <>
  1784 2 55.862808 60.151300 16.598070 138 Y A 2 -0.11500 -0.11500 "TYR " " CD1" "    " 6 0 0 0 A0A0A0  C1781  1 <> 1 0 0 0 0 0 0 <> <> 0 1784 <> 0 0 1 <> <> <> <> <>
  1785 2 57.007733 59.337935 16.708469 138 Y A 2 -0.11500 -0.11500 "TYR " " CE1" "    " 6 0 0 0 A0A0A0  C1782  1 <> 1 0 0 0 0 0 0 <> <> 0 1785 <> 0 0 1 <> <> <> <> <>
  1786 2 56.660194 60.972121 14.448219 138 Y A 2 -0.11500 -0.11500 "TYR " " CD2" "    " 6 0 0 0 A0A0A0  C1783  1 <> 1 0 0 0 0 0 0 <> <> 0 1786 <> 0 0 1 <> <> <> <> <>
  1787 2 57.801854 60.155878 14.555004 138 Y A 2 -0.11500 -0.11500 "TYR " " CE2" "    " 6 0 0 0 A0A0A0  C1784  1 <> 1 0 0 0 0 0 0 <> <> 0 1787 <> 0 0 1 <> <> <> <> <>
  1788 2 57.969983 59.328291 15.682100 138 Y A 2 0.15000 0.15000 "TYR " " CZ " "    " 6 0 0 0 A0A0A0  C1785  1 <> 1 0 0 0 0 0 0 <> <> 0 1788 <> 0 0 1 <> <> <> <> <>
  1789 16 59.061829 58.519043 15.789471 138 Y A 70 -0.58500 -0.58500 "TYR " " OH " "    " 8 0 0 0 FF2F2F  O1786  1 <> 1 0 0 0 0 0 0 <> <> 0 1789 <> 0 0 1 <> <> <> <> <>
  1790 43 52.482197 63.441302 15.262604 138 Y A 21 0.30000 0.30000 "TYR " " H  " "    " 1 0 0 0 FFFFFF  H1787  1 <> 1 0 0 0 0 0 0 <> <> 0 1790 <> 0 0 1 <> <> <> <> <>
  1791 41 54.372706 62.764118 17.233277 138 Y A 21 0.06000 0.06000 "TYR " " HA " "    " 1 0 0 0 FFFFFF  H1788  1 <> 1 0 0 0 0 0 0 <> <> 0 1791 <> 0 0 1 <> <> <> <> <>
  1792 41 53.560927 61.174385 15.541541 138 Y A 21 0.06000 0.06000 "TYR " "1HB " "    " 1 0 0 0 FFFFFF  H1789  1 <> 1 0 0 0 0 0 0 <> <> 0 1792 <> 0 0 1 <> <> <> <> <>
  1793 41 54.302762 62.081776 14.263166 138 Y A 21 0.06000 0.06000 "TYR " "2HB " "    " 1 0 0 0 FFFFFF  H1790  1 <> 1 0 0 0 0 0 0 <> <> 0 1793 <> 0 0 1 <> <> <> <> <>
  1794 41 55.134956 60.163370 17.394847 138 Y A 21 0.11500 0.11500 "TYR " " HD1" "    " 1 0 0 0 FFFFFF  H1791  1 <> 1 0 0 0 0 0 0 <> <> 0 1794 <> 0 0 1 <> <> <> <> <>
  1795 41 57.148809 58.714718 17.578526 138 Y A 21 0.11500 0.11500 "TYR " " HE1" "    " 1 0 0 0 FFFFFF  H1792  1 <> 1 0 0 0 0 0 0 <> <> 0 1795 <> 0 0 1 <> <> <> <> <>
  1796 41 56.550013 61.618375 13.588663 138 Y A 21 0.11500 0.11500 "TYR " " HD2" "    " 1 0 0 0 FFFFFF  H1793  1 <> 1 0 0 0 0 0 0 <> <> 0 1796 <> 0 0 1 <> <> <> <> <>
  1797 41 58.535039 60.174528 13.762154 138 Y A 21 0.11500 0.11500 "TYR " " HE2" "    " 1 0 0 0 FFFFFF  H1794  1 <> 1 0 0 0 0 0 0 <> <> 0 1797 <> 0 0 1 <> <> <> <> <>
  1798 42 59.737260 58.726238 15.161190 138 Y A 21 0.43500 0.43500 "TYR " " HH " "    " 1 0 0 0 FFFFFF  H1795  1 <> 1 0 0 0 0 0 0 <> <> 0 1798 <> 0 0 1 <> <> <> <> <>
  1799 25 55.633928 64.777351 14.939743 139 H A 43 -0.50000 -0.50000 "HIS " " N  " "    " 7 0 0 0 5757FF  N1796  0 <> 1 0 0 0 0 0 0 <> <> 0 1799 <> 0 0 1 <> <> <> <> <>
  1800 3 56.753130 65.663430 14.630956 139 H A 2 0.14000 0.14000 "HIS " " CA " "    " 6 0 0 0 A0A0A0  C1797  0 <> 1 0 0 0 0 0 0 <> <> 0 1800 <> 0 0 1 <> <> <> <> <>
  1801 2 56.774058 66.926083 15.524959 139 H A 2 0.50000 0.50000 "HIS " " C  " "    " 6 0 0 0 A0A0A0  C1798  0 <> 1 0 0 0 0 0 0 <> <> 0 1801 <> 0 0 1 <> <> <> <> <>
  1802 15 57.848825 67.486557 15.723950 139 H A 70 -0.50000 -0.50000 "HIS " " O  " "    " 8 0 0 0 FF2F2F  O1799  0 <> 1 0 0 0 0 0 0 <> <> 0 1802 <> 0 0 1 <> <> <> <> <>
  1803 3 56.692286 66.044713 13.134239 139 H A 2 -0.00500 -0.00500 "HIS " " CB " "    " 6 0 0 0 A0A0A0  C1800  0 <> 1 0 0 0 0 0 0 <> <> 0 1803 <> 0 0 1 <> <> <> <> <>
  1804 2 56.806459 64.866153 12.179706 139 H A 2 0.01500 0.01500 "HIS " " CG " "    " 6 0 0 0 A0A0A0  C1801  0 <> 1 0 0 0 0 0 0 <> <> 0 1804 <> 0 0 1 <> <> <> <> <>
  1805 2 55.980813 64.424073 11.167523 139 H A 2 -0.01500 -0.01500 "HIS " " CD2" "    " 6 0 0 0 A0A0A0  C1802  0 <> 1 0 0 0 0 0 0 <> <> 0 1805 <> 0 0 1 <> <> <> <> <>
  1806 25 57.868922 63.972046 12.187464 139 H A 43 -0.57000 -0.57000 "HIS " " ND1" "    " 7 0 0 0 5757FF  N1803  0 <> 1 0 0 0 0 0 0 <> <> 0 1806 <> 0 0 1 <> <> <> <> <>
  1807 2 57.637284 63.055160 11.242220 139 H A 2 0.29500 0.29500 "HIS " " CE1" "    " 6 0 0 0 A0A0A0  C1804  0 <> 1 0 0 0 0 0 0 <> <> 0 1807 <> 0 0 1 <> <> <> <> <>
  1808 25 56.496418 63.256235 10.596680 139 H A 43 -0.49000 -0.49000 "HIS " " NE2" "    " 7 0 0 0 5757FF  N1805  0 <> 1 0 0 0 0 0 0 <> <> 0 1808 <> 0 0 1 <> <> <> <> <>
  1809 43 54.849636 64.742994 14.290870 139 H A 21 0.30000 0.30000 "HIS " " H  " "    " 1 0 0 0 FFFFFF  H1806  0 <> 1 0 0 0 0 0 0 <> <> 0 1809 <> 0 0 1 <> <> <> <> <>
  1810 41 57.688894 65.130771 14.808680 139 H A 21 0.06000 0.06000 "HIS " " HA " "    " 1 0 0 0 FFFFFF  H1807  0 <> 1 0 0 0 0 0 0 <> <> 0 1810 <> 0 0 1 <> <> <> <> <>
  1811 41 55.760541 66.572171 12.921230 139 H A 21 0.06000 0.06000 "HIS " "1HB " "    " 1 0 0 0 FFFFFF  H1808  0 <> 1 0 0 0 0 0 0 <> <> 0 1811 <> 0 0 1 <> <> <> <> <>
  1812 41 57.495131 66.745301 12.898599 139 H A 21 0.06000 0.06000 "HIS " "2HB " "    " 1 0 0 0 FFFFFF  H1809  0 <> 1 0 0 0 0 0 0 <> <> 0 1812 <> 0 0 1 <> <> <> <> <>
  1813 41 55.046797 64.844530 10.821445 139 H A 21 0.11500 0.11500 "HIS " " HD2" "    " 1 0 0 0 FFFFFF  H1810  0 <> 1 0 0 0 0 0 0 <> <> 0 1813 <> 0 0 1 <> <> <> <> <>
  1814 43 58.693740 64.019268 12.765991 139 H A 21 0.42000 0.42000 "HIS " " HD1" "    " 1 0 0 0 FFFFFF  H1811  0 <> 1 0 0 0 0 0 0 <> <> 0 1814 <> 0 0 1 <> <> <> <> <>
  1815 41 58.302168 62.230840 11.021018 139 H A 21 0.11500 0.11500 "HIS " " HE1" "    " 1 0 0 0 FFFFFF  H1812  0 <> 1 0 0 0 0 0 0 <> <> 0 1815 <> 0 0 1 <> <> <> <> <>
  1816 25 55.637485 67.329936 16.118091 140 D A 43 -0.50000 -0.50000 "ASP " " N  " "    " 7 0 0 0 5757FF  N1813  0 <> 1 0 0 0 0 0 0 <> <> 0 1816 <> 0 0 1 <> <> <> <> <>
  1817 3 55.499731 68.501652 17.009918 140 D A 2 0.14000 0.14000 "ASP " " CA " "    " 6 0 0 0 A0A0A0  C1814  0 <> 1 0 0 0 0 0 0 <> <> 0 1817 <> 0 0 1 <> <> <> <> <>
  1818 2 55.860575 68.176133 18.469830 140 D A 2 0.50000 0.50000 "ASP " " C  " "    " 6 0 0 0 A0A0A0  C1815  0 <> 1 0 0 0 0 0 0 <> <> 0 1818 <> 0 0 1 <> <> <> <> <>
  1819 15 56.185988 69.063853 19.254185 140 D A 70 -0.50000 -0.50000 "ASP " " O  " "    " 8 0 0 0 FF2F2F  O1816  0 <> 1 0 0 0 0 0 0 <> <> 0 1819 <> 0 0 1 <> <> <> <> <>
  1820 3 54.001640 68.892073 17.063634 140 D A 2 -0.22000 -0.22000 "ASP " " CB " "    " 6 0 0 0 A0A0A0  C1817  0 <> 1 0 0 0 0 0 0 <> <> 0 1820 <> 0 0 1 <> <> <> <> <>
  1821 2 53.711965 70.378428 17.222030 140 D A 2 0.70000 0.70000 "ASP " " CG " "    " 6 0 0 0 A0A0A0  C1818  0 <> 1 0 0 0 0 0 0 <> <> 0 1821 <> 0 0 1 <> <> <> <> <>
  1822 18 54.075619 71.140741 16.303072 140 D A 70 -0.80000 -0.80000 "ASP " " OD1" "    " 8 -1 0 0 FF2F2F  O1819  0 <> 1 0 0 0 0 0 0 <> <> 0 1822 <> 0 0 1 <> <> <> <> <>
  1823 15 52.879918 70.703527 18.100978 140 D A 70 -0.80000 -0.80000 "ASP " " OD2" "    " 8 0 0 0 FF2F2F  O1820  0 <> 1 0 0 0 0 0 0 <> <> 0 1823 <> 0 0 1 <> <> <> <> <>
  1824 43 54.801538 66.786912 15.945711 140 D A 21 0.30000 0.30000 "ASP " " H  " "    " 1 0 0 0 FFFFFF  H1821  0 <> 1 0 0 0 0 0 0 <> <> 0 1824 <> 0 0 1 <> <> <> <> <>
  1825 41 56.113072 69.327740 16.642431 140 D A 21 0.06000 0.06000 "ASP " " HA " "    " 1 0 0 0 FFFFFF  H1822  0 <> 1 0 0 0 0 0 0 <> <> 0 1825 <> 0 0 1 <> <> <> <> <>
  1826 41 53.504985 68.610384 16.148549 140 D A 21 0.06000 0.06000 "ASP " "1HB " "    " 1 0 0 0 FFFFFF  H1823  0 <> 1 0 0 0 0 0 0 <> <> 0 1826 <> 0 0 1 <> <> <> <> <>
  1827 41 53.470280 68.330710 17.834292 140 D A 21 0.06000 0.06000 "ASP " "2HB " "    " 1 0 0 0 FFFFFF  H1824  0 <> 1 0 0 0 0 0 0 <> <> 0 1827 <> 0 0 1 <> <> <> <> <>
  1828 25 55.695775 66.903603 18.849469 141 L A 43 -0.50000 -0.50000 "LEU " " N  " "    " 7 0 0 0 5757FF  N1825  0 <> 1 0 0 0 0 0 0 <> <> 0 1828 <> 0 0 1 <> <> <> <> <>
  1829 3 55.688794 66.405145 20.219305 141 L A 2 0.14000 0.14000 "LEU " " CA " "    " 6 0 0 0 A0A0A0  C1826  0 <> 1 0 0 0 0 0 0 <> <> 0 1829 <> 0 0 1 <> <> <> <> <>
  1830 2 57.030825 66.528430 20.962769 141 L A 2 0.50000 0.50000 "LEU " " C  " "    " 6 0 0 0 A0A0A0  C1827  0 <> 1 0 0 0 0 0 0 <> <> 0 1830 <> 0 0 1 <> <> <> <> <>
  1831 15 58.087577 66.752538 20.374415 141 L A 70 -0.50000 -0.50000 "LEU " " O  " "    " 8 0 0 0 FF2F2F  O1828  0 <> 1 0 0 0 0 0 0 <> <> 0 1831 <> 0 0 1 <> <> <> <> <>
  1832 3 55.278518 64.910029 20.183605 141 L A 2 -0.12000 -0.12000 "LEU " " CB " "    " 6 0 0 0 A0A0A0  C1829  0 <> 1 0 0 0 0 0 0 <> <> 0 1832 <> 0 0 1 <> <> <> <> <>
  1833 3 53.812730 64.614868 20.543256 141 L A 2 -0.06000 -0.06000 "LEU " " CG " "    " 6 0 0 0 A0A0A0  C1830  0 <> 1 0 0 0 0 0 0 <> <> 0 1833 <> 0 0 1 <> <> <> <> <>
  1834 3 53.555773 63.111316 20.348955 141 L A 2 -0.18000 -0.18000 "LEU " " CD1" "    " 6 0 0 0 A0A0A0  C1831  0 <> 1 0 0 0 0 0 0 <> <> 0 1834 <> 0 0 1 <> <> <> <> <>
  1835 3 53.447877 65.102963 21.959198 141 L A 2 -0.18000 -0.18000 "LEU " " CD2" "    " 6 0 0 0 A0A0A0  C1832  0 <> 1 0 0 0 0 0 0 <> <> 0 1835 <> 0 0 1 <> <> <> <> <>
  1836 43 55.325875 66.288608 18.135336 141 L A 21 0.30000 0.30000 "LEU " " H  " "    " 1 0 0 0 FFFFFF  H1833  0 <> 1 0 0 0 0 0 0 <> <> 0 1836 <> 0 0 1 <> <> <> <> <>
  1837 41 54.962694 67.002048 20.771132 141 L A 21 0.06000 0.06000 "LEU " " HA " "    " 1 0 0 0 FFFFFF  H1834  0 <> 1 0 0 0 0 0 0 <> <> 0 1837 <> 0 0 1 <> <> <> <> <>
  1838 41 55.492219 64.495797 19.197046 141 L A 21 0.06000 0.06000 "LEU " "1HB " "    " 1 0 0 0 FFFFFF  H1835  0 <> 1 0 0 0 0 0 0 <> <> 0 1838 <> 0 0 1 <> <> <> <> <>
  1839 41 55.896484 64.315842 20.858698 141 L A 21 0.06000 0.06000 "LEU " "2HB " "    " 1 0 0 0 FFFFFF  H1836  0 <> 1 0 0 0 0 0 0 <> <> 0 1839 <> 0 0 1 <> <> <> <> <>
  1840 41 53.154549 65.143662 19.852918 141 L A 21 0.06000 0.06000 "LEU " " HG " "    " 1 0 0 0 FFFFFF  H1837  0 <> 1 0 0 0 0 0 0 <> <> 0 1840 <> 0 0 1 <> <> <> <> <>
  1841 41 52.639512 62.784236 20.832294 141 L A 21 0.06000 0.06000 "LEU " "1HD1" "    " 1 0 0 0 FFFFFF  H1838  0 <> 1 0 0 0 0 0 0 <> <> 0 1841 <> 0 0 1 <> <> <> <> <>
  1842 41 53.456117 62.873189 19.291092 141 L A 21 0.06000 0.06000 "LEU " "2HD1" "    " 1 0 0 0 FFFFFF  H1839  0 <> 1 0 0 0 0 0 0 <> <> 0 1842 <> 0 0 1 <> <> <> <> <>
  1843 41 54.368363 62.502506 20.740051 141 L A 21 0.06000 0.06000 "LEU " "3HD1" "    " 1 0 0 0 FFFFFF  H1840  0 <> 1 0 0 0 0 0 0 <> <> 0 1843 <> 0 0 1 <> <> <> <> <>
  1844 41 52.569368 64.591034 22.349782 141 L A 21 0.06000 0.06000 "LEU " "1HD2" "    " 1 0 0 0 FFFFFF  H1841  0 <> 1 0 0 0 0 0 0 <> <> 0 1844 <> 0 0 1 <> <> <> <> <>
  1845 41 54.259571 64.967491 22.669600 141 L A 21 0.06000 0.06000 "LEU " "2HD2" "    " 1 0 0 0 FFFFFF  H1842  0 <> 1 0 0 0 0 0 0 <> <> 0 1845 <> 0 0 1 <> <> <> <> <>
  1846 41 53.205827 66.166086 21.950470 141 L A 21 0.06000 0.06000 "LEU " "3HD2" "    " 1 0 0 0 FFFFFF  H1843  0 <> 1 0 0 0 0 0 0 <> <> 0 1846 <> 0 0 1 <> <> <> <> <>
  1847 25 56.985793 66.231035 22.264749 142 G A 43 -0.50000 -0.50000 "GLY " " N  " "    " 7 0 0 0 5757FF  N1844  0 <> 1 0 0 0 0 0 0 <> <> 0 1847 <> 0 0 1 <> <> <> <> <>
  1848 3 58.146145 66.077383 23.126567 142 G A 2 0.08000 0.08000 "GLY " " CA " "    " 6 0 0 0 A0A0A0  C1845  0 <> 1 0 0 0 0 0 0 <> <> 0 1848 <> 0 0 1 <> <> <> <> <>
  1849 2 58.336569 64.586110 23.412075 142 G A 2 0.50000 0.50000 "GLY " " C  " "    " 6 0 0 0 A0A0A0  C1846  0 <> 1 0 0 0 0 0 0 <> <> 0 1849 <> 0 0 1 <> <> <> <> <>
  1850 15 57.372897 63.869524 23.703494 142 G A 70 -0.50000 -0.50000 "GLY " " O  " "    " 8 0 0 0 FF2F2F  O1847  0 <> 1 0 0 0 0 0 0 <> <> 0 1850 <> 0 0 1 <> <> <> <> <>
  1851 43 56.092941 65.979659 22.656664 142 G A 21 0.30000 0.30000 "GLY " " H  " "    " 1 0 0 0 FFFFFF  H1848  0 <> 1 0 0 0 0 0 0 <> <> 0 1851 <> 0 0 1 <> <> <> <> <>
  1852 41 59.046058 66.517992 22.690011 142 G A 21 0.06000 0.06000 "GLY " "1HA " "    " 1 0 0 0 FFFFFF  H1849  0 <> 1 0 0 0 0 0 0 <> <> 0 1852 <> 0 0 1 <> <> <> <> <>
  1853 41 57.965951 66.599772 24.065749 142 G A 21 0.06000 0.06000 "GLY " "2HA " "    " 1 0 0 0 FFFFFF  H1850  0 <> 1 0 0 0 0 0 0 <> <> 0 1853 <> 0 0 1 <> <> <> <> <>
  1854 25 59.587057 64.141681 23.275747 143 E A 43 -0.50000 -0.50000 "GLU " " N  " "    " 7 0 0 0 5757FF  N1851  1 <> 1 0 0 0 0 0 0 <> <> 0 1854 <> 0 0 1 <> <> <> <> <>
  1855 3 60.180060 62.808805 23.187881 143 E A 2 0.14000 0.14000 "GLU " " CA " "    " 6 0 0 0 A0A0A0  C1852  1 <> 1 0 0 0 0 0 0 <> <> 0 1855 <> 0 0 1 <> <> <> <> <>
  1856 2 59.516666 61.687642 24.004970 143 E A 2 0.50000 0.50000 "GLU " " C  " "    " 6 0 0 0 A0A0A0  C1853  1 <> 1 0 0 0 0 0 0 <> <> 0 1856 <> 0 0 1 <> <> <> <> <>
  1857 15 59.376908 60.578692 23.493241 143 E A 70 -0.50000 -0.50000 "GLU " " O  " "    " 8 0 0 0 FF2F2F  O1854  1 <> 1 0 0 0 0 0 0 <> <> 0 1857 <> 0 0 1 <> <> <> <> <>
  1858 3 61.712379 62.940661 23.361822 143 E A 2 -0.12000 -0.12000 "GLU " " CB " "    " 6 0 0 0 A0A0A0  C1855  1 <> 1 0 0 0 0 0 0 <> <> 0 1858 <> 0 0 1 <> <> <> <> <>
  1859 3 62.506423 63.290476 22.069672 143 E A 2 -0.22000 -0.22000 "GLU " " CG " "    " 6 0 0 0 A0A0A0  C1856  1 <> 1 0 0 0 0 0 0 <> <> 0 1859 <> 0 0 1 <> <> <> <> <>
  1860 2 61.967040 64.439524 21.213750 143 E A 2 0.70000 0.70000 "GLU " " CD " "    " 6 0 0 0 A0A0A0  C1857  1 <> 1 0 0 0 0 0 0 <> <> 0 1860 <> 0 0 1 <> <> <> <> <>
  1861 18 61.320281 65.361663 21.751339 143 E A 70 -0.80000 -0.80000 "GLU " " OE1" "    " 8 -1 0 0 FF2F2F  O1858  1 <> 1 0 0 0 0 0 0 <> <> 0 1861 <> 0 0 1 <> <> <> <> <>
  1862 15 62.047441 64.339383 19.972534 143 E A 70 -0.80000 -0.80000 "GLU " " OE2" "    " 8 0 0 0 FF2F2F  O1859  1 <> 1 0 0 0 0 0 0 <> <> 0 1862 <> 0 0 1 <> <> <> <> <>
  1863 43 60.240528 64.833763 22.867914 143 E A 21 0.30000 0.30000 "GLU " " H  " "    " 1 0 0 0 FFFFFF  H1860  1 <> 1 0 0 0 0 0 0 <> <> 0 1863 <> 0 0 1 <> <> <> <> <>
  1864 41 60.027078 62.503657 22.156873 143 E A 21 0.06000 0.06000 "GLU " " HA " "    " 1 0 0 0 FFFFFF  H1861  1 <> 1 0 0 0 0 0 0 <> <> 0 1864 <> 0 0 1 <> <> <> <> <>
  1865 41 61.938748 63.678511 24.132612 143 E A 21 0.06000 0.06000 "GLU " "1HB " "    " 1 0 0 0 FFFFFF  H1862  1 <> 1 0 0 0 0 0 0 <> <> 0 1865 <> 0 0 1 <> <> <> <> <>
  1866 41 62.115055 61.999099 23.737833 143 E A 21 0.06000 0.06000 "GLU " "2HB " "    " 1 0 0 0 FFFFFF  H1863  1 <> 1 0 0 0 0 0 0 <> <> 0 1866 <> 0 0 1 <> <> <> <> <>
  1867 41 63.539616 63.525560 22.324535 143 E A 21 0.06000 0.06000 "GLU " "1HG " "    " 1 0 0 0 FFFFFF  H1864  1 <> 1 0 0 0 0 0 0 <> <> 0 1867 <> 0 0 1 <> <> <> <> <>
  1868 41 62.549457 62.407084 21.432006 143 E A 21 0.06000 0.06000 "GLU " "2HG " "    " 1 0 0 0 FFFFFF  H1865  1 <> 1 0 0 0 0 0 0 <> <> 0 1868 <> 0 0 1 <> <> <> <> <>
  1869 25 59.012776 61.988398 25.212235 144 N A 43 -0.50000 -0.50000 "ASN " " N  " "    " 7 0 0 0 5757FF  N1866  1 <> 1 0 0 0 0 0 0 <> <> 0 1869 <> 0 0 1 <> <> <> <> <>
  1870 3 58.159258 61.124600 26.049454 144 N A 2 0.14000 0.14000 "ASN " " CA " "    " 6 0 0 0 A0A0A0  C1867  1 <> 1 0 0 0 0 0 0 <> <> 0 1870 <> 0 0 1 <> <> <> <> <>
  1871 2 57.005704 60.489230 25.253977 144 N A 2 0.50000 0.50000 "ASN " " C  " "    " 6 0 0 0 A0A0A0  C1868  1 <> 1 0 0 0 0 0 0 <> <> 0 1871 <> 0 0 1 <> <> <> <> <>
  1872 15 56.763994 59.286547 25.334616 144 N A 70 -0.50000 -0.50000 "ASN " " O  " "    " 8 0 0 0 FF2F2F  O1869  1 <> 1 0 0 0 0 0 0 <> <> 0 1872 <> 0 0 1 <> <> <> <> <>
  1873 3 57.621309 61.949650 27.251245 144 N A 2 -0.12000 -0.12000 "ASN " " CB " "    " 6 0 0 0 A0A0A0  C1870  1 <> 1 0 0 0 0 0 0 <> <> 0 1873 <> 0 0 1 <> <> <> <> <>
  1874 2 56.644470 61.192951 28.168299 144 N A 2 0.50000 0.50000 "ASN " " CG " "    " 6 0 0 0 A0A0A0  C1871  1 <> 1 0 0 0 0 0 0 <> <> 0 1874 <> 0 0 1 <> <> <> <> <>
  1875 15 55.431621 61.189805 27.940428 144 N A 70 -0.50000 -0.50000 "ASN " " OD1" "    " 8 0 0 0 FF2F2F  O1872  1 <> 1 0 0 0 0 0 0 <> <> 0 1875 <> 0 0 1 <> <> <> <> <>
  1876 25 57.145925 60.567156 29.226625 144 N A 43 -0.76000 -0.76000 "ASN " " ND2" "    " 7 0 0 0 5757FF  N1873  1 <> 1 0 0 0 0 0 0 <> <> 0 1876 <> 0 0 1 <> <> <> <> <>
  1877 43 59.134670 62.950662 25.490319 144 N A 21 0.30000 0.30000 "ASN " " H  " "    " 1 0 0 0 FFFFFF  H1874  1 <> 1 0 0 0 0 0 0 <> <> 0 1877 <> 0 0 1 <> <> <> <> <>
  1878 41 58.781651 60.310226 26.425093 144 N A 21 0.06000 0.06000 "ASN " " HA " "    " 1 0 0 0 FFFFFF  H1875  1 <> 1 0 0 0 0 0 0 <> <> 0 1878 <> 0 0 1 <> <> <> <> <>
  1879 41 58.455395 62.319896 27.848290 144 N A 21 0.06000 0.06000 "ASN " "1HB " "    " 1 0 0 0 FFFFFF  H1876  1 <> 1 0 0 0 0 0 0 <> <> 0 1879 <> 0 0 1 <> <> <> <> <>
  1880 41 57.102122 62.836464 26.883586 144 N A 21 0.06000 0.06000 "ASN " "2HB " "    " 1 0 0 0 FFFFFF  H1877  1 <> 1 0 0 0 0 0 0 <> <> 0 1880 <> 0 0 1 <> <> <> <> <>
  1881 43 56.526962 60.068954 29.847215 144 N A 21 0.38000 0.38000 "ASN " "1HD2" "    " 1 0 0 0 FFFFFF  H1878  1 <> 1 0 0 0 0 0 0 <> <> 0 1881 <> 0 0 1 <> <> <> <> <>
  1882 43 58.137917 60.580883 29.415063 144 N A 21 0.38000 0.38000 "ASN " "2HD2" "    " 1 0 0 0 FFFFFF  H1879  1 <> 1 0 0 0 0 0 0 <> <> 0 1882 <> 0 0 1 <> <> <> <> <>
  1883 25 56.298798 61.318608 24.485342 145 K A 43 -0.50000 -0.50000 "LYS " " N  " "    " 7 0 0 0 5757FF  N1880  1 <> 1 0 0 0 0 0 0 <> <> 0 1883 <> 0 0 1 <> <> <> <> <>
  1884 3 55.114968 60.917141 23.748523 145 K A 2 0.14000 0.14000 "LYS " " CA " "    " 6 0 0 0 A0A0A0  C1881  1 <> 1 0 0 0 0 0 0 <> <> 0 1884 <> 0 0 1 <> <> <> <> <>
  1885 2 55.482646 60.359071 22.366252 145 K A 2 0.50000 0.50000 "LYS " " C  " "    " 6 0 0 0 A0A0A0  C1882  1 <> 1 0 0 0 0 0 0 <> <> 0 1885 <> 0 0 1 <> <> <> <> <>
  1886 15 54.740109 59.526568 21.862440 145 K A 70 -0.50000 -0.50000 "LYS " " O  " "    " 8 0 0 0 FF2F2F  O1883  1 <> 1 0 0 0 0 0 0 <> <> 0 1886 <> 0 0 1 <> <> <> <> <>
  1887 3 54.214220 62.151404 23.595284 145 K A 2 -0.12000 -0.12000 "LYS " " CB " "    " 6 0 0 0 A0A0A0  C1884  1 <> 1 0 0 0 0 0 0 <> <> 0 1887 <> 0 0 1 <> <> <> <> <>
  1888 3 53.549886 62.583666 24.918102 145 K A 2 -0.12000 -0.12000 "LYS " " CG " "    " 6 0 0 0 A0A0A0  C1885  1 <> 1 0 0 0 0 0 0 <> <> 0 1888 <> 0 0 1 <> <> <> <> <>
  1889 3 52.278817 61.770035 25.218183 145 K A 2 -0.12000 -0.12000 "LYS " " CD " "    " 6 0 0 0 A0A0A0  C1886  1 <> 1 0 0 0 0 0 0 <> <> 0 1889 <> 0 0 1 <> <> <> <> <>
  1890 3 51.904611 61.693824 26.705378 145 K A 2 0.19000 0.19000 "LYS " " CE " "    " 6 0 0 0 A0A0A0  C1887  1 <> 1 0 0 0 0 0 0 <> <> 0 1890 <> 0 0 1 <> <> <> <> <>
  1891 32 52.741162 60.711937 27.419670 145 K A 43 -0.30000 -0.30000 "LYS " " NZ " "    " 7 1 0 0 5757FF  N1888  1 <> 1 0 0 0 0 0 0 <> <> 0 1891 <> 0 0 1 <> <> <> <> <>
  1892 43 56.625830 62.276996 24.379710 145 K A 21 0.30000 0.30000 "LYS " " H  " "    " 1 0 0 0 FFFFFF  H1889  1 <> 1 0 0 0 0 0 0 <> <> 0 1892 <> 0 0 1 <> <> <> <> <>
  1893 41 54.574477 60.142363 24.293379 145 K A 21 0.06000 0.06000 "LYS " " HA " "    " 1 0 0 0 FFFFFF  H1890  1 <> 1 0 0 0 0 0 0 <> <> 0 1893 <> 0 0 1 <> <> <> <> <>
  1894 41 54.818403 62.962571 23.194282 145 K A 21 0.06000 0.06000 "LYS " "1HB " "    " 1 0 0 0 FFFFFF  H1891  1 <> 1 0 0 0 0 0 0 <> <> 0 1894 <> 0 0 1 <> <> <> <> <>
  1895 41 53.431983 61.958970 22.860405 145 K A 21 0.06000 0.06000 "LYS " "2HB " "    " 1 0 0 0 FFFFFF  H1892  1 <> 1 0 0 0 0 0 0 <> <> 0 1895 <> 0 0 1 <> <> <> <> <>
  1896 41 54.267626 62.510528 25.735469 145 K A 21 0.06000 0.06000 "LYS " "1HG " "    " 1 0 0 0 FFFFFF  H1893  1 <> 1 0 0 0 0 0 0 <> <> 0 1896 <> 0 0 1 <> <> <> <> <>
  1897 41 53.280051 63.639384 24.858642 145 K A 21 0.06000 0.06000 "LYS " "2HG " "    " 1 0 0 0 FFFFFF  H1894  1 <> 1 0 0 0 0 0 0 <> <> 0 1897 <> 0 0 1 <> <> <> <> <>
  1898 41 51.449007 62.207591 24.658889 145 K A 21 0.06000 0.06000 "LYS " "1HD " "    " 1 0 0 0 FFFFFF  H1895  1 <> 1 0 0 0 0 0 0 <> <> 0 1898 <> 0 0 1 <> <> <> <> <>
  1899 41 52.381630 60.757946 24.831510 145 K A 21 0.06000 0.06000 "LYS " "2HD " "    " 1 0 0 0 FFFFFF  H1896  1 <> 1 0 0 0 0 0 0 <> <> 0 1899 <> 0 0 1 <> <> <> <> <>
  1900 41 51.974405 62.673442 27.180291 145 K A 21 0.06000 0.06000 "LYS " "1HE " "    " 1 0 0 0 FFFFFF  H1897  1 <> 1 0 0 0 0 0 0 <> <> 0 1900 <> 0 0 1 <> <> <> <> <>
  1901 41 50.864755 61.373992 26.795178 145 K A 21 0.06000 0.06000 "LYS " "2HE " "    " 1 0 0 0 FFFFFF  H1898  1 <> 1 0 0 0 0 0 0 <> <> 0 1901 <> 0 0 1 <> <> <> <> <>
  1902 44 52.395415 60.572520 28.354193 145 K A 21 0.33000 0.33000 "LYS " "1HZ " "    " 1 0 0 0 FFFFFF  H1899  1 <> 1 0 0 0 0 0 0 <> <> 0 1902 <> 0 0 1 <> <> <> <> <>
  1903 44 52.684735 59.811539 26.928462 145 K A 21 0.33000 0.33000 "LYS " "2HZ " "    " 1 0 0 0 FFFFFF  H1900  1 <> 1 0 0 0 0 0 0 <> <> 0 1903 <> 0 0 1 <> <> <> <> <>
  1904 44 53.722763 60.986093 27.462686 145 K A 21 0.33000 0.33000 "LYS " "3HZ " "    " 1 0 0 0 FFFFFF  H1901  1 <> 1 0 0 0 0 0 0 <> <> 0 1904 <> 0 0 1 <> <> <> <> <>
  1905 25 56.635757 60.727467 21.784853 146 K A 43 -0.50000 -0.50000 "LYS " " N  " "    " 7 0 0 0 5757FF  N1902  1 <> 1 0 0 0 0 0 0 <> <> 0 1905 <> 0 0 1 <> <> <> <> <>
  1906 3 57.144359 60.137363 20.539060 146 K A 2 0.14000 0.14000 "LYS " " CA " "    " 6 0 0 0 A0A0A0  C1903  1 <> 1 0 0 0 0 0 0 <> <> 0 1906 <> 0 0 1 <> <> <> <> <>
  1907 2 57.602063 58.686516 20.777901 146 K A 2 0.50000 0.50000 "LYS " " C  " "    " 6 0 0 0 A0A0A0  C1904  1 <> 1 0 0 0 0 0 0 <> <> 0 1907 <> 0 0 1 <> <> <> <> <>
  1908 15 57.278593 57.805385 19.984322 146 K A 70 -0.50000 -0.50000 "LYS " " O  " "    " 8 0 0 0 FF2F2F  O1905  1 <> 1 0 0 0 0 0 0 <> <> 0 1908 <> 0 0 1 <> <> <> <> <>
  1909 3 58.344454 60.951515 20.016131 146 K A 2 -0.12000 -0.12000 "LYS " " CB " "    " 6 0 0 0 A0A0A0  C1906  1 <> 1 0 0 0 0 0 0 <> <> 0 1909 <> 0 0 1 <> <> <> <> <>
  1910 3 57.980997 62.282059 19.325750 146 K A 2 -0.12000 -0.12000 "LYS " " CG " "    " 6 0 0 0 A0A0A0  C1907  1 <> 1 0 0 0 0 0 0 <> <> 0 1910 <> 0 0 1 <> <> <> <> <>
  1911 3 59.086203 63.336043 19.509615 146 K A 2 -0.12000 -0.12000 "LYS " " CD " "    " 6 0 0 0 A0A0A0  C1908  1 <> 1 0 0 0 0 0 0 <> <> 0 1911 <> 0 0 1 <> <> <> <> <>
  1912 3 59.088305 64.506336 18.508946 146 K A 2 0.19000 0.19000 "LYS " " CE " "    " 6 0 0 0 A0A0A0  C1909  1 <> 1 0 0 0 0 0 0 <> <> 0 1912 <> 0 0 1 <> <> <> <> <>
  1913 32 60.038954 65.551109 18.929905 146 K A 43 -0.30000 -0.30000 "LYS " " NZ " "    " 7 1 0 0 5757FF  N1910  1 <> 1 0 0 0 0 0 0 <> <> 0 1913 <> 0 0 1 <> <> <> <> <>
  1914 43 57.230778 61.372319 22.282865 146 K A 21 0.30000 0.30000 "LYS " " H  " "    " 1 0 0 0 FFFFFF  H1911  1 <> 1 0 0 0 0 0 0 <> <> 0 1914 <> 0 0 1 <> <> <> <> <>
  1915 41 56.354186 60.127649 19.785252 146 K A 21 0.06000 0.06000 "LYS " " HA " "    " 1 0 0 0 FFFFFF  H1912  1 <> 1 0 0 0 0 0 0 <> <> 0 1915 <> 0 0 1 <> <> <> <> <>
  1916 41 59.041417 61.113707 20.834331 146 K A 21 0.06000 0.06000 "LYS " "1HB " "    " 1 0 0 0 FFFFFF  H1913  1 <> 1 0 0 0 0 0 0 <> <> 0 1916 <> 0 0 1 <> <> <> <> <>
  1917 41 58.905941 60.357500 19.290967 146 K A 21 0.06000 0.06000 "LYS " "2HB " "    " 1 0 0 0 FFFFFF  H1914  1 <> 1 0 0 0 0 0 0 <> <> 0 1917 <> 0 0 1 <> <> <> <> <>
  1918 41 57.812249 62.089672 18.264972 146 K A 21 0.06000 0.06000 "LYS " "1HG " "    " 1 0 0 0 FFFFFF  H1915  1 <> 1 0 0 0 0 0 0 <> <> 0 1918 <> 0 0 1 <> <> <> <> <>
  1919 41 57.041072 62.672521 19.711540 146 K A 21 0.06000 0.06000 "LYS " "2HG " "    " 1 0 0 0 FFFFFF  H1916  1 <> 1 0 0 0 0 0 0 <> <> 0 1919 <> 0 0 1 <> <> <> <> <>
  1920 41 59.012586 63.737009 20.519570 146 K A 21 0.06000 0.06000 "LYS " "1HD " "    " 1 0 0 0 FFFFFF  H1917  1 <> 1 0 0 0 0 0 0 <> <> 0 1920 <> 0 0 1 <> <> <> <> <>
  1921 41 60.054957 62.838726 19.444054 146 K A 21 0.06000 0.06000 "LYS " "2HD " "    " 1 0 0 0 FFFFFF  H1918  1 <> 1 0 0 0 0 0 0 <> <> 0 1921 <> 0 0 1 <> <> <> <> <>
  1922 41 59.356242 64.148509 17.514520 146 K A 21 0.06000 0.06000 "LYS " "1HE " "    " 1 0 0 0 FFFFFF  H1919  1 <> 1 0 0 0 0 0 0 <> <> 0 1922 <> 0 0 1 <> <> <> <> <>
  1923 41 58.100877 64.960425 18.434105 146 K A 21 0.06000 0.06000 "LYS " "2HE " "    " 1 0 0 0 FFFFFF  H1920  1 <> 1 0 0 0 0 0 0 <> <> 0 1923 <> 0 0 1 <> <> <> <> <>
  1924 44 60.278650 66.185271 18.189280 146 K A 21 0.33000 0.33000 "LYS " "1HZ " "    " 1 0 0 0 FFFFFF  H1921  1 <> 1 0 0 0 0 0 0 <> <> 0 1924 <> 0 0 1 <> <> <> <> <>
  1925 44 59.619848 66.083822 19.689669 146 K A 21 0.33000 0.33000 "LYS " "2HZ " "    " 1 0 0 0 FFFFFF  H1922  1 <> 1 0 0 0 0 0 0 <> <> 0 1925 <> 0 0 1 <> <> <> <> <>
  1926 44 60.902265 65.116701 19.321739 146 K A 21 0.33000 0.33000 "LYS " "3HZ " "    " 1 0 0 0 FFFFFF  H1923  1 <> 1 0 0 0 0 0 0 <> <> 0 1926 <> 0 0 1 <> <> <> <> <>
  1927 25 58.292665 58.423462 21.898533 147 L A 43 -0.50000 -0.50000 "LEU " " N  " "    " 7 0 0 0 5757FF  N1924  1 <> 1 0 0 0 0 0 0 <> <> 0 1927 <> 0 0 1 <> <> <> <> <>
  1928 3 58.706088 57.083574 22.324593 147 L A 2 0.14000 0.14000 "LEU " " CA " "    " 6 0 0 0 A0A0A0  C1925  1 <> 1 0 0 0 0 0 0 <> <> 0 1928 <> 0 0 1 <> <> <> <> <>
  1929 2 57.490442 56.205208 22.668693 147 L A 2 0.50000 0.50000 "LEU " " C  " "    " 6 0 0 0 A0A0A0  C1926  1 <> 1 0 0 0 0 0 0 <> <> 0 1929 <> 0 0 1 <> <> <> <> <>
  1930 15 57.479538 55.015097 22.352773 147 L A 70 -0.50000 -0.50000 "LEU " " O  " "    " 8 0 0 0 FF2F2F  O1927  1 <> 1 0 0 0 0 0 0 <> <> 0 1930 <> 0 0 1 <> <> <> <> <>
  1931 3 59.635317 57.193060 23.553295 147 L A 2 -0.12000 -0.12000 "LEU " " CB " "    " 6 0 0 0 A0A0A0  C1928  1 <> 1 0 0 0 0 0 0 <> <> 0 1931 <> 0 0 1 <> <> <> <> <>
  1932 3 61.031354 57.784584 23.251734 147 L A 2 -0.06000 -0.06000 "LEU " " CG " "    " 6 0 0 0 A0A0A0  C1929  1 <> 1 0 0 0 0 0 0 <> <> 0 1932 <> 0 0 1 <> <> <> <> <>
  1933 3 61.720611 58.240682 24.546811 147 L A 2 -0.18000 -0.18000 "LEU " " CD1" "    " 6 0 0 0 A0A0A0  C1930  1 <> 1 0 0 0 0 0 0 <> <> 0 1933 <> 0 0 1 <> <> <> <> <>
  1934 3 61.929536 56.796468 22.488746 147 L A 2 -0.18000 -0.18000 "LEU " " CD2" "    " 6 0 0 0 A0A0A0  C1931  1 <> 1 0 0 0 0 0 0 <> <> 0 1934 <> 0 0 1 <> <> <> <> <>
  1935 43 58.570984 59.203063 22.489523 147 L A 21 0.30000 0.30000 "LEU " " H  " "    " 1 0 0 0 FFFFFF  H1932  1 <> 1 0 0 0 0 0 0 <> <> 0 1935 <> 0 0 1 <> <> <> <> <>
  1936 41 59.235728 56.600160 21.503607 147 L A 21 0.06000 0.06000 "LEU " " HA " "    " 1 0 0 0 FFFFFF  H1933  1 <> 1 0 0 0 0 0 0 <> <> 0 1936 <> 0 0 1 <> <> <> <> <>
  1937 41 59.136949 57.798691 24.312768 147 L A 21 0.06000 0.06000 "LEU " "1HB " "    " 1 0 0 0 FFFFFF  H1934  1 <> 1 0 0 0 0 0 0 <> <> 0 1937 <> 0 0 1 <> <> <> <> <>
  1938 41 59.764689 56.208903 24.008432 147 L A 21 0.06000 0.06000 "LEU " "2HB " "    " 1 0 0 0 FFFFFF  H1935  1 <> 1 0 0 0 0 0 0 <> <> 0 1938 <> 0 0 1 <> <> <> <> <>
  1939 41 60.912714 58.669353 22.625445 147 L A 21 0.06000 0.06000 "LEU " " HG " "    " 1 0 0 0 FFFFFF  H1936  1 <> 1 0 0 0 0 0 0 <> <> 0 1939 <> 0 0 1 <> <> <> <> <>
  1940 41 62.690078 58.694490 24.337518 147 L A 21 0.06000 0.06000 "LEU " "1HD1" "    " 1 0 0 0 FFFFFF  H1937  1 <> 1 0 0 0 0 0 0 <> <> 0 1940 <> 0 0 1 <> <> <> <> <>
  1941 41 61.122051 58.985734 25.071710 147 L A 21 0.06000 0.06000 "LEU " "2HD1" "    " 1 0 0 0 FFFFFF  H1938  1 <> 1 0 0 0 0 0 0 <> <> 0 1941 <> 0 0 1 <> <> <> <> <>
  1942 41 61.885250 57.404498 25.227245 147 L A 21 0.06000 0.06000 "LEU " "3HD1" "    " 1 0 0 0 FFFFFF  H1939  1 <> 1 0 0 0 0 0 0 <> <> 0 1942 <> 0 0 1 <> <> <> <> <>
  1943 41 62.912980 57.228631 22.299562 147 L A 21 0.06000 0.06000 "LEU " "1HD2" "    " 1 0 0 0 FFFFFF  H1940  1 <> 1 0 0 0 0 0 0 <> <> 0 1943 <> 0 0 1 <> <> <> <> <>
  1944 41 62.079269 55.874823 23.052366 147 L A 21 0.06000 0.06000 "LEU " "2HD2" "    " 1 0 0 0 FFFFFF  H1941  1 <> 1 0 0 0 0 0 0 <> <> 0 1944 <> 0 0 1 <> <> <> <> <>
  1945 41 61.509662 56.529294 21.519427 147 L A 21 0.06000 0.06000 "LEU " "3HD2" "    " 1 0 0 0 FFFFFF  H1942  1 <> 1 0 0 0 0 0 0 <> <> 0 1945 <> 0 0 1 <> <> <> <> <>
  1946 25 56.441505 56.804351 23.252663 148 Q A 43 -0.50000 -0.50000 "GLN " " N  " "    " 7 0 0 0 5757FF  N1943  1 <> 1 0 0 0 0 0 0 <> <> 0 1946 <> 0 0 1 <> <> <> <> <>
  1947 3 55.152457 56.158133 23.479956 148 Q A 2 0.14000 0.14000 "GLN " " CA " "    " 6 0 0 0 A0A0A0  C1944  1 <> 1 0 0 0 0 0 0 <> <> 0 1947 <> 0 0 1 <> <> <> <> <>
  1948 2 54.459752 55.853182 22.138158 148 Q A 2 0.50000 0.50000 "GLN " " C  " "    " 6 0 0 0 A0A0A0  C1945  1 <> 1 0 0 0 0 0 0 <> <> 0 1948 <> 0 0 1 <> <> <> <> <>
  1949 15 54.056275 54.713628 21.928067 148 Q A 70 -0.50000 -0.50000 "GLN " " O  " "    " 8 0 0 0 FF2F2F  O1946  1 <> 1 0 0 0 0 0 0 <> <> 0 1949 <> 0 0 1 <> <> <> <> <>
  1950 3 54.283762 57.050215 24.382796 148 Q A 2 -0.12000 -0.12000 "GLN " " CB " "    " 6 0 0 0 A0A0A0  C1947  1 <> 1 0 0 0 0 0 0 <> <> 0 1950 <> 0 0 1 <> <> <> <> <>
  1951 3 52.963565 56.397705 24.841803 148 Q A 2 -0.12000 -0.12000 "GLN " " CG " "    " 6 0 0 0 A0A0A0  C1948  1 <> 1 0 0 0 0 0 0 <> <> 0 1951 <> 0 0 1 <> <> <> <> <>
  1952 2 52.164929 57.296036 25.781442 148 Q A 2 0.50000 0.50000 "GLN " " CD " "    " 6 0 0 0 A0A0A0  C1949  1 <> 1 0 0 0 0 0 0 <> <> 0 1952 <> 0 0 1 <> <> <> <> <>
  1953 15 52.587899 58.397394 26.134698 148 Q A 70 -0.50000 -0.50000 "GLN " " OE1" "    " 8 0 0 0 FF2F2F  O1950  1 <> 1 0 0 0 0 0 0 <> <> 0 1953 <> 0 0 1 <> <> <> <> <>
  1954 25 50.987707 56.860807 26.199277 148 Q A 43 -0.76000 -0.76000 "GLN " " NE2" "    " 7 0 0 0 5757FF  N1951  1 <> 1 0 0 0 0 0 0 <> <> 0 1954 <> 0 0 1 <> <> <> <> <>
  1955 43 56.545848 57.772398 23.522063 148 Q A 21 0.30000 0.30000 "GLN " " H  " "    " 1 0 0 0 FFFFFF  H1952  1 <> 1 0 0 0 0 0 0 <> <> 0 1955 <> 0 0 1 <> <> <> <> <>
  1956 41 55.331532 55.214090 23.998397 148 Q A 21 0.06000 0.06000 "GLN " " HA " "    " 1 0 0 0 FFFFFF  H1953  1 <> 1 0 0 0 0 0 0 <> <> 0 1956 <> 0 0 1 <> <> <> <> <>
  1957 41 54.864647 57.322973 25.265107 148 Q A 21 0.06000 0.06000 "GLN " "1HB " "    " 1 0 0 0 FFFFFF  H1954  1 <> 1 0 0 0 0 0 0 <> <> 0 1957 <> 0 0 1 <> <> <> <> <>
  1958 41 54.058151 57.979476 23.865192 148 Q A 21 0.06000 0.06000 "GLN " "2HB " "    " 1 0 0 0 FFFFFF  H1955  1 <> 1 0 0 0 0 0 0 <> <> 0 1958 <> 0 0 1 <> <> <> <> <>
  1959 41 52.335747 56.169700 23.980320 148 Q A 21 0.06000 0.06000 "GLN " "1HG " "    " 1 0 0 0 FFFFFF  H1956  1 <> 1 0 0 0 0 0 0 <> <> 0 1959 <> 0 0 1 <> <> <> <> <>
  1960 41 53.167581 55.451431 25.344534 148 Q A 21 0.06000 0.06000 "GLN " "2HG " "    " 1 0 0 0 FFFFFF  H1957  1 <> 1 0 0 0 0 0 0 <> <> 0 1960 <> 0 0 1 <> <> <> <> <>
  1961 43 50.389667 57.506694 26.710662 148 Q A 21 0.38000 0.38000 "GLN " "1HE2" "    " 1 0 0 0 FFFFFF  H1958  1 <> 1 0 0 0 0 0 0 <> <> 0 1961 <> 0 0 1 <> <> <> <> <>
  1962 43 50.611116 55.946762 25.930937 148 Q A 21 0.38000 0.38000 "GLN " "2HE2" "    " 1 0 0 0 FFFFFF  H1959  1 <> 1 0 0 0 0 0 0 <> <> 0 1962 <> 0 0 1 <> <> <> <> <>
  1963 25 54.405120 56.817005 21.199535 149 M A 43 -0.50000 -0.50000 "MET " " N  " "    " 7 0 0 0 5757FF  N1960  1 <> 1 0 0 0 0 0 0 <> <> 0 1963 <> 0 0 1 <> <> <> <> <>
  1964 3 53.887960 56.652280 19.830533 149 M A 2 0.14000 0.14000 "MET " " CA " "    " 6 0 0 0 A0A0A0  C1961  1 <> 1 0 0 0 0 0 0 <> <> 0 1964 <> 0 0 1 <> <> <> <> <>
  1965 2 54.559200 55.469588 19.111999 149 M A 2 0.50000 0.50000 "MET " " C  " "    " 6 0 0 0 A0A0A0  C1962  1 <> 1 0 0 0 0 0 0 <> <> 0 1965 <> 0 0 1 <> <> <> <> <>
  1966 15 53.885323 54.642040 18.509511 149 M A 70 -0.50000 -0.50000 "MET " " O  " "    " 8 0 0 0 FF2F2F  O1963  1 <> 1 0 0 0 0 0 0 <> <> 0 1966 <> 0 0 1 <> <> <> <> <>
  1967 3 54.058004 57.949776 19.008276 149 M A 2 -0.12000 -0.12000 "MET " " CB " "    " 6 0 0 0 A0A0A0  C1964  1 <> 1 0 0 0 0 0 0 <> <> 0 1967 <> 0 0 1 <> <> <> <> <>
  1968 3 52.988349 58.140954 17.922257 149 M A 2 0.04750 0.04750 "MET " " CG " "    " 6 0 0 0 A0A0A0  C1965  1 <> 1 0 0 0 0 0 0 <> <> 0 1968 <> 0 0 1 <> <> <> <> <>
  1969 49 51.483341 58.941854 18.542602 149 M A 13 -0.33500 -0.33500 "MET " " SD " "    " 16 0 0 0 E1E11E  S1966  1 <> 1 0 0 0 0 0 0 <> <> 0 1969 <> 0 0 1 <> <> <> <> <>
  1970 3 51.149544 60.114999 17.198968 149 M A 2 -0.01250 -0.01250 "MET " " CE " "    " 6 0 0 0 A0A0A0  C1967  1 <> 1 0 0 0 0 0 0 <> <> 0 1970 <> 0 0 1 <> <> <> <> <>
  1971 43 54.716017 57.749786 21.457487 149 M A 21 0.30000 0.30000 "MET " " H  " "    " 1 0 0 0 FFFFFF  H1968  1 <> 1 0 0 0 0 0 0 <> <> 0 1971 <> 0 0 1 <> <> <> <> <>
  1972 41 52.823214 56.450165 19.918382 149 M A 21 0.06000 0.06000 "MET " " HA " "    " 1 0 0 0 FFFFFF  H1969  1 <> 1 0 0 0 0 0 0 <> <> 0 1972 <> 0 0 1 <> <> <> <> <>
  1973 41 54.032890 58.829899 19.644287 149 M A 21 0.06000 0.06000 "MET " "1HB " "    " 1 0 0 0 FFFFFF  H1970  1 <> 1 0 0 0 0 0 0 <> <> 0 1973 <> 0 0 1 <> <> <> <> <>
  1974 41 55.042527 57.958001 18.541372 149 M A 21 0.06000 0.06000 "MET " "2HB " "    " 1 0 0 0 FFFFFF  H1971  1 <> 1 0 0 0 0 0 0 <> <> 0 1974 <> 0 0 1 <> <> <> <> <>
  1975 41 53.393964 58.764260 17.127206 149 M A 21 0.06000 0.06000 "MET " "1HG " "    " 1 0 0 0 FFFFFF  H1972  1 <> 1 0 0 0 0 0 0 <> <> 0 1975 <> 0 0 1 <> <> <> <> <>
  1976 41 52.726247 57.194494 17.446759 149 M A 21 0.06000 0.06000 "MET " "2HG " "    " 1 0 0 0 FFFFFF  H1973  1 <> 1 0 0 0 0 0 0 <> <> 0 1976 <> 0 0 1 <> <> <> <> <>
  1977 41 50.113793 60.451994 17.240107 149 M A 21 0.06000 0.06000 "MET " "1HE " "    " 1 0 0 0 FFFFFF  H1974  1 <> 1 0 0 0 0 0 0 <> <> 0 1977 <> 0 0 1 <> <> <> <> <>
  1978 41 51.805422 60.981923 17.275019 149 M A 21 0.06000 0.06000 "MET " "2HE " "    " 1 0 0 0 FFFFFF  H1975  1 <> 1 0 0 0 0 0 0 <> <> 0 1978 <> 0 0 1 <> <> <> <> <>
  1979 41 51.311588 59.658971 16.225515 149 M A 21 0.06000 0.06000 "MET " "3HE " "    " 1 0 0 0 FFFFFF  H1976  1 <> 1 0 0 0 0 0 0 <> <> 0 1979 <> 0 0 1 <> <> <> <> <>
  1980 25 55.882979 55.352585 19.269567 150 K A 43 -0.50000 -0.50000 "LYS " " N  " "    " 7 0 0 0 5757FF  N1977  1 <> 1 0 0 0 0 0 0 <> <> 0 1980 <> 0 0 1 <> <> <> <> <>
  1981 3 56.722075 54.277564 18.755669 150 K A 2 0.14000 0.14000 "LYS " " CA " "    " 6 0 0 0 A0A0A0  C1978  1 <> 1 0 0 0 0 0 0 <> <> 0 1981 <> 0 0 1 <> <> <> <> <>
  1982 2 56.573635 52.919799 19.473348 150 K A 2 0.50000 0.50000 "LYS " " C  " "    " 6 0 0 0 A0A0A0  C1979  1 <> 1 0 0 0 0 0 0 <> <> 0 1982 <> 0 0 1 <> <> <> <> <>
  1983 15 57.251657 51.976580 19.067313 150 K A 70 -0.50000 -0.50000 "LYS " " O  " "    " 8 0 0 0 FF2F2F  O1980  1 <> 1 0 0 0 0 0 0 <> <> 0 1983 <> 0 0 1 <> <> <> <> <>
  1984 3 58.202542 54.740602 18.811633 150 K A 2 -0.12000 -0.12000 "LYS " " CB " "    " 6 0 0 0 A0A0A0  C1981  1 <> 1 0 0 0 0 0 0 <> <> 0 1984 <> 0 0 1 <> <> <> <> <>
  1985 3 58.658822 55.475489 17.536900 150 K A 2 -0.12000 -0.12000 "LYS " " CG " "    " 6 0 0 0 A0A0A0  C1982  1 <> 1 0 0 0 0 0 0 <> <> 0 1985 <> 0 0 1 <> <> <> <> <>
  1986 3 59.353937 54.573978 16.495691 150 K A 2 -0.12000 -0.12000 "LYS " " CD " "    " 6 0 0 0 A0A0A0  C1983  1 <> 1 0 0 0 0 0 0 <> <> 0 1986 <> 0 0 1 <> <> <> <> <>
  1987 3 58.524769 53.349047 16.066440 150 K A 2 0.19000 0.19000 "LYS " " CE " "    " 6 0 0 0 A0A0A0  C1984  1 <> 1 0 0 0 0 0 0 <> <> 0 1987 <> 0 0 1 <> <> <> <> <>
  1988 32 59.060228 52.702376 14.859790 150 K A 43 -0.30000 -0.30000 "LYS " " NZ " "    " 7 1 0 0 5757FF  N1985  1 <> 1 0 0 0 0 0 0 <> <> 0 1988 <> 0 0 1 <> <> <> <> <>
  1989 43 56.347373 56.103191 19.772484 150 K A 21 0.30000 0.30000 "LYS " " H  " "    " 1 0 0 0 FFFFFF  H1986  1 <> 1 0 0 0 0 0 0 <> <> 0 1989 <> 0 0 1 <> <> <> <> <>
  1990 41 56.416502 54.095765 17.726287 150 K A 21 0.06000 0.06000 "LYS " " HA " "    " 1 0 0 0 FFFFFF  H1987  1 <> 1 0 0 0 0 0 0 <> <> 0 1990 <> 0 0 1 <> <> <> <> <>
  1991 41 58.340722 55.392774 19.673243 150 K A 21 0.06000 0.06000 "LYS " "1HB " "    " 1 0 0 0 FFFFFF  H1988  1 <> 1 0 0 0 0 0 0 <> <> 0 1991 <> 0 0 1 <> <> <> <> <>
  1992 41 58.888256 53.912992 19.001840 150 K A 21 0.06000 0.06000 "LYS " "2HB " "    " 1 0 0 0 FFFFFF  H1989  1 <> 1 0 0 0 0 0 0 <> <> 0 1992 <> 0 0 1 <> <> <> <> <>
  1993 41 57.817540 56.004563 17.086036 150 K A 21 0.06000 0.06000 "LYS " "1HG " "    " 1 0 0 0 FFFFFF  H1990  1 <> 1 0 0 0 0 0 0 <> <> 0 1993 <> 0 0 1 <> <> <> <> <>
  1994 41 59.360322 56.261236 17.822681 150 K A 21 0.06000 0.06000 "LYS " "2HG " "    " 1 0 0 0 FFFFFF  H1991  1 <> 1 0 0 0 0 0 0 <> <> 0 1994 <> 0 0 1 <> <> <> <> <>
  1995 41 59.579673 55.194169 15.626240 150 K A 21 0.06000 0.06000 "LYS " "1HD " "    " 1 0 0 0 FFFFFF  H1992  1 <> 1 0 0 0 0 0 0 <> <> 0 1995 <> 0 0 1 <> <> <> <> <>
  1996 41 60.316804 54.244503 16.889302 150 K A 21 0.06000 0.06000 "LYS " "2HD " "    " 1 0 0 0 FFFFFF  H1993  1 <> 1 0 0 0 0 0 0 <> <> 0 1996 <> 0 0 1 <> <> <> <> <>
  1997 41 58.471309 52.611464 16.867019 150 K A 21 0.06000 0.06000 "LYS " "1HE " "    " 1 0 0 0 FFFFFF  H1994  1 <> 1 0 0 0 0 0 0 <> <> 0 1997 <> 0 0 1 <> <> <> <> <>
  1998 41 57.504079 53.654537 15.842942 150 K A 21 0.06000 0.06000 "LYS " "2HE " "    " 1 0 0 0 FFFFFF  H1995  1 <> 1 0 0 0 0 0 0 <> <> 0 1998 <> 0 0 1 <> <> <> <> <>
  1999 44 58.408781 51.969348 14.583442 150 K A 21 0.33000 0.33000 "LYS " "1HZ " "    " 1 0 0 0 FFFFFF  H1996  1 <> 1 0 0 0 0 0 0 <> <> 0 1999 <> 0 0 1 <> <> <> <> <>
  2000 44 59.050996 53.400373 14.113562 150 K A 21 0.33000 0.33000 "LYS " "2HZ " "    " 1 0 0 0 FFFFFF  H1997  1 <> 1 0 0 0 0 0 0 <> <> 0 2000 <> 0 0 1 <> <> <> <> <>
  2001 44 59.986177 52.329238 14.990367 150 K A 21 0.33000 0.33000 "LYS " "3HZ " "    " 1 0 0 0 FFFFFF  H1998  1 <> 1 0 0 0 0 0 0 <> <> 0 2001 <> 0 0 1 <> <> <> <> <>
  2002 25 55.694914 52.783385 20.474197 151 S A 43 -0.50000 -0.50000 "SER " " N  " "    " 7 0 0 0 5757FF  N1999  1 <> 1 0 0 0 0 0 0 <> <> 0 2002 <> 0 0 1 <> <> <> <> <>
  2003 3 55.477391 51.544569 21.224998 151 S A 2 0.14000 0.14000 "SER " " CA " "    " 6 0 0 0 A0A0A0  C2000  1 <> 1 0 0 0 0 0 0 <> <> 0 2003 <> 0 0 1 <> <> <> <> <>
  2004 2 53.996383 51.148981 21.376945 151 S A 2 0.50000 0.50000 "SER " " C  " "    " 6 0 0 0 A0A0A0  C2001  1 <> 1 0 0 0 0 0 0 <> <> 0 2004 <> 0 0 1 <> <> <> <> <>
  2005 15 53.699898 49.961905 21.499477 151 S A 70 -0.50000 -0.50000 "SER " " O  " "    " 8 0 0 0 FF2F2F  O2002  1 <> 1 0 0 0 0 0 0 <> <> 0 2005 <> 0 0 1 <> <> <> <> <>
  2006 3 56.320517 51.552420 22.516731 151 S A 2 0.14500 0.14500 "SER " " CB " "    " 6 0 0 0 A0A0A0  C2003  1 <> 1 0 0 0 0 0 0 <> <> 0 2006 <> 0 0 1 <> <> <> <> <>
  2007 16 56.096968 52.714611 23.298756 151 S A 70 -0.68300 -0.68300 "SER " " OG " "    " 8 0 0 0 FF2F2F  O2004  1 <> 1 0 0 0 0 0 0 <> <> 0 2007 <> 0 0 1 <> <> <> <> <>
  2008 43 55.179719 53.600412 20.783233 151 S A 21 0.30000 0.30000 "SER " " H  " "    " 1 0 0 0 FFFFFF  H2005  1 <> 1 0 0 0 0 0 0 <> <> 0 2008 <> 0 0 1 <> <> <> <> <>
  2009 41 55.871004 50.714007 20.635162 151 S A 21 0.06000 0.06000 "SER " " HA " "    " 1 0 0 0 FFFFFF  H2006  1 <> 1 0 0 0 0 0 0 <> <> 0 2009 <> 0 0 1 <> <> <> <> <>
  2010 41 56.085347 50.672157 23.117446 151 S A 21 0.06000 0.06000 "SER " "1HB " "    " 1 0 0 0 FFFFFF  H2007  1 <> 1 0 0 0 0 0 0 <> <> 0 2010 <> 0 0 1 <> <> <> <> <>
  2011 41 57.382519 51.489590 22.275511 151 S A 21 0.06000 0.06000 "SER " "2HB " "    " 1 0 0 0 FFFFFF  H2008  1 <> 1 0 0 0 0 0 0 <> <> 0 2011 <> 0 0 1 <> <> <> <> <>
  2012 42 56.528641 53.449528 22.864920 151 S A 21 0.41800 0.41800 "SER " " HG " "    " 1 0 0 0 FFFFFF  H2009  1 <> 1 0 0 0 0 0 0 <> <> 0 2012 <> 0 0 1 <> <> <> <> <>
  2013 25 53.050961 52.094973 21.282429 152 I A 43 -0.50000 -0.50000 "ILE " " N  " "    " 7 0 0 0 5757FF  N2010  1 <> 1 0 0 0 0 0 0 <> <> 0 2013 <> 0 0 1 <> <> <> <> <>
  2014 3 51.606004 51.822079 21.308935 152 I A 2 0.14000 0.14000 "ILE " " CA " "    " 6 0 0 0 A0A0A0  C2011  1 <> 1 0 0 0 0 0 0 <> <> 0 2014 <> 0 0 1 <> <> <> <> <>
  2015 2 51.079280 51.269549 19.963150 152 I A 2 0.50000 0.50000 "ILE " " C  " "    " 6 0 0 0 A0A0A0  C2012  1 <> 1 0 0 0 0 0 0 <> <> 0 2015 <> 0 0 1 <> <> <> <> <>
  2016 15 49.975021 50.731730 19.934167 152 I A 70 -0.50000 -0.50000 "ILE " " O  " "    " 8 0 0 0 FF2F2F  O2013  1 <> 1 0 0 0 0 0 0 <> <> 0 2016 <> 0 0 1 <> <> <> <> <>
  2017 3 50.843135 53.123237 21.685267 152 I A 2 -0.06000 -0.06000 "ILE " " CB " "    " 6 0 0 0 A0A0A0  C2014  1 <> 1 0 0 0 0 0 0 <> <> 0 2017 <> 0 0 1 <> <> <> <> <>
  2018 3 51.152744 53.518131 23.145348 152 I A 2 -0.18000 -0.18000 "ILE " " CG2" "    " 6 0 0 0 A0A0A0  C2015  1 <> 1 0 0 0 0 0 0 <> <> 0 2018 <> 0 0 1 <> <> <> <> <>
  2019 3 51.062595 54.275463 20.670197 152 I A 2 -0.12000 -0.12000 "ILE " " CG1" "    " 6 0 0 0 A0A0A0  C2016  1 <> 1 0 0 0 0 0 0 <> <> 0 2019 <> 0 0 1 <> <> <> <> <>
  2020 3 50.489961 55.632718 21.089216 152 I A 2 -0.18000 -0.18000 "ILE " " CD1" "    " 6 0 0 0 A0A0A0  C2017  1 <> 1 0 0 0 0 0 0 <> <> 0 2020 <> 0 0 1 <> <> <> <> <>
  2021 43 53.341441 53.067697 21.306618 152 I A 21 0.30000 0.30000 "ILE " " H  " "    " 1 0 0 0 FFFFFF  H2018  1 <> 1 0 0 0 0 0 0 <> <> 0 2021 <> 0 0 1 <> <> <> <> <>
  2022 41 51.399520 51.072406 22.073012 152 I A 21 0.06000 0.06000 "ILE " " HA " "    " 1 0 0 0 FFFFFF  H2019  1 <> 1 0 0 0 0 0 0 <> <> 0 2022 <> 0 0 1 <> <> <> <> <>
  2023 41 49.775690 52.890686 21.664909 152 I A 21 0.06000 0.06000 "ILE " " HB " "    " 1 0 0 0 FFFFFF  H2020  1 <> 1 0 0 0 0 0 0 <> <> 0 2023 <> 0 0 1 <> <> <> <> <>
  2024 41 50.596010 54.399087 23.458487 152 I A 21 0.06000 0.06000 "ILE " "1HG2" "    " 1 0 0 0 FFFFFF  H2021  1 <> 1 0 0 0 0 0 0 <> <> 0 2024 <> 0 0 1 <> <> <> <> <>
  2025 41 50.873170 52.714478 23.827504 152 I A 21 0.06000 0.06000 "ILE " "2HG2" "    " 1 0 0 0 FFFFFF  H2022  1 <> 1 0 0 0 0 0 0 <> <> 0 2025 <> 0 0 1 <> <> <> <> <>
  2026 41 52.209015 53.720563 23.307212 152 I A 21 0.06000 0.06000 "ILE " "3HG2" "    " 1 0 0 0 FFFFFF  H2023  1 <> 1 0 0 0 0 0 0 <> <> 0 2026 <> 0 0 1 <> <> <> <> <>
  2027 41 52.117372 54.394002 20.456403 152 I A 21 0.06000 0.06000 "ILE " "1HG1" "    " 1 0 0 0 FFFFFF  H2024  1 <> 1 0 0 0 0 0 0 <> <> 0 2027 <> 0 0 1 <> <> <> <> <>
  2028 41 50.629508 54.008306 19.708296 152 I A 21 0.06000 0.06000 "ILE " "2HG1" "    " 1 0 0 0 FFFFFF  H2025  1 <> 1 0 0 0 0 0 0 <> <> 0 2028 <> 0 0 1 <> <> <> <> <>
  2029 41 50.469915 56.318082 20.241709 152 I A 21 0.06000 0.06000 "ILE " "1HD1" "    " 1 0 0 0 FFFFFF  H2026  1 <> 1 0 0 0 0 0 0 <> <> 0 2029 <> 0 0 1 <> <> <> <> <>
  2030 41 49.475168 55.543403 21.468360 152 I A 21 0.06000 0.06000 "ILE " "2HD1" "    " 1 0 0 0 FFFFFF  H2027  1 <> 1 0 0 0 0 0 0 <> <> 0 2030 <> 0 0 1 <> <> <> <> <>
  2031 41 51.102165 56.090374 21.864695 152 I A 21 0.06000 0.06000 "ILE " "3HD1" "    " 1 0 0 0 FFFFFF  H2028  1 <> 1 0 0 0 0 0 0 <> <> 0 2031 <> 0 0 1 <> <> <> <> <>
  2032 25 51.877278 51.391623 18.885946 153 V A 43 -0.50000 -0.50000 "VAL " " N  " "    " 7 0 0 0 5757FF  N2029  1 <> 1 0 0 0 0 0 0 <> <> 0 2032 <> 0 0 1 <> <> <> <> <>
  2033 3 51.628232 51.136129 17.457144 153 V A 2 0.14000 0.14000 "VAL " " CA " "    " 6 0 0 0 A0A0A0  C2030  1 <> 1 0 0 0 0 0 0 <> <> 0 2033 <> 0 0 1 <> <> <> <> <>
  2034 2 50.516018 50.116560 17.136116 153 V A 2 0.50000 0.50000 "VAL " " C  " "    " 6 0 0 0 A0A0A0  C2031  1 <> 1 0 0 0 0 0 0 <> <> 0 2034 <> 0 0 1 <> <> <> <> <>
  2035 15 49.540462 50.439284 16.463724 153 V A 70 -0.50000 -0.50000 "VAL " " O  " "    " 8 0 0 0 FF2F2F  O2032  1 <> 1 0 0 0 0 0 0 <> <> 0 2035 <> 0 0 1 <> <> <> <> <>
  2036 3 52.975085 50.853629 16.726543 153 V A 2 -0.06000 -0.06000 "VAL " " CB " "    " 6 0 0 0 A0A0A0  C2033  1 <> 1 0 0 0 0 0 0 <> <> 0 2036 <> 0 0 1 <> <> <> <> <>
  2037 3 52.812193 50.713677 15.207109 153 V A 2 -0.18000 -0.18000 "VAL " " CG1" "    " 6 0 0 0 A0A0A0  C2034  1 <> 1 0 0 0 0 0 0 <> <> 0 2037 <> 0 0 1 <> <> <> <> <>
  2038 3 54.058070 51.907411 17.005971 153 V A 2 -0.18000 -0.18000 "VAL " " CG2" "    " 6 0 0 0 A0A0A0  C2035  1 <> 1 0 0 0 0 0 0 <> <> 0 2038 <> 0 0 1 <> <> <> <> <>
  2039 43 52.748747 51.858432 19.084890 153 V A 21 0.30000 0.30000 "VAL " " H  " "    " 1 0 0 0 FFFFFF  H2036  1 <> 1 0 0 0 0 0 0 <> <> 0 2039 <> 0 0 1 <> <> <> <> <>
  2040 41 51.254026 52.088067 17.074970 153 V A 21 0.06000 0.06000 "VAL " " HA " "    " 1 0 0 0 FFFFFF  H2037  1 <> 1 0 0 0 0 0 0 <> <> 0 2040 <> 0 0 1 <> <> <> <> <>
  2041 41 53.357200 49.901062 17.097690 153 V A 21 0.06000 0.06000 "VAL " " HB " "    " 1 0 0 0 FFFFFF  H2038  1 <> 1 0 0 0 0 0 0 <> <> 0 2041 <> 0 0 1 <> <> <> <> <>
  2042 41 53.769742 50.526850 14.720327 153 V A 21 0.06000 0.06000 "VAL " "1HG1" "    " 1 0 0 0 FFFFFF  H2039  1 <> 1 0 0 0 0 0 0 <> <> 0 2042 <> 0 0 1 <> <> <> <> <>
  2043 41 52.150630 49.888768 14.949436 153 V A 21 0.06000 0.06000 "VAL " "2HG1" "    " 1 0 0 0 FFFFFF  H2040  1 <> 1 0 0 0 0 0 0 <> <> 0 2043 <> 0 0 1 <> <> <> <> <>
  2044 41 52.388157 51.619756 14.777817 153 V A 21 0.06000 0.06000 "VAL " "3HG1" "    " 1 0 0 0 FFFFFF  H2041  1 <> 1 0 0 0 0 0 0 <> <> 0 2044 <> 0 0 1 <> <> <> <> <>
  2045 41 54.991262 51.662137 16.498293 153 V A 21 0.06000 0.06000 "VAL " "1HG2" "    " 1 0 0 0 FFFFFF  H2042  1 <> 1 0 0 0 0 0 0 <> <> 0 2045 <> 0 0 1 <> <> <> <> <>
  2046 41 53.742001 52.889724 16.656172 153 V A 21 0.06000 0.06000 "VAL " "2HG2" "    " 1 0 0 0 FFFFFF  H2043  1 <> 1 0 0 0 0 0 0 <> <> 0 2046 <> 0 0 1 <> <> <> <> <>
  2047 41 54.286736 51.982338 18.066565 153 V A 21 0.06000 0.06000 "VAL " "3HG2" "    " 1 0 0 0 FFFFFF  H2044  1 <> 1 0 0 0 0 0 0 <> <> 0 2047 <> 0 0 1 <> <> <> <> <>
  2048 25 50.669644 48.893678 17.647859 154 K A 43 -0.50000 -0.50000 "LYS " " N  " "    " 7 0 0 0 5757FF  N2045  1 <> 1 0 0 0 0 0 0 <> <> 0 2048 <> 0 0 1 <> <> <> <> <>
  2049 3 49.635921 47.873434 17.710610 154 K A 2 0.14000 0.14000 "LYS " " CA " "    " 6 0 0 0 A0A0A0  C2046  1 <> 1 0 0 0 0 0 0 <> <> 0 2049 <> 0 0 1 <> <> <> <> <>
  2050 2 49.895378 47.057753 18.978196 154 K A 2 0.50000 0.50000 "LYS " " C  " "    " 6 0 0 0 A0A0A0  C2047  1 <> 1 0 0 0 0 0 0 <> <> 0 2050 <> 0 0 1 <> <> <> <> <>
  2051 15 50.184887 45.867657 18.914329 154 K A 70 -0.50000 -0.50000 "LYS " " O  " "    " 8 0 0 0 FF2F2F  O2048  1 <> 1 0 0 0 0 0 0 <> <> 0 2051 <> 0 0 1 <> <> <> <> <>
  2052 3 49.509277 47.078867 16.381820 154 K A 2 -0.12000 -0.12000 "LYS " " CB " "    " 6 0 0 0 A0A0A0  C2049  1 <> 1 0 0 0 0 0 0 <> <> 0 2052 <> 0 0 1 <> <> <> <> <>
  2053 3 48.354088 46.046715 16.324630 154 K A 2 -0.12000 -0.12000 "LYS " " CG " "    " 6 0 0 0 A0A0A0  C2050  1 <> 1 0 0 0 0 0 0 <> <> 0 2053 <> 0 0 1 <> <> <> <> <>
  2054 3 46.952081 46.677311 16.365677 154 K A 2 -0.12000 -0.12000 "LYS " " CD " "    " 6 0 0 0 A0A0A0  C2051  1 <> 1 0 0 0 0 0 0 <> <> 0 2054 <> 0 0 1 <> <> <> <> <>
  2055 3 45.803989 45.661145 16.513396 154 K A 2 0.19000 0.19000 "LYS " " CE " "    " 6 0 0 0 A0A0A0  C2052  1 <> 1 0 0 0 0 0 0 <> <> 0 2055 <> 0 0 1 <> <> <> <> <>
  2056 32 44.508239 46.349316 16.483536 154 K A 43 -0.30000 -0.30000 "LYS " " NZ " "    " 7 1 0 0 5757FF  N2053  1 <> 1 0 0 0 0 0 0 <> <> 0 2056 <> 0 0 1 <> <> <> <> <>
  2057 43 51.482257 48.737197 18.225422 154 K A 21 0.30000 0.30000 "LYS " " H  " "    " 1 0 0 0 FFFFFF  H2054  1 <> 1 0 0 0 0 0 0 <> <> 0 2057 <> 0 0 1 <> <> <> <> <>
  2058 41 48.694373 48.396737 17.884010 154 K A 21 0.06000 0.06000 "LYS " " HA " "    " 1 0 0 0 FFFFFF  H2055  1 <> 1 0 0 0 0 0 0 <> <> 0 2058 <> 0 0 1 <> <> <> <> <>
  2059 41 49.390960 47.777698 15.552612 154 K A 21 0.06000 0.06000 "LYS " "1HB " "    " 1 0 0 0 FFFFFF  H2056  1 <> 1 0 0 0 0 0 0 <> <> 0 2059 <> 0 0 1 <> <> <> <> <>
  2060 41 50.449331 46.556948 16.197144 154 K A 21 0.06000 0.06000 "LYS " "2HB " "    " 1 0 0 0 FFFFFF  H2057  1 <> 1 0 0 0 0 0 0 <> <> 0 2060 <> 0 0 1 <> <> <> <> <>
  2061 41 48.448182 45.468470 15.404293 154 K A 21 0.06000 0.06000 "LYS " "1HG " "    " 1 0 0 0 FFFFFF  H2058  1 <> 1 0 0 0 0 0 0 <> <> 0 2061 <> 0 0 1 <> <> <> <> <>
  2062 41 48.456384 45.320986 17.131506 154 K A 21 0.06000 0.06000 "LYS " "2HG " "    " 1 0 0 0 FFFFFF  H2059  1 <> 1 0 0 0 0 0 0 <> <> 0 2062 <> 0 0 1 <> <> <> <> <>
  2063 41 46.896835 47.365998 17.205442 154 K A 21 0.06000 0.06000 "LYS " "1HD " "    " 1 0 0 0 FFFFFF  H2060  1 <> 1 0 0 0 0 0 0 <> <> 0 2063 <> 0 0 1 <> <> <> <> <>
  2064 41 46.801446 47.278812 15.466461 154 K A 21 0.06000 0.06000 "LYS " "2HD " "    " 1 0 0 0 FFFFFF  H2061  1 <> 1 0 0 0 0 0 0 <> <> 0 2064 <> 0 0 1 <> <> <> <> <>
  2065 41 45.826615 44.925924 15.707590 154 K A 21 0.06000 0.06000 "LYS " "1HE " "    " 1 0 0 0 FFFFFF  H2062  1 <> 1 0 0 0 0 0 0 <> <> 0 2065 <> 0 0 1 <> <> <> <> <>
  2066 41 45.896003 45.120035 17.455805 154 K A 21 0.06000 0.06000 "LYS " "2HE " "    " 1 0 0 0 FFFFFF  H2063  1 <> 1 0 0 0 0 0 0 <> <> 0 2066 <> 0 0 1 <> <> <> <> <>
  2067 44 44.335490 46.664532 15.504097 154 K A 21 0.33000 0.33000 "LYS " "1HZ " "    " 1 0 0 0 FFFFFF  H2064  1 <> 1 0 0 0 0 0 0 <> <> 0 2067 <> 0 0 1 <> <> <> <> <>
  2068 44 43.703221 45.793849 16.753206 154 K A 21 0.33000 0.33000 "LYS " "2HZ " "    " 1 0 0 0 FFFFFF  H2065  1 <> 1 0 0 0 0 0 0 <> <> 0 2068 <> 0 0 1 <> <> <> <> <>
  2069 44 44.533682 47.210940 17.024622 154 K A 21 0.33000 0.33000 "LYS " "3HZ " "    " 1 0 0 0 FFFFFF  H2066  1 <> 1 0 0 0 0 0 0 <> <> 0 2069 <> 0 0 1 <> <> <> <> <>
  2070 25 49.830418 47.714365 20.143118 155 N A 43 -0.50000 -0.50000 "ASN " " N  " "    " 7 0 0 0 5757FF  N2067  0 <> 1 0 0 0 0 0 0 <> <> 0 2070 <> 0 0 1 <> <> <> <> <>
  2071 3 50.052604 47.091842 21.458773 155 N A 2 0.14000 0.14000 "ASN " " CA " "    " 6 0 0 0 A0A0A0  C2068  0 <> 1 0 0 0 0 0 0 <> <> 0 2071 <> 0 0 1 <> <> <> <> <>
  2072 2 48.865526 46.220610 21.925110 155 N A 2 0.50000 0.50000 "ASN " " C  " "    " 6 0 0 0 A0A0A0  C2069  0 <> 1 0 0 0 0 0 0 <> <> 0 2072 <> 0 0 1 <> <> <> <> <>
  2073 15 48.942304 45.586342 22.972625 155 N A 70 -0.50000 -0.50000 "ASN " " O  " "    " 8 0 0 0 FF2F2F  O2070  0 <> 1 0 0 0 0 0 0 <> <> 0 2073 <> 0 0 1 <> <> <> <> <>
  2074 3 50.320862 48.185456 22.526354 155 N A 2 -0.12000 -0.12000 "ASN " " CB " "    " 6 0 0 0 A0A0A0  C2071  0 <> 1 0 0 0 0 0 0 <> <> 0 2074 <> 0 0 1 <> <> <> <> <>
  2075 2 49.118965 49.066426 22.908603 155 N A 2 0.50000 0.50000 "ASN " " CG " "    " 6 0 0 0 A0A0A0  C2072  0 <> 1 0 0 0 0 0 0 <> <> 0 2075 <> 0 0 1 <> <> <> <> <>
  2076 15 48.249375 49.352803 22.087834 155 N A 70 -0.50000 -0.50000 "ASN " " OD1" "    " 8 0 0 0 FF2F2F  O2073  0 <> 1 0 0 0 0 0 0 <> <> 0 2076 <> 0 0 1 <> <> <> <> <>
  2077 25 49.023690 49.433876 24.180205 155 N A 43 -0.76000 -0.76000 "ASN " " ND2" "    " 7 0 0 0 5757FF  N2074  0 <> 1 0 0 0 0 0 0 <> <> 0 2077 <> 0 0 1 <> <> <> <> <>
  2078 43 49.620929 48.710753 20.127994 155 N A 21 0.30000 0.30000 "ASN " " H  " "    " 1 0 0 0 FFFFFF  H2075  0 <> 1 0 0 0 0 0 0 <> <> 0 2078 <> 0 0 1 <> <> <> <> <>
  2079 41 50.931118 46.446931 21.396102 155 N A 21 0.06000 0.06000 "ASN " " HA " "    " 1 0 0 0 FFFFFF  H2076  0 <> 1 0 0 0 0 0 0 <> <> 0 2079 <> 0 0 1 <> <> <> <> <>
  2080 41 50.690445 47.694135 23.427841 155 N A 21 0.06000 0.06000 "ASN " "1HB " "    " 1 0 0 0 FFFFFF  H2077  0 <> 1 0 0 0 0 0 0 <> <> 0 2080 <> 0 0 1 <> <> <> <> <>
  2081 41 51.135461 48.824845 22.190035 155 N A 21 0.06000 0.06000 "ASN " "2HB " "    " 1 0 0 0 FFFFFF  H2078  0 <> 1 0 0 0 0 0 0 <> <> 0 2081 <> 0 0 1 <> <> <> <> <>
  2082 43 48.211211 49.959086 24.514870 155 N A 21 0.38000 0.38000 "ASN " "1HD2" "    " 1 0 0 0 FFFFFF  H2079  0 <> 1 0 0 0 0 0 0 <> <> 0 2082 <> 0 0 1 <> <> <> <> <>
  2083 43 49.702091 49.122672 24.854882 155 N A 21 0.38000 0.38000 "ASN " "2HD2" "    " 1 0 0 0 FFFFFF  H2080  0 <> 1 0 0 0 0 0 0 <> <> 0 2083 <> 0 0 1 <> <> <> <> <>
  2084 25 47.763639 46.241206 21.170010 156 G A 43 -0.50000 -0.50000 "GLY " " N  " "    " 7 0 0 0 5757FF  N2081  0 <> 1 0 0 0 0 0 0 <> <> 0 2084 <> 0 0 1 <> <> <> <> <>
  2085 3 46.497136 45.588185 21.464830 156 G A 2 0.08000 0.08000 "GLY " " CA " "    " 6 0 0 0 A0A0A0  C2082  0 <> 1 0 0 0 0 0 0 <> <> 0 2085 <> 0 0 1 <> <> <> <> <>
  2086 2 45.350088 46.597846 21.528002 156 G A 2 0.50000 0.50000 "GLY " " C  " "    " 6 0 0 0 A0A0A0  C2083  0 <> 1 0 0 0 0 0 0 <> <> 0 2086 <> 0 0 1 <> <> <> <> <>
  2087 15 44.205481 46.214348 21.304924 156 G A 70 -0.50000 -0.50000 "GLY " " O  " "    " 8 0 0 0 FF2F2F  O2084  0 <> 1 0 0 0 0 0 0 <> <> 0 2087 <> 0 0 1 <> <> <> <> <>
  2088 43 47.812355 46.807273 20.339215 156 G A 21 0.30000 0.30000 "GLY " " H  " "    " 1 0 0 0 FFFFFF  H2085  0 <> 1 0 0 0 0 0 0 <> <> 0 2088 <> 0 0 1 <> <> <> <> <>
  2089 41 46.287079 44.853400 20.687311 156 G A 21 0.06000 0.06000 "GLY " "1HA " "    " 1 0 0 0 FFFFFF  H2086  0 <> 1 0 0 0 0 0 0 <> <> 0 2089 <> 0 0 1 <> <> <> <> <>
  2090 41 46.529399 45.044346 22.410695 156 G A 21 0.06000 0.06000 "GLY " "2HA " "    " 1 0 0 0 FFFFFF  H2087  0 <> 1 0 0 0 0 0 0 <> <> 0 2090 <> 0 0 1 <> <> <> <> <>
  2091 25 45.638206 47.879415 21.804160 157 Q A 43 -0.50000 -0.50000 "GLN " " N  " "    " 7 0 0 0 5757FF  N2088  0 <> 1 0 0 0 0 0 0 <> <> 0 2091 <> 0 0 1 <> <> <> <> <>
  2092 3 44.614191 48.908277 21.966715 157 Q A 2 0.14000 0.14000 "GLN " " CA " "    " 6 0 0 0 A0A0A0  C2089  0 <> 1 0 0 0 0 0 0 <> <> 0 2092 <> 0 0 1 <> <> <> <> <>
  2093 2 44.336052 49.654416 20.657896 157 Q A 2 0.50000 0.50000 "GLN " " C  " "    " 6 0 0 0 A0A0A0  C2090  0 <> 1 0 0 0 0 0 0 <> <> 0 2093 <> 0 0 1 <> <> <> <> <>
  2094 15 43.179114 49.939175 20.361179 157 Q A 70 -0.50000 -0.50000 "GLN " " O  " "    " 8 0 0 0 FF2F2F  O2091  0 <> 1 0 0 0 0 0 0 <> <> 0 2094 <> 0 0 1 <> <> <> <> <>
  2095 3 45.096825 49.959742 22.975601 157 Q A 2 -0.12000 -0.12000 "GLN " " CB " "    " 6 0 0 0 A0A0A0  C2092  0 <> 1 0 0 0 0 0 0 <> <> 0 2095 <> 0 0 1 <> <> <> <> <>
  2096 3 45.280420 49.412480 24.396417 157 Q A 2 -0.12000 -0.12000 "GLN " " CG " "    " 6 0 0 0 A0A0A0  C2093  0 <> 1 0 0 0 0 0 0 <> <> 0 2096 <> 0 0 1 <> <> <> <> <>
  2097 2 45.764459 50.525676 25.309588 157 Q A 2 0.50000 0.50000 "GLN " " CD " "    " 6 0 0 0 A0A0A0  C2094  0 <> 1 0 0 0 0 0 0 <> <> 0 2097 <> 0 0 1 <> <> <> <> <>
  2098 15 46.960988 50.675574 25.545670 157 Q A 70 -0.50000 -0.50000 "GLN " " OE1" "    " 8 0 0 0 FF2F2F  O2095  0 <> 1 0 0 0 0 0 0 <> <> 0 2098 <> 0 0 1 <> <> <> <> <>
  2099 25 44.845834 51.344407 25.789208 157 Q A 43 -0.76000 -0.76000 "GLN " " NE2" "    " 7 0 0 0 5757FF  N2096  0 <> 1 0 0 0 0 0 0 <> <> 0 2099 <> 0 0 1 <> <> <> <> <>
  2100 43 46.600060 48.139667 21.992889 157 Q A 21 0.30000 0.30000 "GLN " " H  " "    " 1 0 0 0 FFFFFF  H2097  0 <> 1 0 0 0 0 0 0 <> <> 0 2100 <> 0 0 1 <> <> <> <> <>
  2101 41 43.685466 48.475362 22.325068 157 Q A 21 0.06000 0.06000 "GLN " " HA " "    " 1 0 0 0 FFFFFF  H2098  0 <> 1 0 0 0 0 0 0 <> <> 0 2101 <> 0 0 1 <> <> <> <> <>
  2102 41 46.021117 50.427152 22.636469 157 Q A 21 0.06000 0.06000 "GLN " "1HB " "    " 1 0 0 0 FFFFFF  H2099  0 <> 1 0 0 0 0 0 0 <> <> 0 2102 <> 0 0 1 <> <> <> <> <>
  2103 41 44.356426 50.761955 23.018630 157 Q A 21 0.06000 0.06000 "GLN " "2HB " "    " 1 0 0 0 FFFFFF  H2100  0 <> 1 0 0 0 0 0 0 <> <> 0 2103 <> 0 0 1 <> <> <> <> <>
  2104 41 44.338445 49.011486 24.772322 157 Q A 21 0.06000 0.06000 "GLN " "1HG " "    " 1 0 0 0 FFFFFF  H2101  0 <> 1 0 0 0 0 0 0 <> <> 0 2104 <> 0 0 1 <> <> <> <> <>
  2105 41 46.002107 48.595423 24.418288 157 Q A 21 0.06000 0.06000 "GLN " "2HG " "    " 1 0 0 0 FFFFFF  H2102  0 <> 1 0 0 0 0 0 0 <> <> 0 2105 <> 0 0 1 <> <> <> <> <>
  2106 43 45.076541 52.054158 26.475035 157 Q A 21 0.38000 0.38000 "GLN " "1HE2" "    " 1 0 0 0 FFFFFF  H2103  0 <> 1 0 0 0 0 0 0 <> <> 0 2106 <> 0 0 1 <> <> <> <> <>
  2107 43 43.852944 51.140183 25.632565 157 Q A 21 0.38000 0.38000 "GLN " "2HE2" "    " 1 0 0 0 FFFFFF  H2104  0 <> 1 0 0 0 0 0 0 <> <> 0 2107 <> 0 0 1 <> <> <> <> <>
  2108 25 45.385856 50.020897 19.913469 158 L A 43 -0.50000 -0.50000 "LEU " " N  " "    " 7 0 0 0 5757FF  N2105  2 <> 1 0 0 0 0 0 0 <> <> 0 2108 <> 0 0 1 <> <> <> <> <>
  2109 3 45.282219 50.883231 18.735903 158 L A 2 0.14000 0.14000 "LEU " " CA " "    " 6 0 0 0 A0A0A0  C2106  2 <> 1 0 0 0 0 0 0 <> <> 0 2109 <> 0 0 1 <> <> <> <> <>
  2110 2 44.863266 50.090749 17.482147 158 L A 2 0.50000 0.50000 "LEU " " C  " "    " 6 0 0 0 A0A0A0  C2107  2 <> 1 0 0 0 0 0 0 <> <> 0 2110 <> 0 0 1 <> <> <> <> <>
  2111 15 44.891547 48.855979 17.460235 158 L A 70 -0.50000 -0.50000 "LEU " " O  " "    " 8 0 0 0 FF2F2F  O2108  2 <> 1 0 0 0 0 0 0 <> <> 0 2111 <> 0 0 1 <> <> <> <> <>
  2112 3 46.658569 51.553625 18.477670 158 L A 2 -0.12000 -0.12000 "LEU " " CB " "    " 6 0 0 0 A0A0A0  C2109  2 <> 1 0 0 0 0 0 0 <> <> 0 2112 <> 0 0 1 <> <> <> <> <>
  2113 3 46.619172 53.096758 18.553365 158 L A 2 -0.06000 -0.06000 "LEU " " CG " "    " 6 0 0 0 A0A0A0  C2110  2 <> 1 0 0 0 0 0 0 <> <> 0 2113 <> 0 0 1 <> <> <> <> <>
  2114 3 48.045201 53.655595 18.577108 158 L A 2 -0.18000 -0.18000 "LEU " " CD1" "    " 6 0 0 0 A0A0A0  C2111  2 <> 1 0 0 0 0 0 0 <> <> 0 2114 <> 0 0 1 <> <> <> <> <>
  2115 3 45.813698 53.741471 17.410396 158 L A 2 -0.18000 -0.18000 "LEU " " CD2" "    " 6 0 0 0 A0A0A0  C2112  2 <> 1 0 0 0 0 0 0 <> <> 0 2115 <> 0 0 1 <> <> <> <> <>
  2116 43 46.304700 49.755337 20.231897 158 L A 21 0.30000 0.30000 "LEU " " H  " "    " 1 0 0 0 FFFFFF  H2113  2 <> 1 0 0 0 0 0 0 <> <> 0 2116 <> 0 0 1 <> <> <> <> <>
  2117 41 44.533501 51.648538 18.937909 158 L A 21 0.06000 0.06000 "LEU " " HA " "    " 1 0 0 0 FFFFFF  H2114  2 <> 1 0 0 0 0 0 0 <> <> 0 2117 <> 0 0 1 <> <> <> <> <>
  2118 41 47.384933 51.192173 19.207279 158 L A 21 0.06000 0.06000 "LEU " "1HB " "    " 1 0 0 0 FFFFFF  H2115  2 <> 1 0 0 0 0 0 0 <> <> 0 2118 <> 0 0 1 <> <> <> <> <>
  2119 41 47.082972 51.258137 17.514907 158 L A 21 0.06000 0.06000 "LEU " "2HB " "    " 1 0 0 0 FFFFFF  H2116  2 <> 1 0 0 0 0 0 0 <> <> 0 2119 <> 0 0 1 <> <> <> <> <>
  2120 41 46.147149 53.377572 19.496257 158 L A 21 0.06000 0.06000 "LEU " " HG " "    " 1 0 0 0 FFFFFF  H2117  2 <> 1 0 0 0 0 0 0 <> <> 0 2120 <> 0 0 1 <> <> <> <> <>
  2121 41 48.052114 54.742212 18.667298 158 L A 21 0.06000 0.06000 "LEU " "1HD1" "    " 1 0 0 0 FFFFFF  H2118  2 <> 1 0 0 0 0 0 0 <> <> 0 2121 <> 0 0 1 <> <> <> <> <>
  2122 41 48.585244 53.247662 19.429603 158 L A 21 0.06000 0.06000 "LEU " "2HD1" "    " 1 0 0 0 FFFFFF  H2119  2 <> 1 0 0 0 0 0 0 <> <> 0 2122 <> 0 0 1 <> <> <> <> <>
  2123 41 48.594668 53.388041 17.672988 158 L A 21 0.06000 0.06000 "LEU " "3HD1" "    " 1 0 0 0 FFFFFF  H2120  2 <> 1 0 0 0 0 0 0 <> <> 0 2123 <> 0 0 1 <> <> <> <> <>
  2124 41 45.852387 54.829852 17.466530 158 L A 21 0.06000 0.06000 "LEU " "1HD2" "    " 1 0 0 0 FFFFFF  H2121  2 <> 1 0 0 0 0 0 0 <> <> 0 2124 <> 0 0 1 <> <> <> <> <>
  2125 41 46.205760 53.454615 16.432904 158 L A 21 0.06000 0.06000 "LEU " "2HD2" "    " 1 0 0 0 FFFFFF  H2122  2 <> 1 0 0 0 0 0 0 <> <> 0 2125 <> 0 0 1 <> <> <> <> <>
  2126 41 44.759216 53.466571 17.443924 158 L A 21 0.06000 0.06000 "LEU " "3HD2" "    " 1 0 0 0 FFFFFF  H2123  2 <> 1 0 0 0 0 0 0 <> <> 0 2126 <> 0 0 1 <> <> <> <> <>
  2127 25 44.517121 50.829103 16.426074 159 E A 43 -0.50000 -0.50000 "GLU " " N  " "    " 7 0 0 0 5757FF  N2124  2 <> 1 0 0 0 0 0 0 <> <> 0 2127 <> 0 0 1 <> <> <> <> <>
  2128 3 44.276424 50.390052 15.063585 159 E A 2 0.14000 0.14000 "GLU " " CA " "    " 6 0 0 0 A0A0A0  C2125  2 <> 1 0 0 0 0 0 0 <> <> 0 2128 <> 0 0 1 <> <> <> <> <>
  2129 2 44.576530 51.582688 14.158603 159 E A 2 0.50000 0.50000 "GLU " " C  " "    " 6 0 0 0 A0A0A0  C2126  2 <> 1 0 0 0 0 0 0 <> <> 0 2129 <> 0 0 1 <> <> <> <> <>
  2130 15 44.208661 52.711561 14.495671 159 E A 70 -0.50000 -0.50000 "GLU " " O  " "    " 8 0 0 0 FF2F2F  O2127  2 <> 1 0 0 0 0 0 0 <> <> 0 2130 <> 0 0 1 <> <> <> <> <>
  2131 3 42.818991 49.925891 14.887802 159 E A 2 -0.12000 -0.12000 "GLU " " CB " "    " 6 0 0 0 A0A0A0  C2128  2 <> 1 0 0 0 0 0 0 <> <> 0 2131 <> 0 0 1 <> <> <> <> <>
  2132 3 42.554737 48.973854 13.706842 159 E A 2 -0.22000 -0.22000 "GLU " " CG " "    " 6 0 0 0 A0A0A0  C2129  2 <> 1 0 0 0 0 0 0 <> <> 0 2132 <> 0 0 1 <> <> <> <> <>
  2133 2 42.918398 47.555387 14.066139 159 E A 2 0.70000 0.70000 "GLU " " CD " "    " 6 0 0 0 A0A0A0  C2130  2 <> 1 0 0 0 0 0 0 <> <> 0 2133 <> 0 0 1 <> <> <> <> <>
  2134 18 44.125559 47.258276 14.144990 159 E A 70 -0.80000 -0.80000 "GLU " " OE1" "    " 8 -1 0 0 FF2F2F  O2131  2 <> 1 0 0 0 0 0 0 <> <> 0 2134 <> 0 0 1 <> <> <> <> <>
  2135 15 42.002961 46.827785 14.501509 159 E A 70 -0.80000 -0.80000 "GLU " " OE2" "    " 8 0 0 0 FF2F2F  O2132  2 <> 1 0 0 0 0 0 0 <> <> 0 2135 <> 0 0 1 <> <> <> <> <>
  2136 43 44.483581 51.833747 16.541884 159 E A 21 0.30000 0.30000 "GLU " " H  " "    " 1 0 0 0 FFFFFF  H2133  2 <> 1 0 0 0 0 0 0 <> <> 0 2136 <> 0 0 1 <> <> <> <> <>
  2137 41 44.974057 49.580792 14.841503 159 E A 21 0.06000 0.06000 "GLU " " HA " "    " 1 0 0 0 FFFFFF  H2134  2 <> 1 0 0 0 0 0 0 <> <> 0 2137 <> 0 0 1 <> <> <> <> <>
  2138 41 42.483701 49.460297 15.807955 159 E A 21 0.06000 0.06000 "GLU " "1HB " "    " 1 0 0 0 FFFFFF  H2135  2 <> 1 0 0 0 0 0 0 <> <> 0 2138 <> 0 0 1 <> <> <> <> <>
  2139 41 42.186653 50.801263 14.759612 159 E A 21 0.06000 0.06000 "GLU " "2HB " "    " 1 0 0 0 FFFFFF  H2136  2 <> 1 0 0 0 0 0 0 <> <> 0 2139 <> 0 0 1 <> <> <> <> <>
  2140 41 41.492215 48.976267 13.472664 159 E A 21 0.06000 0.06000 "GLU " "1HG " "    " 1 0 0 0 FFFFFF  H2137  2 <> 1 0 0 0 0 0 0 <> <> 0 2140 <> 0 0 1 <> <> <> <> <>
  2141 41 43.081284 49.278638 12.802360 159 E A 21 0.06000 0.06000 "GLU " "2HG " "    " 1 0 0 0 FFFFFF  H2138  2 <> 1 0 0 0 0 0 0 <> <> 0 2141 <> 0 0 1 <> <> <> <> <>
  2142 25 45.161903 51.318684 12.992792 160 F A 43 -0.50000 -0.50000 "PHE " " N  " "    " 7 0 0 0 5757FF  N2139  2 <> 1 0 0 0 0 0 0 <> <> 0 2142 <> 0 0 1 <> <> <> <> <>
  2143 3 45.217573 52.258542 11.884530 160 F A 2 0.14000 0.14000 "PHE " " CA " "    " 6 0 0 0 A0A0A0  C2140  2 <> 1 0 0 0 0 0 0 <> <> 0 2143 <> 0 0 1 <> <> <> <> <>
  2144 2 44.249048 51.680796 10.855603 160 F A 2 0.50000 0.50000 "PHE " " C  " "    " 6 0 0 0 A0A0A0  C2141  2 <> 1 0 0 0 0 0 0 <> <> 0 2144 <> 0 0 1 <> <> <> <> <>
  2145 15 44.571072 50.691862 10.196610 160 F A 70 -0.50000 -0.50000 "PHE " " O  " "    " 8 0 0 0 FF2F2F  O2142  2 <> 1 0 0 0 0 0 0 <> <> 0 2145 <> 0 0 1 <> <> <> <> <>
  2146 3 46.653304 52.320883 11.330982 160 F A 2 -0.00500 -0.00500 "PHE " " CB " "    " 6 0 0 0 A0A0A0  C2143  2 <> 1 0 0 0 0 0 0 <> <> 0 2146 <> 0 0 1 <> <> <> <> <>
  2147 2 47.640144 52.894597 12.330709 160 F A 2 -0.11500 -0.11500 "PHE " " CG " "    " 6 0 0 0 A0A0A0  C2144  2 <> 1 0 0 0 0 0 0 <> <> 0 2147 <> 0 0 1 <> <> <> <> <>
  2148 2 48.612584 52.068190 12.930371 160 F A 2 -0.11500 -0.11500 "PHE " " CD2" "    " 6 0 0 0 A0A0A0  C2145  2 <> 1 0 0 0 0 0 0 <> <> 0 2148 <> 0 0 1 <> <> <> <> <>
  2149 2 47.541528 54.248455 12.712457 160 F A 2 -0.11500 -0.11500 "PHE " " CD1" "    " 6 0 0 0 A0A0A0  C2146  2 <> 1 0 0 0 0 0 0 <> <> 0 2149 <> 0 0 1 <> <> <> <> <>
  2150 2 49.477830 52.595058 13.907455 160 F A 2 -0.11500 -0.11500 "PHE " " CE2" "    " 6 0 0 0 A0A0A0  C2147  2 <> 1 0 0 0 0 0 0 <> <> 0 2150 <> 0 0 1 <> <> <> <> <>
  2151 2 48.413954 54.775388 13.681171 160 F A 2 -0.11500 -0.11500 "PHE " " CE1" "    " 6 0 0 0 A0A0A0  C2148  2 <> 1 0 0 0 0 0 0 <> <> 0 2151 <> 0 0 1 <> <> <> <> <>
  2152 2 49.383935 53.948913 14.280608 160 F A 2 -0.11500 -0.11500 "PHE " " CZ " "    " 6 0 0 0 A0A0A0  C2149  2 <> 1 0 0 0 0 0 0 <> <> 0 2152 <> 0 0 1 <> <> <> <> <>
  2153 43 45.344643 50.352356 12.763922 160 F A 21 0.30000 0.30000 "PHE " " H  " "    " 1 0 0 0 FFFFFF  H2150  2 <> 1 0 0 0 0 0 0 <> <> 0 2153 <> 0 0 1 <> <> <> <> <>
  2154 41 44.904007 53.260725 12.174249 160 F A 21 0.06000 0.06000 "PHE " " HA " "    " 1 0 0 0 FFFFFF  H2151  2 <> 1 0 0 0 0 0 0 <> <> 0 2154 <> 0 0 1 <> <> <> <> <>
  2155 41 46.990070 51.335741 11.004320 160 F A 21 0.06000 0.06000 "PHE " "1HB " "    " 1 0 0 0 FFFFFF  H2152  2 <> 1 0 0 0 0 0 0 <> <> 0 2155 <> 0 0 1 <> <> <> <> <>
  2156 41 46.668966 52.956254 10.444648 160 F A 21 0.06000 0.06000 "PHE " "2HB " "    " 1 0 0 0 FFFFFF  H2153  2 <> 1 0 0 0 0 0 0 <> <> 0 2156 <> 0 0 1 <> <> <> <> <>
  2157 41 48.676221 51.021458 12.671585 160 F A 21 0.11500 0.11500 "PHE " " HD2" "    " 1 0 0 0 FFFFFF  H2154  2 <> 1 0 0 0 0 0 0 <> <> 0 2157 <> 0 0 1 <> <> <> <> <>
  2158 41 46.778587 54.883705 12.285184 160 F A 21 0.11500 0.11500 "PHE " " HD1" "    " 1 0 0 0 FFFFFF  H2155  2 <> 1 0 0 0 0 0 0 <> <> 0 2158 <> 0 0 1 <> <> <> <> <>
  2159 41 50.193508 51.949697 14.390650 160 F A 21 0.11500 0.11500 "PHE " " HE2" "    " 1 0 0 0 FFFFFF  H2156  2 <> 1 0 0 0 0 0 0 <> <> 0 2159 <> 0 0 1 <> <> <> <> <>
  2160 41 48.320906 55.811870 13.970828 160 F A 21 0.11500 0.11500 "PHE " " HE1" "    " 1 0 0 0 FFFFFF  H2157  2 <> 1 0 0 0 0 0 0 <> <> 0 2160 <> 0 0 1 <> <> <> <> <>
  2161 41 50.040114 54.347551 15.039825 160 F A 21 0.11500 0.11500 "PHE " " HZ " "    " 1 0 0 0 FFFFFF  H2158  2 <> 1 0 0 0 0 0 0 <> <> 0 2161 <> 0 0 1 <> <> <> <> <>
  2162 25 43.043081 52.245732 10.786199 161 V A 43 -0.50000 -0.50000 "VAL " " N  " "    " 7 0 0 0 5757FF  N2159  0 <> 1 0 0 0 0 0 0 <> <> 0 2162 <> 0 0 1 <> <> <> <> <>
  2163 3 41.980431 51.834803 9.879085 161 V A 2 0.14000 0.14000 "VAL " " CA " "    " 6 0 0 0 A0A0A0  C2160  0 <> 1 0 0 0 0 0 0 <> <> 0 2163 <> 0 0 1 <> <> <> <> <>
  2164 2 42.064331 52.797281 8.691375 161 V A 2 0.50000 0.50000 "VAL " " C  " "    " 6 0 0 0 A0A0A0  C2161  0 <> 1 0 0 0 0 0 0 <> <> 0 2164 <> 0 0 1 <> <> <> <> <>
  2165 15 42.099715 54.007257 8.883397 161 V A 70 -0.50000 -0.50000 "VAL " " O  " "    " 8 0 0 0 FF2F2F  O2162  0 <> 1 0 0 0 0 0 0 <> <> 0 2165 <> 0 0 1 <> <> <> <> <>
  2166 3 40.618418 51.905405 10.621329 161 V A 2 -0.06000 -0.06000 "VAL " " CB " "    " 6 0 0 0 A0A0A0  C2163  0 <> 1 0 0 0 0 0 0 <> <> 0 2166 <> 0 0 1 <> <> <> <> <>
  2167 3 40.585883 50.877193 11.753587 161 V A 2 -0.18000 -0.18000 "VAL " " CG1" "    " 6 0 0 0 A0A0A0  C2164  0 <> 1 0 0 0 0 0 0 <> <> 0 2167 <> 0 0 1 <> <> <> <> <>
  2168 3 40.208466 53.275599 11.201504 161 V A 2 -0.18000 -0.18000 "VAL " " CG2" "    " 6 0 0 0 A0A0A0  C2165  0 <> 1 0 0 0 0 0 0 <> <> 0 2168 <> 0 0 1 <> <> <> <> <>
  2169 43 42.892834 53.126953 11.274994 161 V A 21 0.30000 0.30000 "VAL " " H  " "    " 1 0 0 0 FFFFFF  H2166  0 <> 1 0 0 0 0 0 0 <> <> 0 2169 <> 0 0 1 <> <> <> <> <>
  2170 41 42.139070 50.813261 9.527836 161 V A 21 0.06000 0.06000 "VAL " " HA " "    " 1 0 0 0 FFFFFF  H2167  0 <> 1 0 0 0 0 0 0 <> <> 0 2170 <> 0 0 1 <> <> <> <> <>
  2171 41 39.860574 51.605001 9.900426 161 V A 21 0.06000 0.06000 "VAL " " HB " "    " 1 0 0 0 FFFFFF  H2168  0 <> 1 0 0 0 0 0 0 <> <> 0 2171 <> 0 0 1 <> <> <> <> <>
  2172 41 39.622022 50.875156 12.257060 161 V A 21 0.06000 0.06000 "VAL " "1HG1" "    " 1 0 0 0 FFFFFF  H2169  0 <> 1 0 0 0 0 0 0 <> <> 0 2172 <> 0 0 1 <> <> <> <> <>
  2173 41 40.778162 49.872737 11.377454 161 V A 21 0.06000 0.06000 "VAL " "2HG1" "    " 1 0 0 0 FFFFFF  H2170  0 <> 1 0 0 0 0 0 0 <> <> 0 2173 <> 0 0 1 <> <> <> <> <>
  2174 41 41.336559 51.111490 12.505697 161 V A 21 0.06000 0.06000 "VAL " "3HG1" "    " 1 0 0 0 FFFFFF  H2171  0 <> 1 0 0 0 0 0 0 <> <> 0 2174 <> 0 0 1 <> <> <> <> <>
  2175 41 39.197843 53.239284 11.603484 161 V A 21 0.06000 0.06000 "VAL " "1HG2" "    " 1 0 0 0 FFFFFF  H2172  0 <> 1 0 0 0 0 0 0 <> <> 0 2175 <> 0 0 1 <> <> <> <> <>
  2176 41 40.862077 53.585941 12.013564 161 V A 21 0.06000 0.06000 "VAL " "2HG2" "    " 1 0 0 0 FFFFFF  H2173  0 <> 1 0 0 0 0 0 0 <> <> 0 2176 <> 0 0 1 <> <> <> <> <>
  2177 41 40.196901 54.065968 10.455485 161 V A 21 0.06000 0.06000 "VAL " "3HG2" "    " 1 0 0 0 FFFFFF  H2174  0 <> 1 0 0 0 0 0 0 <> <> 0 2177 <> 0 0 1 <> <> <> <> <>
  2178 25 42.284492 52.281823 7.482178 162 T A 43 -0.50000 -0.50000 "THR " " N  " "    " 7 0 0 0 5757FF  N2175  0 <> 1 0 0 0 0 0 0 <> <> 0 2178 <> 0 0 1 <> <> <> <> <>
  2179 3 42.608421 53.012540 6.250406 162 T A 2 0.14000 0.14000 "THR " " CA " "    " 6 0 0 0 A0A0A0  C2176  0 <> 1 0 0 0 0 0 0 <> <> 0 2179 <> 0 0 1 <> <> <> <> <>
  2180 2 44.099998 53.391036 6.271684 162 T A 2 0.50000 0.50000 "THR " " C  " "    " 6 0 0 0 A0A0A0  C2177  0 <> 1 0 0 0 0 0 0 <> <> 0 2180 <> 0 0 1 <> <> <> <> <>
  2181 15 44.824159 53.104467 5.322219 162 T A 70 -0.50000 -0.50000 "THR " " O  " "    " 8 0 0 0 FF2F2F  O2178  0 <> 1 0 0 0 0 0 0 <> <> 0 2181 <> 0 0 1 <> <> <> <> <>
  2182 3 41.632941 54.192316 5.943920 162 T A 2 0.20500 0.20500 "THR " " CB " "    " 6 0 0 0 A0A0A0  C2179  0 <> 1 0 0 0 0 0 0 <> <> 0 2182 <> 0 0 1 <> <> <> <> <>
  2183 16 40.316711 53.679833 5.914847 162 T A 70 -0.68300 -0.68300 "THR " " OG1" "    " 8 0 0 0 FF2F2F  O2180  0 <> 1 0 0 0 0 0 0 <> <> 0 2183 <> 0 0 1 <> <> <> <> <>
  2184 3 41.864322 54.862775 4.581803 162 T A 2 -0.18000 -0.18000 "THR " " CG2" "    " 6 0 0 0 A0A0A0  C2181  0 <> 1 0 0 0 0 0 0 <> <> 0 2184 <> 0 0 1 <> <> <> <> <>
  2185 43 42.326717 51.267505 7.407939 162 T A 21 0.30000 0.30000 "THR " " H  " "    " 1 0 0 0 FFFFFF  H2182  0 <> 1 0 0 0 0 0 0 <> <> 0 2185 <> 0 0 1 <> <> <> <> <>
  2186 41 42.486690 52.290559 5.442310 162 T A 21 0.06000 0.06000 "THR " " HA " "    " 1 0 0 0 FFFFFF  H2183  0 <> 1 0 0 0 0 0 0 <> <> 0 2186 <> 0 0 1 <> <> <> <> <>
  2187 41 41.693683 54.968786 6.705925 162 T A 21 0.06000 0.06000 "THR " " HB " "    " 1 0 0 0 FFFFFF  H2184  0 <> 1 0 0 0 0 0 0 <> <> 0 2187 <> 0 0 1 <> <> <> <> <>
  2188 42 39.688743 54.395675 6.012459 162 T A 21 0.41800 0.41800 "THR " " HG1" "    " 1 0 0 0 FFFFFF  H2185  0 <> 1 0 0 0 0 0 0 <> <> 0 2188 <> 0 0 1 <> <> <> <> <>
  2189 41 41.134499 55.653278 4.402730 162 T A 21 0.06000 0.06000 "THR " "1HG2" "    " 1 0 0 0 FFFFFF  H2186  0 <> 1 0 0 0 0 0 0 <> <> 0 2189 <> 0 0 1 <> <> <> <> <>
  2190 41 42.852411 55.320218 4.525355 162 T A 21 0.06000 0.06000 "THR " "2HG2" "    " 1 0 0 0 FFFFFF  H2187  0 <> 1 0 0 0 0 0 0 <> <> 0 2190 <> 0 0 1 <> <> <> <> <>
  2191 41 41.778247 54.141272 3.768462 162 T A 21 0.06000 0.06000 "THR " "3HG2" "    " 1 0 0 0 FFFFFF  H2188  0 <> 1 0 0 0 0 0 0 <> <> 0 2191 <> 0 0 1 <> <> <> <> <>
  2192 25 44.561293 53.962738 7.397182 163 G A 43 -0.50000 -0.50000 "GLY " " N  " "    " 7 0 0 0 5757FF  N2189  0 <> 1 0 0 0 0 0 0 <> <> 0 2192 <> 0 0 1 <> <> <> <> <>
  2193 3 45.846011 54.610247 7.651903 163 G A 2 0.08000 0.08000 "GLY " " CA " "    " 6 0 0 0 A0A0A0  C2190  0 <> 1 0 0 0 0 0 0 <> <> 0 2193 <> 0 0 1 <> <> <> <> <>
  2194 2 46.440998 55.300472 6.427127 163 G A 2 0.50000 0.50000 "GLY " " C  " "    " 6 0 0 0 A0A0A0  C2191  0 <> 1 0 0 0 0 0 0 <> <> 0 2194 <> 0 0 1 <> <> <> <> <>
  2195 15 47.539309 54.972206 5.983552 163 G A 70 -0.50000 -0.50000 "GLY " " O  " "    " 8 0 0 0 FF2F2F  O2192  0 <> 1 0 0 0 0 0 0 <> <> 0 2195 <> 0 0 1 <> <> <> <> <>
  2196 43 43.839003 54.114052 8.097289 163 G A 21 0.30000 0.30000 "GLY " " H  " "    " 1 0 0 0 FFFFFF  H2193  0 <> 1 0 0 0 0 0 0 <> <> 0 2196 <> 0 0 1 <> <> <> <> <>
  2197 41 45.706877 55.347314 8.442428 163 G A 21 0.06000 0.06000 "GLY " "1HA " "    " 1 0 0 0 FFFFFF  H2194  0 <> 1 0 0 0 0 0 0 <> <> 0 2197 <> 0 0 1 <> <> <> <> <>
  2198 41 46.553367 53.880656 8.036278 163 G A 21 0.06000 0.06000 "GLY " "2HA " "    " 1 0 0 0 FFFFFF  H2195  0 <> 1 0 0 0 0 0 0 <> <> 0 2198 <> 0 0 1 <> <> <> <> <>
  2199 25 45.674857 56.257275 5.907105 164 G A 43 -0.50000 -0.50000 "GLY " " N  " "    " 7 0 0 0 5757FF  N2196  0 <> 1 0 0 0 0 0 0 <> <> 0 2199 <> 0 0 1 <> <> <> <> <>
  2200 3 46.013081 57.126756 4.799434 164 G A 2 0.08000 0.08000 "GLY " " CA " "    " 6 0 0 0 A0A0A0  C2197  0 <> 1 0 0 0 0 0 0 <> <> 0 2200 <> 0 0 1 <> <> <> <> <>
  2201 2 46.202601 58.527228 5.368809 164 G A 2 0.50000 0.50000 "GLY " " C  " "    " 6 0 0 0 A0A0A0  C2198  0 <> 1 0 0 0 0 0 0 <> <> 0 2201 <> 0 0 1 <> <> <> <> <>
  2202 15 45.952465 58.764449 6.550704 164 G A 70 -0.50000 -0.50000 "GLY " " O  " "    " 8 0 0 0 FF2F2F  O2199  0 <> 1 0 0 0 0 0 0 <> <> 0 2202 <> 0 0 1 <> <> <> <> <>
  2203 43 44.875075 56.554768 6.453107 164 G A 21 0.30000 0.30000 "GLY " " H  " "    " 1 0 0 0 FFFFFF  H2200  0 <> 1 0 0 0 0 0 0 <> <> 0 2203 <> 0 0 1 <> <> <> <> <>
  2204 41 46.902520 56.792612 4.266281 164 G A 21 0.06000 0.06000 "GLY " "1HA " "    " 1 0 0 0 FFFFFF  H2201  0 <> 1 0 0 0 0 0 0 <> <> 0 2204 <> 0 0 1 <> <> <> <> <>
  2205 41 45.184716 57.141045 4.090917 164 G A 21 0.06000 0.06000 "GLY " "2HA " "    " 1 0 0 0 FFFFFF  H2202  0 <> 1 0 0 0 0 0 0 <> <> 0 2205 <> 0 0 1 <> <> <> <> <>
  2206 25 46.676384 59.476566 4.561348 165 W A 43 -0.50000 -0.50000 "TRP " " N  " "    " 7 0 0 0 5757FF  N2203  0 <> 1 0 0 0 0 0 0 <> <> 0 2206 <> 0 0 1 <> <> <> <> <>
  2207 3 46.875511 60.857235 5.000860 165 W A 2 0.14000 0.14000 "TRP " " CA " "    " 6 0 0 0 A0A0A0  C2204  0 <> 1 0 0 0 0 0 0 <> <> 0 2207 <> 0 0 1 <> <> <> <> <>
  2208 2 45.552888 61.502922 5.461998 165 W A 2 0.50000 0.50000 "TRP " " C  " "    " 6 0 0 0 A0A0A0  C2205  0 <> 1 0 0 0 0 0 0 <> <> 0 2208 <> 0 0 1 <> <> <> <> <>
  2209 15 45.550995 62.274706 6.419878 165 W A 70 -0.50000 -0.50000 "TRP " " O  " "    " 8 0 0 0 FF2F2F  O2206  0 <> 1 0 0 0 0 0 0 <> <> 0 2209 <> 0 0 1 <> <> <> <> <>
  2210 3 47.546549 61.673668 3.880763 165 W A 2 -0.12000 -0.12000 "TRP " " CB " "    " 6 0 0 0 A0A0A0  C2207  0 <> 1 0 0 0 0 0 0 <> <> 0 2210 <> 0 0 1 <> <> <> <> <>
  2211 2 48.404577 62.807138 4.358207 165 W A 2 0.07500 0.07500 "TRP " " CG " "    " 6 0 0 0 A0A0A0  C2208  0 <> 1 0 0 0 0 0 0 <> <> 0 2211 <> 0 0 1 <> <> <> <> <>
  2212 2 49.608162 62.747845 5.184896 165 W A 2 -0.05500 -0.05500 "TRP " " CD2" "    " 6 0 0 0 A0A0A0  C2209  0 <> 1 0 0 0 0 0 0 <> <> 0 2212 <> 0 0 1 <> <> <> <> <>
  2213 2 50.068920 64.081227 5.410097 165 W A 2 0.13000 0.13000 "TRP " " CE2" "    " 6 0 0 0 A0A0A0  C2210  0 <> 1 0 0 0 0 0 0 <> <> 0 2213 <> 0 0 1 <> <> <> <> <>
  2214 2 50.358253 61.702242 5.774950 165 W A 2 -0.11500 -0.11500 "TRP " " CE3" "    " 6 0 0 0 A0A0A0  C2211  0 <> 1 0 0 0 0 0 0 <> <> 0 2214 <> 0 0 1 <> <> <> <> <>
  2215 2 48.199702 64.117910 4.102698 165 W A 2 -0.11500 -0.11500 "TRP " " CD1" "    " 6 0 0 0 A0A0A0  C2212  0 <> 1 0 0 0 0 0 0 <> <> 0 2215 <> 0 0 1 <> <> <> <> <>
  2216 25 49.187122 64.871068 4.705674 165 W A 43 -0.57000 -0.57000 "TRP " " NE1" "    " 7 0 0 0 5757FF  N2213  0 <> 1 0 0 0 0 0 0 <> <> 0 2216 <> 0 0 1 <> <> <> <> <>
  2217 2 51.198407 64.363430 6.196754 165 W A 2 -0.11500 -0.11500 "TRP " " CZ2" "    " 6 0 0 0 A0A0A0  C2214  0 <> 1 0 0 0 0 0 0 <> <> 0 2217 <> 0 0 1 <> <> <> <> <>
  2218 2 51.500060 61.971594 6.556806 165 W A 2 -0.11500 -0.11500 "TRP " " CZ3" "    " 6 0 0 0 A0A0A0  C2215  0 <> 1 0 0 0 0 0 0 <> <> 0 2218 <> 0 0 1 <> <> <> <> <>
  2219 2 51.917064 63.299238 6.772196 165 W A 2 -0.11500 -0.11500 "TRP " " CH2" "    " 6 0 0 0 A0A0A0  C2216  0 <> 1 0 0 0 0 0 0 <> <> 0 2219 <> 0 0 1 <> <> <> <> <>
  2220 43 46.870169 59.228657 3.594924 165 W A 21 0.30000 0.30000 "TRP " " H  " "    " 1 0 0 0 FFFFFF  H2217  0 <> 1 0 0 0 0 0 0 <> <> 0 2220 <> 0 0 1 <> <> <> <> <>
  2221 41 47.545309 60.821270 5.861532 165 W A 21 0.06000 0.06000 "TRP " " HA " "    " 1 0 0 0 FFFFFF  H2218  0 <> 1 0 0 0 0 0 0 <> <> 0 2221 <> 0 0 1 <> <> <> <> <>
  2222 41 48.196545 61.032918 3.283673 165 W A 21 0.06000 0.06000 "TRP " "1HB " "    " 1 0 0 0 FFFFFF  H2219  0 <> 1 0 0 0 0 0 0 <> <> 0 2222 <> 0 0 1 <> <> <> <> <>
  2223 41 46.787824 62.061001 3.199432 165 W A 21 0.06000 0.06000 "TRP " "2HB " "    " 1 0 0 0 FFFFFF  H2220  0 <> 1 0 0 0 0 0 0 <> <> 0 2223 <> 0 0 1 <> <> <> <> <>
  2224 41 50.053326 60.678621 5.617490 165 W A 21 0.11500 0.11500 "TRP " " HE3" "    " 1 0 0 0 FFFFFF  H2221  0 <> 1 0 0 0 0 0 0 <> <> 0 2224 <> 0 0 1 <> <> <> <> <>
  2225 41 47.383229 64.506972 3.514070 165 W A 21 0.11500 0.11500 "TRP " " HD1" "    " 1 0 0 0 FFFFFF  H2222  0 <> 1 0 0 0 0 0 0 <> <> 0 2225 <> 0 0 1 <> <> <> <> <>
  2226 43 49.258747 65.883059 4.579839 165 W A 21 0.42000 0.42000 "TRP " " HE1" "    " 1 0 0 0 FFFFFF  H2223  0 <> 1 0 0 0 0 0 0 <> <> 0 2226 <> 0 0 1 <> <> <> <> <>
  2227 41 51.513769 65.386800 6.345144 165 W A 21 0.11500 0.11500 "TRP " " HZ2" "    " 1 0 0 0 FFFFFF  H2224  0 <> 1 0 0 0 0 0 0 <> <> 0 2227 <> 0 0 1 <> <> <> <> <>
  2228 41 52.060577 61.156468 6.991424 165 W A 21 0.11500 0.11500 "TRP " " HZ3" "    " 1 0 0 0 FFFFFF  H2225  0 <> 1 0 0 0 0 0 0 <> <> 0 2228 <> 0 0 1 <> <> <> <> <>
  2229 41 52.794976 63.497824 7.369150 165 W A 21 0.11500 0.11500 "TRP " " HH2" "    " 1 0 0 0 FFFFFF  H2226  0 <> 1 0 0 0 0 0 0 <> <> 0 2229 <> 0 0 1 <> <> <> <> <>
  2230 25 44.433221 61.118819 4.841283 166 V A 43 -0.50000 -0.50000 "VAL " " N  " "    " 7 0 0 0 5757FF  N2227  0 <> 1 0 0 0 0 0 0 <> <> 0 2230 <> 0 0 1 <> <> <> <> <>
  2231 3 43.081307 61.565565 5.137735 166 V A 2 0.14000 0.14000 "VAL " " CA " "    " 6 0 0 0 A0A0A0  C2228  0 <> 1 0 0 0 0 0 0 <> <> 0 2231 <> 0 0 1 <> <> <> <> <>
  2232 2 42.132072 60.355786 5.185609 166 V A 2 0.50000 0.50000 "VAL " " C  " "    " 6 0 0 0 A0A0A0  C2229  0 <> 1 0 0 0 0 0 0 <> <> 0 2232 <> 0 0 1 <> <> <> <> <>
  2233 15 42.524773 59.219595 4.914635 166 V A 70 -0.50000 -0.50000 "VAL " " O  " "    " 8 0 0 0 FF2F2F  O2230  0 <> 1 0 0 0 0 0 0 <> <> 0 2233 <> 0 0 1 <> <> <> <> <>
  2234 3 42.669436 62.659880 4.111124 166 V A 2 -0.06000 -0.06000 "VAL " " CB " "    " 6 0 0 0 A0A0A0  C2231  0 <> 1 0 0 0 0 0 0 <> <> 0 2234 <> 0 0 1 <> <> <> <> <>
  2235 3 43.598237 63.879052 4.180806 166 V A 2 -0.18000 -0.18000 "VAL " " CG1" "    " 6 0 0 0 A0A0A0  C2232  0 <> 1 0 0 0 0 0 0 <> <> 0 2235 <> 0 0 1 <> <> <> <> <>
  2236 3 42.614826 62.162922 2.652405 166 V A 2 -0.18000 -0.18000 "VAL " " CG2" "    " 6 0 0 0 A0A0A0  C2233  0 <> 1 0 0 0 0 0 0 <> <> 0 2236 <> 0 0 1 <> <> <> <> <>
  2237 43 44.486854 60.378094 4.146462 166 V A 21 0.30000 0.30000 "VAL " " H  " "    " 1 0 0 0 FFFFFF  H2234  0 <> 1 0 0 0 0 0 0 <> <> 0 2237 <> 0 0 1 <> <> <> <> <>
  2238 41 43.053577 62.000150 6.139350 166 V A 21 0.06000 0.06000 "VAL " " HA " "    " 1 0 0 0 FFFFFF  H2235  0 <> 1 0 0 0 0 0 0 <> <> 0 2238 <> 0 0 1 <> <> <> <> <>
  2239 41 41.666962 63.002415 4.372428 166 V A 21 0.06000 0.06000 "VAL " " HB " "    " 1 0 0 0 FFFFFF  H2236  0 <> 1 0 0 0 0 0 0 <> <> 0 2239 <> 0 0 1 <> <> <> <> <>
  2240 41 43.166178 64.723189 3.646634 166 V A 21 0.06000 0.06000 "VAL " "1HG1" "    " 1 0 0 0 FFFFFF  H2237  0 <> 1 0 0 0 0 0 0 <> <> 0 2240 <> 0 0 1 <> <> <> <> <>
  2241 41 43.798588 64.196412 5.202573 166 V A 21 0.06000 0.06000 "VAL " "2HG1" "    " 1 0 0 0 FFFFFF  H2238  0 <> 1 0 0 0 0 0 0 <> <> 0 2241 <> 0 0 1 <> <> <> <> <>
  2242 41 44.562601 63.653127 3.727499 166 V A 21 0.06000 0.06000 "VAL " "3HG1" "    " 1 0 0 0 FFFFFF  H2239  0 <> 1 0 0 0 0 0 0 <> <> 0 2242 <> 0 0 1 <> <> <> <> <>
  2243 41 42.239608 62.942313 1.990226 166 V A 21 0.06000 0.06000 "VAL " "1HG2" "    " 1 0 0 0 FFFFFF  H2240  0 <> 1 0 0 0 0 0 0 <> <> 0 2243 <> 0 0 1 <> <> <> <> <>
  2244 41 43.604956 61.887480 2.290696 166 V A 21 0.06000 0.06000 "VAL " "2HG2" "    " 1 0 0 0 FFFFFF  H2241  0 <> 1 0 0 0 0 0 0 <> <> 0 2244 <> 0 0 1 <> <> <> <> <>
  2245 41 41.971277 61.294000 2.531977 166 V A 21 0.06000 0.06000 "VAL " "3HG2" "    " 1 0 0 0 FFFFFF  H2242  0 <> 1 0 0 0 0 0 0 <> <> 0 2245 <> 0 0 1 <> <> <> <> <>
  2246 25 40.852335 60.617016 5.465909 167 M A 43 -0.50000 -0.50000 "MET " " N  " "    " 7 0 0 1 5757FF  N2243  0 <> 1 0 0 0 0 0 0 <> <> 0 2246 <> 0 0 1 <> <> <> <> <>
  2247 3 39.749566 59.789690 4.989285 167 M A 2 0.14000 0.14000 "MET " " CA " "    " 6 0 0 1 A0A0A0  C2244  0 <> 1 0 0 0 0 0 0 <> <> 0 2247 <> 0 0 1 <> <> <> <> <>
  2248 2 39.328579 60.485581 3.678188 167 M A 2 0.50000 0.50000 "MET " " C  " "    " 6 0 0 1 A0A0A0  C2245  0 <> 1 0 0 0 0 0 0 <> <> 0 2248 <> 0 0 1 <> <> <> <> <>
  2249 15 38.941843 61.656556 3.736375 167 M A 70 -0.50000 -0.50000 "MET " " O  " "    " 8 0 0 1 FF2F2F  O2246  0 <> 1 0 0 0 0 0 0 <> <> 0 2249 <> 0 0 1 <> <> <> <> <>
  2250 3 38.606108 59.864386 6.017929 167 M A 2 -0.12000 -0.12000 "MET " " CB " "    " 6 0 0 1 A0A0A0  C2247  0 <> 1 0 0 0 0 0 0 <> <> 0 2250 <> 0 0 1 <> <> <> <> <>
  2251 3 37.534731 58.780268 5.811892 167 M A 2 0.04750 0.04750 "MET " " CG " "    " 6 0 0 1 A0A0A0  C2248  0 <> 1 0 0 0 0 0 0 <> <> 0 2251 <> 0 0 1 <> <> <> <> <>
  2252 49 36.089111 58.943811 6.893148 167 M A 13 -0.33500 -0.33500 "MET " " SD " "    " 16 0 0 1 E1E11E  S2249  0 <> 1 0 0 0 0 0 0 <> <> 0 2252 <> 0 0 1 <> <> <> <> <>
  2253 3 36.884384 58.894626 8.525528 167 M A 2 -0.01250 -0.01250 "MET " " CE " "    " 6 0 0 1 A0A0A0  C2250  0 <> 1 0 0 0 0 0 0 <> <> 0 2253 <> 0 0 1 <> <> <> <> <>
  2254 43 40.607886 61.580053 5.647416 167 M A 21 0.30000 0.30000 "MET " " H  " "    " 1 0 0 1 FFFFFF  H2251  0 <> 1 0 0 0 0 0 0 <> <> 0 2254 <> 0 0 1 <> <> <> <> <>
  2255 41 40.057414 58.752203 4.857942 167 M A 21 0.06000 0.06000 "MET " " HA " "    " 1 0 0 0 FFFFFF  H2252  0 <> 1 0 0 0 0 0 0 <> <> 0 2255 <> 0 0 1 <> <> <> <> <>
  2256 41 39.043951 59.733225 7.006679 167 M A 21 0.06000 0.06000 "MET " "1HB " "    " 1 0 0 0 FFFFFF  H2253  0 <> 1 0 0 0 0 0 0 <> <> 0 2256 <> 0 0 1 <> <> <> <> <>
  2257 41 38.142357 60.851835 6.028856 167 M A 21 0.06000 0.06000 "MET " "2HB " "    " 1 0 0 0 FFFFFF  H2254  0 <> 1 0 0 0 0 0 0 <> <> 0 2257 <> 0 0 1 <> <> <> <> <>
  2258 41 37.170507 58.802525 4.783420 167 M A 21 0.06000 0.06000 "MET " "1HG " "    " 1 0 0 0 FFFFFF  H2255  0 <> 1 0 0 0 0 0 0 <> <> 0 2258 <> 0 0 1 <> <> <> <> <>
  2259 41 37.969680 57.790953 5.963522 167 M A 21 0.06000 0.06000 "MET " "2HG " "    " 1 0 0 0 FFFFFF  H2256  0 <> 1 0 0 0 0 0 0 <> <> 0 2259 <> 0 0 1 <> <> <> <> <>
  2260 41 36.146077 59.009483 9.316054 167 M A 21 0.06000 0.06000 "MET " "1HE " "    " 1 0 0 0 FFFFFF  H2257  0 <> 1 0 0 0 0 0 0 <> <> 0 2260 <> 0 0 1 <> <> <> <> <>
  2261 41 37.410699 57.952844 8.667802 167 M A 21 0.06000 0.06000 "MET " "2HE " "    " 1 0 0 0 FFFFFF  H2258  0 <> 1 0 0 0 0 0 0 <> <> 0 2261 <> 0 0 1 <> <> <> <> <>
  2262 41 37.596142 59.708396 8.647097 167 M A 21 0.06000 0.06000 "MET " "3HE " "    " 1 0 0 0 FFFFFF  H2259  0 <> 1 0 0 0 0 0 0 <> <> 0 2262 <> 0 0 1 <> <> <> <> <>
  2263 25 39.495049 59.852505 2.500384 168 P A 43 -0.14000 -0.14000 "PRO " " N  " "    " 7 0 0 0 5757FF  N2260  0 <> 1 0 0 0 0 0 0 <> <> 0 2263 <> 0 0 1 <> <> <> <> <>
  2264 3 39.370912 60.552243 1.217215 168 P A 2 0.01000 0.01000 "PRO " " CA " "    " 6 0 0 0 A0A0A0  C2261  0 <> 1 0 0 0 0 0 0 <> <> 0 2264 <> 0 0 1 <> <> <> <> <>
  2265 2 37.907005 60.750565 0.794591 168 P A 2 0.50000 0.50000 "PRO " " C  " "    " 6 0 0 0 A0A0A0  C2262  0 <> 1 0 0 0 0 0 0 <> <> 0 2265 <> 0 0 1 <> <> <> <> <>
  2266 15 36.999923 60.184163 1.402869 168 P A 70 -0.50000 -0.50000 "PRO " " O  " "    " 8 0 0 0 FF2F2F  O2263  0 <> 1 0 0 0 0 0 0 <> <> 0 2266 <> 0 0 1 <> <> <> <> <>
  2267 3 39.898868 58.457546 2.306642 168 P A 2 -0.05000 -0.05000 "PRO " " CD " "    " 6 0 0 0 A0A0A0  C2264  0 <> 1 0 0 0 0 0 0 <> <> 0 2267 <> 0 0 1 <> <> <> <> <>
  2268 3 40.112067 59.637644 0.226916 168 P A 2 -0.12000 -0.12000 "PRO " " CB " "    " 6 0 0 0 A0A0A0  C2265  0 <> 1 0 0 0 0 0 0 <> <> 0 2268 <> 0 0 1 <> <> <> <> <>
  2269 3 39.899913 58.241554 0.791077 168 P A 2 -0.12000 -0.12000 "PRO " " CG " "    " 6 0 0 0 A0A0A0  C2266  0 <> 1 0 0 0 0 0 0 <> <> 0 2269 <> 0 0 1 <> <> <> <> <>
  2270 41 40.901532 58.312230 2.712027 168 P A 21 0.06000 0.06000 "PRO " "1HD " "    " 1 0 0 0 FFFFFF  H2267  0 <> 1 0 0 0 0 0 0 <> <> 0 2270 <> 0 0 1 <> <> <> <> <>
  2271 41 39.216661 57.766051 2.804270 168 P A 21 0.06000 0.06000 "PRO " "2HD " "    " 1 0 0 0 FFFFFF  H2268  0 <> 1 0 0 0 0 0 0 <> <> 0 2271 <> 0 0 1 <> <> <> <> <>
  2272 41 39.859657 61.523243 1.277277 168 P A 21 0.06000 0.06000 "PRO " " HA " "    " 1 0 0 0 FFFFFF  H2269  0 <> 1 0 0 0 0 0 0 <> <> 0 2272 <> 0 0 1 <> <> <> <> <>
  2273 41 39.764124 59.728624 -0.803366 168 P A 21 0.06000 0.06000 "PRO " "1HB " "    " 1 0 0 0 FFFFFF  H2270  0 <> 1 0 0 0 0 0 0 <> <> 0 2273 <> 0 0 1 <> <> <> <> <>
  2274 41 41.172962 59.885866 0.230884 168 P A 21 0.06000 0.06000 "PRO " "2HB " "    " 1 0 0 0 FFFFFF  H2271  0 <> 1 0 0 0 0 0 0 <> <> 0 2274 <> 0 0 1 <> <> <> <> <>
  2275 41 40.637254 57.514657 0.453659 168 P A 21 0.06000 0.06000 "PRO " "1HG " "    " 1 0 0 0 FFFFFF  H2272  0 <> 1 0 0 0 0 0 0 <> <> 0 2275 <> 0 0 1 <> <> <> <> <>
  2276 41 38.918098 57.884756 0.474895 168 P A 21 0.06000 0.06000 "PRO " "2HG " "    " 1 0 0 0 FFFFFF  H2273  0 <> 1 0 0 0 0 0 0 <> <> 0 2276 <> 0 0 1 <> <> <> <> <>
  2277 25 37.704594 61.525934 -0.275446 169 D A 43 -0.50000 -0.50000 "ASP " " N  " "    " 7 0 0 0 5757FF  N2274  0 <> 1 0 0 0 0 0 0 <> <> 0 2277 <> 0 0 1 <> <> <> <> <>
  2278 3 36.505534 61.480672 -1.111361 169 D A 2 0.14000 0.14000 "ASP " " CA " "    " 6 0 0 0 A0A0A0  C2275  0 <> 1 0 0 0 0 0 0 <> <> 0 2278 <> 0 0 1 <> <> <> <> <>
  2279 2 36.652487 60.308712 -2.101002 169 D A 2 0.50000 0.50000 "ASP " " C  " "    " 6 0 0 0 A0A0A0  C2276  0 <> 1 0 0 0 0 0 0 <> <> 0 2279 <> 0 0 1 <> <> <> <> <>
  2280 15 37.758607 59.998685 -2.561460 169 D A 70 -0.50000 -0.50000 "ASP " " O  " "    " 8 0 0 0 FF2F2F  O2277  0 <> 1 0 0 0 0 0 0 <> <> 0 2280 <> 0 0 1 <> <> <> <> <>
  2281 3 36.363841 62.792272 -1.919905 169 D A 2 -0.22000 -0.22000 "ASP " " CB " "    " 6 0 0 0 A0A0A0  C2278  0 <> 1 0 0 0 0 0 0 <> <> 0 2281 <> 0 0 1 <> <> <> <> <>
  2282 2 35.123080 62.846727 -2.817482 169 D A 2 0.70000 0.70000 "ASP " " CG " "    " 6 0 0 0 A0A0A0  C2279  0 <> 1 0 0 0 0 0 0 <> <> 0 2282 <> 0 0 1 <> <> <> <> <>
  2283 18 34.165748 62.089244 -2.565478 169 D A 70 -0.80000 -0.80000 "ASP " " OD1" "    " 8 -1 0 0 FF2F2F  O2280  0 <> 1 0 0 0 0 0 0 <> <> 0 2283 <> 0 0 1 <> <> <> <> <>
  2284 15 35.143216 63.597672 -3.811890 169 D A 70 -0.80000 -0.80000 "ASP " " OD2" "    " 8 0 0 0 FF2F2F  O2281  0 <> 1 0 0 0 0 0 0 <> <> 0 2284 <> 0 0 1 <> <> <> <> <>
  2285 43 38.512372 62.004264 -0.663008 169 D A 21 0.30000 0.30000 "ASP " " H  " "    " 1 0 0 0 FFFFFF  H2282  0 <> 1 0 0 0 0 0 0 <> <> 0 2285 <> 0 0 1 <> <> <> <> <>
  2286 41 35.619321 61.341317 -0.492143 169 D A 21 0.06000 0.06000 "ASP " " HA " "    " 1 0 0 0 FFFFFF  H2283  0 <> 1 0 0 0 0 0 0 <> <> 0 2286 <> 0 0 1 <> <> <> <> <>
  2287 41 36.342902 63.650259 -1.254220 169 D A 21 0.06000 0.06000 "ASP " "1HB " "    " 1 0 0 0 FFFFFF  H2284  0 <> 1 0 0 0 0 0 0 <> <> 0 2287 <> 0 0 1 <> <> <> <> <>
  2288 41 37.235548 62.914835 -2.560196 169 D A 21 0.06000 0.06000 "ASP " "2HB " "    " 1 0 0 0 FFFFFF  H2285  0 <> 1 0 0 0 0 0 0 <> <> 0 2288 <> 0 0 1 <> <> <> <> <>
  2289 25 35.524631 59.700623 -2.453900 170 E A 43 -0.50000 -0.50000 "GLU " " N  " "    " 7 0 0 0 5757FF  N2286  0 <> 1 0 0 0 0 0 0 <> <> 0 2289 <> 0 0 1 <> <> <> <> <>
  2290 3 35.387493 58.626967 -3.422668 170 E A 2 0.14000 0.14000 "GLU " " CA " "    " 6 0 0 0 A0A0A0  C2287  0 <> 1 0 0 0 0 0 0 <> <> 0 2290 <> 0 0 1 <> <> <> <> <>
  2291 2 34.705296 59.112839 -4.717684 170 E A 2 0.50000 0.50000 "GLU " " C  " "    " 6 0 0 0 A0A0A0  C2288  0 <> 1 0 0 0 0 0 0 <> <> 0 2291 <> 0 0 1 <> <> <> <> <>
  2292 15 34.667119 58.347969 -5.682138 170 E A 70 -0.50000 -0.50000 "GLU " " O  " "    " 8 0 0 0 FF2F2F  O2289  0 <> 1 0 0 0 0 0 0 <> <> 0 2292 <> 0 0 1 <> <> <> <> <>
  2293 3 34.552945 57.504768 -2.773877 170 E A 2 -0.12000 -0.12000 "GLU " " CB " "    " 6 0 0 0 A0A0A0  C2290  0 <> 1 0 0 0 0 0 0 <> <> 0 2293 <> 0 0 1 <> <> <> <> <>
  2294 3 35.196009 56.947266 -1.483037 170 E A 2 -0.22000 -0.22000 "GLU " " CG " "    " 6 0 0 0 A0A0A0  C2291  0 <> 1 0 0 0 0 0 0 <> <> 0 2294 <> 0 0 1 <> <> <> <> <>
  2295 2 34.583530 55.628688 -1.039326 170 E A 2 0.70000 0.70000 "GLU " " CD " "    " 6 0 0 0 A0A0A0  C2292  0 <> 1 0 0 0 0 0 0 <> <> 0 2295 <> 0 0 1 <> <> <> <> <>
  2296 18 34.372346 54.765704 -1.920906 170 E A 70 -0.80000 -0.80000 "GLU " " OE1" "    " 8 -1 0 0 FF2F2F  O2293  0 <> 1 0 0 0 0 0 0 <> <> 0 2296 <> 0 0 1 <> <> <> <> <>
  2297 15 34.335208 55.472440 0.176059 170 E A 70 -0.80000 -0.80000 "GLU " " OE2" "    " 8 0 0 0 FF2F2F  O2294  0 <> 1 0 0 0 0 0 0 <> <> 0 2297 <> 0 0 1 <> <> <> <> <>
  2298 43 34.671410 60.182220 -2.173403 170 E A 21 0.30000 0.30000 "GLU " " H  " "    " 1 0 0 0 FFFFFF  H2295  0 <> 1 0 0 0 0 0 0 <> <> 0 2298 <> 0 0 1 <> <> <> <> <>
  2299 41 36.362675 58.223418 -3.700021 170 E A 21 0.06000 0.06000 "GLU " " HA " "    " 1 0 0 0 FFFFFF  H2296  0 <> 1 0 0 0 0 0 0 <> <> 0 2299 <> 0 0 1 <> <> <> <> <>
  2300 41 33.547916 57.859299 -2.538073 170 E A 21 0.06000 0.06000 "GLU " "1HB " "    " 1 0 0 0 FFFFFF  H2297  0 <> 1 0 0 0 0 0 0 <> <> 0 2300 <> 0 0 1 <> <> <> <> <>
  2301 41 34.421366 56.704382 -3.502135 170 E A 21 0.06000 0.06000 "GLU " "2HB " "    " 1 0 0 0 FFFFFF  H2298  0 <> 1 0 0 0 0 0 0 <> <> 0 2301 <> 0 0 1 <> <> <> <> <>
  2302 41 36.257868 56.771841 -1.644802 170 E A 21 0.06000 0.06000 "GLU " "1HG " "    " 1 0 0 0 FFFFFF  H2299  0 <> 1 0 0 0 0 0 0 <> <> 0 2302 <> 0 0 1 <> <> <> <> <>
  2303 41 35.112959 57.669677 -0.670733 170 E A 21 0.06000 0.06000 "GLU " "2HG " "    " 1 0 0 0 FFFFFF  H2300  0 <> 1 0 0 0 0 0 0 <> <> 0 2303 <> 0 0 1 <> <> <> <> <>
  2304 25 34.154287 60.337294 -4.762028 171 A A 43 -0.50000 -0.50000 "ALA " " N  " "    " 7 0 0 0 5757FF  N2301  0 <> 1 0 0 0 0 0 0 <> <> 0 2304 <> 0 0 1 <> <> <> <> <>
  2305 3 33.382144 60.850019 -5.892536 171 A A 2 0.14000 0.14000 "ALA " " CA " "    " 6 0 0 0 A0A0A0  C2302  0 <> 1 0 0 0 0 0 0 <> <> 0 2305 <> 0 0 1 <> <> <> <> <>
  2306 2 34.258469 61.647845 -6.867897 171 A A 2 0.50000 0.50000 "ALA " " C  " "    " 6 0 0 0 A0A0A0  C2303  0 <> 1 0 0 0 0 0 0 <> <> 0 2306 <> 0 0 1 <> <> <> <> <>
  2307 15 34.318803 61.323059 -8.052091 171 A A 70 -0.50000 -0.50000 "ALA " " O  " "    " 8 0 0 0 FF2F2F  O2304  0 <> 1 0 0 0 0 0 0 <> <> 0 2307 <> 0 0 1 <> <> <> <> <>
  2308 3 32.308468 61.808510 -5.355247 171 A A 2 -0.18000 -0.18000 "ALA " " CB " "    " 6 0 0 0 A0A0A0  C2305  0 <> 1 0 0 0 0 0 0 <> <> 0 2308 <> 0 0 1 <> <> <> <> <>
  2309 43 34.189050 60.939539 -3.931481 171 A A 21 0.30000 0.30000 "ALA " " H  " "    " 1 0 0 0 FFFFFF  H2306  0 <> 1 0 0 0 0 0 0 <> <> 0 2309 <> 0 0 1 <> <> <> <> <>
  2310 41 32.895202 60.036843 -6.434411 171 A A 21 0.06000 0.06000 "ALA " " HA " "    " 1 0 0 0 FFFFFF  H2307  0 <> 1 0 0 0 0 0 0 <> <> 0 2310 <> 0 0 1 <> <> <> <> <>
  2311 41 31.679990 62.173735 -6.164112 171 A A 21 0.06000 0.06000 "ALA " "1HB " "    " 1 0 0 0 FFFFFF  H2308  0 <> 1 0 0 0 0 0 0 <> <> 0 2311 <> 0 0 1 <> <> <> <> <>
  2312 41 31.661940 61.317493 -4.631214 171 A A 21 0.06000 0.06000 "ALA " "2HB " "    " 1 0 0 0 FFFFFF  H2309  0 <> 1 0 0 0 0 0 0 <> <> 0 2312 <> 0 0 1 <> <> <> <> <>
  2313 41 32.738842 62.676215 -4.857066 171 A A 21 0.06000 0.06000 "ALA " "3HB " "    " 1 0 0 0 FFFFFF  H2310  0 <> 1 0 0 0 0 0 0 <> <> 0 2313 <> 0 0 1 <> <> <> <> <>
  2314 25 34.924301 62.708324 -6.393332 172 N A 43 -0.50000 -0.50000 "ASN " " N  " "    " 7 0 0 0 5757FF  N2311  0 <> 1 0 0 0 0 0 0 <> <> 0 2314 <> 0 0 1 <> <> <> <> <>
  2315 3 35.627005 63.684237 -7.235898 172 N A 2 0.14000 0.14000 "ASN " " CA " "    " 6 0 0 0 A0A0A0  C2312  0 <> 1 0 0 0 0 0 0 <> <> 0 2315 <> 0 0 1 <> <> <> <> <>
  2316 2 37.074353 63.251847 -7.486343 172 N A 2 0.50000 0.50000 "ASN " " C  " "    " 6 0 0 0 A0A0A0  C2313  0 <> 1 0 0 0 0 0 0 <> <> 0 2316 <> 0 0 1 <> <> <> <> <>
  2317 15 37.769309 63.826074 -8.324355 172 N A 70 -0.50000 -0.50000 "ASN " " O  " "    " 8 0 0 0 FF2F2F  O2314  0 <> 1 0 0 0 0 0 0 <> <> 0 2317 <> 0 0 1 <> <> <> <> <>
  2318 3 35.706395 65.054946 -6.525498 172 N A 2 -0.12000 -0.12000 "ASN " " CB " "    " 6 0 0 0 A0A0A0  C2315  0 <> 1 0 0 0 0 0 0 <> <> 0 2318 <> 0 0 1 <> <> <> <> <>
  2319 2 34.346263 65.712496 -6.343337 172 N A 2 0.50000 0.50000 "ASN " " CG " "    " 6 0 0 0 A0A0A0  C2316  0 <> 1 0 0 0 0 0 0 <> <> 0 2319 <> 0 0 1 <> <> <> <> <>
  2320 15 33.876807 66.422917 -7.223452 172 N A 70 -0.50000 -0.50000 "ASN " " OD1" "    " 8 0 0 0 FF2F2F  O2317  0 <> 1 0 0 0 0 0 0 <> <> 0 2320 <> 0 0 1 <> <> <> <> <>
  2321 25 33.707599 65.482390 -5.206676 172 N A 43 -0.76000 -0.76000 "ASN " " ND2" "    " 7 0 0 0 5757FF  N2318  0 <> 1 0 0 0 0 0 0 <> <> 0 2321 <> 0 0 1 <> <> <> <> <>
  2322 43 34.864825 62.923276 -5.388770 172 N A 21 0.30000 0.30000 "ASN " " H  " "    " 1 0 0 0 FFFFFF  H2319  0 <> 1 0 0 0 0 0 0 <> <> 0 2322 <> 0 0 1 <> <> <> <> <>
  2323 41 35.115591 63.796288 -8.193962 172 N A 21 0.06000 0.06000 "ASN " " HA " "    " 1 0 0 0 FFFFFF  H2320  0 <> 1 0 0 0 0 0 0 <> <> 0 2323 <> 0 0 1 <> <> <> <> <>
  2324 41 36.215378 64.980426 -5.565535 172 N A 21 0.06000 0.06000 "ASN " "1HB " "    " 1 0 0 0 FFFFFF  H2321  0 <> 1 0 0 0 0 0 0 <> <> 0 2324 <> 0 0 1 <> <> <> <> <>
  2325 41 36.305359 65.753524 -7.107010 172 N A 21 0.06000 0.06000 "ASN " "2HB " "    " 1 0 0 0 FFFFFF  H2322  0 <> 1 0 0 0 0 0 0 <> <> 0 2325 <> 0 0 1 <> <> <> <> <>
  2326 43 32.848046 65.977935 -5.012085 172 N A 21 0.38000 0.38000 "ASN " "1HD2" "    " 1 0 0 0 FFFFFF  H2323  0 <> 1 0 0 0 0 0 0 <> <> 0 2326 <> 0 0 1 <> <> <> <> <>
  2327 43 34.137086 64.825478 -4.534906 172 N A 21 0.38000 0.38000 "ASN " "2HD2" "    " 1 0 0 0 FFFFFF  H2324  0 <> 1 0 0 0 0 0 0 <> <> 0 2327 <> 0 0 1 <> <> <> <> <>
  2328 25 37.559833 62.243313 -6.772113 173 S A 43 -0.50000 -0.50000 "SER " " N  " "    " 7 0 0 0 5757FF  N2325  0 <> 1 0 0 0 0 0 0 <> <> 0 2328 <> 0 0 1 <> <> <> <> <>
  2329 3 38.899514 61.703487 -6.865541 173 S A 2 0.14000 0.14000 "SER " " CA " "    " 6 0 0 0 A0A0A0  C2326  0 <> 1 0 0 0 0 0 0 <> <> 0 2329 <> 0 0 1 <> <> <> <> <>
  2330 2 39.060752 60.831437 -8.129045 173 S A 2 0.50000 0.50000 "SER " " C  " "    " 6 0 0 0 A0A0A0  C2327  0 <> 1 0 0 0 0 0 0 <> <> 0 2330 <> 0 0 1 <> <> <> <> <>
  2331 15 38.170856 60.073910 -8.505708 173 S A 70 -0.50000 -0.50000 "SER " " O  " "    " 8 0 0 0 FF2F2F  O2328  0 <> 1 0 0 0 0 0 0 <> <> 0 2331 <> 0 0 1 <> <> <> <> <>
  2332 3 39.100933 60.905835 -5.559234 173 S A 2 0.14500 0.14500 "SER " " CB " "    " 6 0 0 0 A0A0A0  C2329  0 <> 1 0 0 0 0 0 0 <> <> 0 2332 <> 0 0 1 <> <> <> <> <>
  2333 16 38.055729 59.982239 -5.307579 173 S A 70 -0.68300 -0.68300 "SER " " OG " "    " 8 0 0 0 FF2F2F  O2330  0 <> 1 0 0 0 0 0 0 <> <> 0 2333 <> 0 0 1 <> <> <> <> <>
  2334 43 36.918910 61.744729 -6.166040 173 S A 21 0.30000 0.30000 "SER " " H  " "    " 1 0 0 0 FFFFFF  H2331  0 <> 1 0 0 0 0 0 0 <> <> 0 2334 <> 0 0 1 <> <> <> <> <>
  2335 41 39.627158 62.515318 -6.906007 173 S A 21 0.06000 0.06000 "SER " " HA " "    " 1 0 0 0 FFFFFF  H2332  0 <> 1 0 0 0 0 0 0 <> <> 0 2335 <> 0 0 1 <> <> <> <> <>
  2336 41 40.042239 60.366541 -5.576649 173 S A 21 0.06000 0.06000 "SER " "1HB " "    " 1 0 0 0 FFFFFF  H2333  0 <> 1 0 0 0 0 0 0 <> <> 0 2336 <> 0 0 1 <> <> <> <> <>
  2337 41 39.152735 61.596320 -4.715292 173 S A 21 0.06000 0.06000 "SER " "2HB " "    " 1 0 0 0 FFFFFF  H2334  0 <> 1 0 0 0 0 0 0 <> <> 0 2337 <> 0 0 1 <> <> <> <> <>
  2338 42 37.944985 59.906147 -4.356474 173 S A 21 0.41800 0.41800 "SER " " HG " "    " 1 0 0 0 FFFFFF  H2335  0 <> 1 0 0 0 0 0 0 <> <> 0 2338 <> 0 0 1 <> <> <> <> <>
  2339 25 40.218534 60.913175 -8.789892 174 H A 43 -0.50000 -0.50000 "HIS " " N  " "    " 7 0 0 0 5757FF  N2336  0 <> 1 0 0 0 0 0 0 <> <> 0 2339 <> 0 0 1 <> <> <> <> <>
  2340 3 40.734470 59.880369 -9.685545 174 H A 2 0.14000 0.14000 "HIS " " CA " "    " 6 0 0 0 A0A0A0  C2337  0 <> 1 0 0 0 0 0 0 <> <> 0 2340 <> 0 0 1 <> <> <> <> <>
  2341 2 41.364226 58.800189 -8.781753 174 H A 2 0.50000 0.50000 "HIS " " C  " "    " 6 0 0 0 A0A0A0  C2338  0 <> 1 0 0 0 0 0 0 <> <> 0 2341 <> 0 0 1 <> <> <> <> <>
  2342 15 41.788368 59.107567 -7.664207 174 H A 70 -0.50000 -0.50000 "HIS " " O  " "    " 8 0 0 0 FF2F2F  O2339  0 <> 1 0 0 0 0 0 0 <> <> 0 2342 <> 0 0 1 <> <> <> <> <>
  2343 3 41.810389 60.522275 -10.596021 174 H A 2 -0.00500 -0.00500 "HIS " " CB " "    " 6 0 0 0 A0A0A0  C2340  0 <> 1 0 0 0 0 0 0 <> <> 0 2343 <> 0 0 1 <> <> <> <> <>
  2344 2 42.558898 59.646779 -11.584047 174 H A 2 0.01500 0.01500 "HIS " " CG " "    " 6 0 0 0 A0A0A0  C2341  0 <> 1 0 0 0 0 0 0 <> <> 0 2344 <> 0 0 1 <> <> <> <> <>
  2345 2 43.864864 59.700652 -12.019466 174 H A 2 -0.01500 -0.01500 "HIS " " CD2" "    " 6 0 0 0 A0A0A0  C2342  0 <> 1 0 0 0 0 0 0 <> <> 0 2345 <> 0 0 1 <> <> <> <> <>
  2346 25 41.988266 58.616928 -12.313315 174 H A 43 -0.57000 -0.57000 "HIS " " ND1" "    " 7 0 0 0 5757FF  N2343  0 <> 1 0 0 0 0 0 0 <> <> 0 2346 <> 0 0 1 <> <> <> <> <>
  2347 2 42.921580 58.120816 -13.129633 174 H A 2 0.29500 0.29500 "HIS " " CE1" "    " 6 0 0 0 A0A0A0  C2344  0 <> 1 0 0 0 0 0 0 <> <> 0 2347 <> 0 0 1 <> <> <> <> <>
  2348 25 44.093882 58.734084 -13.000058 174 H A 43 -0.49000 -0.49000 "HIS " " NE2" "    " 7 0 0 0 5757FF  N2345  0 <> 1 0 0 0 0 0 0 <> <> 0 2348 <> 0 0 1 <> <> <> <> <>
  2349 43 40.925239 61.560098 -8.431285 174 H A 21 0.30000 0.30000 "HIS " " H  " "    " 1 0 0 0 FFFFFF  H2346  0 <> 1 0 0 0 0 0 0 <> <> 0 2349 <> 0 0 1 <> <> <> <> <>
  2350 41 39.922871 59.476668 -10.285285 174 H A 21 0.06000 0.06000 "HIS " " HA " "    " 1 0 0 0 FFFFFF  H2347  0 <> 1 0 0 0 0 0 0 <> <> 0 2350 <> 0 0 1 <> <> <> <> <>
  2351 41 41.347783 61.326808 -11.169077 174 H A 21 0.06000 0.06000 "HIS " "1HB " "    " 1 0 0 0 FFFFFF  H2348  0 <> 1 0 0 0 0 0 0 <> <> 0 2351 <> 0 0 1 <> <> <> <> <>
  2352 41 42.568621 61.002401 -9.979724 174 H A 21 0.06000 0.06000 "HIS " "2HB " "    " 1 0 0 0 FFFFFF  H2349  0 <> 1 0 0 0 0 0 0 <> <> 0 2352 <> 0 0 1 <> <> <> <> <>
  2353 41 44.653603 60.373399 -11.720279 174 H A 21 0.11500 0.11500 "HIS " " HD2" "    " 1 0 0 0 FFFFFF  H2350  0 <> 1 0 0 0 0 0 0 <> <> 0 2353 <> 0 0 1 <> <> <> <> <>
  2354 43 41.039219 58.239902 -12.228902 174 H A 21 0.42000 0.42000 "HIS " " HD1" "    " 1 0 0 0 FFFFFF  H2351  0 <> 1 0 0 0 0 0 0 <> <> 0 2354 <> 0 0 1 <> <> <> <> <>
  2355 41 42.744837 57.296325 -13.809674 174 H A 21 0.11500 0.11500 "HIS " " HE1" "    " 1 0 0 0 FFFFFF  H2352  0 <> 1 0 0 0 0 0 0 <> <> 0 2355 <> 0 0 1 <> <> <> <> <>
  2356 25 41.440398 57.535426 -9.224235 175 W A 43 -0.50000 -0.50000 "TRP " " N  " "    " 7 0 0 0 5757FF  N2353  1 <> 1 0 0 0 0 0 0 <> <> 0 2356 <> 0 0 1 <> <> <> <> <>
  2357 3 41.941809 56.394683 -8.439066 175 W A 2 0.14000 0.14000 "TRP " " CA " "    " 6 0 0 0 A0A0A0  C2354  1 <> 1 0 0 0 0 0 0 <> <> 0 2357 <> 0 0 1 <> <> <> <> <>
  2358 2 43.344489 56.619903 -7.839949 175 W A 2 0.50000 0.50000 "TRP " " C  " "    " 6 0 0 0 A0A0A0  C2355  1 <> 1 0 0 0 0 0 0 <> <> 0 2358 <> 0 0 1 <> <> <> <> <>
  2359 15 43.651840 56.137341 -6.750550 175 W A 70 -0.50000 -0.50000 "TRP " " O  " "    " 8 0 0 0 FF2F2F  O2356  1 <> 1 0 0 0 0 0 0 <> <> 0 2359 <> 0 0 1 <> <> <> <> <>
  2360 3 41.869701 55.085485 -9.256233 175 W A 2 -0.12000 -0.12000 "TRP " " CB " "    " 6 0 0 0 A0A0A0  C2357  1 <> 1 0 0 0 0 0 0 <> <> 0 2360 <> 0 0 1 <> <> <> <> <>
  2361 2 42.770961 54.923305 -10.448510 175 W A 2 0.07500 0.07500 "TRP " " CG " "    " 6 0 0 0 A0A0A0  C2358  1 <> 1 0 0 0 0 0 0 <> <> 0 2361 <> 0 0 1 <> <> <> <> <>
  2362 2 44.171144 54.495997 -10.499452 175 W A 2 -0.05500 -0.05500 "TRP " " CD2" "    " 6 0 0 0 A0A0A0  C2359  1 <> 1 0 0 0 0 0 0 <> <> 0 2362 <> 0 0 1 <> <> <> <> <>
  2363 2 44.578440 54.449697 -11.868346 175 W A 2 0.13000 0.13000 "TRP " " CE2" "    " 6 0 0 0 A0A0A0  C2360  1 <> 1 0 0 0 0 0 0 <> <> 0 2363 <> 0 0 1 <> <> <> <> <>
  2364 2 45.138509 54.119822 -9.535010 175 W A 2 -0.11500 -0.11500 "TRP " " CE3" "    " 6 0 0 0 A0A0A0  C2361  1 <> 1 0 0 0 0 0 0 <> <> 0 2364 <> 0 0 1 <> <> <> <> <>
  2365 2 42.390462 55.076720 -11.735392 175 W A 2 -0.11500 -0.11500 "TRP " " CD1" "    " 6 0 0 0 A0A0A0  C2362  1 <> 1 0 0 0 0 0 0 <> <> 0 2365 <> 0 0 1 <> <> <> <> <>
  2366 25 43.441609 54.771139 -12.572948 175 W A 43 -0.57000 -0.57000 "TRP " " NE1" "    " 7 0 0 0 5757FF  N2363  1 <> 1 0 0 0 0 0 0 <> <> 0 2366 <> 0 0 1 <> <> <> <> <>
  2367 2 45.880836 54.094209 -12.257031 175 W A 2 -0.11500 -0.11500 "TRP " " CZ2" "    " 6 0 0 0 A0A0A0  C2364  1 <> 1 0 0 0 0 0 0 <> <> 0 2367 <> 0 0 1 <> <> <> <> <>
  2368 2 46.440614 53.733188 -9.917655 175 W A 2 -0.11500 -0.11500 "TRP " " CZ3" "    " 6 0 0 0 A0A0A0  C2365  1 <> 1 0 0 0 0 0 0 <> <> 0 2368 <> 0 0 1 <> <> <> <> <>
  2369 2 46.813880 53.724767 -11.273806 175 W A 2 -0.11500 -0.11500 "TRP " " CH2" "    " 6 0 0 0 A0A0A0  C2366  1 <> 1 0 0 0 0 0 0 <> <> 0 2369 <> 0 0 1 <> <> <> <> <>
  2370 43 41.025353 57.336094 -10.131578 175 W A 21 0.30000 0.30000 "TRP " " H  " "    " 1 0 0 0 FFFFFF  H2367  1 <> 1 0 0 0 0 0 0 <> <> 0 2370 <> 0 0 1 <> <> <> <> <>
  2371 41 41.261120 56.289834 -7.591702 175 W A 21 0.06000 0.06000 "TRP " " HA " "    " 1 0 0 0 FFFFFF  H2368  1 <> 1 0 0 0 0 0 0 <> <> 0 2371 <> 0 0 1 <> <> <> <> <>
  2372 41 42.071348 54.237893 -8.602123 175 W A 21 0.06000 0.06000 "TRP " "1HB " "    " 1 0 0 0 FFFFFF  H2369  1 <> 1 0 0 0 0 0 0 <> <> 0 2372 <> 0 0 1 <> <> <> <> <>
  2373 41 40.842081 54.945568 -9.593818 175 W A 21 0.06000 0.06000 "TRP " "2HB " "    " 1 0 0 0 FFFFFF  H2370  1 <> 1 0 0 0 0 0 0 <> <> 0 2373 <> 0 0 1 <> <> <> <> <>
  2374 41 44.867329 54.116473 -8.489321 175 W A 21 0.11500 0.11500 "TRP " " HE3" "    " 1 0 0 0 FFFFFF  H2371  1 <> 1 0 0 0 0 0 0 <> <> 0 2374 <> 0 0 1 <> <> <> <> <>
  2375 41 41.394227 55.349503 -12.048837 175 W A 21 0.11500 0.11500 "TRP " " HD1" "    " 1 0 0 0 FFFFFF  H2372  1 <> 1 0 0 0 0 0 0 <> <> 0 2375 <> 0 0 1 <> <> <> <> <>
  2376 43 43.325211 54.649139 -13.578369 175 W A 21 0.42000 0.42000 "TRP " " HE1" "    " 1 0 0 0 FFFFFF  H2373  1 <> 1 0 0 0 0 0 0 <> <> 0 2376 <> 0 0 1 <> <> <> <> <>
  2377 41 46.150229 54.074901 -13.304518 175 W A 21 0.11500 0.11500 "TRP " " HZ2" "    " 1 0 0 0 FFFFFF  H2374  1 <> 1 0 0 0 0 0 0 <> <> 0 2377 <> 0 0 1 <> <> <> <> <>
  2378 41 47.158378 53.427119 -9.174561 175 W A 21 0.11500 0.11500 "TRP " " HZ3" "    " 1 0 0 0 FFFFFF  H2375  1 <> 1 0 0 0 0 0 0 <> <> 0 2378 <> 0 0 1 <> <> <> <> <>
  2379 41 47.805231 53.411154 -11.563285 175 W A 21 0.11500 0.11500 "TRP " " HH2" "    " 1 0 0 0 FFFFFF  H2376  1 <> 1 0 0 0 0 0 0 <> <> 0 2379 <> 0 0 1 <> <> <> <> <>
  2380 25 44.170232 57.420934 -8.523521 176 R A 43 -0.50000 -0.50000 "ARG " " N  " "    " 7 0 0 0 5757FF  N2377  1 <> 1 0 0 0 0 0 0 <> <> 0 2380 <> 0 0 1 <> <> <> <> <>
  2381 3 45.472685 57.874974 -8.057039 176 R A 2 0.14000 0.14000 "ARG " " CA " "    " 6 0 0 0 A0A0A0  C2378  1 <> 1 0 0 0 0 0 0 <> <> 0 2381 <> 0 0 1 <> <> <> <> <>
  2382 2 45.401964 58.831451 -6.862810 176 R A 2 0.50000 0.50000 "ARG " " C  " "    " 6 0 0 0 A0A0A0  C2379  1 <> 1 0 0 0 0 0 0 <> <> 0 2382 <> 0 0 1 <> <> <> <> <>
  2383 15 46.322013 58.800497 -6.056913 176 R A 70 -0.50000 -0.50000 "ARG " " O  " "    " 8 0 0 0 FF2F2F  O2380  1 <> 1 0 0 0 0 0 0 <> <> 0 2383 <> 0 0 1 <> <> <> <> <>
  2384 3 46.207411 58.574708 -9.206761 176 R A 2 -0.12000 -0.12000 "ARG " " CB " "    " 6 0 0 0 A0A0A0  C2381  1 <> 1 0 0 0 0 0 0 <> <> 0 2384 <> 0 0 1 <> <> <> <> <>
  2385 3 46.869471 57.554141 -10.137016 176 R A 2 -0.05000 -0.05000 "ARG " " CG " "    " 6 0 0 0 A0A0A0  C2382  1 <> 1 0 0 0 0 0 0 <> <> 0 2385 <> 0 0 1 <> <> <> <> <>
  2386 3 47.236470 58.105304 -11.509846 176 R A 2 0.19000 0.19000 "ARG " " CD " "    " 6 0 0 0 A0A0A0  C2383  1 <> 1 0 0 0 0 0 0 <> <> 0 2386 <> 0 0 1 <> <> <> <> <>
  2387 25 47.743156 59.493951 -11.491149 176 R A 43 -0.69997 -0.69997 "ARG " " NE " "    " 7 0 0 0 5757FF  N2384  1 <> 1 0 0 0 0 0 0 <> <> 0 2387 <> 0 0 1 <> <> <> <> <>
  2388 2 47.653776 60.327628 -12.536821 176 R A 2 0.63990 0.63990 "ARG " " CZ " "    " 6 0 0 0 A0A0A0  C2385  1 <> 1 0 0 0 0 0 0 <> <> 0 2388 <> 0 0 1 <> <> <> <> <>
  2389 25 46.890436 60.016375 -13.578054 176 R A 43 -0.79997 -0.79997 "ARG " " NH1" "    " 7 0 0 0 5757FF  N2386  1 <> 1 0 0 0 0 0 0 <> <> 0 2389 <> 0 0 1 <> <> <> <> <>
  2390 31 48.348984 61.466567 -12.566483 176 R A 43 -0.79997 -0.79997 "ARG " " NH2" "    " 7 1 0 0 5757FF  N2387  1 <> 1 0 0 0 0 0 0 <> <> 0 2390 <> 0 0 1 <> <> <> <> <>
  2391 43 43.819797 57.774787 -9.403376 176 R A 21 0.30000 0.30000 "ARG " " H  " "    " 1 0 0 0 FFFFFF  H2388  1 <> 1 0 0 0 0 0 0 <> <> 0 2391 <> 0 0 1 <> <> <> <> <>
  2392 41 46.049820 57.005092 -7.739686 176 R A 21 0.06000 0.06000 "ARG " " HA " "    " 1 0 0 0 FFFFFF  H2389  1 <> 1 0 0 0 0 0 0 <> <> 0 2392 <> 0 0 1 <> <> <> <> <>
  2393 41 45.513426 59.212105 -9.756320 176 R A 21 0.06000 0.06000 "ARG " "1HB " "    " 1 0 0 0 FFFFFF  H2390  1 <> 1 0 0 0 0 0 0 <> <> 0 2393 <> 0 0 1 <> <> <> <> <>
  2394 41 46.982021 59.241530 -8.822863 176 R A 21 0.06000 0.06000 "ARG " "2HB " "    " 1 0 0 0 FFFFFF  H2391  1 <> 1 0 0 0 0 0 0 <> <> 0 2394 <> 0 0 1 <> <> <> <> <>
  2395 41 47.746302 57.119563 -9.656093 176 R A 21 0.06000 0.06000 "ARG " "1HG " "    " 1 0 0 0 FFFFFF  H2392  1 <> 1 0 0 0 0 0 0 <> <> 0 2395 <> 0 0 1 <> <> <> <> <>
  2396 41 46.184181 56.721473 -10.302218 176 R A 21 0.06000 0.06000 "ARG " "2HG " "    " 1 0 0 0 FFFFFF  H2393  1 <> 1 0 0 0 0 0 0 <> <> 0 2396 <> 0 0 1 <> <> <> <> <>
  2397 41 47.988974 57.465838 -11.958313 176 R A 21 0.06000 0.06000 "ARG " "1HD " "    " 1 0 0 0 FFFFFF  H2394  1 <> 1 0 0 0 0 0 0 <> <> 0 2397 <> 0 0 1 <> <> <> <> <>
  2398 41 46.361298 58.019466 -12.145911 176 R A 21 0.06000 0.06000 "ARG " "2HD " "    " 1 0 0 0 FFFFFF  H2395  1 <> 1 0 0 0 0 0 0 <> <> 0 2398 <> 0 0 1 <> <> <> <> <>
  2399 43 48.387902 59.705175 -10.744362 176 R A 21 0.44000 0.44000 "ARG " " HE " "    " 1 0 0 0 FFFFFF  H2396  1 <> 1 0 0 0 0 0 0 <> <> 0 2399 <> 0 0 1 <> <> <> <> <>
  2400 43 47.178860 60.390986 -14.517996 176 R A 21 0.46000 0.46000 "ARG " "1HH1" "    " 1 0 0 0 FFFFFF  H2397  1 <> 1 0 0 0 0 0 0 <> <> 0 2400 <> 0 0 1 <> <> <> <> <>
  2401 43 46.122857 59.348123 -13.550655 176 R A 21 0.46000 0.46000 "ARG " "2HH1" "    " 1 0 0 0 FFFFFF  H2398  1 <> 1 0 0 0 0 0 0 <> <> 0 2401 <> 0 0 1 <> <> <> <> <>
  2402 44 48.408655 61.997453 -13.474553 176 R A 21 0.46000 0.46000 "ARG " "1HH2" "    " 1 0 0 0 FFFFFF  H2399  1 <> 1 0 0 0 0 0 0 <> <> 0 2402 <> 0 0 1 <> <> <> <> <>
  2403 44 48.815431 61.898471 -11.772484 176 R A 21 0.46000 0.46000 "ARG " "2HH2" "    " 1 0 0 0 FFFFFF  H2400  1 <> 1 0 0 0 0 0 0 <> <> 0 2403 <> 0 0 1 <> <> <> <> <>
  2404 25 44.343366 59.634857 -6.702919 177 N A 43 -0.50000 -0.50000 "ASN " " N  " "    " 7 0 0 0 5757FF  N2401  1 <> 1 0 0 0 0 0 0 <> <> 0 2404 <> 0 0 1 <> <> <> <> <>
  2405 3 44.182128 60.550145 -5.563968 177 N A 2 0.14000 0.14000 "ASN " " CA " "    " 6 0 0 0 A0A0A0  C2402  1 <> 1 0 0 0 0 0 0 <> <> 0 2405 <> 0 0 1 <> <> <> <> <>
[truncated: 21,441,503 more chars]
